# Supplementary material for: Evaluation of P-bridged biaryl phosphine ligands in palladium-catalysed Suzuki–Miyaura cross-coupling reactions
Source: Royal Society of Chemistry journal article supplement (doi:10.1039/d1ra04947j), 2021-01-01
Supplement: d1ra04947j1.pdf [file d1ra04947j1.pdf]

## SUPPORTING INFORMATION

### Supporting Information

#### Evaluation of P-bridged biaryl phosphine ligands in palladium-catalysed Suzuki-Miyaura cross-coupling reactions

Jairus L. Lamola, Paseka T. Moshapo, Cedric W. Holzapfel, and Munaka Christopher Maumela.

Table of Contents

|                                                    |      |
|----------------------------------------------------|------|
| NMR and HRMS spectra: Ligands and precursors ..... | S1   |
| Crystallographic Data .....                        | S25  |
| Catalytic evaluation.....                          | S62  |
| NMR spectra: Suzuki products.....                  | S72  |
| GC Data .....                                      | S108 |
| References .....                                   | S207 |

#### NMR and HRMS spectra: Ligands and precursors

**Ligand 1** (NMR experiments carried out in  $\text{CDCl}_3$ )

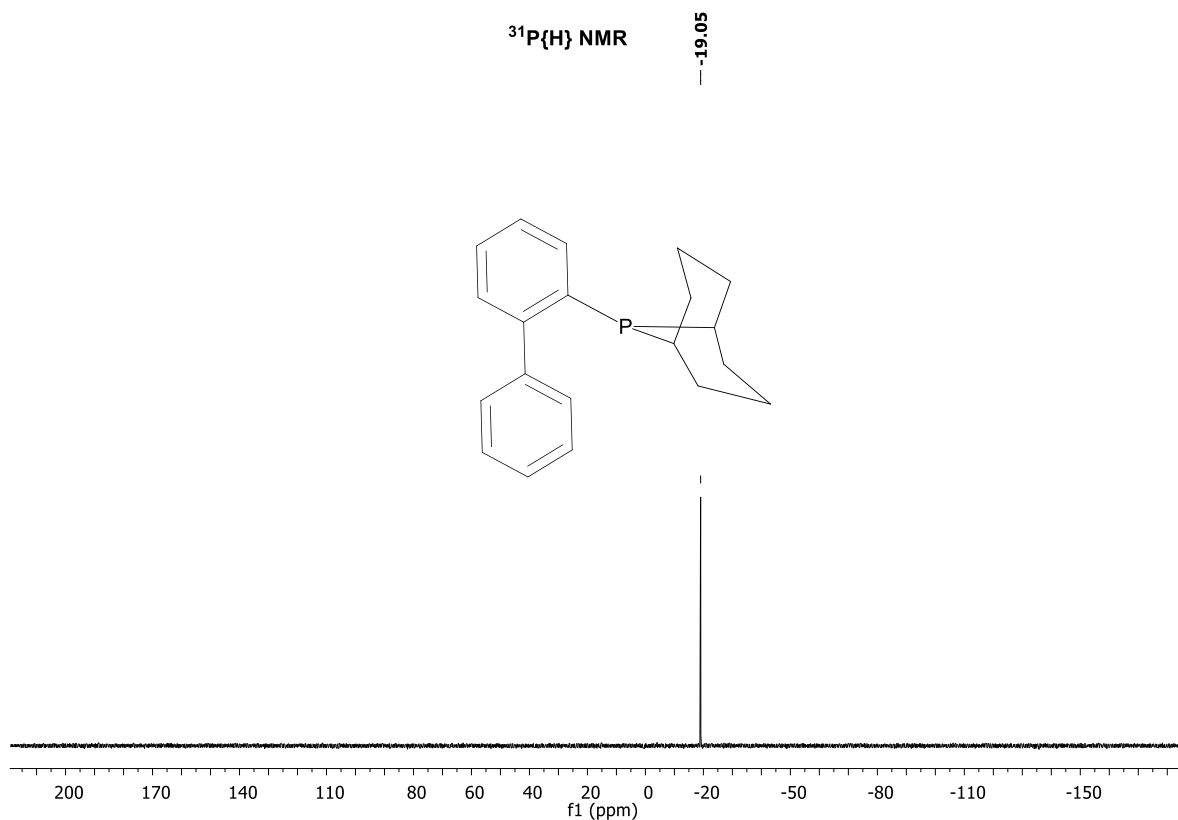

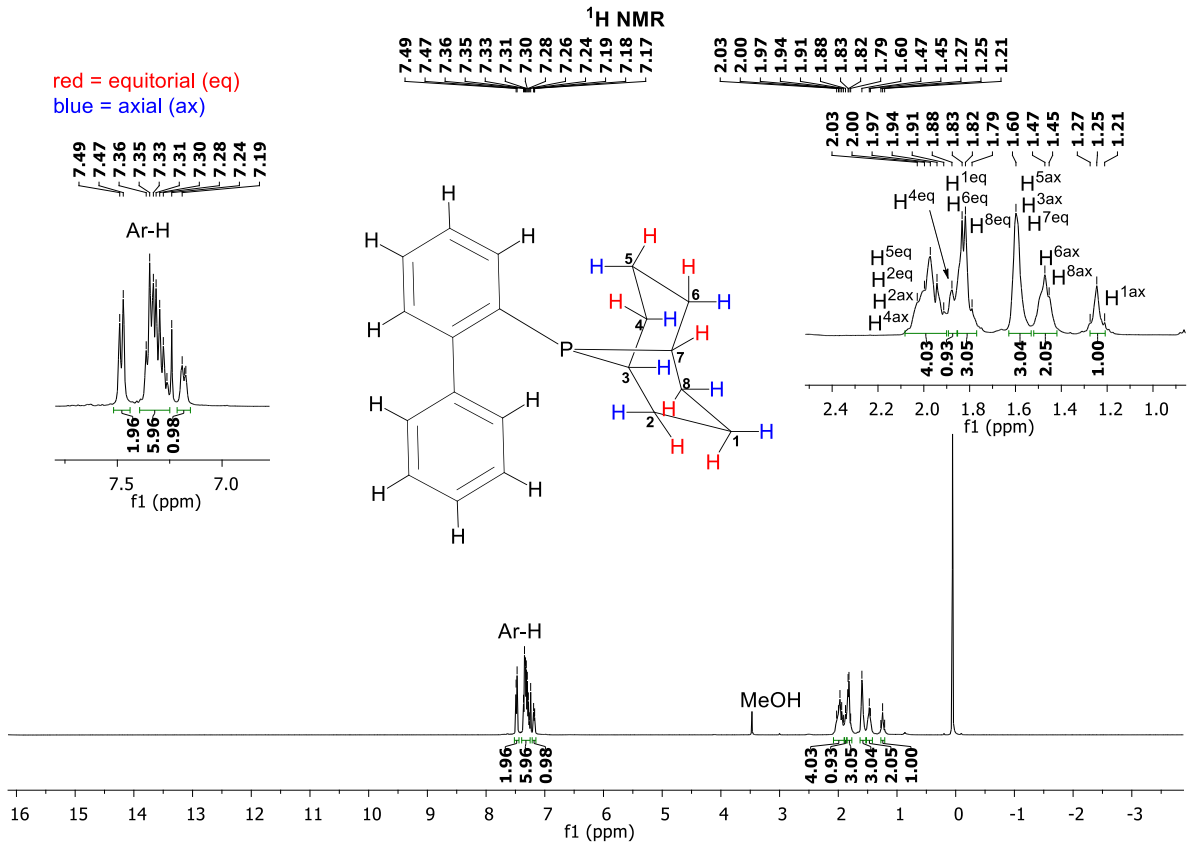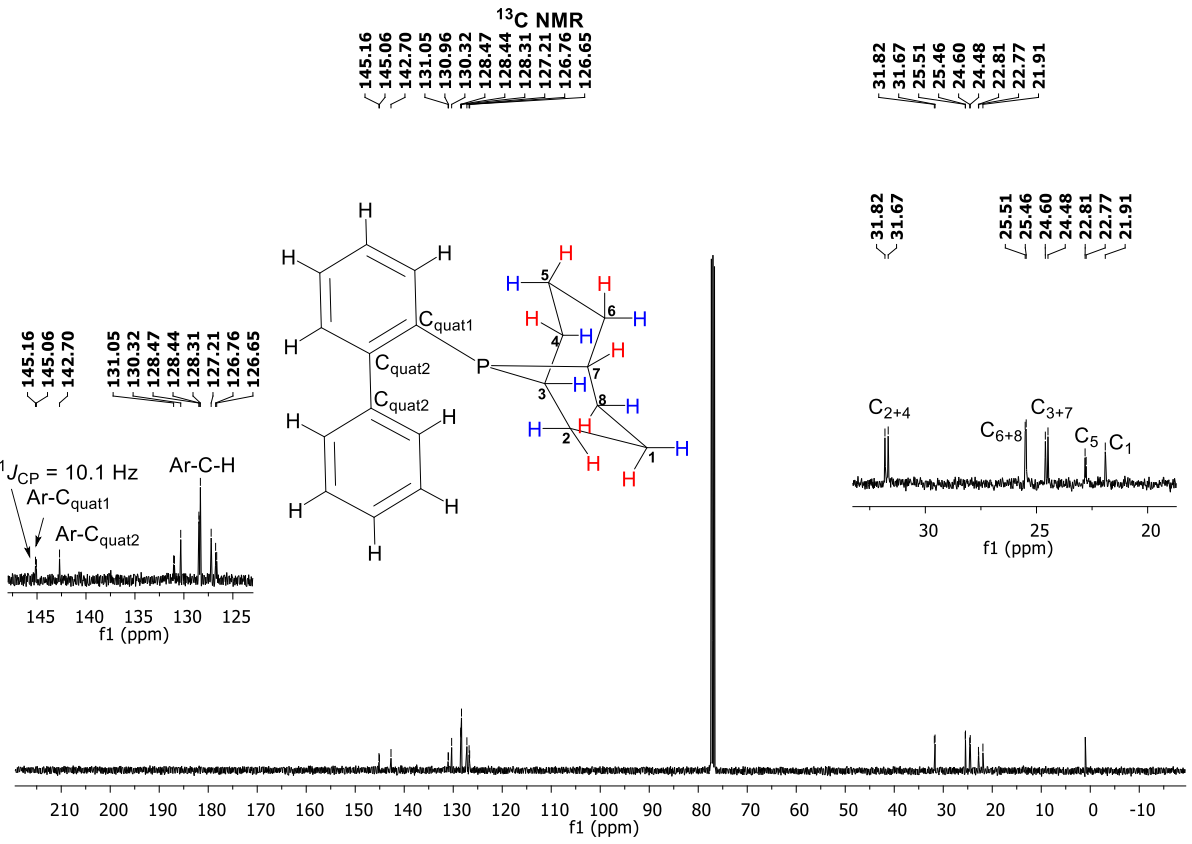

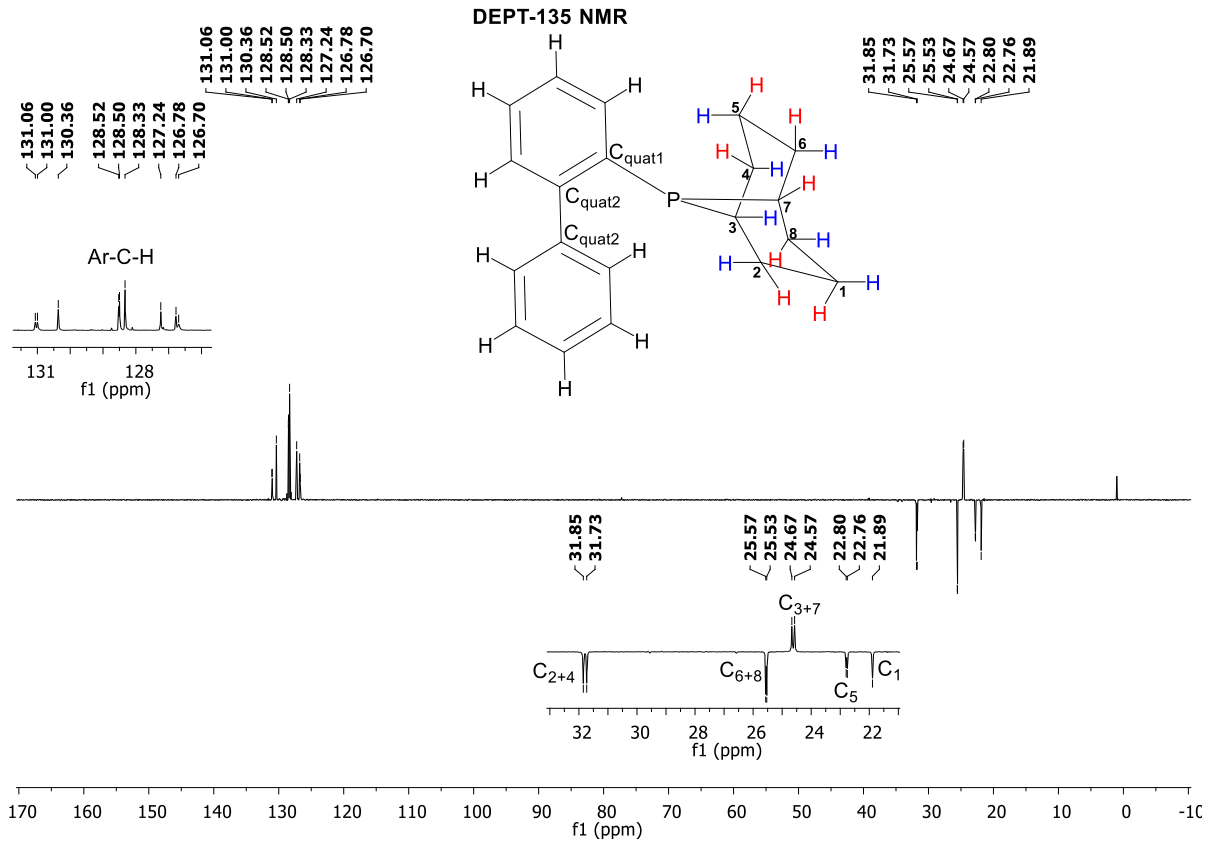

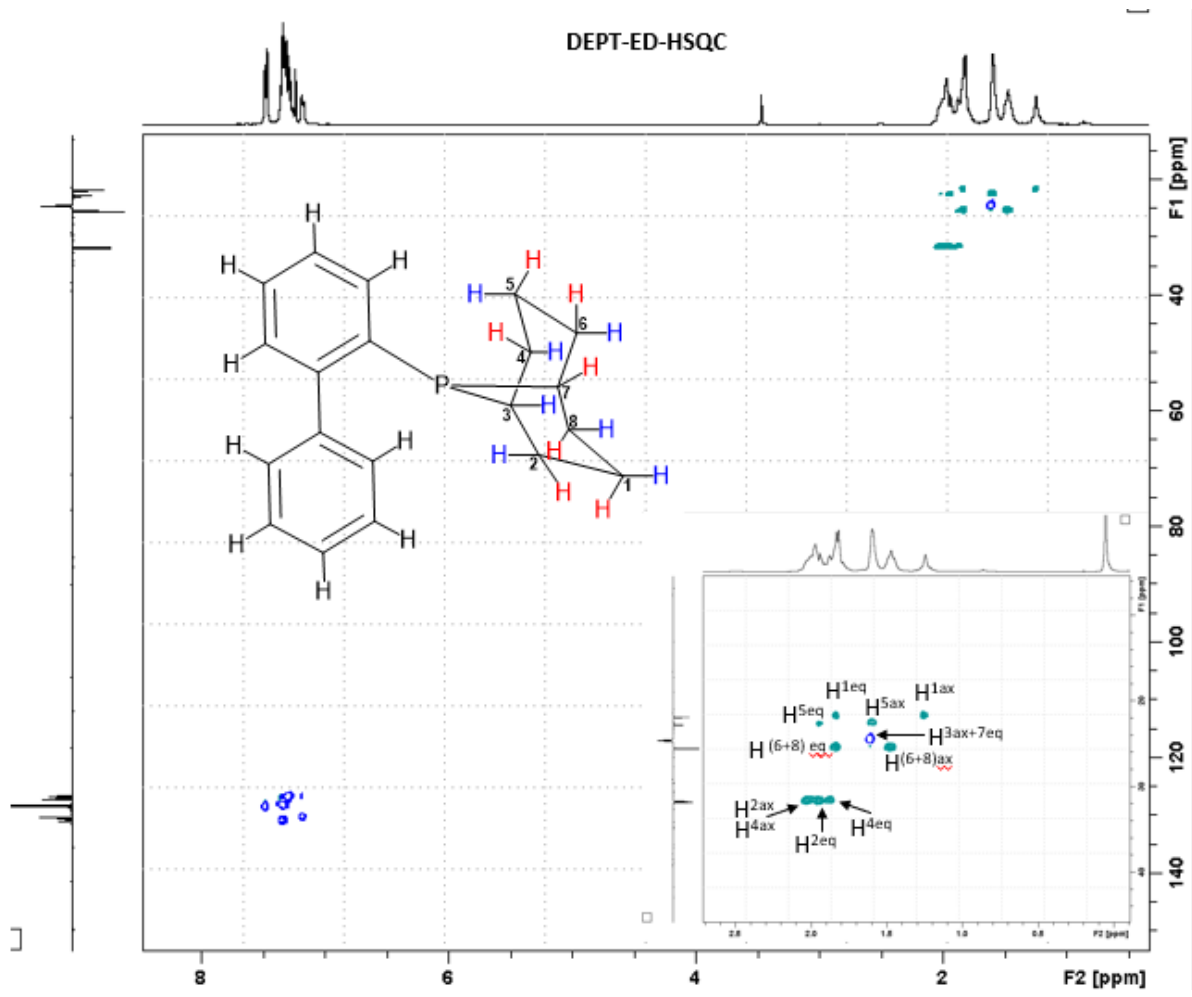

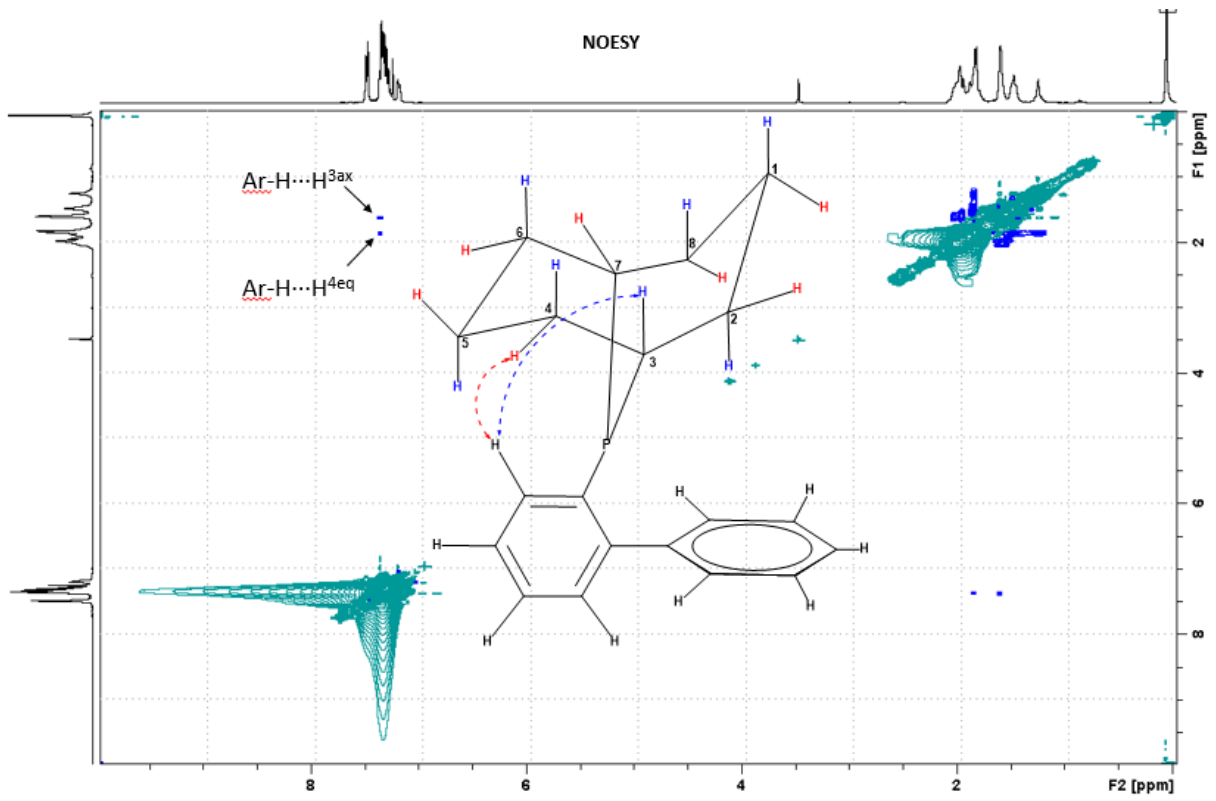

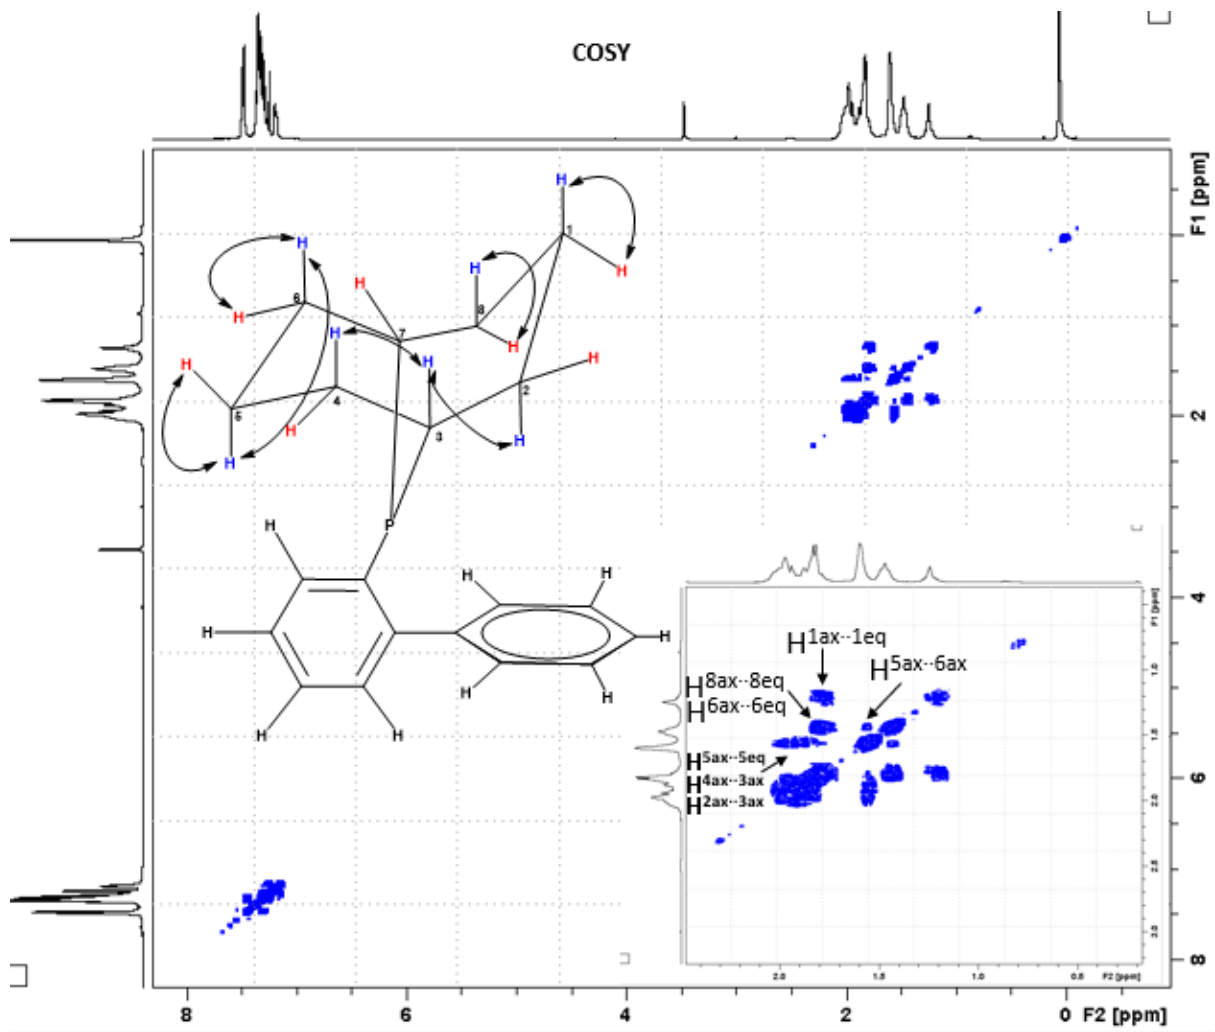

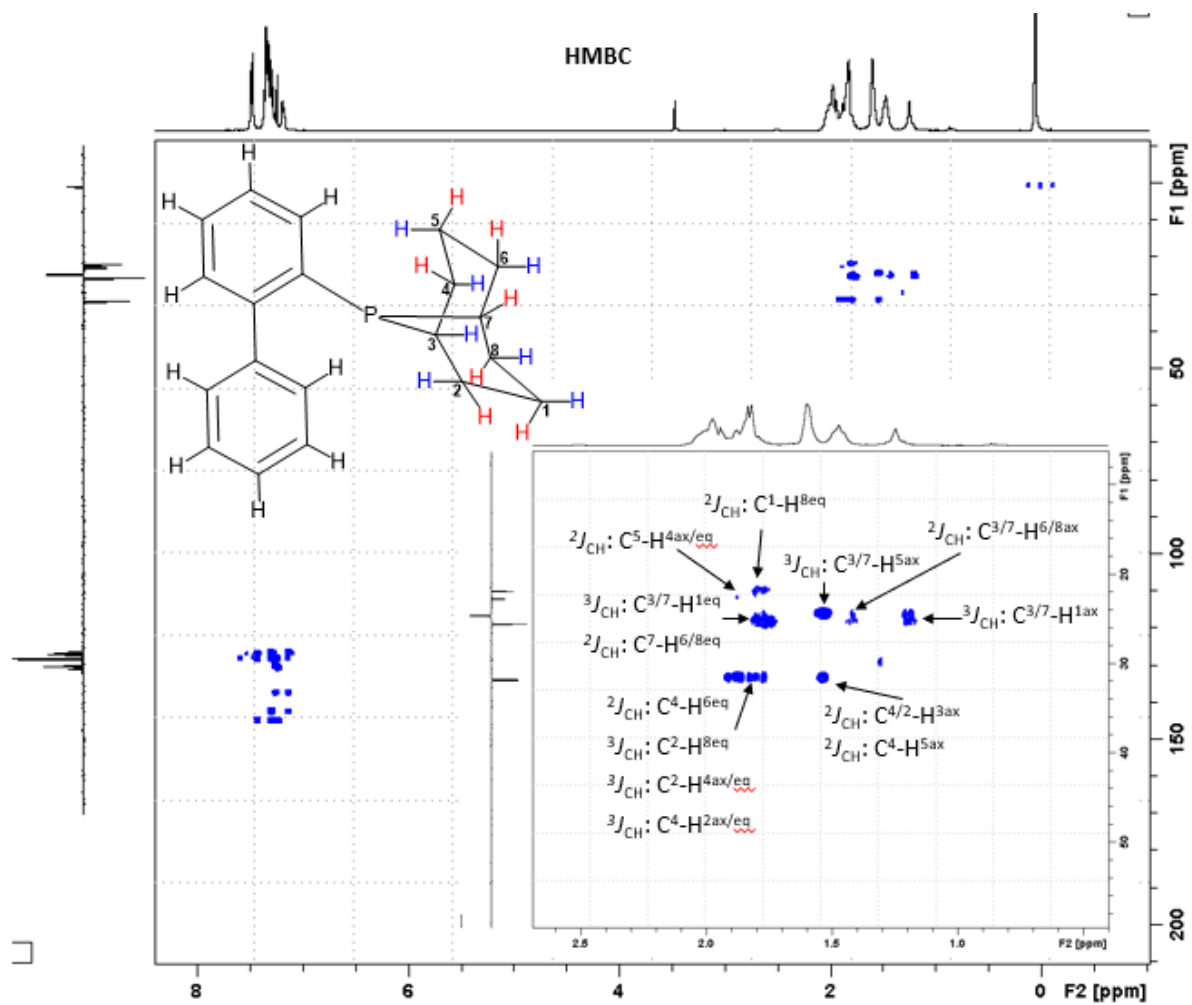

L1 John Phob  
MSDirect\_200424\_28 18 (0.122) Cm (18.26)

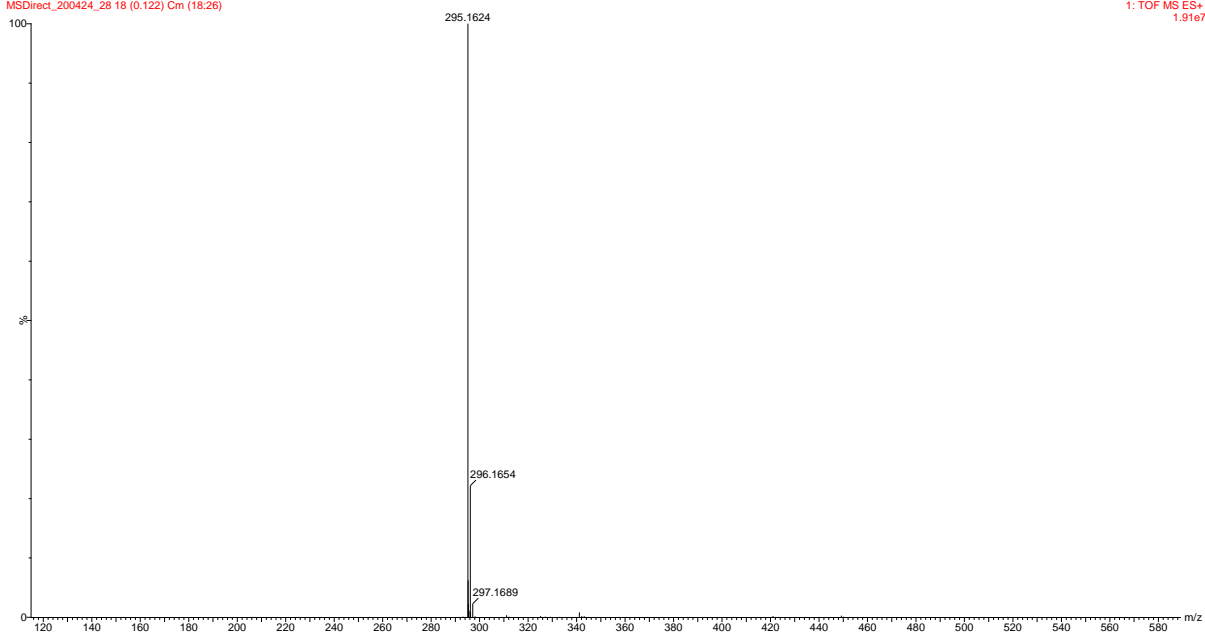

**Ligand 2** (NMR experiments carried out in CDCl<sub>3</sub>)

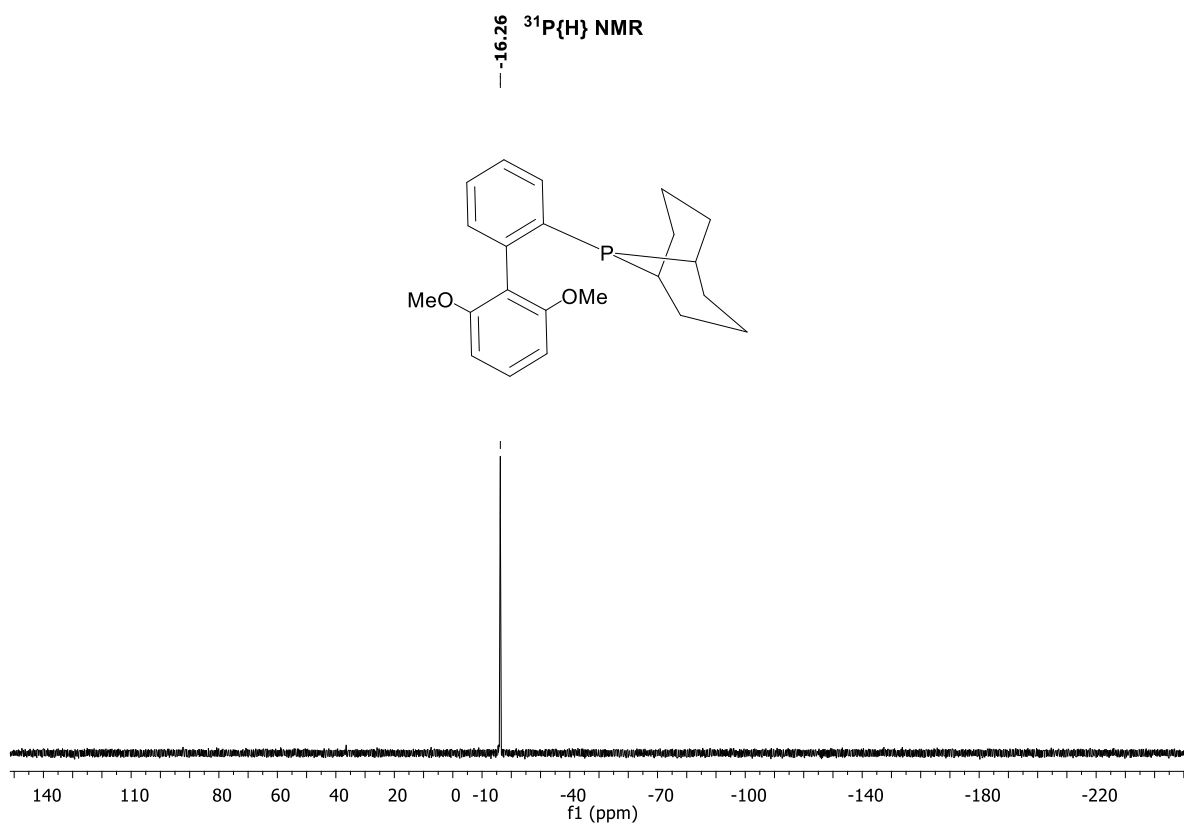



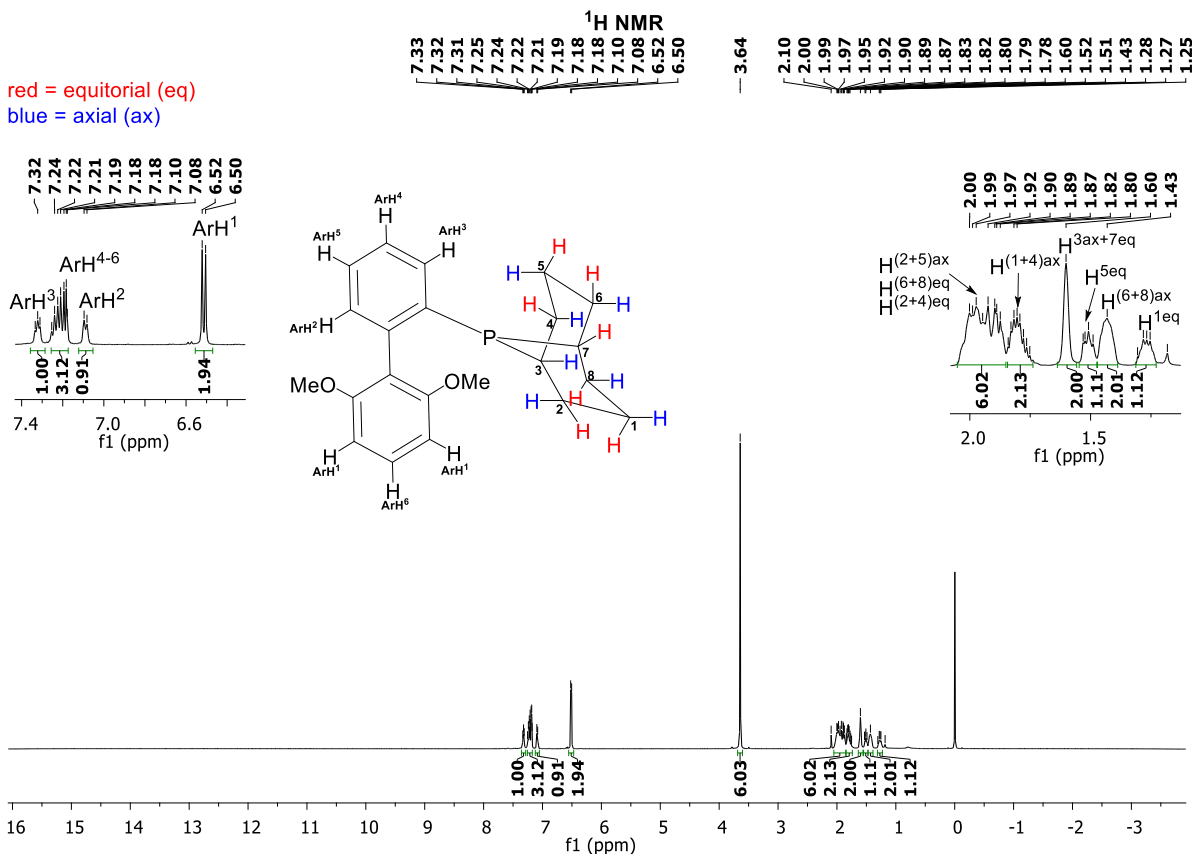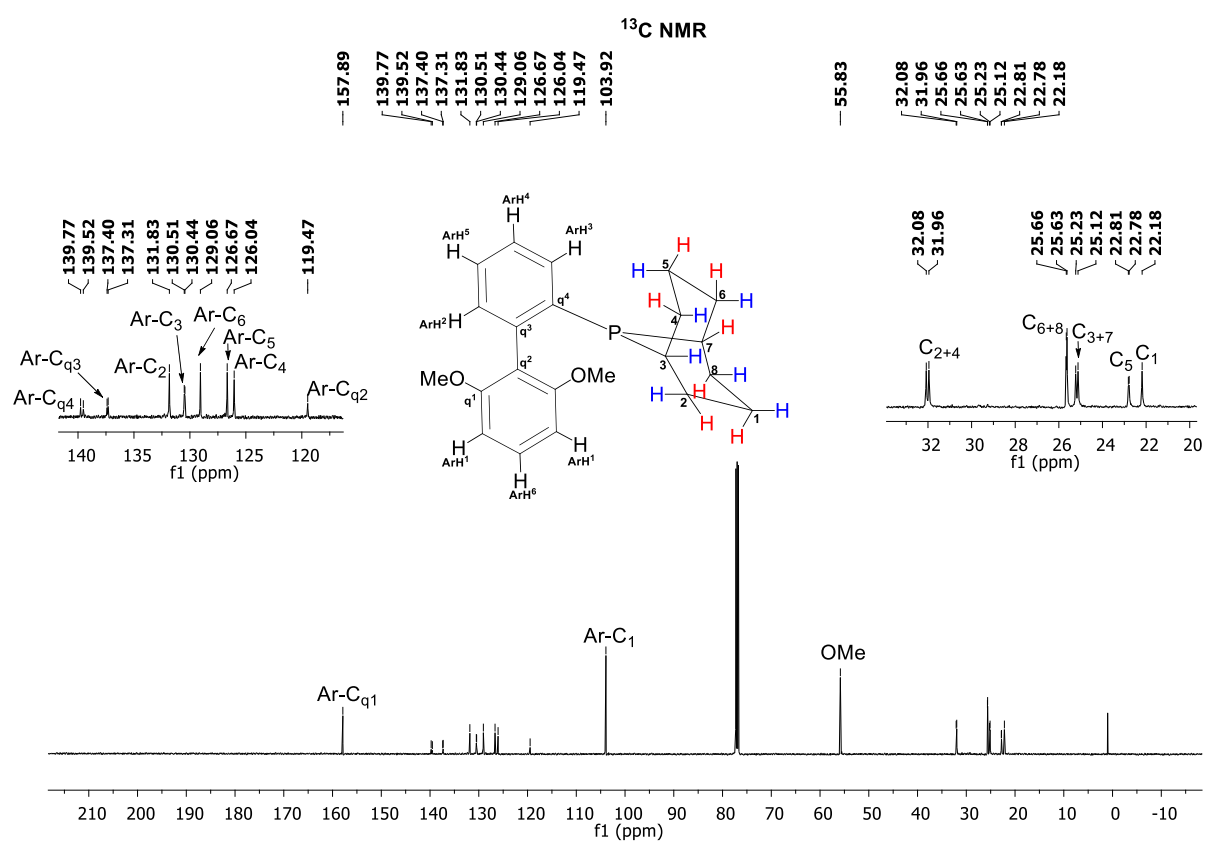

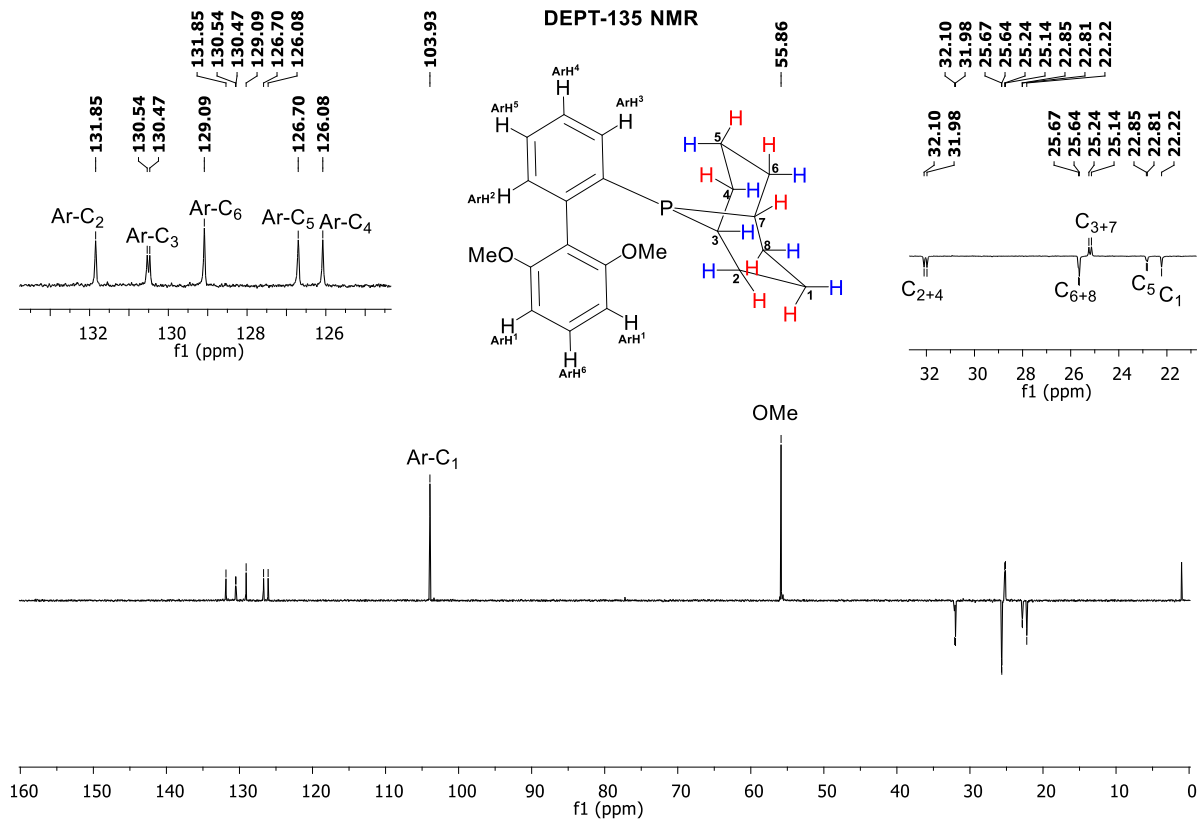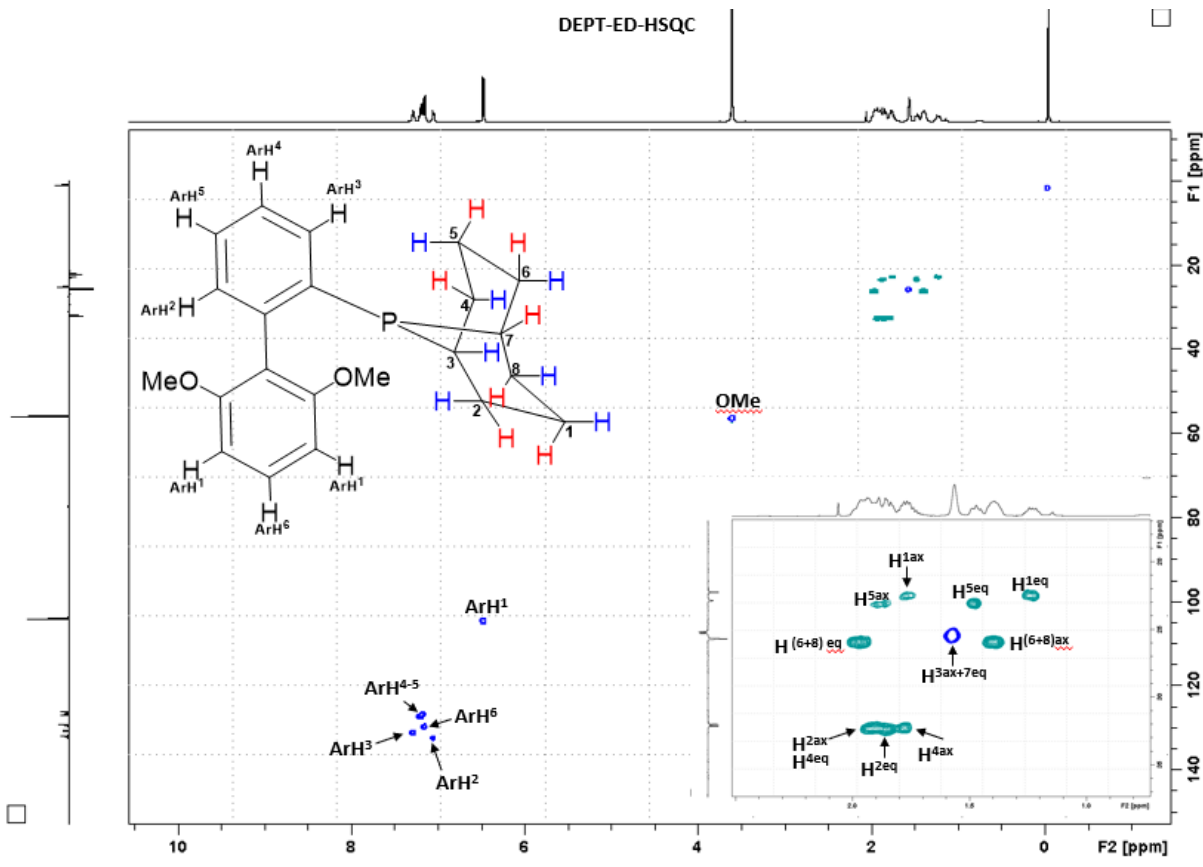

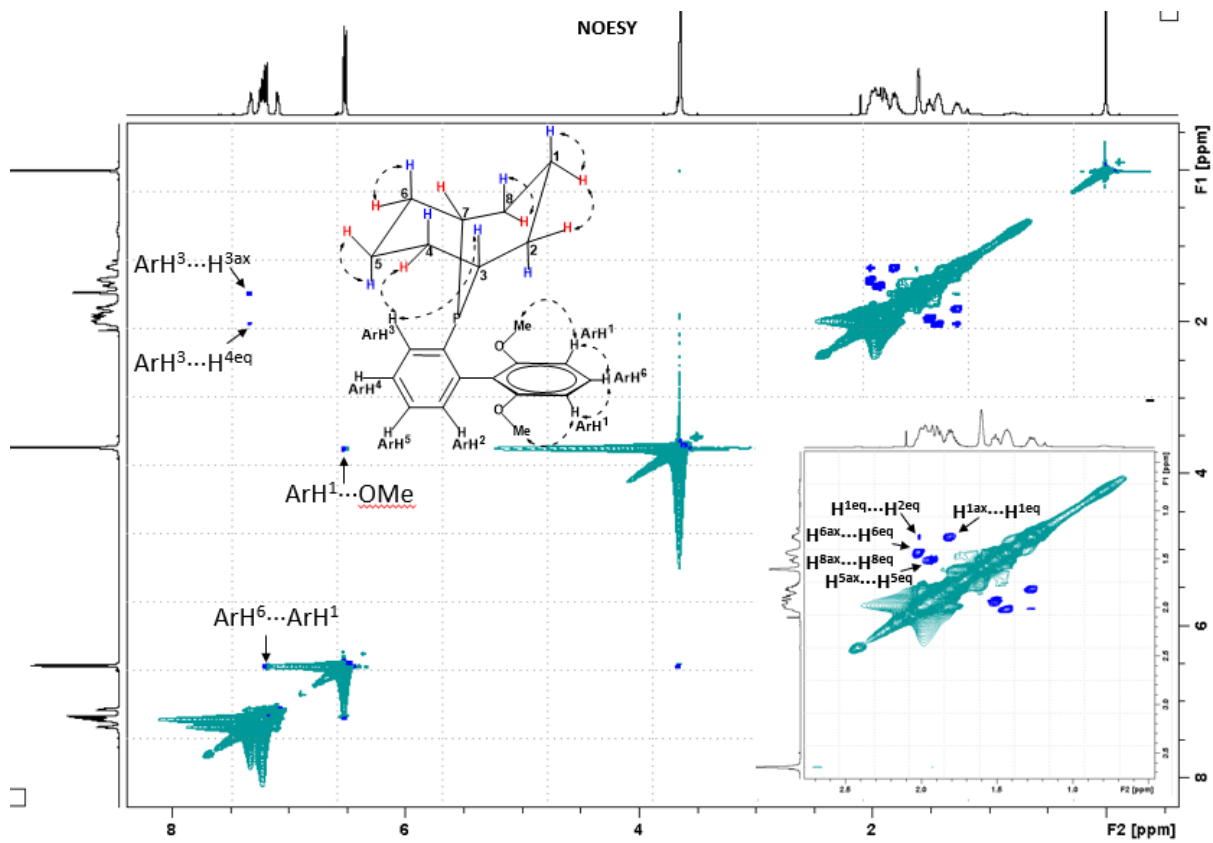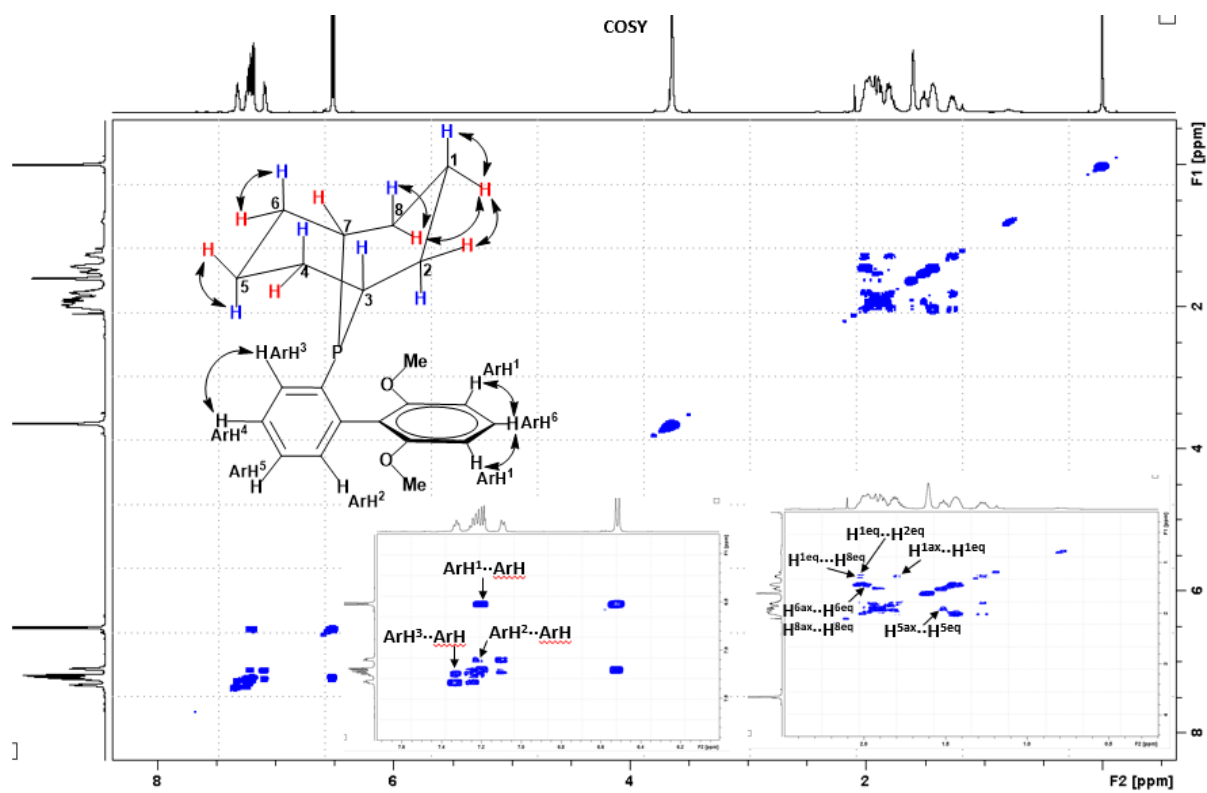

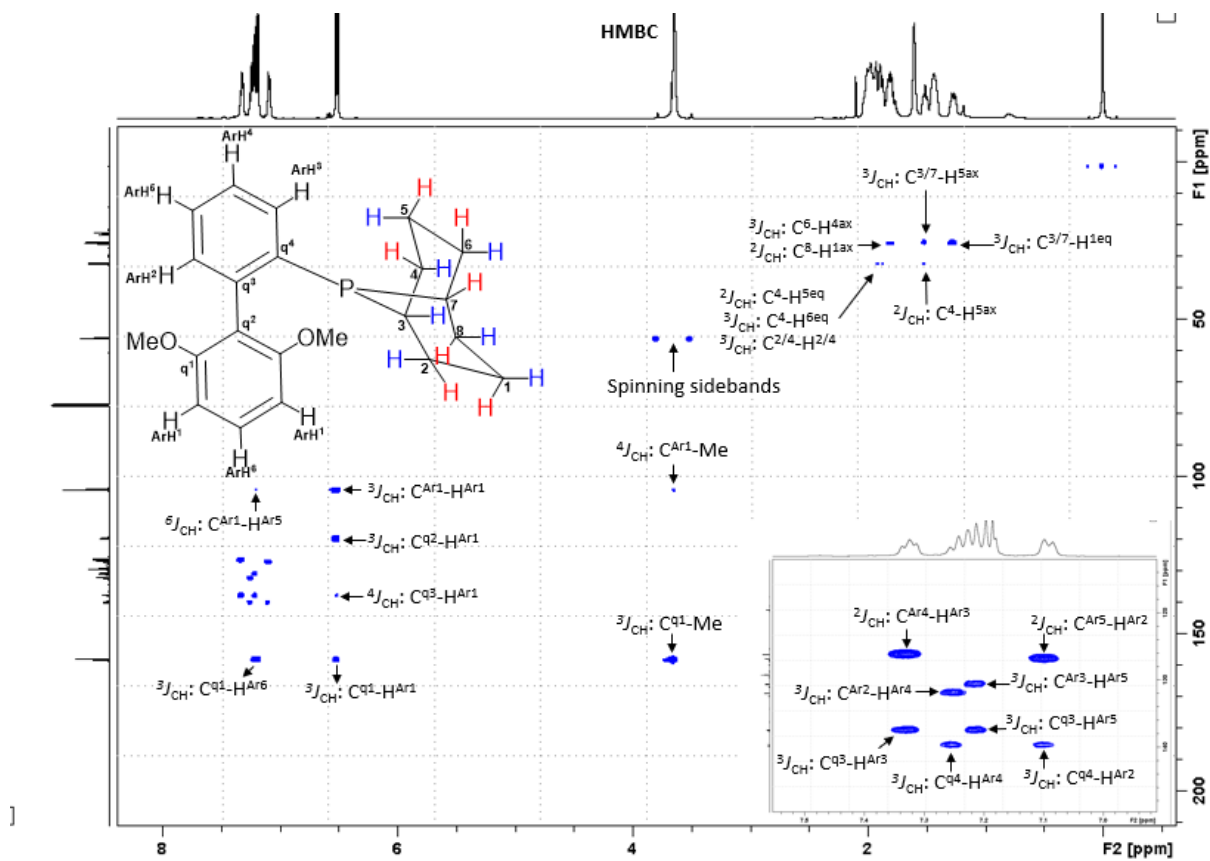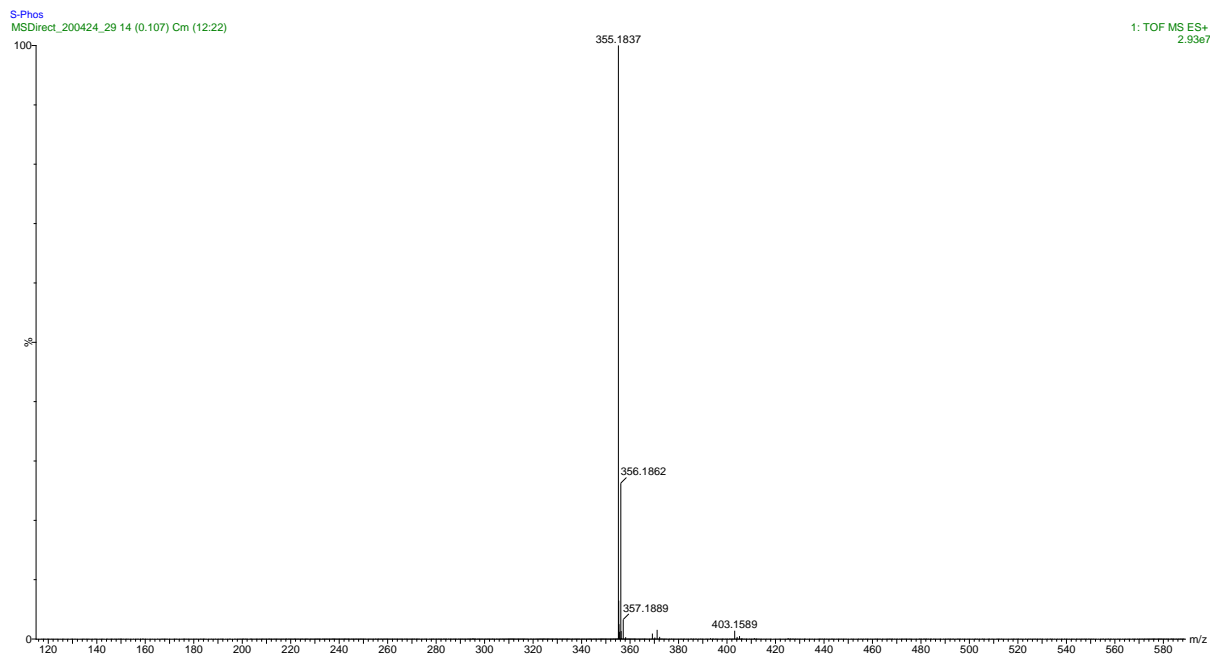

Ligand 3 (NMR experiments carried out in CDCl<sub>3</sub>)

<sup>31</sup>P{H} NMR

--39.06

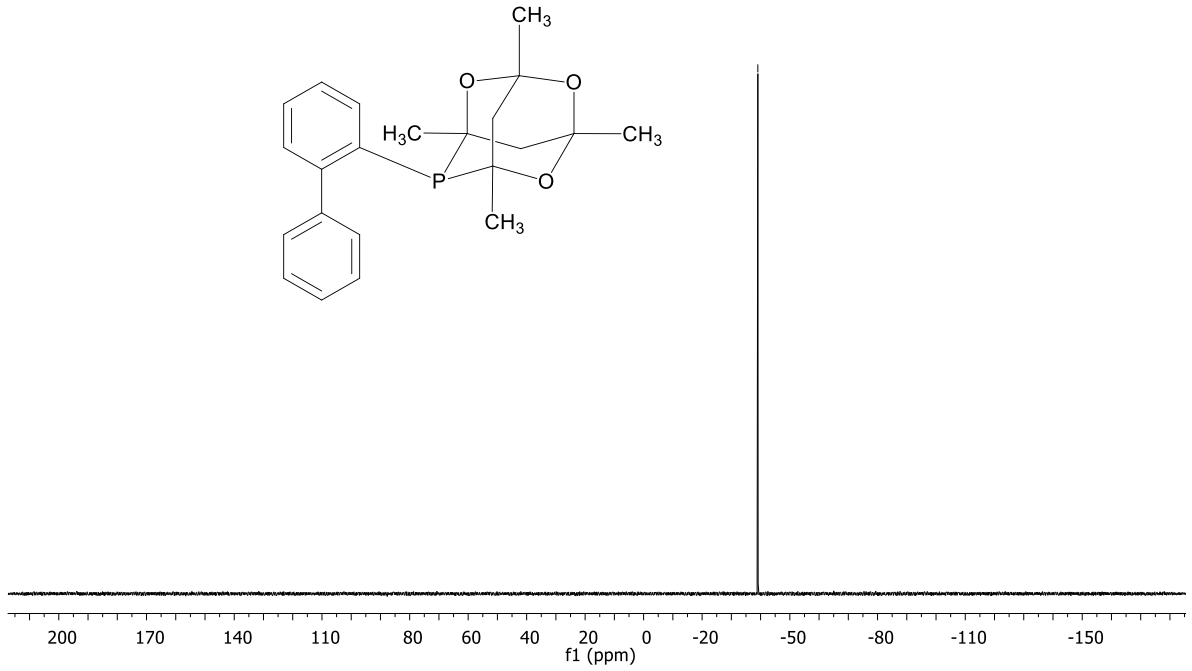

<sup>1</sup>H NMR

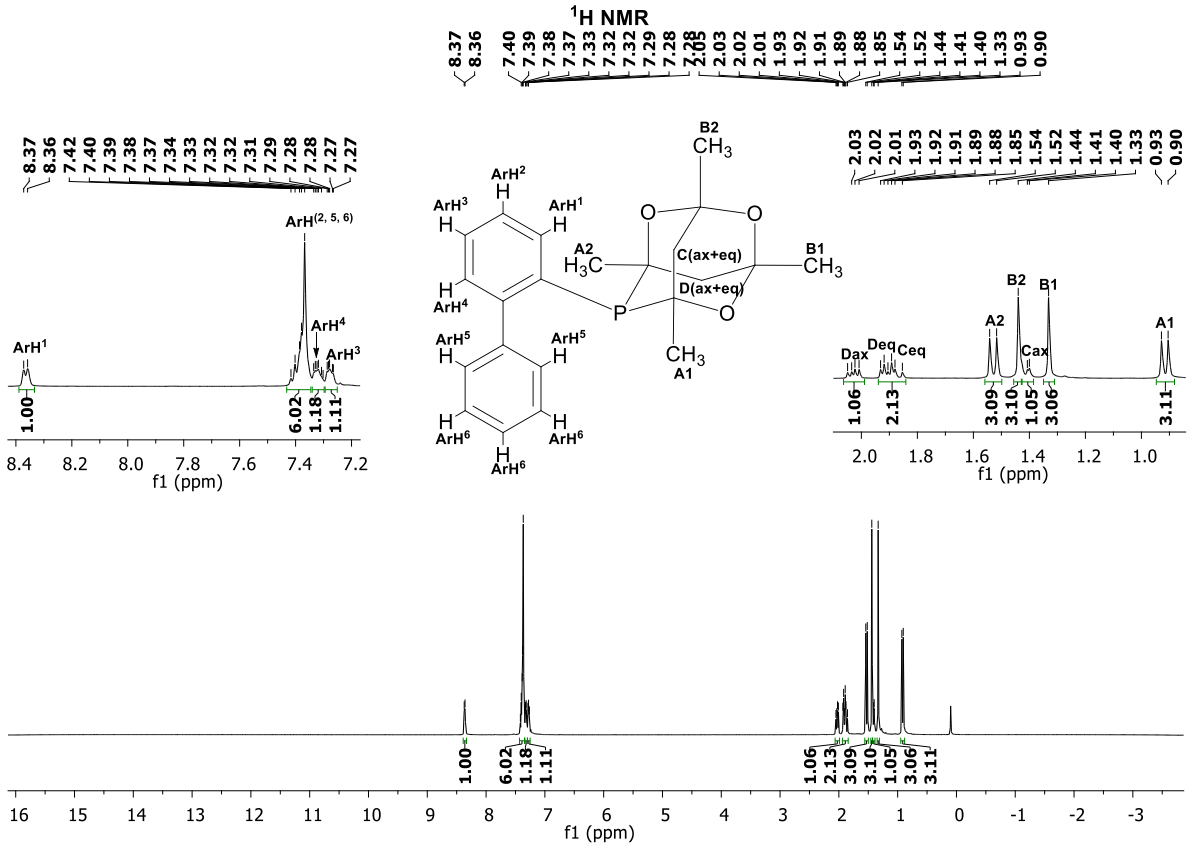

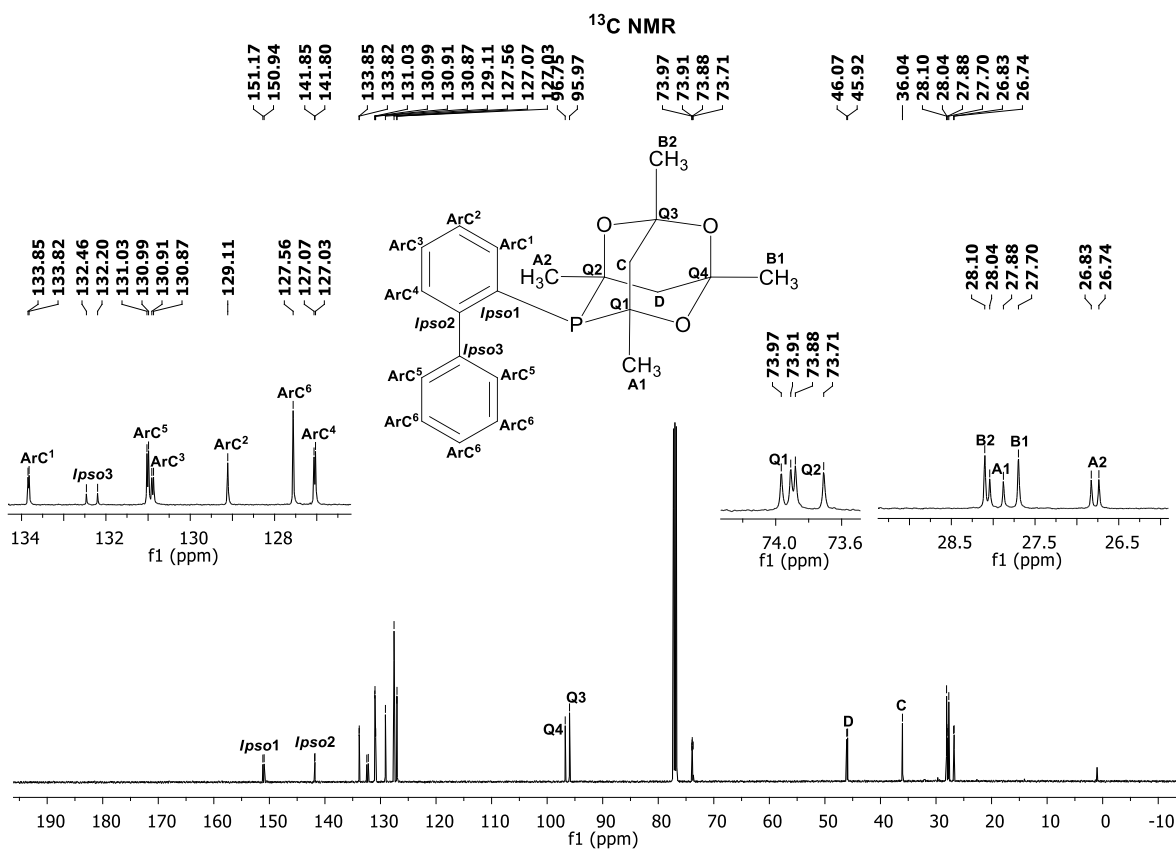

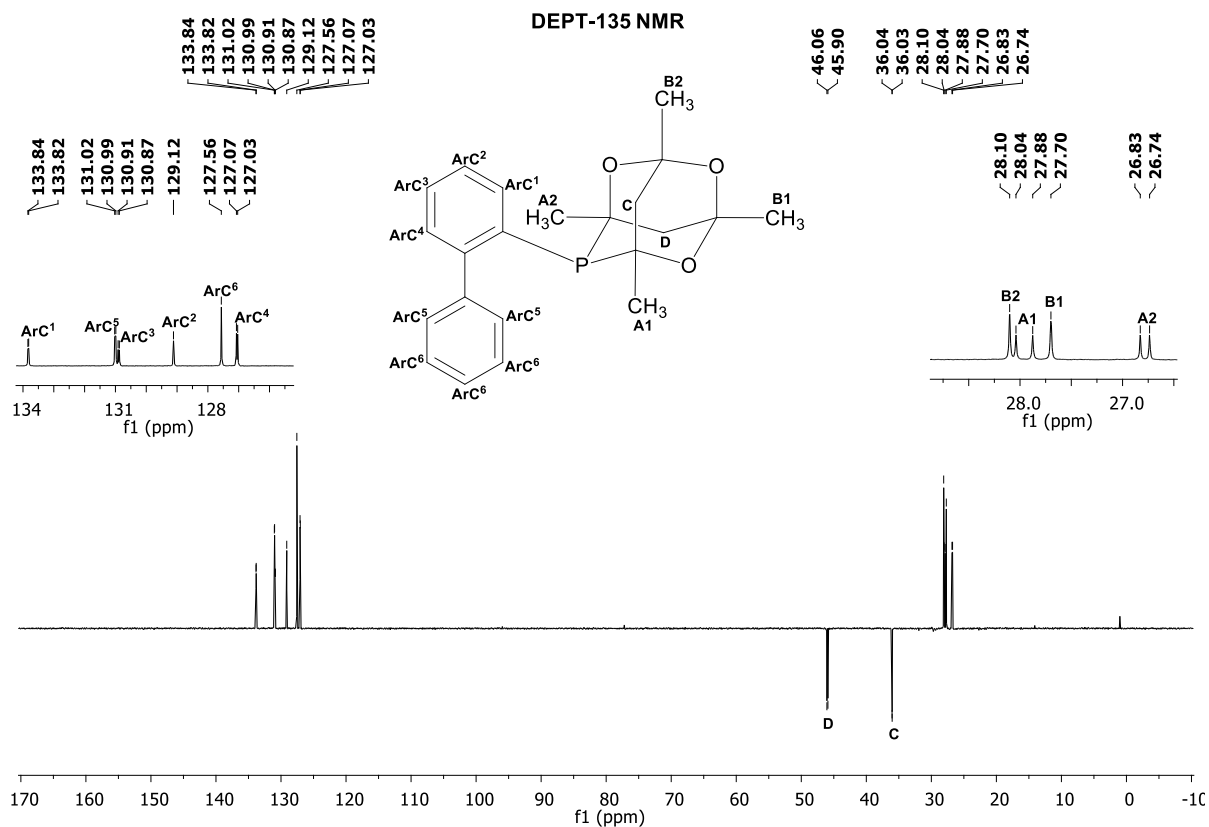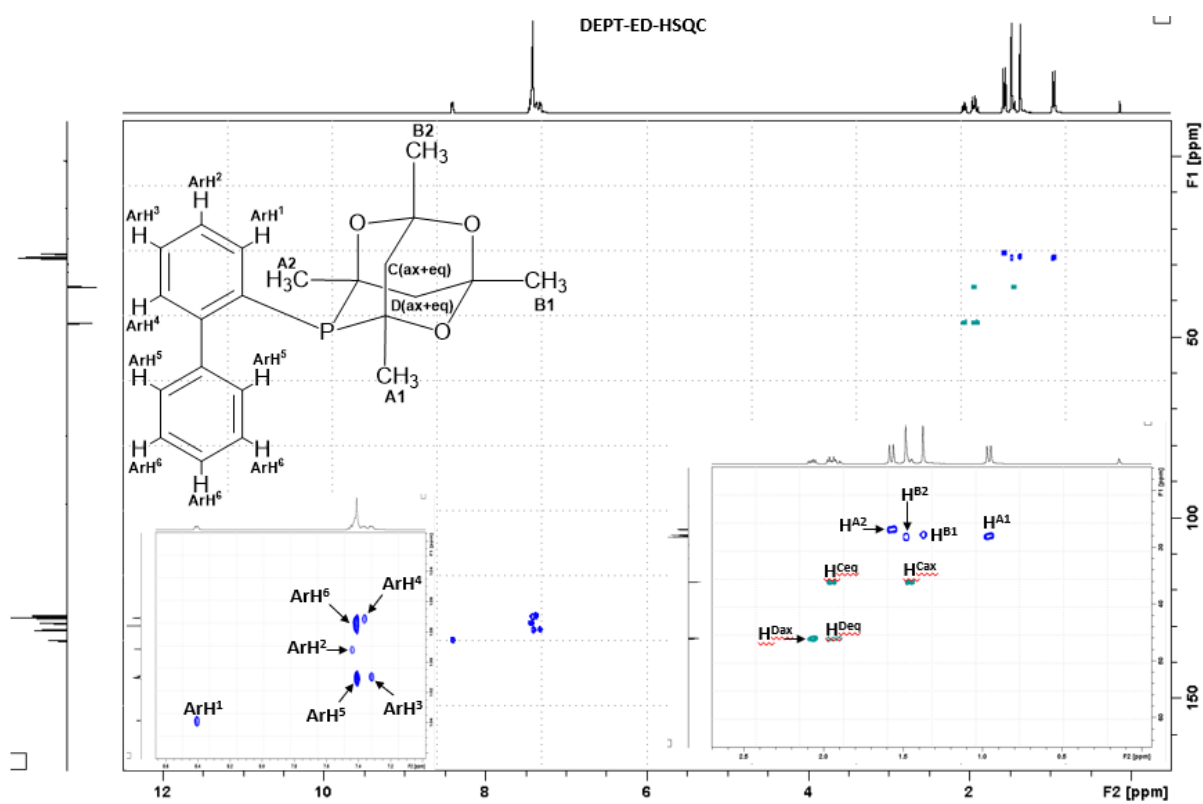

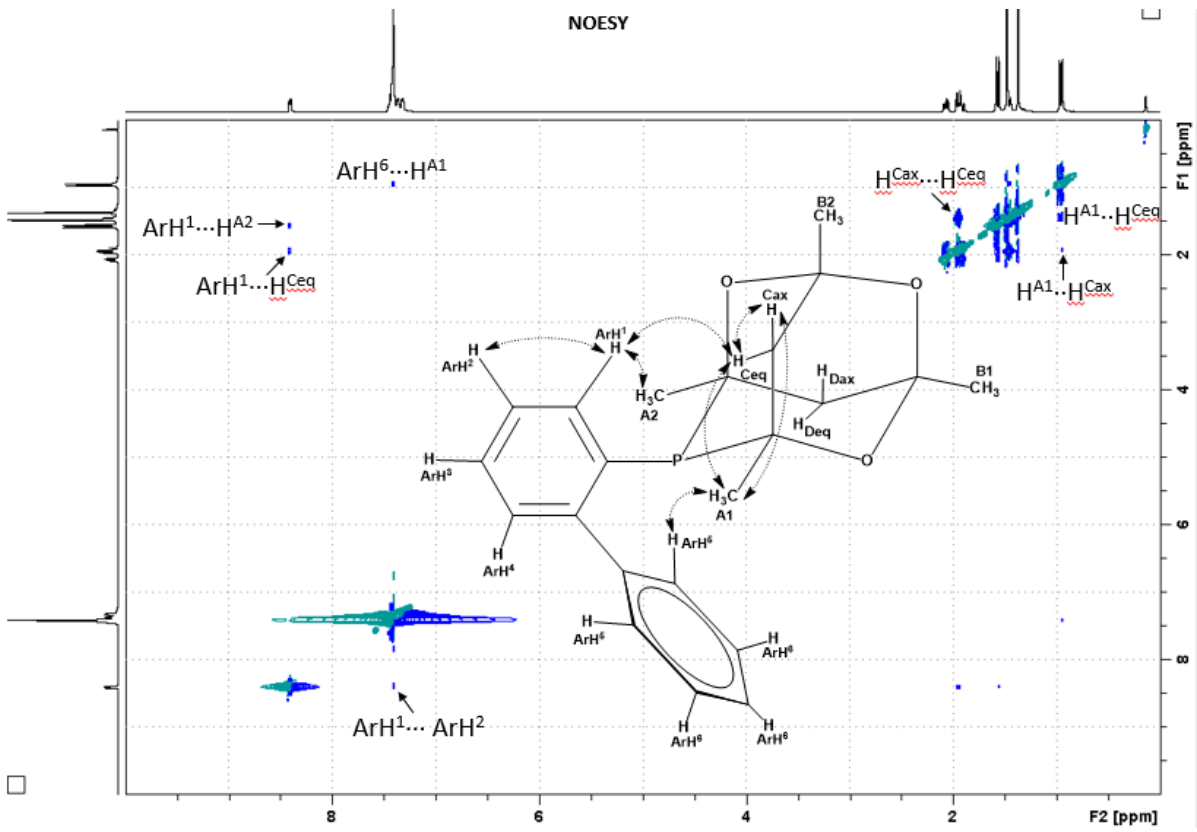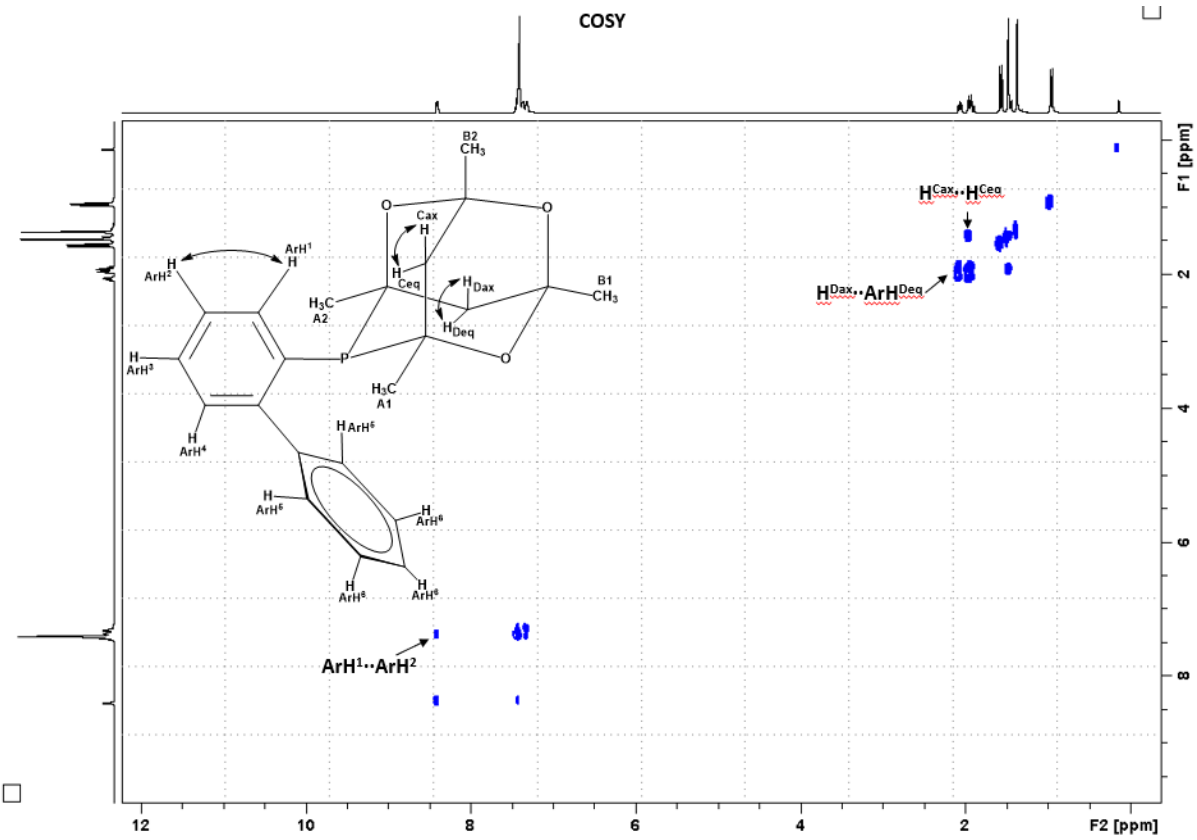





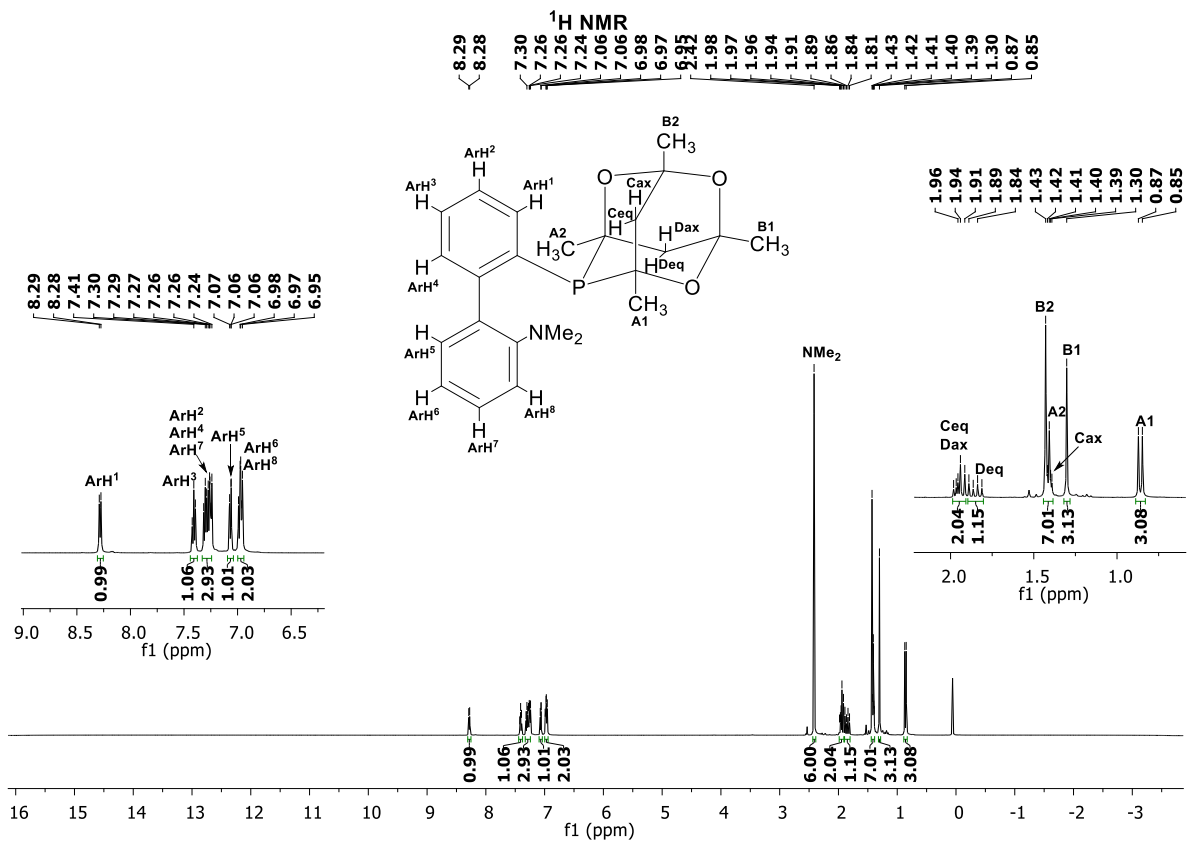

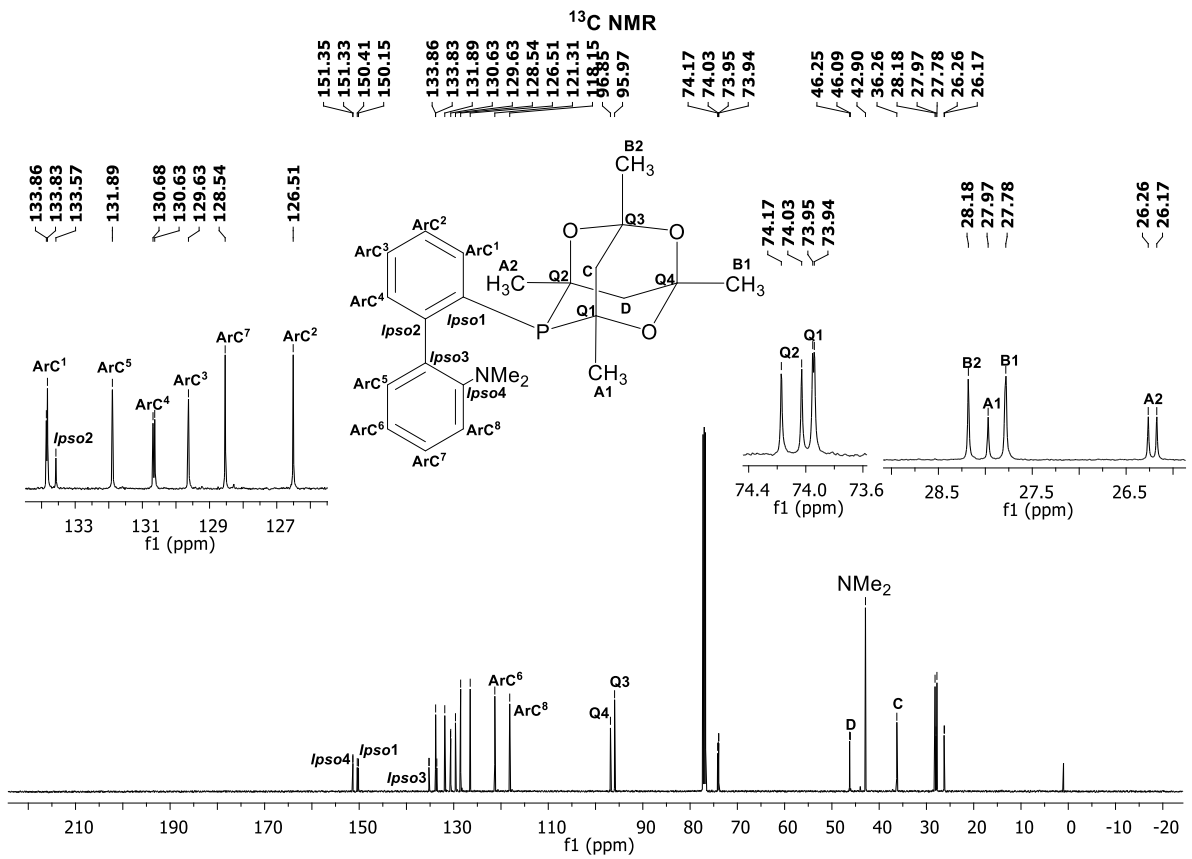

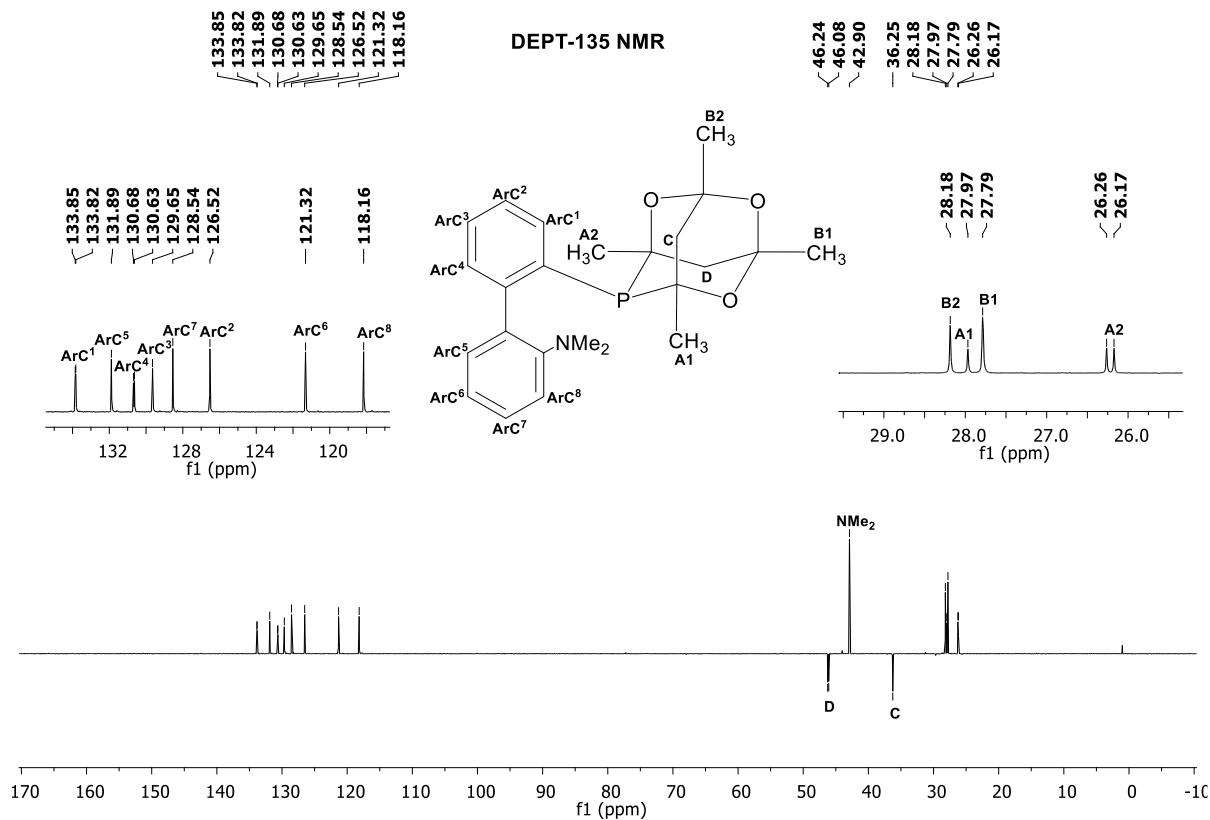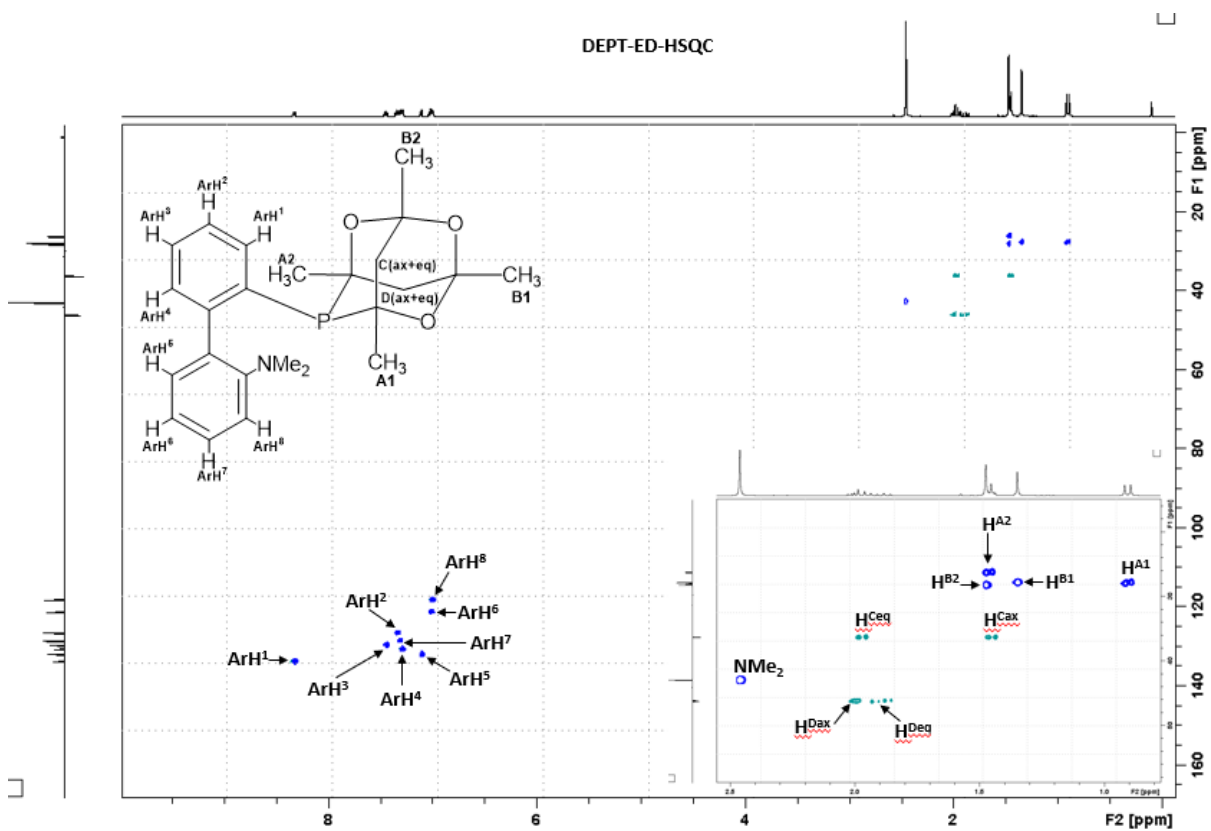

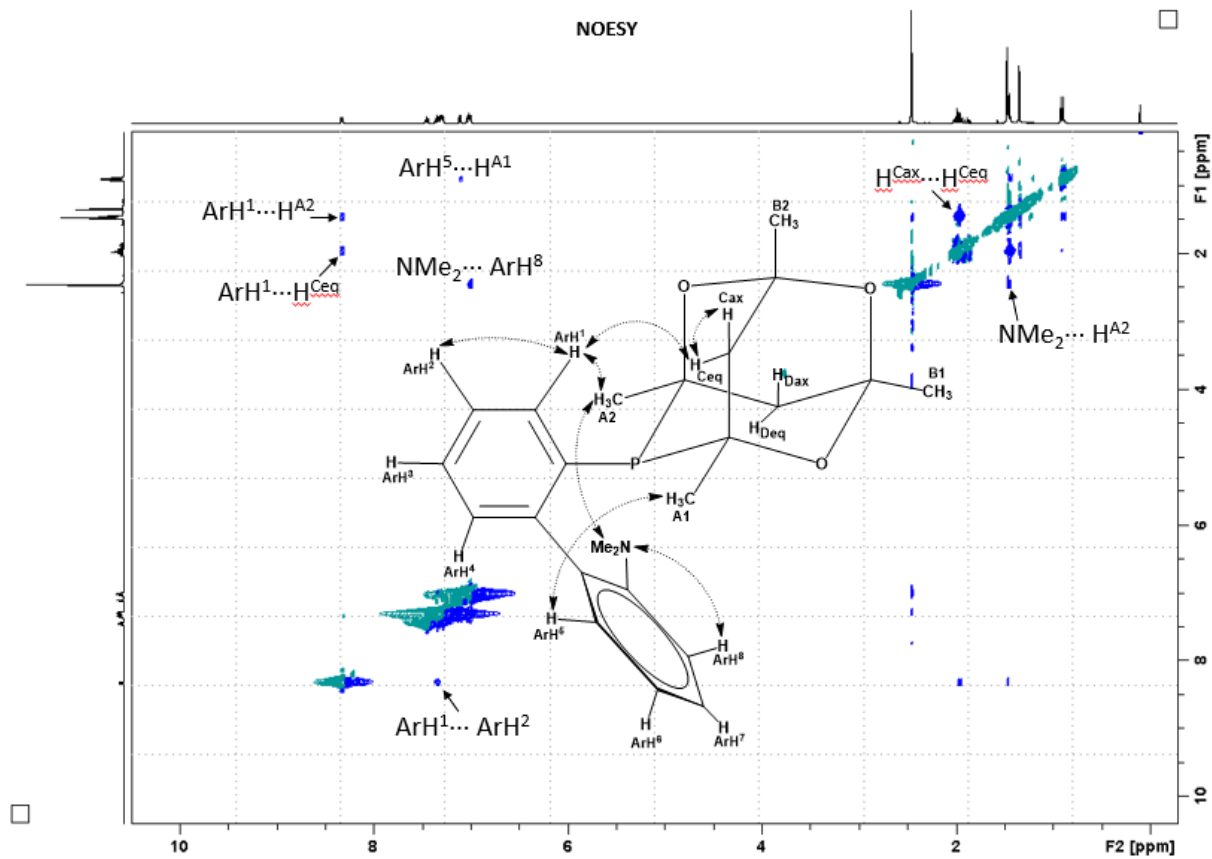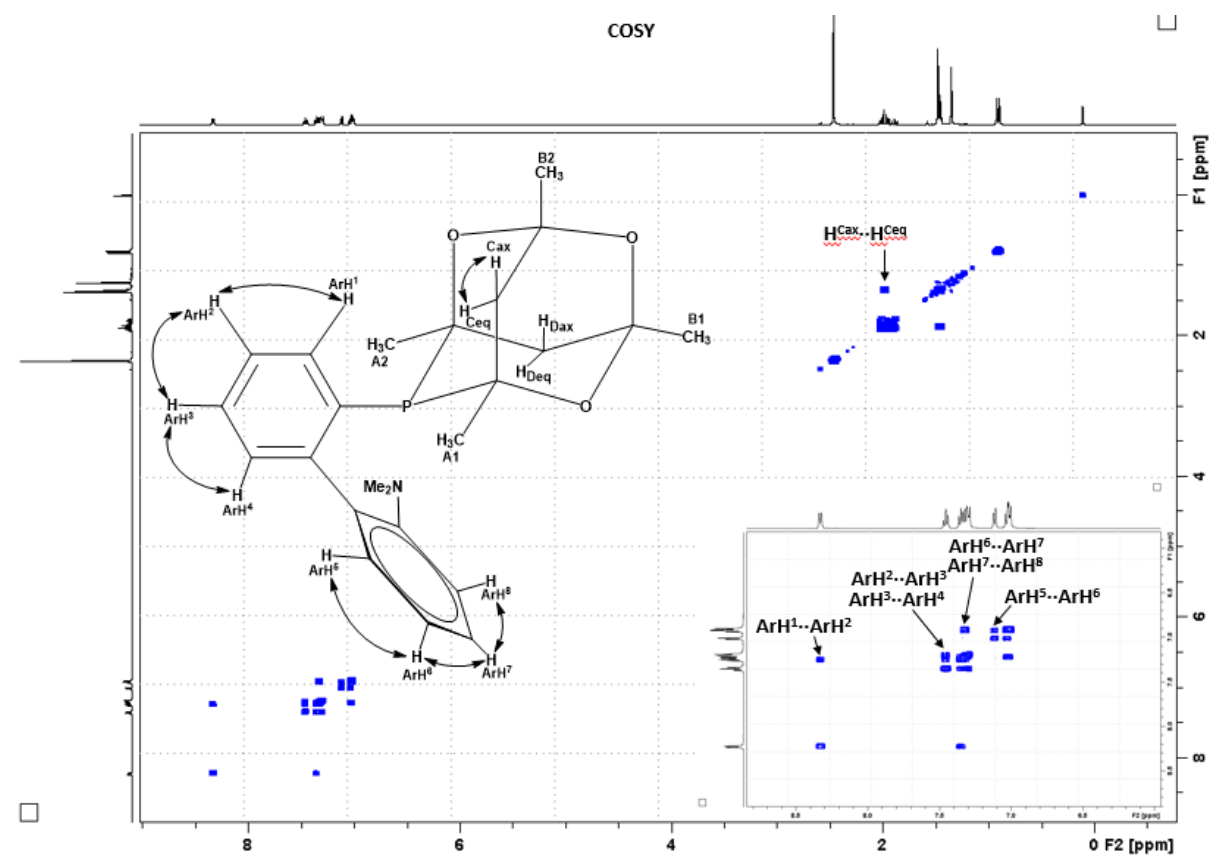

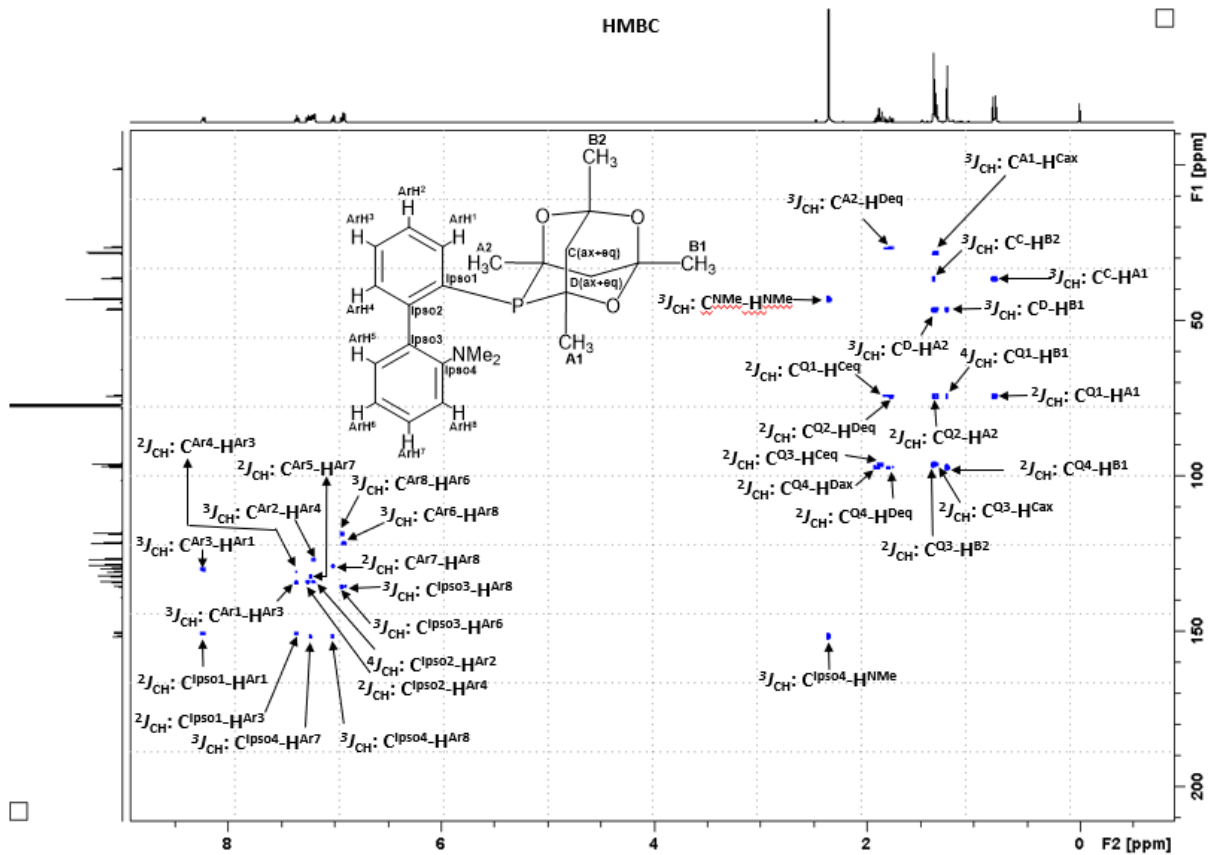

Cg-DavePhos  
MS\_Direct\_201105\_UJ69b 25 (0.168) Cm (25)

1: TOF MS ES+  
7.53e5

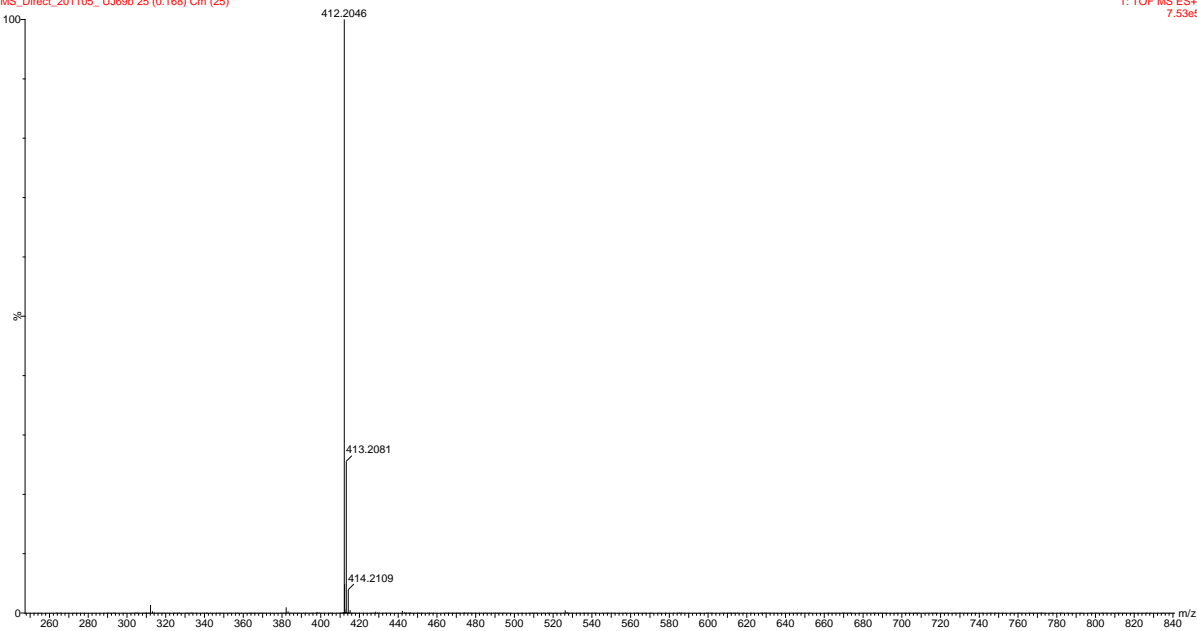

s-Phob-H [3.3.1]

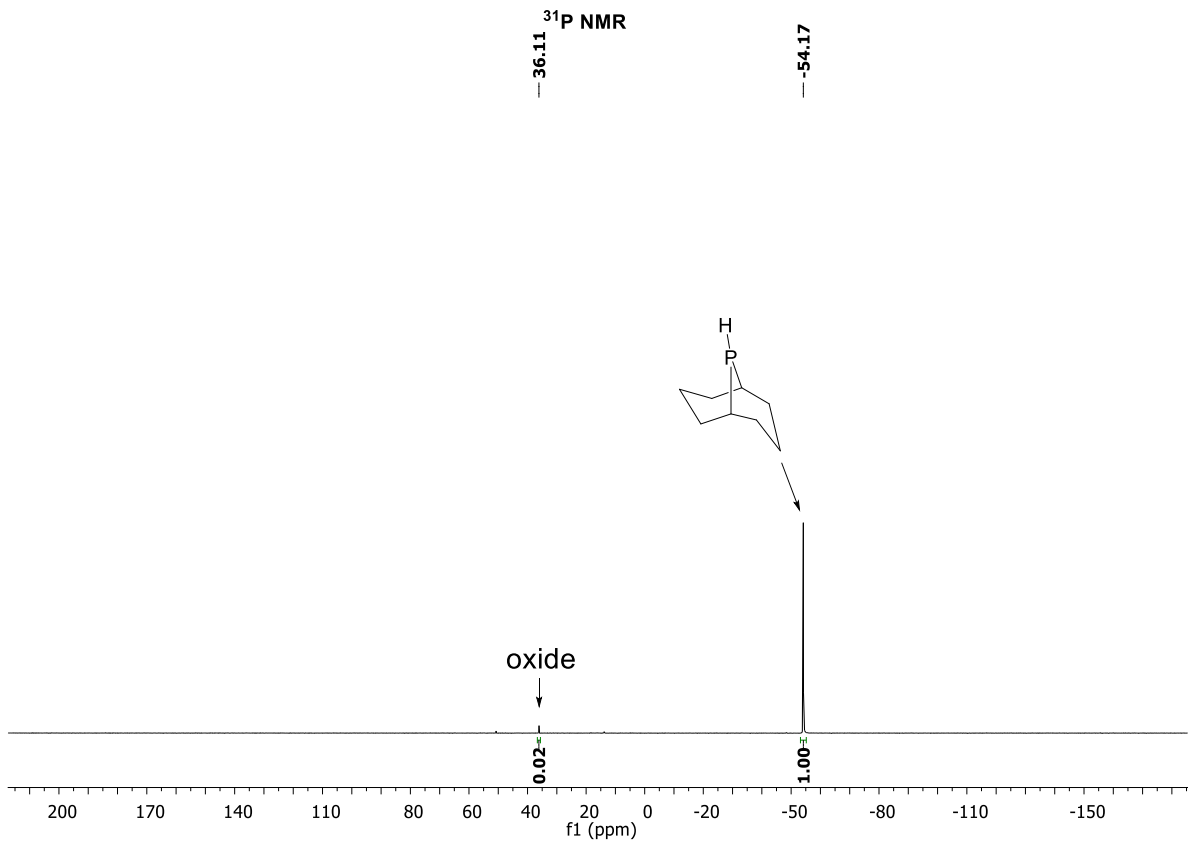

s-Phob-Cl

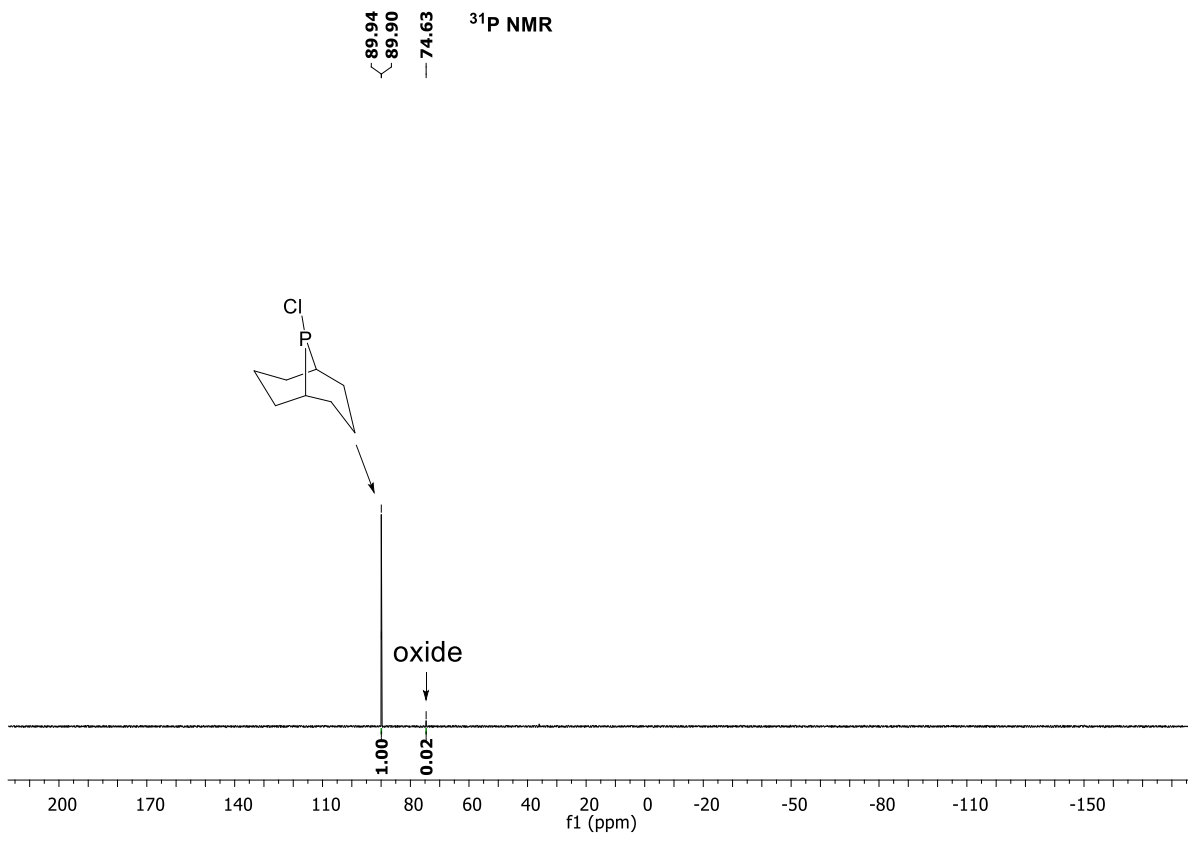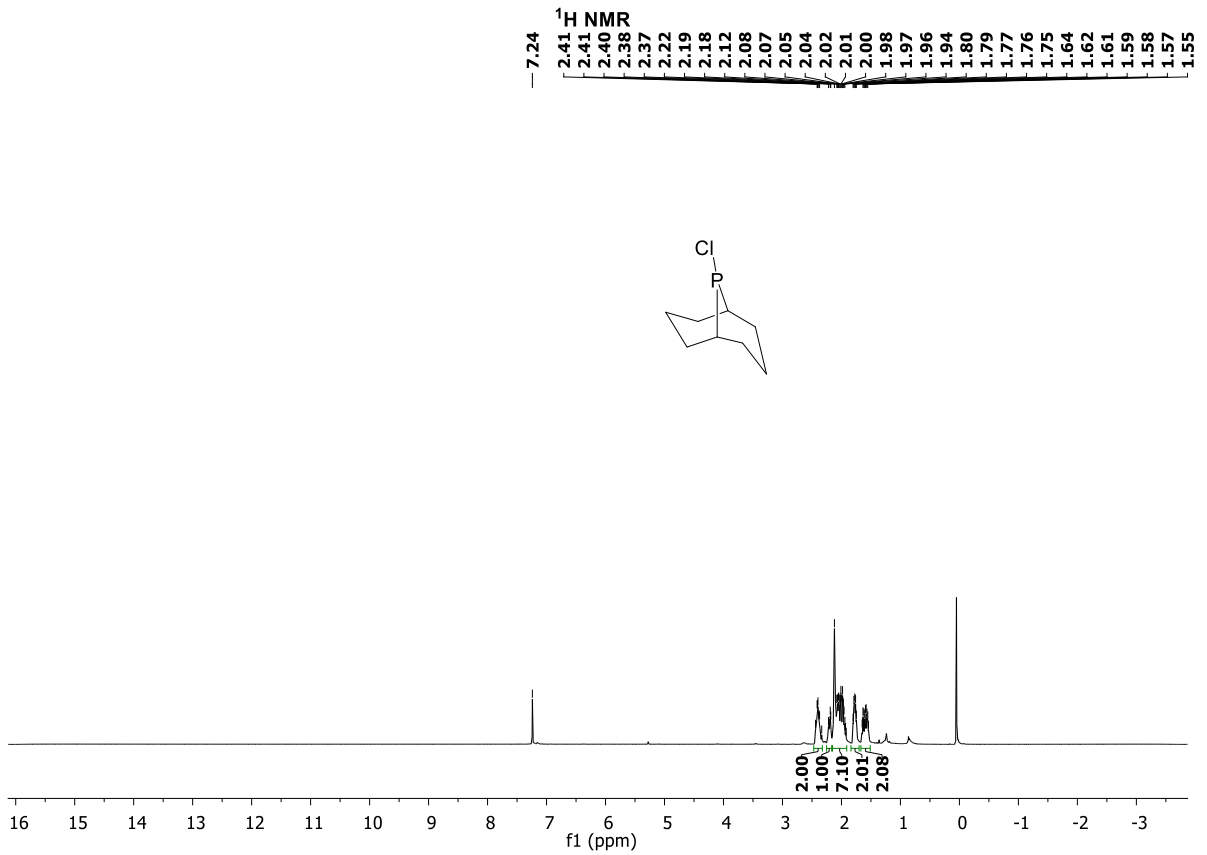



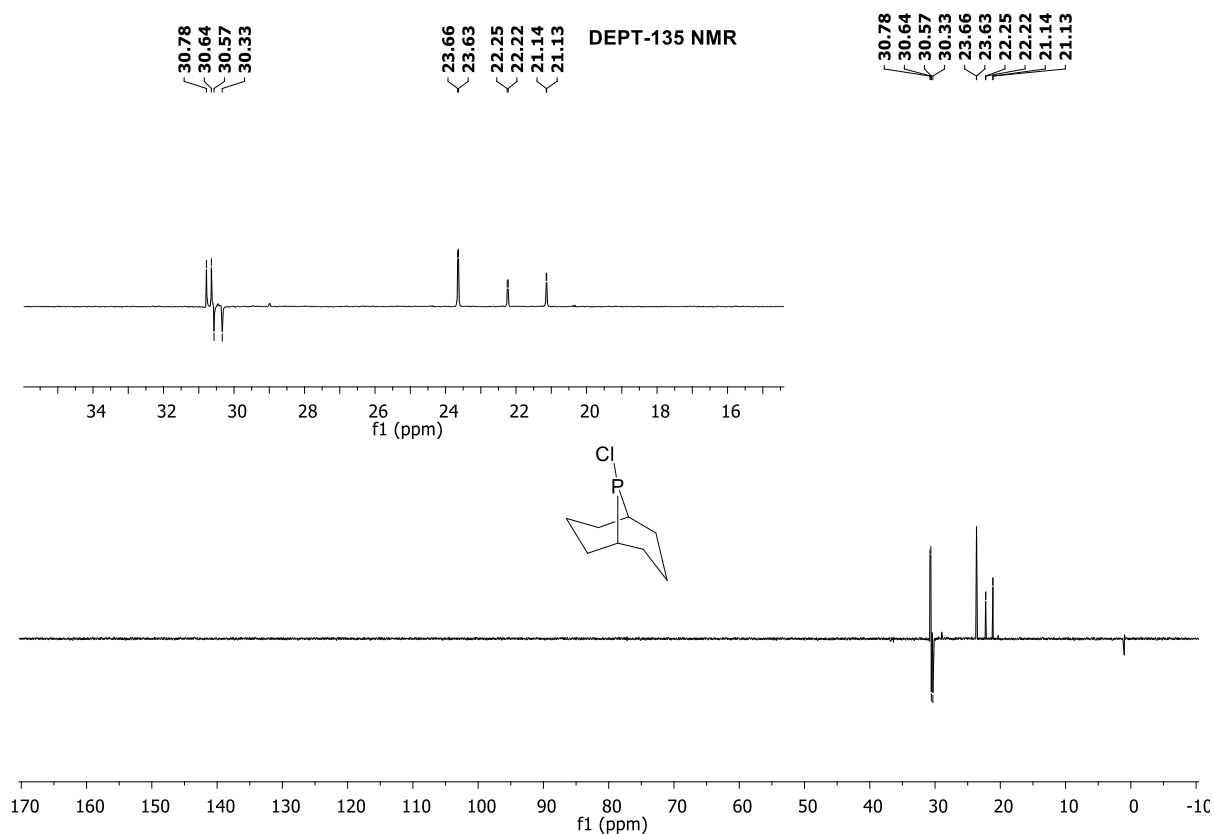

### Crystallographic Data

**Table S1:** Crystal data and refinement parameters for biaryl phosphacycles **1 – 4**.

|                   |                                                                                     |                                                                                     |                                                                                       |                                                                                       |
|-------------------|-------------------------------------------------------------------------------------|-------------------------------------------------------------------------------------|---------------------------------------------------------------------------------------|---------------------------------------------------------------------------------------|
| Crystal structure | 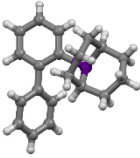 |  |  |  |
| Ligand            | <b>Ligand 1</b>                                                                     | <b>Ligand 2</b>                                                                     | <b>Ligand 3</b>                                                                       | <b>Ligand 4</b>                                                                       |
| CCDC no.          | 2051924                                                                             | 2051881                                                                             | 2051950                                                                               | 2051945                                                                               |
| Empirical formula | C <sub>20</sub> H <sub>23</sub> P                                                   | C <sub>44</sub> H <sub>54</sub> O <sub>4</sub> P <sub>2</sub>                       | C <sub>22</sub> H <sub>25</sub> O <sub>3</sub> P                                      | C <sub>24</sub> H <sub>30</sub> NO <sub>3</sub> P                                     |
| Formula weight    | 294.35                                                                              | 354.41                                                                              | 368.39                                                                                | 411.46                                                                                |
| Temperature/K     | 293(2)                                                                              | 149.99(10)                                                                          | 293(2)                                                                                | 296.15                                                                                |
| Crystal system    | monoclinic                                                                          | triclinic                                                                           | triclinic                                                                             | monoclinic                                                                            |
| Space group       | <i>P2/n</i>                                                                         | <i>P-1</i>                                                                          | <i>P-1</i>                                                                            | <i>C2/c</i>                                                                           |
| <i>a</i> /Å       | 14.554(2)                                                                           | 10.80490(10)                                                                        | 8.0873(7)                                                                             | 23.219(2)                                                                             |
| <i>b</i> /Å       | 7.2220(11)                                                                          | 13.8758(2)                                                                          | 9.4963(9)                                                                             | 8.4649(8)                                                                             |

|                                                |                                                                     |                                                                     |                                                                     |                                                                     |
|------------------------------------------------|---------------------------------------------------------------------|---------------------------------------------------------------------|---------------------------------------------------------------------|---------------------------------------------------------------------|
| c/Å                                            | 31.176(4)                                                           | 14.4304(2)                                                          | 13.1468(12)                                                         | 24.795(2)                                                           |
| $\alpha$ /°                                    | 90                                                                  | 62.5460(10)                                                         | 92.553(4)                                                           | 90                                                                  |
| $\beta$ /°                                     | 97.878(5)                                                           | 81.2320(10)                                                         | 105.035(4)                                                          | 110.975(2)                                                          |
| $\gamma$ /°                                    | 90                                                                  | 88.0550(10)                                                         | 95.537(4)                                                           | 90                                                                  |
| Volume/Å <sup>3</sup>                          | 3246.0(8)                                                           | 1895.79(4)                                                          | 968.01(15)                                                          | 4550.3(8)                                                           |
| Z                                              | 8                                                                   | 4                                                                   | 2                                                                   | 8                                                                   |
| $\rho_{\text{calc}}$ /cm <sup>3</sup>          | 1.205                                                               | 1.242                                                               | 1.264                                                               | 1.201                                                               |
| $\mu$ /mm <sup>-1</sup>                        | 0.161                                                               | 1.368                                                               | 0.160                                                               | 0.144                                                               |
| F(000)                                         | 1264.0                                                              | 760.0                                                               | 392.0                                                               | 1760.0                                                              |
| Crystal size/mm <sup>3</sup>                   | 0.225 × 0.212 ×<br>0.096                                            | 0.241 × 0.110 ×<br>0.091                                            | 0.321 × 0.285 ×<br>0.240                                            | 0.465 × 0.346 ×<br>0.281                                            |
| Radiation                                      | MoK $\alpha$ ( $\lambda$ =<br>0.71073)                              | CuK $\alpha$ ( $\lambda$ =<br>1.54184)                              | MoK $\alpha$ ( $\lambda$ =<br>0.71073)                              | MoK $\alpha$ ( $\lambda$ =<br>0.71073)                              |
| 2 $\theta$ range for data<br>collection/°      | 5.168 to 52.176                                                     | 6.986 to 144.258                                                    | 3.216 to 52.166                                                     | 3.518 to 52.518                                                     |
| Index ranges                                   | -18 ≤ h ≤ 17, -8 ≤ k<br>≤ 8, -38 ≤ l ≤ 38                           | -13 ≤ h ≤ 12, -17 ≤<br>k ≤ 17, -17 ≤ l ≤ 17                         | -9 ≤ h ≤ 9, -11 ≤ k ≤<br>11, -16 ≤ l ≤ 16                           | -28 ≤ h ≤ 28, -10 ≤<br>k ≤ 10, -30 ≤ l ≤ 30                         |
| Reflections<br>collected                       | 37990                                                               | 44733                                                               | 35452                                                               | 91270                                                               |
| Independent<br>reflections                     | 6384 [R <sub>int</sub> =<br>0.0476, R <sub>sigma</sub> =<br>0.0342] | 7445 [R <sub>int</sub> =<br>0.0406, R <sub>sigma</sub> =<br>0.0218] | 3831 [R <sub>int</sub> =<br>0.1041, R <sub>sigma</sub> =<br>0.0664] | 4612 [R <sub>int</sub> =<br>0.0480, R <sub>sigma</sub> =<br>0.0164] |
| Data/restraints/pa<br>rameters                 | 6384/0/379                                                          | 7445/0/455                                                          | 3831/0/239                                                          | 4612/0/268                                                          |
| Goodness-of-fit on<br>F <sup>2</sup>           | 1.062                                                               | 1.078                                                               | 1.058                                                               | 1.038                                                               |
| Final R indexes<br>[I >= 2 $\sigma$ (I)]       | R <sub>1</sub> = 0.0413, wR <sub>2</sub> =<br>0.0941                | R <sub>1</sub> = 0.0344, wR <sub>2</sub> =<br>0.0914                | R <sub>1</sub> = 0.0446, wR <sub>2</sub> =<br>0.1056                | R <sub>1</sub> = 0.0358, wR <sub>2</sub> =<br>0.0910                |
| Final R indexes [all<br>data]                  | R <sub>1</sub> = 0.0495, wR <sub>2</sub> =<br>0.0980                | R <sub>1</sub> = 0.0366, wR <sub>2</sub> =<br>0.0932                | R <sub>1</sub> = 0.0624, wR <sub>2</sub> =<br>0.1138                | R <sub>1</sub> = 0.0438, wR <sub>2</sub> =<br>0.0971                |
| Largest diff.<br>peak/hole / e Å <sup>-3</sup> | 0.63/-0.22                                                          | 0.33/-0.34                                                          | 0.45/-0.29                                                          | 0.17/-0.24                                                          |

**Table S2:** Ellipsoid plots for ligands 1 – 4, from checkCIF/PLATON (50% probability displacement ellipsoids).

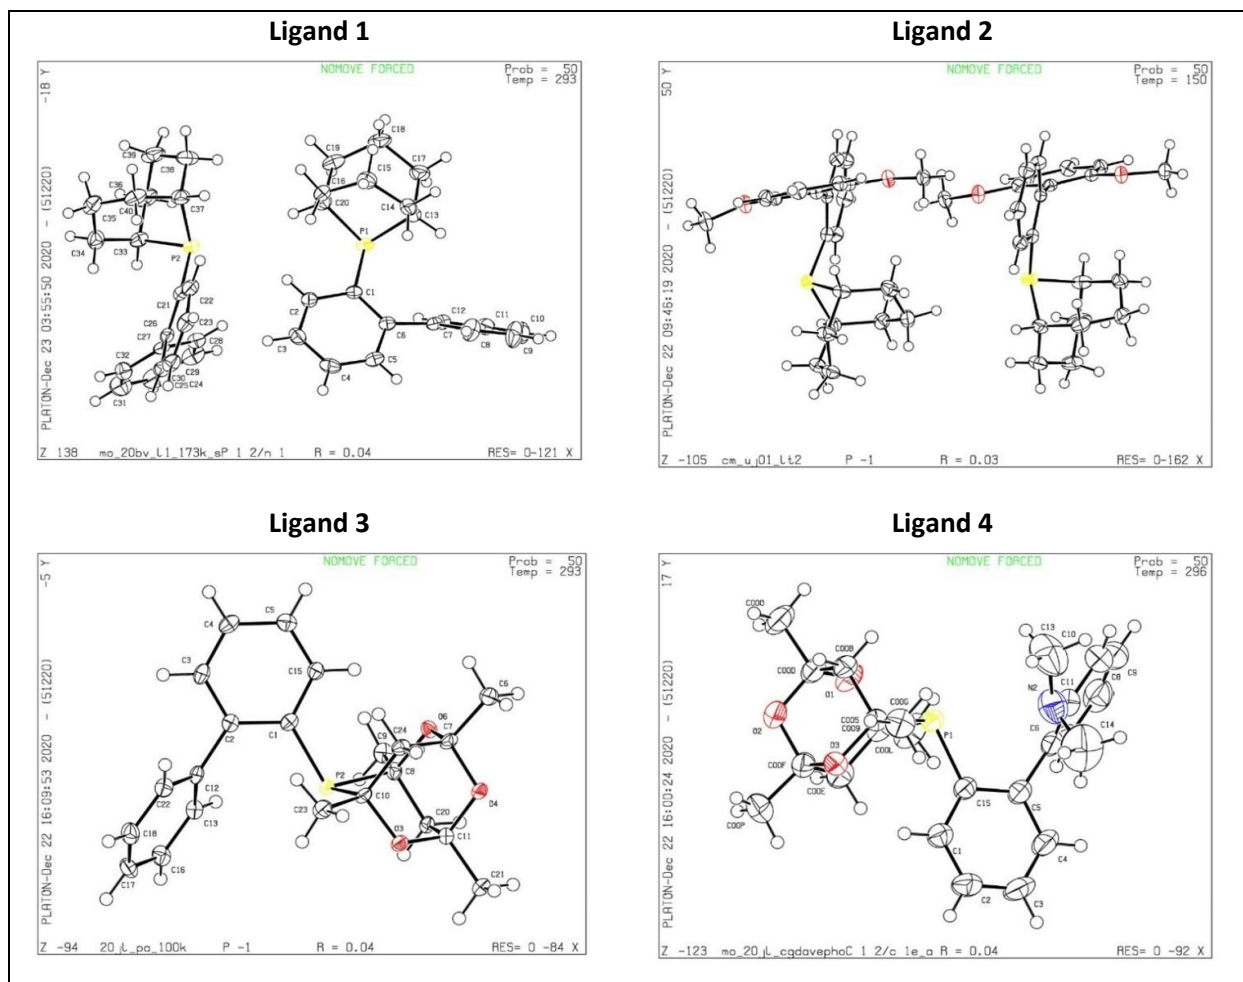

### Ligand 1

**Fractional Atomic Coordinates ( $\times 10^4$ ) and Equivalent Isotropic Displacement Parameters ( $\text{\AA}^2 \times 10^3$ ) for mo\_20bv\_L1\_173K\_solve\_a.  $U_{eq}$  is defined as 1/3 of the trace of the orthogonalised  $U_{ij}$  tensor.**

| Atom | x           | y         | z         | $U_{eq}$  |
|------|-------------|-----------|-----------|-----------|
| P1   | 16.8(3)     | 4603.2(6) | 3623.4(2) | 22.32(11) |
| P2   | 2510.6(3)   | 9507.9(6) | 4239.7(2) | 23.60(11) |
| C13  | -1270.4(12) | 4619(2)   | 3509.3(5) | 26.2(4)   |

|     |             |          |           |         |
|-----|-------------|----------|-----------|---------|
| C6  | 174.7(11)   | 5123(2)  | 2721.9(5) | 19.8(3) |
| C12 | -204.5(11)  | 1760(2)  | 2782.0(5) | 22.9(3) |
| C1  | 431.5(11)   | 5718(2)  | 3154.7(5) | 19.5(3) |
| C26 | 3700.0(11)  | 10119(2) | 3588.7(5) | 20.9(3) |
| C7  | -420.1(11)  | 3483(2)  | 2593.9(5) | 20.6(3) |
| C21 | 2901.2(11)  | 10659(2) | 3769.7(5) | 20.8(3) |
| C2  | 1109.7(11)  | 7104(2)  | 3234.6(6) | 24.9(4) |
| C28 | 3914.8(12)  | 6767(2)  | 3785.8(5) | 26.3(4) |
| C3  | 1507.8(12)  | 7924(2)  | 2903.3(6) | 28.9(4) |
| C25 | 3917.0(12)  | 11040(2) | 3220.1(5) | 25.0(4) |
| C32 | 5267.7(12)  | 8683(3)  | 3814.4(6) | 31.3(4) |
| C5  | 563.5(12)   | 6028(2)  | 2391.8(5) | 24.7(4) |
| C33 | 3510.2(12)  | 9597(2)  | 4680.8(5) | 26.2(4) |
| C29 | 4472.9(14)  | 5238(3)  | 3895.3(6) | 35.4(4) |
| C24 | 3341.2(13)  | 12388(2) | 3012.5(5) | 29.0(4) |
| C23 | 2540.0(13)  | 12870(2) | 3178.2(6) | 29.9(4) |
| C4  | 1224.3(12)  | 7395(2)  | 2479.0(6) | 28.5(4) |
| C27 | 4301.1(11)  | 8518(2)  | 3746.2(5) | 21.8(3) |
| C14 | -1675.1(12) | 6506(3)  | 3354.4(6) | 30.1(4) |
| C20 | 61.0(12)    | 6470(2)  | 4036.8(5) | 25.9(4) |
| C17 | -1612.8(14) | 3851(3)  | 3922.3(6) | 36.6(5) |
| C22 | 2329.5(12)  | 12028(2) | 3551.5(5) | 26.9(4) |
| C16 | -424.8(12)  | 8276(2)  | 3875.4(6) | 28.0(4) |
| C8  | -1145.5(13) | 3582(3)  | 2250.0(6) | 35.1(4) |
| C34 | 3957.7(12)  | 11519(3) | 4738.3(6) | 31.2(4) |
| C37 | 1848.1(12)  | 11328(3) | 4488.0(6) | 30.7(4) |
| C11 | -697.0(12)  | 190(2)   | 2634.6(6) | 28.7(4) |

|     |             |          |           |         |
|-----|-------------|----------|-----------|---------|
| C38 | 1556.2(14)  | 10402(3) | 4895.5(7) | 41.8(5) |
| C18 | -1338.8(15) | 4955(3)  | 4342.0(6) | 37.8(5) |
| C10 | -1413.9(13) | 312(3)   | 2295.2(7) | 38.9(5) |
| C36 | 2358.2(13)  | 13177(3) | 4572.2(6) | 33.3(4) |
| C19 | -318.9(14)  | 5559(3)  | 4424.1(6) | 34.9(4) |
| C39 | 2353.6(16)  | 9877(3)  | 5248.1(6) | 41.4(5) |
| C15 | -1441.9(12) | 8143(3)  | 3664.3(6) | 31.6(4) |
| C30 | 5428.2(15)  | 5425(3)  | 3965.4(7) | 42.8(5) |
| C31 | 5822.8(14)  | 7136(3)  | 3923.5(7) | 42.3(5) |
| C35 | 3330.5(14)  | 13123(3) | 4837.7(6) | 33.7(4) |
| C40 | 3151.1(15)  | 8809(3)  | 5088.6(6) | 37.4(5) |
| C9  | -1635.2(14) | 2009(3)  | 2103.4(7) | 46.4(5) |

**Anisotropic Displacement Parameters ( $\text{\AA}^2 \times 10^3$ ) for mo\_20bv\_L1\_173K\_solve\_a. The Anisotropic displacement factor exponent takes the form:  $-2\pi^2[h^2a^*U_{11}+2hka^*b^*U_{12}+\dots]$ .**

| Atom | $U_{11}$ | $U_{22}$ | $U_{33}$ | $U_{23}$  | $U_{13}$ | $U_{12}$  |
|------|----------|----------|----------|-----------|----------|-----------|
| P1   | 27.4(2)  | 23.3(2)  | 17.1(2)  | 0.55(17)  | 5.86(16) | 2.18(18)  |
| P2   | 24.5(2)  | 27.1(2)  | 20.2(2)  | -3.27(18) | 6.48(17) | -1.29(18) |
| C13  | 27.8(9)  | 28.7(9)  | 23.5(8)  | -6.9(7)   | 8.8(7)   | -8.3(7)   |
| C6   | 22.5(8)  | 16.7(8)  | 20.7(8)  | 0.8(6)    | 4.9(6)   | 4.7(6)    |
| C12  | 24.5(8)  | 24.2(8)  | 20.4(8)  | -0.5(7)   | 4.1(6)   | 1.2(7)    |
| C1   | 20.5(8)  | 19.4(8)  | 19.5(8)  | 0.3(6)    | 5.4(6)   | 3.7(6)    |
| C26  | 23.6(8)  | 18.7(8)  | 20.2(8)  | -4.5(6)   | 1.9(6)   | -2.7(6)   |
| C7   | 22.1(8)  | 23.3(8)  | 16.9(7)  | -1.9(6)   | 4.7(6)   | 2.9(6)    |
| C21  | 22.6(8)  | 21.4(8)  | 17.8(8)  | -3.7(6)   | 1.4(6)   | -1.1(6)   |
| C2   | 21.8(8)  | 25.8(9)  | 27.4(9)  | -5.7(7)   | 4.6(7)   | 1.4(7)    |
| C28  | 31.1(9)  | 25.7(9)  | 22.8(8)  | -0.7(7)   | 6.3(7)   | 1.7(7)    |
| C3   | 24.6(9)  | 23.8(9)  | 39.9(10) | -3.0(8)   | 10.6(8)  | -2.9(7)   |

|     |          |          |          |           |         |          |
|-----|----------|----------|----------|-----------|---------|----------|
| C25 | 28.5(9)  | 23.4(8)  | 24.1(8)  | -2.6(7)   | 6.7(7)  | -3.6(7)  |
| C32 | 26.5(9)  | 35.6(10) | 31.2(9)  | -3.6(8)   | 2.3(7)  | -0.4(8)  |
| C5  | 32.8(9)  | 22.9(8)  | 19.1(8)  | 1.8(7)    | 6.4(7)  | 5.9(7)   |
| C33 | 31.6(9)  | 28.6(9)  | 18.2(8)  | -0.4(7)   | 2.5(7)  | 4.3(7)   |
| C29 | 52.2(12) | 26.1(9)  | 28.3(9)  | 2.4(8)    | 6.7(9)  | 7.3(9)   |
| C24 | 41.8(10) | 24.2(9)  | 20.9(8)  | 2.3(7)    | 3.4(7)  | -4.8(8)  |
| C23 | 38.1(10) | 24.5(9)  | 24.5(9)  | 0.2(7)    | -5.6(7) | 5.3(8)   |
| C4  | 33.8(9)  | 23.4(9)  | 31.7(9)  | 6.8(7)    | 16.4(8) | 3.3(7)   |
| C27 | 25.0(8)  | 25.6(8)  | 15.2(7)  | -3.6(6)   | 4.6(6)  | 3.1(7)   |
| C14 | 21.4(8)  | 39.6(10) | 29.0(9)  | -1.9(8)   | 2.7(7)  | -0.6(8)  |
| C20 | 27.0(9)  | 31.3(9)  | 19.2(8)  | -4.5(7)   | 2.6(7)  | 0.9(7)   |
| C17 | 44.9(11) | 34.0(10) | 35.6(10) | -4.1(8)   | 21.8(9) | -10.7(9) |
| C22 | 26.1(9)  | 29.6(9)  | 23.8(8)  | -5.9(7)   | -1.0(7) | 5.1(7)   |
| C16 | 30.8(9)  | 26.7(9)  | 27.2(9)  | -7.4(7)   | 6.3(7)  | -1.5(7)  |
| C8  | 35.7(10) | 30.1(10) | 35.8(10) | 0.9(8)    | -8.0(8) | 5.8(8)   |
| C34 | 29.9(9)  | 35.9(10) | 25.9(9)  | 0.7(8)    | -3.0(7) | -2.7(8)  |
| C37 | 26.2(9)  | 38.8(10) | 28.1(9)  | -5.9(8)   | 7.3(7)  | 5.4(8)   |
| C11 | 31.8(9)  | 22.6(9)  | 33.6(10) | -1.6(7)   | 10.7(8) | -0.7(7)  |
| C38 | 43.7(12) | 47.9(12) | 39.1(11) | -10.0(10) | 24.1(9) | -3.8(10) |
| C18 | 54.0(12) | 37.6(11) | 26.4(9)  | -0.9(8)   | 21.7(9) | -3.6(9)  |
| C10 | 30.8(10) | 34.8(10) | 49.7(12) | -12.6(9)  | 0.5(9)  | -5.9(8)  |
| C36 | 44.1(11) | 29.9(10) | 26.7(9)  | -4.8(8)   | 7.1(8)  | 9.5(8)   |
| C19 | 47.5(11) | 39.9(11) | 18.3(8)  | -1.2(8)   | 8.5(8)  | 5.4(9)   |
| C39 | 63.8(14) | 39.5(11) | 25.1(10) | -1.8(8)   | 21.4(9) | -7.0(10) |
| C15 | 30.2(9)  | 29.9(9)  | 35.2(10) | -1.3(8)   | 6.9(8)  | 5.3(8)   |
| C30 | 50.4(13) | 40.8(12) | 35.6(11) | 1.7(9)    | -0.3(9) | 21.8(10) |
| C31 | 27.2(10) | 57.4(14) | 40.4(11) | -4.9(10)  | -1.5(8) | 14.0(9)  |

|     |          |          |          |          |          |         |
|-----|----------|----------|----------|----------|----------|---------|
| C35 | 46.2(11) | 27.9(9)  | 26.6(9)  | -4.6(8)  | 3.6(8)   | -3.9(8) |
| C40 | 58.0(13) | 31.9(10) | 22.9(9)  | 3.2(8)   | 8.0(9)   | 1.3(9)  |
| C9  | 34.9(11) | 47.2(12) | 50.6(13) | -9.5(10) | -18.3(9) | 1.7(10) |

**Bond Lengths for mo\_20bv\_L1\_173K\_solve\_a.**

| Atom Atom Length/Å |     |            | Atom Atom Length/Å |     |          |
|--------------------|-----|------------|--------------------|-----|----------|
| P1                 | C13 | 1.8583(18) | C32                | C27 | 1.399(2) |
| P1                 | C1  | 1.8410(16) | C32                | C31 | 1.393(3) |
| P1                 | C20 | 1.8600(17) | C5                 | C4  | 1.379(2) |
| P2                 | C21 | 1.8411(17) | C33                | C34 | 1.533(2) |
| P2                 | C33 | 1.8611(17) | C33                | C40 | 1.548(2) |
| P2                 | C37 | 1.8604(18) | C29                | C30 | 1.384(3) |
| C13                | C14 | 1.536(3)   | C24                | C23 | 1.383(3) |
| C13                | C17 | 1.546(2)   | C23                | C22 | 1.384(2) |
| C6                 | C1  | 1.417(2)   | C14                | C15 | 1.535(3) |
| C6                 | C7  | 1.489(2)   | C20                | C16 | 1.535(2) |
| C6                 | C5  | 1.402(2)   | C20                | C19 | 1.543(2) |
| C12                | C7  | 1.393(2)   | C17                | C18 | 1.537(3) |
| C12                | C11 | 1.386(2)   | C16                | C15 | 1.538(2) |
| C1                 | C2  | 1.404(2)   | C8                 | C9  | 1.384(3) |
| C26                | C21 | 1.415(2)   | C34                | C35 | 1.533(3) |
| C26                | C25 | 1.401(2)   | C37                | C38 | 1.546(3) |
| C26                | C27 | 1.492(2)   | C37                | C36 | 1.533(3) |
| C7                 | C8  | 1.400(2)   | C11                | C10 | 1.383(3) |
| C21                | C22 | 1.406(2)   | C38                | C39 | 1.533(3) |
| C2                 | C3  | 1.384(2)   | C18                | C19 | 1.535(3) |
| C28                | C29 | 1.386(2)   | C10                | C9  | 1.383(3) |

|     |     |          |     |     |          |
|-----|-----|----------|-----|-----|----------|
| C28 | C27 | 1.397(2) | C36 | C35 | 1.539(3) |
| C3  | C4  | 1.384(3) | C39 | C40 | 1.532(3) |
| C25 | C24 | 1.386(2) | C30 | C31 | 1.376(3) |

**Bond Angles for mo\_20bv\_L1\_173K\_solve\_a.**

| Atom Atom Atom Angle/° |     |     |            | Atom Atom Atom Angle/° |     |     |            |
|------------------------|-----|-----|------------|------------------------|-----|-----|------------|
| C13                    | P1  | C20 | 93.81(8)   | C40                    | C33 | P2  | 106.05(13) |
| C1                     | P1  | C13 | 106.08(7)  | C30                    | C29 | C28 | 120.22(19) |
| C1                     | P1  | C20 | 104.42(8)  | C23                    | C24 | C25 | 119.28(16) |
| C21                    | P2  | C33 | 106.08(8)  | C24                    | C23 | C22 | 119.92(16) |
| C21                    | P2  | C37 | 104.25(8)  | C5                     | C4  | C3  | 119.64(16) |
| C37                    | P2  | C33 | 93.74(8)   | C28                    | C27 | C26 | 120.39(15) |
| C14                    | C13 | P1  | 113.50(12) | C28                    | C27 | C32 | 118.18(16) |
| C14                    | C13 | C17 | 115.26(15) | C32                    | C27 | C26 | 121.10(15) |
| C17                    | C13 | P1  | 105.66(13) | C15                    | C14 | C13 | 116.31(14) |
| C1                     | C6  | C7  | 124.34(14) | C16                    | C20 | P1  | 114.72(11) |
| C5                     | C6  | C1  | 118.51(15) | C16                    | C20 | C19 | 114.87(14) |
| C5                     | C6  | C7  | 116.92(14) | C19                    | C20 | P1  | 104.54(12) |
| C11                    | C12 | C7  | 121.00(15) | C18                    | C17 | C13 | 116.57(15) |
| C6                     | C1  | P1  | 123.44(12) | C23                    | C22 | C21 | 122.08(16) |
| C2                     | C1  | P1  | 118.04(12) | C20                    | C16 | C15 | 117.37(15) |
| C2                     | C1  | C6  | 118.19(14) | C9                     | C8  | C7  | 120.76(18) |
| C21                    | C26 | C27 | 124.02(14) | C35                    | C34 | C33 | 116.92(15) |
| C25                    | C26 | C21 | 119.09(15) | C38                    | C37 | P2  | 104.65(13) |
| C25                    | C26 | C27 | 116.74(14) | C36                    | C37 | P2  | 114.86(12) |
| C12                    | C7  | C6  | 120.58(14) | C36                    | C37 | C38 | 114.66(15) |
| C12                    | C7  | C8  | 118.07(16) | C10                    | C11 | C12 | 120.20(17) |



|     |     |     |            |     |     |     |            |
|-----|-----|-----|------------|-----|-----|-----|------------|
| C8  | C7  | C6  | 120.98(15) | C39 | C38 | C37 | 115.47(16) |
| C26 | C21 | P2  | 123.57(12) | C19 | C18 | C17 | 114.94(15) |
| C22 | C21 | P2  | 118.41(12) | C9  | C10 | C11 | 119.59(18) |
| C22 | C21 | C26 | 117.71(15) | C37 | C36 | C35 | 117.26(15) |
| C3  | C2  | C1  | 121.92(16) | C18 | C19 | C20 | 115.65(15) |
| C29 | C28 | C27 | 120.94(17) | C40 | C39 | C38 | 115.13(16) |
| C2  | C3  | C4  | 119.63(16) | C14 | C15 | C16 | 115.74(14) |
| C24 | C25 | C26 | 121.79(16) | C31 | C30 | C29 | 119.73(18) |
| C31 | C32 | C27 | 120.43(18) | C30 | C31 | C32 | 120.50(18) |
| C4  | C5  | C6  | 121.98(16) | C34 | C35 | C36 | 116.08(15) |
| C34 | C33 | P2  | 113.22(12) | C39 | C40 | C33 | 115.95(16) |
| C34 | C33 | C40 | 115.00(15) | C10 | C9  | C8  | 120.37(18) |

**Torsion Angles for mo\_20bv\_L1\_173K\_solve\_a.**

| A   | B   | C   | D   | Angle/°     | A   | B   | C   | D   | Angle/°     |
|-----|-----|-----|-----|-------------|-----|-----|-----|-----|-------------|
| P1  | C13 | C14 | C15 | -59.07(18)  | C25 | C26 | C27 | C28 | -122.49(17) |
| P1  | C13 | C17 | C18 | 61.0(2)     | C25 | C26 | C27 | C32 | 50.8(2)     |
| P1  | C1  | C2  | C3  | 175.40(13)  | C25 | C24 | C23 | C22 | 1.1(3)      |
| P1  | C20 | C16 | C15 | 54.01(18)   | C5  | C6  | C1  | P1  | -177.40(12) |
| P1  | C20 | C19 | C18 | -64.81(18)  | C5  | C6  | C1  | C2  | -4.1(2)     |
| P2  | C21 | C22 | C23 | -175.47(13) | C5  | C6  | C7  | C12 | 121.83(17)  |
| P2  | C33 | C34 | C35 | 58.36(18)   | C5  | C6  | C7  | C8  | -51.0(2)    |
| P2  | C33 | C40 | C39 | -61.37(19)  | C33 | P2  | C21 | C26 | 55.74(15)   |
| P2  | C37 | C38 | C39 | 64.95(19)   | C33 | P2  | C21 | C22 | -130.80(13) |
| P2  | C37 | C36 | C35 | -53.7(2)    | C33 | P2  | C37 | C38 | -69.78(13)  |
| C13 | P1  | C1  | C6  | -54.94(15)  | C33 | P2  | C37 | C36 | 56.84(14)   |
| C13 | P1  | C1  | C2  | 131.79(13)  | C33 | C34 | C35 | C36 | -43.2(2)    |

|                            |                             |
|----------------------------|-----------------------------|
| C13 P1 C20 C16 -56.32(13)  | C29 C28 C27 C26 174.34(15)  |
| C13 P1 C20 C19 70.38(13)   | C29 C28 C27 C32 0.8(2)      |
| C13 C14 C15 C16 44.5(2)    | C29 C30 C31 C32 0.5(3)      |
| C13 C17 C18 C19 -45.7(3)   | C24 C23 C22 C21 -0.9(3)     |
| C6 C1 C2 C3 1.8(2)         | C27 C26 C21 P2 2.2(2)       |
| C6 C7 C8 C9 173.29(18)     | C27 C26 C21 C22 -171.31(15) |
| C6 C5 C4 C3 -1.1(3)        | C27 C26 C25 C24 171.64(15)  |
| C12 C7 C8 C9 0.3(3)        | C27 C28 C29 C30 -0.3(3)     |
| C12 C11 C10 C9 0.1(3)      | C27 C32 C31 C30 0.0(3)      |
| C1 P1 C13 C14 -47.57(13)   | C14 C13 C17 C18 -65.2(2)    |
| C1 P1 C13 C17 -174.80(11)  | C20 P1 C13 C14 58.63(13)    |
| C1 P1 C20 C16 51.36(14)    | C20 P1 C13 C17 -68.61(13)   |
| C1 P1 C20 C19 178.07(11)   | C20 P1 C1 C6 -153.31(13)    |
| C1 C6 C7 C12 -52.6(2)      | C20 P1 C1 C2 33.42(14)      |
| C1 C6 C7 C8 134.56(18)     | C20 C16 C15 C14 -41.9(2)    |
| C1 C6 C5 C4 3.9(2)         | C17 C13 C14 C15 63.0(2)     |
| C1 C2 C3 C4 1.1(3)         | C17 C18 C19 C20 47.8(2)     |
| C26 C21 C22 C23 -1.6(2)    | C16 C20 C19 C18 61.8(2)     |
| C26 C25 C24 C23 1.4(3)     | C34 C33 C40 C39 64.6(2)     |
| C7 C6 C1 P1 -3.1(2)        | C37 P2 C21 C26 153.98(14)   |
| C7 C6 C1 C2 170.20(14)     | C37 P2 C21 C22 -32.56(15)   |
| C7 C6 C5 C4 -170.87(15)    | C37 P2 C33 C34 -58.59(14)   |
| C7 C12 C11 C10 0.2(3)      | C37 P2 C33 C40 68.43(13)    |
| C7 C8 C9 C10 0.0(3)        | C37 C38 C39 C40 -48.9(2)    |
| C21 P2 C33 C34 47.41(14)   | C37 C36 C35 C34 40.5(2)     |
| C21 P2 C33 C40 174.43(12)  | C11 C12 C7 C6 -173.40(15)   |
| C21 P2 C37 C38 -177.41(12) | C11 C12 C7 C8 -0.3(2)       |

|                             |                             |
|-----------------------------|-----------------------------|
| C21 P2 C37 C36 -50.80(15)   | C11 C10 C9 C8 -0.2(3)       |
| C21 C26 C25 C24 -4.0(2)     | C38 C37 C36 C35 67.6(2)     |
| C21 C26 C27 C28 52.9(2)     | C38 C39 C40 C33 46.7(2)     |
| C21 C26 C27 C32 -133.79(17) | C36 C37 C38 C39 -61.8(2)    |
| C2 C3 C4 C5 -1.5(3)         | C19 C20 C16 C15 -67.2(2)    |
| C28 C29 C30 C31 -0.4(3)     | C31 C32 C27 C26 -174.15(16) |
| C25 C26 C21 P2 177.49(12)   | C31 C32 C27 C28 -0.7(3)     |
| C25 C26 C21 C22 4.0(2)      | C40 C33 C34 C35 -63.8(2)    |

**Hydrogen Atom Coordinates ( $\text{\AA}\times 10^4$ ) and Isotropic Displacement Parameters ( $\text{\AA}^2\times 10^3$ ) for mo\_20bv\_L1\_173K\_solve\_a.**

| Atom | x        | y        | z       | U(eq) |
|------|----------|----------|---------|-------|
| H13  | -1450.43 | 3726.57  | 3276.09 | 31    |
| H12  | 277.21   | 1662.15  | 3009.96 | 28    |
| H2   | 1296.96  | 7482.43  | 3518.21 | 30    |
| H28  | 3273.82  | 6624.68  | 3737.98 | 32    |
| H3   | 1963.24  | 8824.41  | 2965.55 | 35    |
| H25  | 4462.35  | 10738.71 | 3111.78 | 30    |
| H32  | 5541.65  | 9832.21  | 3786.7  | 38    |
| H5   | 369.94   | 5696.9   | 2105.37 | 30    |
| H33  | 3982.74  | 8740.89  | 4602.88 | 31    |
| H29  | 4204.75  | 4081.74  | 3921.75 | 42    |
| H24  | 3491.9   | 12963.04 | 2764.49 | 35    |
| H23  | 2143.05  | 13757.78 | 3038.92 | 36    |
| H4   | 1478.03  | 7958.49  | 2254.08 | 34    |
| H14A | -1457.83 | 6799.58  | 3081.76 | 36    |
| H14B | -2344.63 | 6388.61  | 3297.3  | 36    |
| H20  | 715.77   | 6761.45  | 4129.3  | 31    |

|               |          |         |    |
|---------------|----------|---------|----|
| H17A -2284.23 | 3774.7   | 3869.57 | 44 |
| H17B -1378.5  | 2599.27  | 3968.67 | 44 |
| H22 1792.95   | 12378.66 | 3661.48 | 32 |
| H16A -70.47   | 8833.16  | 3667.14 | 34 |
| H16B -397.41  | 9118.51  | 4119.21 | 34 |
| H8 -1300.39   | 4716.16  | 2118.51 | 42 |
| H34A 4472.15  | 11446.14 | 4971.05 | 37 |
| H34B 4213.92  | 11819.89 | 4475.6  | 37 |
| H37 1281.37   | 11569.67 | 4287.43 | 37 |
| H11 -545.02   | -949.68  | 2764.34 | 34 |
| H38A 1143.47  | 11237.79 | 5020.36 | 50 |
| H38B 1206.65  | 9290.7   | 4806.66 | 50 |
| H18A -1726.31 | 6050.39  | 4333.55 | 45 |
| H18B -1469.9  | 4204.35  | 4584.46 | 45 |
| H10 -1745.07  | -741.92  | 2196.62 | 47 |
| H36A 1972.59  | 13987.44 | 4720.18 | 40 |
| H36B 2413.08  | 13739.39 | 4294.28 | 40 |
| H19A 57.71    | 4481.14  | 4512.39 | 42 |
| H19B -244.64  | 6425.08  | 4664.22 | 42 |
| H39A 2601.98  | 11001.09 | 5389.49 | 50 |
| H39B 2104.85  | 9130.83  | 5463.95 | 50 |
| H15A -1831.35 | 8063.13  | 3892.41 | 38 |
| H15B -1602.15 | 9280.04  | 3505.96 | 38 |
| H30 5801.86   | 4398.78  | 4040.48 | 51 |
| H31 6464.81   | 7260.58  | 3968.36 | 51 |
| H35A 3643.51  | 14276.65 | 4790.75 | 40 |
| H35B 3258.99  | 13068.05 | 5142.25 | 40 |

|      |          |         |         |    |
|------|----------|---------|---------|----|
| H40A | 2948.99  | 7544.52 | 5028.09 | 45 |
| H40B | 3665.66  | 8767.48 | 5321.78 | 45 |
| H9   | -2115.62 | 2095.81 | 1874.57 | 56 |

### Ligand 2

**Fractional Atomic Coordinates ( $\times 10^4$ ) and Equivalent Isotropic Displacement Parameters ( $\text{\AA}^2 \times 10^3$ ) for CM\_UJ01\_LT2.  $U_{\text{eq}}$  is defined as 1/3 of of the trace of the orthogonalised  $U_{ij}$  tensor.**

| Atom | x          | y          | z          | U(eq)     |
|------|------------|------------|------------|-----------|
| P1   | 2729.6(3)  | 2226.1(3)  | 1955.5(2)  | 21.83(9)  |
| P26  | 2187.1(3)  | 7194.9(3)  | 2178.9(3)  | 24.27(9)  |
| O21  | 4915.5(8)  | 492.8(7)   | 2938.1(7)  | 25.5(2)   |
| O44  | 2901.0(8)  | 4922.2(7)  | 4261.1(7)  | 25.5(2)   |
| O46  | 3150.2(8)  | 8123.3(7)  | 4551.6(7)  | 24.00(19) |
| O19  | 5142.5(8)  | 3590.3(7)  | 3413.6(7)  | 24.21(19) |
| C14  | 5711.8(11) | 3014.4(10) | 2927.0(9)  | 20.4(2)   |
| C38  | 2972.3(11) | 6521.8(10) | 4415.5(9)  | 19.2(2)   |
| C32  | 4007.3(11) | 6948.7(9)  | 3496.6(10) | 19.6(2)   |
| C13  | 5046.0(11) | 2071.6(10) | 3125.7(9)  | 19.9(2)   |
| C39  | 2401.5(11) | 5494.5(10) | 4774.8(10) | 20.3(2)   |
| C18  | 5582.5(11) | 1430.6(10) | 2664.4(10) | 21.3(2)   |
| C12  | 2683.3(11) | 1873.1(9)  | 3359.0(10) | 20.7(2)   |
| C7   | 3787.9(11) | 1771.2(9)  | 3799.8(10) | 20.2(2)   |
| C43  | 2543.9(11) | 7138.0(10) | 4936.4(9)  | 19.8(2)   |
| C11  | 1542.4(12) | 1536.8(10) | 4051.1(10) | 24.9(3)   |
| C37  | 3770.8(11) | 7310.1(10) | 2457.2(10) | 20.4(2)   |
| C36  | 4799.7(12) | 7616.6(11) | 1646.1(10) | 25.3(3)   |
| C17  | 6723.6(12) | 1742.0(11) | 1987.4(10) | 25.8(3)   |
| C42  | 1556.7(12) | 6749.2(10) | 5777.5(10) | 23.1(3)   |
| C8   | 3720.7(12) | 1376.9(10) | 4889.3(10) | 24.0(3)   |

|     |            |            |            |         |
|-----|------------|------------|------------|---------|
| C35 | 6016.9(12) | 7599.9(11) | 1844.2(11) | 28.2(3) |
| C40 | 1407.3(12) | 5103.0(10) | 5604.7(10) | 24.1(3) |
| C33 | 5235.8(12) | 6953.1(10) | 3685.5(10) | 24.6(3) |
| C2  | 3565.0(12) | 3576.7(11) | 1139.0(10) | 24.9(3) |
| C41 | 1002.2(12) | 5734.7(11) | 6098.6(10) | 25.0(3) |
| C10 | 1487.9(13) | 1137.0(11) | 5134.7(11) | 28.5(3) |
| C34 | 6235.2(12) | 7277.0(11) | 2866.0(11) | 28.1(3) |
| C15 | 6859.4(12) | 3327.4(10) | 2262.6(10) | 24.2(3) |
| C9  | 2576.7(13) | 1058.8(11) | 5555.2(10) | 28.2(3) |
| C31 | 2225.0(13) | 8232.7(11) | 774.9(10)  | 27.0(3) |
| C6  | 1166.7(12) | 2784.6(10) | 1653.8(10) | 23.8(3) |
| C20 | 5656.8(12) | 4654.8(10) | 3094.5(11) | 25.6(3) |
| C25 | 3472.4(13) | 3861.4(13) | -17.5(10)  | 30.8(3) |
| C5  | 821.0(12)  | 3717.1(11) | 1928.2(11) | 27.3(3) |
| C16 | 7345.2(12) | 2690.2(11) | 1794.4(11) | 27.6(3) |
| C45 | 2272.7(13) | 3922.0(11) | 4518.2(11) | 27.7(3) |
| C47 | 2623.4(13) | 8857.1(11) | 4935.9(11) | 27.5(3) |
| C30 | 2664.6(13) | 9382.8(11) | 514.8(11)  | 30.4(3) |
| C3  | 3109.1(13) | 4447.2(11) | 1466.6(11) | 29.3(3) |
| C23 | 1175.5(13) | 3073.7(11) | 485.3(11)  | 28.9(3) |
| C24 | 2145.8(13) | 3959.9(12) | -314.3(10) | 29.6(3) |
| C4  | 1729.3(13) | 4714.5(11) | 1417.9(11) | 29.6(3) |
| C27 | 1137.3(12) | 7992.8(12) | 2687.9(10) | 29.5(3) |
| C22 | 5207.1(14) | -27.6(12)  | 2285.1(12) | 32.1(3) |
| C49 | -172.9(13) | 8456.9(13) | 1155.3(12) | 34.6(3) |
| C28 | 1668.0(14) | 9133.5(12) | 2359.4(12) | 33.2(3) |
| C29 | 1952.0(14) | 9890.6(11) | 1173.1(12) | 32.1(3) |

|     |            |            |            |         |
|-----|------------|------------|------------|---------|
| C50 | 903.5(15)  | 8155.4(13) | 528.0(12)  | 35.6(3) |
| C48 | -143.6(13) | 7954.5(14) | 2347.4(12) | 38.3(4) |

**Anisotropic Displacement Parameters ( $\text{\AA}^2 \times 10^3$ ) for CM\_UJ01\_LT2. The Anisotropic displacement factor exponent takes the form:  $-2\pi^2[h^2a^{*2}U_{11}+2hka^*b^*U_{12}+\dots]$ .**

| Atom | $U_{11}$  | $U_{22}$  | $U_{33}$  | $U_{23}$   | $U_{13}$  | $U_{12}$  |
|------|-----------|-----------|-----------|------------|-----------|-----------|
| P1   | 22.63(16) | 24.32(17) | 22.29(16) | -13.72(13) | -4.65(12) | 3.26(12)  |
| P26  | 24.52(17) | 22.87(17) | 24.61(17) | -8.93(13)  | -7.76(13) | -1.66(12) |
| O21  | 27.8(5)   | 21.9(4)   | 29.5(5)   | -15.5(4)   | 0.3(4)    | -1.3(4)   |
| O44  | 28.8(5)   | 20.4(4)   | 28.6(5)   | -14.2(4)   | 2.1(4)    | -0.5(3)   |
| O46  | 26.7(4)   | 20.2(4)   | 27.5(5)   | -13.9(4)   | -0.8(4)   | 0.1(3)    |
| O19  | 25.4(4)   | 21.8(4)   | 28.0(5)   | -14.7(4)   | 0.1(4)    | -1.7(3)   |
| C14  | 21.3(6)   | 21.4(6)   | 19.8(6)   | -10.0(5)   | -6.2(5)   | 3.4(5)    |
| C38  | 18.1(5)   | 20.7(6)   | 19.3(6)   | -9.1(5)    | -5.4(5)   | 2.8(4)    |
| C32  | 21.0(6)   | 16.7(5)   | 22.5(6)   | -10.3(5)   | -3.4(5)   | 2.0(4)    |
| C13  | 20.6(6)   | 20.0(6)   | 19.2(6)   | -8.5(5)    | -5.5(5)   | 2.3(4)    |
| C39  | 21.4(6)   | 21.0(6)   | 21.3(6)   | -11.4(5)   | -6.1(5)   | 4.5(5)    |
| C18  | 22.8(6)   | 20.0(6)   | 21.2(6)   | -9.1(5)    | -5.3(5)   | 1.3(5)    |
| C12  | 22.2(6)   | 17.2(5)   | 22.9(6)   | -9.9(5)    | -2.6(5)   | 1.2(4)    |
| C7   | 23.0(6)   | 16.1(5)   | 22.2(6)   | -10.0(5)   | -2.2(5)   | 0.9(4)    |
| C43  | 20.4(6)   | 19.8(6)   | 20.7(6)   | -9.4(5)    | -7.1(5)   | 2.7(4)    |
| C11  | 21.4(6)   | 24.6(6)   | 27.4(6)   | -11.4(5)   | -2.0(5)   | 0.6(5)    |
| C37  | 21.4(6)   | 18.0(6)   | 23.1(6)   | -10.8(5)   | -3.0(5)   | 2.3(4)    |
| C36  | 28.2(6)   | 25.7(6)   | 22.0(6)   | -11.6(5)   | -2.1(5)   | 2.6(5)    |
| C17  | 25.8(6)   | 27.4(7)   | 25.7(6)   | -14.6(5)   | -0.9(5)   | 3.1(5)    |
| C42  | 23.2(6)   | 27.0(6)   | 23.2(6)   | -15.1(5)   | -4.1(5)   | 3.8(5)    |
| C8   | 26.9(6)   | 22.9(6)   | 23.0(6)   | -10.9(5)   | -4.7(5)   | 1.6(5)    |
| C35  | 23.4(6)   | 28.9(7)   | 29.8(7)   | -13.9(6)   | 4.2(5)    | 0.4(5)    |

|     |         |         |         |          |          |         |
|-----|---------|---------|---------|----------|----------|---------|
| C40 | 24.2(6) | 21.7(6) | 25.5(6) | -10.4(5) | -2.3(5)  | -1.7(5) |
| C33 | 23.8(6) | 25.5(6) | 26.0(6) | -12.4(5) | -7.0(5)  | 3.3(5)  |
| C2  | 19.6(6) | 32.9(7) | 20.0(6) | -10.4(5) | -2.7(5)  | -0.8(5) |
| C41 | 20.9(6) | 29.5(7) | 23.6(6) | -12.5(5) | 1.1(5)   | -1.3(5) |
| C10 | 26.0(6) | 27.6(7) | 26.4(7) | -10.4(5) | 5.0(5)   | -1.3(5) |
| C34 | 18.4(6) | 31.0(7) | 34.8(7) | -15.1(6) | -3.8(5)  | 1.8(5)  |
| C15 | 23.0(6) | 23.4(6) | 25.0(6) | -9.9(5)  | -3.8(5)  | -2.3(5) |
| C9  | 34.1(7) | 27.2(7) | 20.2(6) | -9.5(5)  | -0.4(5)  | 1.3(5)  |
| C31 | 30.5(7) | 31.9(7) | 21.8(6) | -14.4(6) | -6.9(5)  | 4.2(5)  |
| C6  | 21.7(6) | 24.1(6) | 26.1(6) | -11.4(5) | -4.7(5)  | -2.0(5) |
| C20 | 28.1(6) | 20.9(6) | 30.2(7) | -13.7(5) | -4.6(5)  | 0.1(5)  |
| C25 | 27.0(7) | 43.1(8) | 20.8(6) | -14.0(6) | -2.1(5)  | 2.8(6)  |
| C5  | 23.2(6) | 28.9(7) | 29.6(7) | -14.3(6) | -1.9(5)  | 4.6(5)  |
| C16 | 22.8(6) | 30.8(7) | 27.3(7) | -13.3(6) | 1.9(5)   | -1.7(5) |
| C45 | 28.8(7) | 26.2(7) | 34.8(7) | -19.7(6) | -4.9(6)  | 0.0(5)  |
| C47 | 32.7(7) | 22.1(6) | 31.7(7) | -16.2(6) | -4.1(6)  | 3.6(5)  |
| C30 | 29.1(7) | 28.5(7) | 25.2(7) | -5.5(6)  | -3.1(5)  | -0.6(5) |
| C3  | 33.7(7) | 27.3(7) | 26.9(7) | -12.0(6) | -4.5(6)  | -8.1(5) |
| C23 | 30.5(7) | 30.8(7) | 30.4(7) | -16.2(6) | -12.2(6) | 1.3(5)  |
| C24 | 32.1(7) | 37.5(8) | 21.7(6) | -14.9(6) | -7.4(5)  | 2.7(6)  |
| C4  | 36.7(7) | 25.1(7) | 29.6(7) | -15.5(6) | -3.0(6)  | 2.2(5)  |
| C27 | 22.3(6) | 41.2(8) | 20.0(6) | -9.8(6)  | -4.5(5)  | 4.4(5)  |
| C22 | 34.5(7) | 32.2(7) | 39.0(8) | -25.3(6) | -1.7(6)  | -0.1(6) |
| C49 | 26.2(7) | 38.6(8) | 33.8(8) | -9.3(6)  | -13.7(6) | -2.3(6) |
| C28 | 33.1(7) | 43.5(8) | 36.1(8) | -27.9(7) | -13.1(6) | 13.6(6) |
| C29 | 32.9(7) | 26.4(7) | 40.7(8) | -16.4(6) | -13.0(6) | 2.6(5)  |
| C50 | 42.9(8) | 37.5(8) | 32.5(7) | -17.5(6) | -19.0(6) | 3.1(6)  |



C48 22.0(7) 46.0(9) 31.4(8) -4.1(7) -5.8(6) -0.8(6)

**Bond Lengths for CM\_UJ01\_LT2.**

| Atom Atom Length/Å |     |            | Atom Atom Length/Å |     |            |
|--------------------|-----|------------|--------------------|-----|------------|
| P1                 | C12 | 1.8439(13) | C43                | C42 | 1.3937(18) |
| P1                 | C2  | 1.8627(13) | C11                | C10 | 1.3895(19) |
| P1                 | C6  | 1.8617(13) | C37                | C36 | 1.4012(17) |
| P26                | C37 | 1.8445(12) | C36                | C35 | 1.3850(19) |
| P26                | C31 | 1.8624(14) | C17                | C16 | 1.3873(19) |
| P26                | C27 | 1.8608(14) | C42                | C41 | 1.3879(18) |
| O21                | C18 | 1.3681(15) | C8                 | C9  | 1.3891(19) |
| O21                | C22 | 1.4249(15) | C35                | C34 | 1.386(2)   |
| O44                | C39 | 1.3650(14) | C40                | C41 | 1.3866(18) |
| O44                | C45 | 1.4273(15) | C33                | C34 | 1.3857(19) |
| O46                | C43 | 1.3625(14) | C2                 | C25 | 1.5464(17) |
| O46                | C47 | 1.4328(15) | C2                 | C3  | 1.5298(19) |
| O19                | C14 | 1.3645(14) | C10                | C9  | 1.383(2)   |
| O19                | C20 | 1.4329(14) | C15                | C16 | 1.3874(18) |
| C14                | C13 | 1.4023(17) | C31                | C30 | 1.5356(19) |
| C14                | C15 | 1.3913(18) | C31                | C50 | 1.5420(19) |
| C38                | C32 | 1.4927(17) | C6                 | C5  | 1.5378(18) |
| C38                | C39 | 1.4006(17) | C6                 | C23 | 1.5414(18) |
| C38                | C43 | 1.4037(16) | C25                | C24 | 1.5417(19) |
| C32                | C37 | 1.4075(17) | C5                 | C4  | 1.5340(19) |
| C32                | C33 | 1.3959(17) | C30                | C29 | 1.533(2)   |
| C13                | C18 | 1.4012(17) | C3                 | C4  | 1.528(2)   |
| C13                | C7  | 1.4932(17) | C23                | C24 | 1.5340(19) |

|     |     |            |     |     |            |
|-----|-----|------------|-----|-----|------------|
| C39 | C40 | 1.3895(18) | C27 | C28 | 1.532(2)   |
| C18 | C17 | 1.3932(18) | C27 | C48 | 1.5480(19) |
| C12 | C7  | 1.4094(17) | C49 | C50 | 1.530(2)   |
| C12 | C11 | 1.4031(17) | C49 | C48 | 1.535(2)   |
| C7  | C8  | 1.3968(17) | C28 | C29 | 1.527(2)   |

**Bond Angles for CM\_UJ01\_LT2.**

| Atom | Atom | Atom | Angle/°    | Atom | Atom | Atom | Angle/°    |
|------|------|------|------------|------|------|------|------------|
| C12  | P1   | C2   | 108.05(5)  | C36  | C37  | P26  | 119.84(9)  |
| C12  | P1   | C6   | 104.27(6)  | C36  | C37  | C32  | 118.03(11) |
| C6   | P1   | C2   | 93.25(6)   | C35  | C36  | C37  | 121.64(12) |
| C37  | P26  | C31  | 104.13(6)  | C16  | C17  | C18  | 118.88(12) |
| C37  | P26  | C27  | 107.45(6)  | C41  | C42  | C43  | 118.86(11) |
| C27  | P26  | C31  | 93.07(6)   | C9   | C8   | C7   | 120.91(12) |
| C18  | O21  | C22  | 117.51(10) | C36  | C35  | C34  | 119.77(12) |
| C39  | O44  | C45  | 117.49(10) | C41  | C40  | C39  | 118.95(12) |
| C43  | O46  | C47  | 117.45(10) | C34  | C33  | C32  | 120.88(12) |
| C14  | O19  | C20  | 117.76(10) | C25  | C2   | P1   | 105.18(9)  |
| O19  | C14  | C13  | 115.23(10) | C3   | C2   | P1   | 114.31(9)  |
| O19  | C14  | C15  | 123.74(11) | C3   | C2   | C25  | 114.96(11) |
| C15  | C14  | C13  | 121.02(11) | C40  | C41  | C42  | 121.64(12) |
| C39  | C38  | C32  | 120.53(10) | C9   | C10  | C11  | 119.95(12) |
| C39  | C38  | C43  | 118.43(11) | C33  | C34  | C35  | 119.77(12) |
| C43  | C38  | C32  | 121.04(11) | C16  | C15  | C14  | 119.02(12) |
| C37  | C32  | C38  | 121.37(10) | C10  | C9   | C8   | 119.64(12) |
| C33  | C32  | C38  | 118.75(11) | C30  | C31  | P26  | 115.13(9)  |
| C33  | C32  | C37  | 119.85(11) | C30  | C31  | C50  | 114.51(11) |

|     |     |     |            |     |     |     |            |
|-----|-----|-----|------------|-----|-----|-----|------------|
| C14 | C13 | C7  | 120.56(10) | C50 | C31 | P26 | 104.96(9)  |
| C18 | C13 | C14 | 118.39(11) | C5  | C6  | P1  | 114.38(9)  |
| C18 | C13 | C7  | 121.05(11) | C5  | C6  | C23 | 114.76(11) |
| O44 | C39 | C38 | 115.23(11) | C23 | C6  | P1  | 105.29(9)  |
| O44 | C39 | C40 | 123.62(11) | C24 | C25 | C2  | 116.95(11) |
| C40 | C39 | C38 | 121.15(11) | C4  | C5  | C6  | 117.04(11) |
| O21 | C18 | C13 | 115.27(11) | C17 | C16 | C15 | 121.54(12) |
| O21 | C18 | C17 | 123.63(11) | C29 | C30 | C31 | 116.81(11) |
| C17 | C18 | C13 | 121.10(11) | C4  | C3  | C2  | 115.91(11) |
| C7  | C12 | P1  | 121.72(9)  | C24 | C23 | C6  | 115.63(11) |
| C11 | C12 | P1  | 119.77(9)  | C23 | C24 | C25 | 115.75(11) |
| C11 | C12 | C7  | 117.81(11) | C3  | C4  | C5  | 114.44(11) |
| C12 | C7  | C13 | 121.37(11) | C28 | C27 | P26 | 113.90(9)  |
| C8  | C7  | C13 | 118.60(11) | C28 | C27 | C48 | 115.22(12) |
| C8  | C7  | C12 | 120.03(11) | C48 | C27 | P26 | 105.32(10) |
| O46 | C43 | C38 | 115.23(10) | C50 | C49 | C48 | 115.11(12) |
| O46 | C43 | C42 | 123.83(11) | C29 | C28 | C27 | 116.31(11) |
| C42 | C43 | C38 | 120.94(11) | C28 | C29 | C30 | 115.10(11) |
| C10 | C11 | C12 | 121.64(12) | C49 | C50 | C31 | 115.87(11) |
| C32 | C37 | P26 | 121.50(9)  | C49 | C48 | C27 | 116.74(11) |

**Torsion Angles for CM\_UJ01\_LT2.**

| A  | B   | C   | D   | Angle/°    | A   | B   | C   | D   | Angle/°     |
|----|-----|-----|-----|------------|-----|-----|-----|-----|-------------|
| P1 | C12 | C7  | C13 | 7.33(16)   | C43 | C38 | C39 | O44 | -177.29(10) |
| P1 | C12 | C7  | C8  | -172.32(9) | C43 | C38 | C39 | C40 | 2.04(17)    |
| P1 | C12 | C11 | C10 | 171.98(10) | C43 | C42 | C41 | C40 | 0.06(19)    |
| P1 | C2  | C25 | C24 | 60.76(14)  | C11 | C12 | C7  | C13 | 177.76(11)  |
| P1 | C2  | C3  | C4  | -59.98(14) | C11 | C12 | C7  | C8  | -1.88(17)   |

|     |             |                 |     |             |             |
|-----|-------------|-----------------|-----|-------------|-------------|
| P1  | C6 C5 C4    | 56.75(14)       | C11 | C10 C9 C8   | -0.3(2)     |
| P1  | C6 C23 C24  | -63.31(13)      | C37 | P26 C31 C30 | -52.76(11)  |
| P26 | C37 C36 C35 | -<br>172.95(10) | C37 | P26 C31 C50 | -179.60(9)  |
| P26 | C31 C30 C29 | -55.44(15)      | C37 | P26 C27 C28 | 47.90(11)   |
| P26 | C31 C50 C49 | 64.12(14)       | C37 | P26 C27 C48 | 175.10(9)   |
| P26 | C27 C28 C29 | 59.86(14)       | C37 | C32 C33 C34 | -2.06(18)   |
| P26 | C27 C48 C49 | -61.56(16)      | C37 | C36 C35 C34 | -0.2(2)     |
| O21 | C18 C17 C16 | -<br>177.57(12) | C36 | C35 C34 C33 | 1.2(2)      |
| O44 | C39 C40 C41 | 177.56(11)      | C33 | C32 C37 P26 | 173.89(9)   |
| O46 | C43 C42 C41 | 179.55(11)      | C33 | C32 C37 C36 | 3.01(17)    |
| O19 | C14 C13 C18 | -<br>179.07(10) | C2  | P1 C12 C7   | -60.00(11)  |
| O19 | C14 C13 C7  | 1.83(16)        | C2  | P1 C12 C11  | 129.75(10)  |
| O19 | C14 C15 C16 | -<br>178.97(11) | C2  | P1 C6 C5    | -55.79(10)  |
| C14 | C13 C18 O21 | 176.53(10)      | C2  | P1 C6 C23   | 71.13(9)    |
| C14 | C13 C18 C17 | -2.75(18)       | C2  | C25 C24 C23 | -43.65(18)  |
| C14 | C13 C7 C12  | 107.54(13)      | C2  | C3 C4 C5    | 47.48(16)   |
| C14 | C13 C7 C8   | -72.81(15)      | C15 | C14 C13 C18 | 1.96(17)    |
| C14 | C15 C16 C17 | -1.1(2)         | C15 | C14 C13 C7  | -177.14(11) |
| C38 | C32 C37 P26 | -4.02(15)       | C31 | P26 C37 C32 | 158.00(10)  |
| C38 | C32 C37 C36 | -<br>174.91(11) | C31 | P26 C37 C36 | -31.27(11)  |
| C38 | C32 C33 C34 | 175.90(12)      | C31 | P26 C27 C28 | -57.94(10)  |
| C38 | C39 C40 C41 | -1.72(18)       | C31 | P26 C27 C48 | 69.26(10)   |
| C38 | C43 C42 C41 | 0.29(18)        | C31 | C30 C29 C28 | 43.95(17)   |
| C32 | C38 C39 O44 | 3.00(16)        | C6  | P1 C12 C7   | -158.30(10) |

|     |             |                 |     |             |             |
|-----|-------------|-----------------|-----|-------------|-------------|
| C32 | C38 C39 C40 | -<br>177.67(11) | C6  | P1 C12 C11  | 31.45(11)   |
| C32 | C38 C43 O46 | -0.93(16)       | C6  | P1 C2 C25   | -69.32(9)   |
| C32 | C38 C43 C42 | 178.39(11)      | C6  | P1 C2 C3    | 57.72(10)   |
| C32 | C37 C36 C35 | -1.91(18)       | C6  | C5 C4 C3    | -46.13(16)  |
| C32 | C33 C34 C35 | -0.1(2)         | C6  | C23 C24 C25 | 44.64(17)   |
| C13 | C14 C15 C16 | -0.09(18)       | C20 | O19 C14 C13 | -168.88(10) |
| C13 | C18 C17 C16 | 1.65(19)        | C20 | O19 C14 C15 | 10.05(17)   |
| C13 | C7 C8 C9    | -<br>178.28(11) | C25 | C2 C3 C4    | 61.84(15)   |
| C39 | C38 C32 C37 | 73.37(15)       | C5  | C6 C23 C24  | 63.37(15)   |
| C39 | C38 C32 C33 | -<br>104.56(13) | C45 | O44 C39 C38 | -173.48(11) |
| C39 | C38 C43 O46 | 179.36(10)      | C45 | O44 C39 C40 | 7.20(17)    |
| C39 | C38 C43 C42 | -1.32(17)       | C47 | O46 C43 C38 | 170.06(10)  |
| C39 | C40 C41 C42 | 0.64(19)        | C47 | O46 C43 C42 | -9.24(17)   |
| C18 | C13 C7 C12  | -71.54(15)      | C30 | C31 C50 C49 | -63.10(16)  |
| C18 | C13 C7 C8   | 108.11(13)      | C3  | C2 C25 C24  | -65.88(16)  |
| C18 | C17 C16 C15 | 0.3(2)          | C23 | C6 C5 C4    | -65.11(15)  |
| C12 | P1 C2 C25   | -175.47(8)      | C27 | P26 C37 C32 | 60.13(11)   |
| C12 | P1 C2 C3    | -48.43(10)      | C27 | P26 C37 C36 | -129.15(10) |
| C12 | P1 C6 C5    | 53.76(10)       | C27 | P26 C31 C30 | 56.11(11)   |
| C12 | P1 C6 C23   | -179.32(8)      | C27 | P26 C31 C50 | -70.74(10)  |
| C12 | C7 C8 C9    | 1.38(18)        | C27 | C28 C29 C30 | -46.35(17)  |
| C12 | C11 C10 C9  | -0.3(2)         | C22 | O21 C18 C13 | 162.54(11)  |
| C7  | C13 C18 O21 | -4.37(16)       | C22 | O21 C18 C17 | -18.20(18)  |
| C7  | C13 C18 C17 | 176.34(11)      | C28 | C27 C48 C49 | 64.83(18)   |
| C7  | C12 C11 C10 | 1.35(18)        | C50 | C31 C30 C29 | 66.39(16)   |

|     |     |     |     |                 |     |     |     |     |            |
|-----|-----|-----|-----|-----------------|-----|-----|-----|-----|------------|
| C7  | C8  | C9  | C10 | -0.26(19)       | C50 | C49 | C48 | C27 | 44.9(2)    |
| C43 | C38 | C32 | C37 | -<br>106.33(13) | C48 | C27 | C28 | C29 | -62.02(16) |
| C43 | C38 | C32 | C33 | 75.74(15)       | C48 | C49 | C50 | C31 | -46.20(18) |

**Hydrogen Atom Coordinates ( $\text{\AA}\times 10^4$ ) and Isotropic Displacement Parameters ( $\text{\AA}^2\times 10^3$ ) for CM\_UJ01\_LT2.**

| Atom | x       | y       | z       | U(eq) |
|------|---------|---------|---------|-------|
| H11  | 804.33  | 1582.75 | 3777.7  | 30    |
| H36  | 4661.92 | 7836.65 | 957.55  | 30    |
| H17  | 7062.83 | 1321.46 | 1670.34 | 31    |
| H42  | 1274.33 | 7162.48 | 6117.63 | 28    |
| H8   | 4451.85 | 1326.72 | 5172.86 | 29    |
| H35  | 6685.33 | 7804.68 | 1293.37 | 34    |
| H40  | 1019.8  | 4428.03 | 5825.43 | 29    |
| H33  | 5385.49 | 6735.79 | 4370.59 | 29    |
| H2   | 4451.25 | 3476.74 | 1220.66 | 30    |
| H41  | 342.62  | 5472.1  | 6659    | 30    |
| H10  | 719.7   | 922.07  | 5576.87 | 34    |
| H34  | 7049.53 | 7277.66 | 3001.2  | 34    |
| H15  | 7294.49 | 3954.47 | 2134.13 | 29    |
| H9   | 2543.31 | 794.64  | 6279.74 | 34    |
| H31  | 2813.28 | 7994.44 | 341.15  | 32    |
| H6   | 537.96  | 2191.44 | 2078.13 | 29    |
| H20A | 5692.46 | 5086.02 | 2344.95 | 38    |
| H20B | 6486.45 | 4598.89 | 3271.51 | 38    |
| H20C | 5136.09 | 4992.65 | 3453.37 | 38    |
| H25A | 3934.52 | 4545.75 | -476.06 | 37    |

|              |         |         |    |
|--------------|---------|---------|----|
| H25B 3890.96 | 3309.36 | -169.67 | 37 |
| H5A 4.57     | 3959.22 | 1730.02 | 33 |
| H5B 737.41   | 3426.66 | 2689.24 | 33 |
| H16 8105.36  | 2903.68 | 1340.48 | 33 |
| H45A 2700.25 | 3609.18 | 4094.05 | 42 |
| H45B 1425.33 | 4055.61 | 4381.08 | 42 |
| H45C 2269.74 | 3428.41 | 5252.39 | 42 |
| H47A 3079.96 | 9544.64 | 4554.11 | 41 |
| H47B 2676.1  | 8561.3  | 5674.6  | 41 |
| H47C 1761.05 | 8956.84 | 4836.35 | 41 |
| H30A 3541.28 | 9365.27 | 595.67  | 37 |
| H30B 2612.5  | 9858.7  | -223.25 | 37 |
| H3A 3258.39  | 4211.17 | 2184.44 | 35 |
| H3B 3614.27  | 5109.68 | 1015.01 | 35 |
| H23A 1326.01 | 2419.61 | 407.65  | 35 |
| H23B 349.37  | 3307.26 | 307.77  | 35 |
| H24A 1838.62 | 4660.02 | -410.6  | 36 |
| H24B 2206.86 | 3952.43 | -988.59 | 36 |
| H4A 1623.49  | 5139.1  | 683.04  | 35 |
| H4B 1506.36  | 5162.99 | 1766.9  | 35 |
| H27 1023.42  | 7596.01 | 3461.5  | 35 |
| H22A 5124.54 | 474.96  | 1568.94 | 48 |
| H22B 4641.31 | -644.41 | 2530.63 | 48 |
| H22C 6052.02 | -264.1  | 2315.68 | 48 |
| H49A -958.52 | 8232.76 | 1050.27 | 42 |
| H49B -159.52 | 9241.71 | 868.1   | 42 |
| H28A 1075.35 | 9478.49 | 2676.78 | 40 |

|      |         |          |         |    |
|------|---------|----------|---------|----|
| H28B | 2435.38 | 9059.59  | 2654.46 | 40 |
| H29A | 2439.5  | 10519.52 | 1061.78 | 39 |
| H29B | 1166.39 | 10145.84 | 913.19  | 39 |
| H50A | 898.84  | 8626.84  | -218.87 | 43 |
| H50B | 741.94  | 7416.67  | 658.41  | 43 |
| H48A | -435.74 | 7200.02  | 2668.05 | 46 |
| H48B | -737.61 | 8322.87  | 2636.98 | 46 |

### Ligand 3

**Fractional Atomic Coordinates ( $\times 10^4$ ) and Equivalent Isotropic Displacement Parameters ( $\text{\AA}^2 \times 10^3$ ) for 20jl\_PA\_100K.  $U_{\text{eq}}$  is defined as 1/3 of the trace of the orthogonalised  $U_{ij}$  tensor.**

| Atom | x          | y          | z           | U(eq)     |
|------|------------|------------|-------------|-----------|
| P2   | 3768.0(7)  | 1821.1(5)  | 6987.9(4)   | 15.53(15) |
| C1   | 5579(3)    | 2178.8(19) | 6396.8(15)  | 16.1(4)   |
| C2   | 5215(3)    | 2411.1(19) | 5309.6(15)  | 15.3(4)   |
| C3   | 6576(3)    | 2720.9(19) | 4860.5(16)  | 18.3(4)   |
| C8   | 4617(3)    | 852(2)     | 8192.9(15)  | 16.9(4)   |
| C7   | 5938(3)    | 2898(2)    | 9411.7(15)  | 17.6(4)   |
| C5   | 8643(3)    | 2532(2)    | 6504.4(16)  | 20.1(5)   |
| C6   | 7571(3)    | 3351(2)    | 10262.1(16) | 21.9(5)   |
| C9   | 5058(3)    | -596(2)    | 7898.7(16)  | 21.0(5)   |
| C4   | 8273(3)    | 2789(2)    | 5442.9(16)  | 20.2(5)   |
| O6   | 6140.4(17) | 1552.2(13) | 8957.9(10)  | 16.5(3)   |
| O3   | 2514.4(17) | 3197.6(14) | 8379.7(10)  | 17.4(3)   |
| O4   | 4570.9(17) | 2752.8(14) | 9915.3(10)  | 17.6(3)   |
| C15  | 7310(3)    | 2232(2)    | 6964.0(16)  | 17.8(4)   |
| C10  | 3794(2)    | 3518(2)    | 7796.7(15)  | 16.5(4)   |
| C12  | 3423(3)    | 2349(2)    | 4602.9(15)  | 16.1(4)   |



|     |         |         |            |         |
|-----|---------|---------|------------|---------|
| C13 | 2286(3) | 1105(2) | 4421.1(15) | 19.1(4) |
| C22 | 2886(3) | 3524(2) | 4064.9(15) | 20.2(5) |
| C20 | 3155(3) | 769(2)  | 8735.1(15) | 17.4(4) |
| C11 | 2970(3) | 2231(2) | 9186.0(15) | 18.1(4) |
| C24 | 5515(2) | 3975(2) | 8589.1(15) | 17.3(4) |
| C17 | 151(3)  | 2224(2) | 3198.6(16) | 23.0(5) |
| C18 | 1271(3) | 3463(2) | 3366.4(16) | 24.0(5) |
| C16 | 668(3)  | 1049(2) | 3731.5(15) | 21.9(5) |
| C21 | 1599(3) | 2212(2) | 9777.2(16) | 23.0(5) |
| C23 | 3172(3) | 4677(2) | 7094.3(16) | 22.1(5) |

**Anisotropic Displacement Parameters ( $\text{\AA}^2 \times 10^3$ ) for 20jl\_PA\_100K. The Anisotropic displacement factor exponent takes the form:  $-2\pi^2[h^2a^{*2}U_{11}+2hka^*b^*U_{12}+\dots]$ .**

| Atom | $U_{11}$ | $U_{22}$ | $U_{33}$ | $U_{23}$ | $U_{13}$ | $U_{12}$ |
|------|----------|----------|----------|----------|----------|----------|
| P2   | 15.2(3)  | 19.0(3)  | 12.5(3)  | 0.8(2)   | 4.3(2)   | 0.9(2)   |
| C1   | 19.8(11) | 12.0(10) | 18.4(10) | -1.2(8)  | 8.4(8)   | 2.2(8)   |
| C2   | 20.0(10) | 9.2(9)   | 16.3(10) | -2.9(8)  | 5.3(8)   | 0.4(8)   |
| C3   | 27.0(12) | 13.7(10) | 16.3(10) | 0.6(8)   | 9.5(9)   | 1.6(8)   |
| C8   | 19.7(11) | 16.7(10) | 13.5(10) | -0.6(8)  | 4.1(8)   | 0.0(8)   |
| C7   | 17.6(11) | 19.3(10) | 18.4(10) | -3.5(8)  | 9.5(9)   | 3.3(8)   |
| C5   | 19.0(11) | 17.5(10) | 22.4(11) | -3.5(8)  | 4.1(9)   | 1.4(8)   |
| C6   | 19.4(11) | 26.9(12) | 19.2(11) | -4.7(9)  | 5.4(9)   | 3.3(9)   |
| C9   | 25.3(12) | 17.5(11) | 20.2(11) | -0.2(8)  | 6.1(9)   | 2.0(9)   |
| C4   | 23.5(11) | 15.3(10) | 24.9(11) | -1.9(8)  | 13.1(9)  | 0.4(8)   |
| O6   | 17.5(7)  | 16.6(7)  | 14.2(7)  | -1.9(5)  | 2.1(6)   | 3.1(6)   |
| O3   | 17.0(7)  | 20.0(7)  | 17.5(7)  | 3.1(6)   | 7.5(6)   | 4.5(6)   |
| O4   | 16.9(7)  | 22.2(8)  | 14.7(7)  | -2.2(6)  | 6.7(6)   | 1.5(6)   |
| C15  | 19.5(11) | 18.5(10) | 15.8(10) | -1.7(8)  | 5.7(8)   | 2.9(8)   |

|     |          |          |          |         |         |         |
|-----|----------|----------|----------|---------|---------|---------|
| C10 | 16.2(10) | 19.4(10) | 16.7(10) | 1.2(8)  | 9.2(8)  | 3.0(8)  |
| C12 | 21.1(11) | 16.7(10) | 11.6(9)  | -2.7(8) | 6.7(8)  | 3.0(8)  |
| C13 | 22.7(11) | 17.5(10) | 17.1(10) | 1.4(8)  | 5.3(9)  | 2.3(8)  |
| C22 | 23.2(11) | 17.4(10) | 19.9(11) | 0.4(8)  | 6.8(9)  | -0.7(8) |
| C20 | 18.3(11) | 20.3(11) | 13.8(10) | 3.2(8)  | 5.3(8)  | -0.1(8) |
| C11 | 16.7(10) | 23.3(11) | 14.0(10) | 1.9(8)  | 3.9(8)  | 2.0(8)  |
| C24 | 17.1(10) | 16.1(10) | 20.0(10) | -2.6(8) | 7.9(9)  | 1.2(8)  |
| C17 | 21.2(11) | 27.5(12) | 16.9(11) | -0.8(9) | -1.2(9) | 4.6(9)  |
| C18 | 28.9(12) | 24.1(11) | 19.9(11) | 5.5(9)  | 5.3(10) | 8.3(9)  |
| C16 | 24.9(12) | 18.6(11) | 19.6(11) | -4.2(9) | 3.8(9)  | -1.7(9) |
| C21 | 20.4(11) | 32.3(12) | 18.8(11) | 1.2(9)  | 9.6(9)  | 3.1(9)  |
| C23 | 23.3(11) | 22.7(11) | 23.2(11) | 5.8(9)  | 8.9(9)  | 6.6(9)  |

**Bond Lengths for 20jl\_PA\_100K.**

| Atom Atom Length/Å |     |          | Atom Atom Length/Å |     |          |
|--------------------|-----|----------|--------------------|-----|----------|
| P2                 | C1  | 1.839(2) | C5                 | C4  | 1.387(3) |
| P2                 | C8  | 1.875(2) | C5                 | C15 | 1.379(3) |
| P2                 | C10 | 1.886(2) | O3                 | C10 | 1.457(2) |
| C1                 | C2  | 1.414(3) | O3                 | C11 | 1.433(2) |
| C1                 | C15 | 1.400(3) | O4                 | C11 | 1.425(2) |
| C2                 | C3  | 1.391(3) | C10                | C24 | 1.517(3) |
| C2                 | C12 | 1.499(3) | C10                | C23 | 1.508(3) |
| C3                 | C4  | 1.381(3) | C12                | C13 | 1.396(3) |
| C8                 | C9  | 1.512(3) | C12                | C22 | 1.392(3) |
| C8                 | O6  | 1.453(2) | C13                | C16 | 1.380(3) |
| C8                 | C20 | 1.529(3) | C22                | C18 | 1.383(3) |
| C7                 | C6  | 1.503(3) | C20                | C11 | 1.520(3) |

|    |     |          |     |     |          |
|----|-----|----------|-----|-----|----------|
| C7 | O6  | 1.428(2) | C11 | C21 | 1.510(3) |
| C7 | O4  | 1.428(2) | C17 | C18 | 1.386(3) |
| C7 | C24 | 1.519(3) | C17 | C16 | 1.385(3) |

**Bond Angles for 20jl\_PA\_100K.**

| Atom Atom Atom Angle/° |    |     |            | Atom Atom Atom Angle/° |     |     |            |
|------------------------|----|-----|------------|------------------------|-----|-----|------------|
| C1                     | P2 | C8  | 106.00(9)  | C11                    | O3  | C10 | 115.15(14) |
| C1                     | P2 | C10 | 103.94(9)  | C11                    | O4  | C7  | 111.66(14) |
| C8                     | P2 | C10 | 92.54(9)   | C5                     | C15 | C1  | 122.31(18) |
| C2                     | C1 | P2  | 118.61(15) | O3                     | C10 | P2  | 104.84(12) |
| C15                    | C1 | P2  | 123.59(15) | O3                     | C10 | C24 | 108.12(15) |
| C15                    | C1 | C2  | 117.80(17) | O3                     | C10 | C23 | 106.52(15) |
| C1                     | C2 | C12 | 123.43(17) | C24                    | C10 | P2  | 113.37(13) |
| C3                     | C2 | C1  | 119.10(18) | C23                    | C10 | P2  | 110.92(14) |
| C3                     | C2 | C12 | 117.48(17) | C23                    | C10 | C24 | 112.51(16) |
| C4                     | C3 | C2  | 121.88(18) | C13                    | C12 | C2  | 121.45(17) |
| C9                     | C8 | P2  | 111.16(13) | C22                    | C12 | C2  | 120.15(17) |
| C9                     | C8 | C20 | 112.51(16) | C22                    | C12 | C13 | 118.31(18) |
| O6                     | C8 | P2  | 116.19(12) | C16                    | C13 | C12 | 120.65(19) |
| O6                     | C8 | C9  | 106.37(15) | C18                    | C22 | C12 | 121.00(19) |
| O6                     | C8 | C20 | 106.87(15) | C11                    | C20 | C8  | 110.51(16) |
| C20                    | C8 | P2  | 103.81(13) | O3                     | C11 | C20 | 112.12(15) |
| C6                     | C7 | C24 | 113.16(16) | O3                     | C11 | C21 | 106.02(16) |
| O6                     | C7 | C6  | 106.56(15) | O4                     | C11 | O3  | 110.14(15) |
| O6                     | C7 | C24 | 112.15(15) | O4                     | C11 | C20 | 107.80(15) |
| O4                     | C7 | C6  | 107.00(15) | O4                     | C11 | C21 | 107.46(15) |
| O4                     | C7 | O6  | 110.05(15) | C21                    | C11 | C20 | 113.19(17) |

|     |    |     |            |     |     |     |            |
|-----|----|-----|------------|-----|-----|-----|------------|
| O4  | C7 | C24 | 107.79(15) | C10 | C24 | C7  | 111.00(16) |
| C15 | C5 | C4  | 119.47(19) | C16 | C17 | C18 | 119.44(19) |
| C3  | C4 | C5  | 119.42(19) | C22 | C18 | C17 | 120.09(19) |
| C7  | O6 | C8  | 115.19(14) | C13 | C16 | C17 | 120.50(19) |

**Torsion Angles for 20jl\_PA\_100K.**

| <b>A</b> | <b>B</b> | <b>C</b> | <b>D</b> | <b>Angle/°</b> | <b>A</b> | <b>B</b> | <b>C</b> | <b>D</b> | <b>Angle/°</b> |
|----------|----------|----------|----------|----------------|----------|----------|----------|----------|----------------|
| P2       | C1       | C2       | C3       | 178.27(14)     | C9       | C8       | O6       | C7       | -174.56(15)    |
| P2       | C1       | C2       | C12      | -1.4(3)        | C9       | C8       | C20      | C11      | 170.05(16)     |
| P2       | C1       | C15      | C5       | -178.64(15)    | C4       | C5       | C15      | C1       | -0.1(3)        |
| P2       | C8       | O6       | C7       | 61.13(18)      | O6       | C8       | C20      | C11      | 53.67(19)      |
| P2       | C8       | C20      | C11      | -69.66(17)     | O6       | C7       | O4       | C11      | -60.60(19)     |
| P2       | C10      | C24      | C7       | -63.92(18)     | O6       | C7       | C24      | C10      | 63.5(2)        |
| C1       | P2       | C8       | C9       | -66.55(15)     | O3       | C10      | C24      | C7       | 51.9(2)        |
| C1       | P2       | C8       | O6       | 55.25(15)      | O4       | C7       | O6       | C8       | 57.77(19)      |
| C1       | P2       | C8       | C20      | 172.25(12)     | O4       | C7       | C24      | C10      | -57.75(19)     |
| C1       | P2       | C10      | O3       | -172.89(11)    | C15      | C1       | C2       | C3       | -1.9(3)        |
| C1       | P2       | C10      | C24      | -55.18(15)     | C15      | C1       | C2       | C12      | 178.45(17)     |
| C1       | P2       | C10      | C23      | 72.53(15)      | C15      | C5       | C4       | C3       | -0.9(3)        |
| C1       | C2       | C3       | C4       | 0.9(3)         | C10      | P2       | C1       | C2       | -106.24(16)    |
| C1       | C2       | C12      | C13      | -61.9(3)       | C10      | P2       | C1       | C15      | 73.88(17)      |
| C1       | C2       | C12      | C22      | 121.6(2)       | C10      | P2       | C8       | C9       | -171.84(14)    |
| C2       | C1       | C15      | C5       | 1.5(3)         | C10      | P2       | C8       | O6       | -50.03(14)     |
| C2       | C3       | C4       | C5       | 0.5(3)         | C10      | P2       | C8       | C20      | 66.96(13)      |
| C2       | C12      | C13      | C16      | -177.09(18)    | C10      | O3       | C11      | O4       | 56.40(19)      |
| C2       | C12      | C22      | C18      | 176.51(18)     | C10      | O3       | C11      | C20      | -63.6(2)       |
| C3       | C2       | C12      | C13      | 118.4(2)       | C10      | O3       | C11      | C21      | 172.36(15)     |

|                            |                            |
|----------------------------|----------------------------|
| C3 C2 C12 C22 -58.1(2)     | C12 C2 C3 C4 -179.37(17)   |
| C8 P2 C1 C2 156.94(15)     | C12 C13 C16 C17 0.7(3)     |
| C8 P2 C1 C15 -22.93(18)    | C12 C22 C18 C17 0.5(3)     |
| C8 P2 C10 O3 -65.71(13)    | C13 C12 C22 C18 -0.1(3)    |
| C8 P2 C10 C24 51.99(14)    | C22 C12 C13 C16 -0.5(3)    |
| C8 P2 C10 C23 179.70(14)   | C20 C8 O6 C7 -54.15(19)    |
| C8 C20 C11 O3 62.8(2)      | C11 O3 C10 P2 69.32(16)    |
| C8 C20 C11 O4 -58.63(19)   | C11 O3 C10 C24 -51.9(2)    |
| C8 C20 C11 C21 -177.35(16) | C11 O3 C10 C23 -173.05(15) |
| C7 O4 C11 O3 -61.09(19)    | C24 C7 O6 C8 -62.2(2)      |
| C7 O4 C11 C20 61.53(18)    | C24 C7 O4 C11 61.99(19)    |
| C7 O4 C11 C21 -176.15(15)  | C18 C17 C16 C13 -0.3(3)    |
| C6 C7 O6 C8 173.45(15)     | C16 C17 C18 C22 -0.4(3)    |
| C6 C7 O4 C11 -176.00(15)   | C23 C10 C24 C7 169.21(16)  |
| C6 C7 C24 C10 -175.86(16)  |                            |

**Hydrogen Atom Coordinates ( $\text{\AA}\times 10^4$ ) and Isotropic Displacement Parameters ( $\text{\AA}^2\times 10^3$ ) for 20jl\_PA\_100K.**

| Atom | x       | y        | z        | U(eq) |
|------|---------|----------|----------|-------|
| H3   | 6335.31 | 2886.92  | 4147.89  | 22    |
| H5   | 9779.84 | 2560.92  | 6902.89  | 24    |
| H6A  | 7791.48 | 2619.04  | 10744.68 | 33    |
| H6B  | 7449.5  | 4209.6   | 10636.25 | 33    |
| H6C  | 8513.67 | 3512.29  | 9948.3   | 33    |
| H9A  | 4088.87 | -1097.85 | 7385.22  | 32    |
| H9B  | 5332.99 | -1119.61 | 8517.26  | 32    |
| H9C  | 6030.89 | -489.73  | 7606.97  | 32    |
| H4   | 9160.61 | 3004.86  | 5126.08  | 24    |

|      |         |         |          |    |
|------|---------|---------|----------|----|
| H15  | 7570.24 | 2059.72 | 7675.82  | 21 |
| H13  | 2623.39 | 305.64  | 4768.2   | 23 |
| H22  | 3625.33 | 4362.44 | 4176.96  | 24 |
| H20A | 2083.66 | 391.9   | 8229.26  | 21 |
| H20B | 3391.26 | 132.31  | 9298.96  | 21 |
| H24A | 5477.82 | 4890.32 | 8936.26  | 21 |
| H24B | 6412.9  | 4077.06 | 8222.76  | 21 |
| H17  | -938.92 | 2181.88 | 2732.2   | 28 |
| H18  | 935.41  | 4255.19 | 3008.49  | 29 |
| H16  | -80.32  | 216.94  | 3623.78  | 26 |
| H21A | 1596.96 | 3147.66 | 10085.68 | 35 |
| H21B | 1834.57 | 1566.08 | 10324.45 | 35 |
| H21C | 492.38  | 1912.25 | 9297.35  | 35 |
| H23A | 3952.1  | 4894.38 | 6668.91  | 33 |
| H23B | 3122.9  | 5510.27 | 7522.16  | 33 |
| H23C | 2044.21 | 4365.2  | 6644.55  | 33 |

#### Ligand 4

**Fractional Atomic Coordinates ( $\times 10^4$ ) and Equivalent Isotropic Displacement Parameters ( $\text{\AA}^2 \times 10^3$ ) for mo\_20jl\_CGdavePhos\_RT\_solve\_a.  $U_{eq}$  is defined as 1/3 of the trace of the orthogonalised  $U_{ij}$  tensor.**

| Atom | <i>x</i>  | <i>y</i>   | <i>z</i>  | $U_{eq}$  |
|------|-----------|------------|-----------|-----------|
| P1   | 6417.3(2) | 6877.0(4)  | 6259.9(2) | 33.53(11) |
| O1   | 6879.6(5) | 4575.1(12) | 5806.3(5) | 46.5(3)   |
| O2   | 6780.2(5) | 5817.9(13) | 4932.9(4) | 46.2(3)   |
| N2   | 6495.0(7) | 8984.1(18) | 7368.1(6) | 60.7(4)   |
| O3   | 6297.2(4) | 8021.3(11) | 5154.1(4) | 36.8(2)   |
| C1   | 5237.1(6) | 8328.6(18) | 5650.5(6) | 42.5(3)   |

|      |            |            |            |          |
|------|------------|------------|------------|----------|
| C00B | 7297.4(6)  | 7222.3(18) | 5802.4(6)  | 39.0(3)  |
| C00D | 7166.1(6)  | 5605.2(18) | 5522.1(6)  | 42.8(3)  |
| C00E | 5879.5(7)  | 5389.3(18) | 5161.0(7)  | 45.2(3)  |
| C00F | 6202.8(6)  | 6510.0(18) | 4884.9(6)  | 41.9(3)  |
| C00G | 6776.9(7)  | 9757.9(18) | 5928.9(7)  | 49.0(4)  |
| C00L | 6025.3(9)  | 3737(2)    | 6044.4(9)  | 61.3(5)  |
| C00O | 7741.2(8)  | 4760(2)    | 5527.3(8)  | 61.4(5)  |
| C00P | 5852.8(8)  | 6802(3)    | 4250.7(7)  | 61.4(5)  |
| C2   | 4645.6(7)  | 8750(2)    | 5596.6(7)  | 54.1(4)  |
| C3   | 4432.5(8)  | 8405(2)    | 6034.7(8)  | 63.5(5)  |
| C4   | 4816.8(7)  | 7711(2)    | 6533.2(7)  | 54.9(4)  |
| C5   | 5424.7(6)  | 7335.7(17) | 6605.9(6)  | 38.3(3)  |
| C005 | 6695.0(6)  | 8037.1(16) | 5759.0(5)  | 33.5(3)  |
| C6   | 5828.2(6)  | 6674.9(17) | 7173.3(6)  | 39.4(3)  |
| C7   | 5683.9(8)  | 5221(2)    | 7346.6(7)  | 50.1(4)  |
| C8   | 6035.9(9)  | 4564(2)    | 7872.5(8)  | 63.3(5)  |
| C9   | 6537.6(9)  | 5371(3)    | 8230.0(8)  | 68.5(6)  |
| C009 | 6272.4(6)  | 5074.8(17) | 5785.8(7)  | 41.1(3)  |
| C10  | 6693.4(8)  | 6813(3)    | 8069.1(7)  | 61.3(5)  |
| C11  | 6342.5(7)  | 7503(2)    | 7542.9(6)  | 46.4(4)  |
| C13  | 7144.1(11) | 9442(3)    | 7621.1(10) | 96.3(8)  |
| C15  | 5635.1(6)  | 7591.1(16) | 6148.2(6)  | 34.0(3)  |
| C14  | 6079.0(14) | 10249(3)   | 7368.7(13) | 105.2(9) |

**Anisotropic Displacement Parameters ( $\text{\AA}^2 \times 10^3$ ) for mo\_20jl\_CGdavePhos\_RT\_solve\_a. The Anisotropic displacement factor exponent takes the form:  $-2\pi^2[h^2a^{*2}U_{11}+2hka^*b^*U_{12}+\dots]$ .**

| Atom | $U_{11}$  | $U_{22}$ | $U_{33}$  | $U_{23}$ | $U_{13}$  | $U_{12}$ |
|------|-----------|----------|-----------|----------|-----------|----------|
| P1   | 29.12(18) | 40.7(2)  | 33.13(18) | 4.40(14) | 14.00(14) | 5.86(14) |

|      |          |          |          |           |          |           |
|------|----------|----------|----------|-----------|----------|-----------|
| O1   | 45.4(6)  | 41.8(6)  | 63.4(7)  | 7.6(5)    | 33.1(5)  | 11.9(4)   |
| O2   | 42.6(5)  | 59.0(7)  | 42.9(6)  | -7.0(5)   | 22.6(5)  | 3.6(5)    |
| N2   | 72.6(10) | 58.2(9)  | 50.8(8)  | -8.8(7)   | 21.4(7)  | -13.0(7)  |
| O3   | 34.6(5)  | 43.4(5)  | 31.6(5)  | 2.2(4)    | 10.7(4)  | 1.4(4)    |
| C1   | 39.2(7)  | 48.7(8)  | 41.5(8)  | 6.9(6)    | 16.8(6)  | 8.3(6)    |
| C00B | 28.4(6)  | 51.9(8)  | 38.7(7)  | 3.4(6)    | 14.6(5)  | -0.5(6)   |
| C00D | 37.3(7)  | 51.1(8)  | 46.8(8)  | 4.3(7)    | 23.3(6)  | 7.6(6)    |
| C00E | 38.9(7)  | 46.0(8)  | 52.6(9)  | -14.3(7)  | 18.9(7)  | -8.1(6)   |
| C00F | 35.9(7)  | 52.8(9)  | 38.0(7)  | -8.8(6)   | 14.3(6)  | -1.7(6)   |
| C00G | 50.8(9)  | 42.4(8)  | 53.6(9)  | -4.8(7)   | 18.3(7)  | -7.6(7)   |
| C00L | 68.0(11) | 39.7(8)  | 93.6(14) | 6.4(9)    | 50.1(10) | -0.3(8)   |
| C00O | 52.1(9)  | 72.7(12) | 72.7(12) | 8.7(9)    | 38.5(9)  | 20.4(9)   |
| C00P | 55.2(10) | 87.6(13) | 37.5(8)  | -9.7(8)   | 11.7(7)  | -2.4(9)   |
| C2   | 42.3(8)  | 63.5(10) | 52.8(9)  | 13.5(8)   | 12.7(7)  | 19.4(8)   |
| C3   | 37.4(8)  | 88.2(13) | 69.3(11) | 16.0(10)  | 24.5(8)  | 24.2(9)   |
| C4   | 42.4(8)  | 75.9(12) | 56.4(10) | 11.6(8)   | 29.9(7)  | 14.7(8)   |
| C5   | 35.7(7)  | 43.1(8)  | 40.2(7)  | 2.4(6)    | 18.5(6)  | 5.7(6)    |
| C005 | 29.7(6)  | 39.4(7)  | 31.0(6)  | -0.6(5)   | 10.5(5)  | -1.1(5)   |
| C6   | 39.6(7)  | 48.7(8)  | 37.1(7)  | 4.5(6)    | 22.3(6)  | 10.3(6)   |
| C7   | 52.9(9)  | 55.6(9)  | 51.5(9)  | 7.7(7)    | 30.6(7)  | 6.4(7)    |
| C8   | 78.0(13) | 62.2(11) | 63.6(11) | 24.2(9)   | 42.0(10) | 22.1(10)  |
| C9   | 63.3(11) | 93.9(15) | 51.1(10) | 26.8(10)  | 23.7(9)  | 30.2(11)  |
| C009 | 38.8(7)  | 35.9(7)  | 57.0(9)  | 0.6(6)    | 27.6(7)  | 2.8(6)    |
| C10  | 50.3(9)  | 89.5(14) | 41.4(9)  | 1.3(9)    | 13.0(7)  | 10.3(9)   |
| C11  | 47.8(8)  | 57.5(9)  | 37.8(7)  | -1.5(7)   | 20.1(6)  | 5.8(7)    |
| C13  | 96.2(17) | 114(2)   | 70.0(14) | -18.1(13) | 19.2(12) | -51.9(15) |
| C15  | 31.7(6)  | 36.8(7)  | 35.9(7)  | 2.3(5)    | 15.0(5)  | 4.7(5)    |



C14 146(2)            52.3(12)            125(2)            -8.2(13)            57.2(19)            3.7(14)

**Bond Lengths for mo\_20jl\_CGdavePhos\_RT\_solve\_a.**

| <b>Atom Atom Length/Å</b> |                 | <b>Atom Atom Length/Å</b> |                |
|---------------------------|-----------------|---------------------------|----------------|
| P1                        | C005 1.8698(14) | C00E                      | C00F 1.517(2)  |
| P1                        | C009 1.8813(15) | C00E                      | C009 1.514(2)  |
| P1                        | C15 1.8385(13)  | C00F                      | C00P 1.510(2)  |
| O1                        | C00D 1.4266(18) | C00G                      | C005 1.509(2)  |
| O1                        | C009 1.4553(16) | C00L                      | C009 1.512(2)  |
| O2                        | C00D 1.4256(18) | C2                        | C3 1.377(2)    |
| O2                        | C00F 1.4285(17) | C3                        | C4 1.371(2)    |
| N2                        | C11 1.413(2)    | C4                        | C5 1.3942(19)  |
| N2                        | C13 1.462(3)    | C5                        | C6 1.4921(19)  |
| N2                        | C14 1.443(3)    | C5                        | C15 1.4036(18) |
| O3                        | C00F 1.4231(17) | C6                        | C7 1.384(2)    |
| O3                        | C005 1.4530(15) | C6                        | C11 1.405(2)   |
| C1                        | C2 1.378(2)     | C7                        | C8 1.384(2)    |
| C1                        | C15 1.3964(19)  | C8                        | C9 1.367(3)    |
| C00B                      | C00D 1.516(2)   | C9                        | C10 1.373(3)   |
| C00B                      | C005 1.5282(18) | C10                       | C11 1.395(2)   |
| C00D                      | C00O 1.511(2)   |                           |                |

**Bond Angles for mo\_20jl\_CGdavePhos\_RT\_solve\_a.**

| <b>Atom Atom Atom Angle/°</b> |    |                | <b>Atom Atom Atom Angle/°</b> |      |                |
|-------------------------------|----|----------------|-------------------------------|------|----------------|
| C005                          | P1 | C009 92.17(6)  | C4                            | C5   | C15 119.31(13) |
| C15                           | P1 | C005 106.51(6) | C15                           | C5   | C6 122.50(12)  |
| C15                           | P1 | C009 103.09(6) | O3                            | C005 | P1 115.97(8)   |

|                |            |                |            |
|----------------|------------|----------------|------------|
| C00D O1 C009   | 114.98(10) | O3 C005 C00B   | 107.23(10) |
| C00D O2 C00F   | 111.34(10) | O3 C005 C00G   | 105.49(11) |
| C11 N2 C13     | 115.90(17) | C00B C005 P1   | 103.93(9)  |
| C11 N2 C14     | 114.67(17) | C00G C005 P1   | 111.12(10) |
| C14 N2 C13     | 113.0(2)   | C00G C005 C00B | 113.28(12) |
| C00F O3 C005   | 115.25(10) | C7 C6 C5       | 119.08(14) |
| C2 C1 C15      | 121.51(14) | C7 C6 C11      | 119.01(14) |
| C00D C00B C005 | 110.27(11) | C11 C6 C5      | 121.89(13) |
| O1 C00D C00B   | 112.23(11) | C8 C7 C6       | 121.53(17) |
| O1 C00D C00O   | 105.85(13) | C9 C8 C7       | 119.28(18) |
| O2 C00D O1     | 110.50(12) | C8 C9 C10      | 120.51(17) |
| O2 C00D C00B   | 107.77(12) | O1 C009 P1     | 105.05(9)  |
| O2 C00D C00O   | 107.33(12) | O1 C009 C00E   | 107.96(11) |
| C00O C00D C00B | 113.07(13) | O1 C009 C00L   | 106.10(12) |
| C009 C00E C00F | 110.95(11) | C00E C009 P1   | 113.84(10) |
| O2 C00F C00E   | 107.90(12) | C00L C009 P1   | 110.65(11) |
| O2 C00F C00P   | 107.04(12) | C00L C009 C00E | 112.62(14) |
| O3 C00F O2     | 110.32(11) | C9 C10 C11     | 121.17(18) |
| O3 C00F C00E   | 111.63(11) | C6 C11 N2      | 119.38(14) |
| O3 C00F C00P   | 106.05(13) | C10 C11 N2     | 122.12(16) |
| C00P C00F C00E | 113.81(13) | C10 C11 C6     | 118.49(16) |
| C3 C2 C1       | 119.72(15) | C1 C15 P1      | 125.85(10) |
| C4 C3 C2       | 120.03(14) | C1 C15 C5      | 118.14(12) |
| C3 C4 C5       | 121.09(14) | C5 C15 P1      | 116.00(10) |
| C4 C5 C6       | 118.18(13) |                |            |

**Torsion Angles for mo\_20jl\_CGdavePhos\_RT\_solve\_a.**

| A                   | B         | C    | D   | Angle/°     | A                   | B         | C    | D   | Angle/°     |
|---------------------|-----------|------|-----|-------------|---------------------|-----------|------|-----|-------------|
| C1                  | C2        | C3   | C4  | 3.0(3)      | C005 O3             | C00F      | C00P |     | -172.62(11) |
| C00D O1             | C009      | P1   |     | -69.44(13)  | C005 C00B C00D O1   |           |      |     | -62.77(15)  |
| C00D O1             | C009      | C00E |     | 52.37(16)   | C005 C00B C00D O2   |           |      |     | 59.12(14)   |
| C00D O1             | C009      | C00L |     | 173.32(13)  | C005 C00B C00D C00O |           |      |     | 177.57(12)  |
| C00D O2             | C00F      | O3   |     | 60.65(15)   | C6                  | C5        | C15  | P1  | 5.98(19)    |
| C00D O2             | C00F      | C00E |     | -61.54(14)  | C6                  | C5        | C15  | C1  | -175.07(14) |
| C00D O2             | C00F      | C00P |     | 175.59(13)  | C6                  | C7        | C8   | C9  | 0.1(2)      |
| C00D C00B C005 P1   |           |      |     | 69.85(12)   | C7                  | C6        | C11  | N2  | 179.69(14)  |
| C00D C00B C005 O3   |           |      |     | -53.47(14)  | C7                  | C6        | C11  | C10 | 0.8(2)      |
| C00D C00B C005 C00G |           |      |     | -169.43(12) | C7                  | C8        | C9   | C10 | -0.3(3)     |
| C00F O2             | C00D O1   |      |     | 60.82(15)   | C8                  | C9        | C10  | C11 | 0.8(3)      |
| C00F O2             | C00D C00B |      |     | -62.14(14)  | C9                  | C10       | C11  | N2  | -179.88(16) |
| C00F O2             | C00D C00O |      |     | 175.79(13)  | C9                  | C10       | C11  | C6  | -1.1(2)     |
| C00F O3             | C005 P1   |      |     | -62.20(12)  | C009 P1             | C005 O3   |      |     | 50.25(10)   |
| C00F O3             | C005 C00B |      |     | 53.35(14)   | C009 P1             | C005 C00B |      |     | -67.15(9)   |
| C00F O3             | C005 C00G |      |     | 174.37(11)  | C009 P1             | C005 C00G |      |     | 170.69(10)  |
| C00F C00E C009 P1   |           |      |     | 63.85(14)   | C009 P1             | C15       | C1   |     | -72.61(14)  |
| C00F C00E C009 O1   |           |      |     | -52.36(15)  | C009 P1             | C15       | C5   |     | 106.24(12)  |
| C00F C00E C009 C00L |           |      |     | -169.15(12) | C009 O1             | C00D O2   |      |     | -56.71(15)  |
| C2                  | C1        | C15  | P1  | 176.58(13)  | C009 O1             | C00D C00B |      |     | 63.61(16)   |
| C2                  | C1        | C15  | C5  | -2.3(2)     | C009 O1             | C00D C00O |      |     | -172.61(13) |
| C2                  | C3        | C4   | C5  | -0.3(3)     | C009 C00E C00F O2   |           |      |     | 57.99(15)   |
| C3                  | C4        | C5   | C6  | 176.27(17)  | C009 C00E C00F O3   |           |      |     | -63.39(15)  |
| C3                  | C4        | C5   | C15 | -3.6(3)     | C009 C00E C00F C00P |           |      |     | 176.61(13)  |
| C4                  | C5        | C6   | C7  | 64.36(19)   | C11                 | C6        | C7   | C8  | -0.4(2)     |
| C4                  | C5        | C6   | C11 | -114.14(17) | C13                 | N2        | C11  | C6  | -153.70(16) |

|      |    |      |      |             |     |    |      |      |             |
|------|----|------|------|-------------|-----|----|------|------|-------------|
| C4   | C5 | C15  | P1   | -174.11(13) | C13 | N2 | C11  | C10  | 25.1(2)     |
| C4   | C5 | C15  | C1   | 4.8(2)      | C15 | P1 | C005 | O3   | -54.08(11)  |
| C5   | C6 | C7   | C8   | -178.92(14) | C15 | P1 | C005 | C00B | -171.48(9)  |
| C5   | C6 | C11  | N2   | -1.8(2)     | C15 | P1 | C005 | C00G | 66.35(11)   |
| C5   | C6 | C11  | C10  | 179.33(13)  | C15 | P1 | C009 | O1   | 173.40(9)   |
| C005 | P1 | C009 | O1   | 65.89(9)    | C15 | P1 | C009 | C00E | 55.51(11)   |
| C005 | P1 | C009 | C00E | -52.00(10)  | C15 | P1 | C009 | C00L | -72.51(12)  |
| C005 | P1 | C009 | C00L | 179.98(11)  | C15 | C1 | C2   | C3   | -1.7(3)     |
| C005 | P1 | C15  | C1   | 23.67(15)   | C15 | C5 | C6   | C7   | -115.73(16) |
| C005 | P1 | C15  | C5   | -157.47(11) | C15 | C5 | C6   | C11  | 65.8(2)     |
| C005 | O3 | C00F | O2   | -57.06(14)  | C14 | N2 | C11  | C6   | 71.8(2)     |
| C005 | O3 | C00F | C00E | 62.91(14)   | C14 | N2 | C11  | C10  | -109.4(2)   |

**Hydrogen Atom Coordinates ( $\text{\AA}\times 10^4$ ) and Isotropic Displacement Parameters ( $\text{\AA}^2\times 10^3$ ) for mo\_20jl\_CGdavePhos\_RT\_solve\_a.**

| Atom | x       | y        | z       | U(eq) |
|------|---------|----------|---------|-------|
| H1   | 5374.26 | 8540.58  | 5348.58 | 51    |
| H00A | 7514.42 | 7862.34  | 5611.94 | 47    |
| H00B | 7559.04 | 7113.6   | 6205.24 | 47    |
| H00C | 5488.79 | 5844.21  | 5140.63 | 54    |
| H00D | 5794.81 | 4400.34  | 4949.42 | 54    |
| H00E | 6385.05 | 10202.7  | 5894.85 | 74    |
| H00F | 6941    | 10315.14 | 5678.76 | 74    |
| H00G | 7056.61 | 9850.24  | 6321.12 | 74    |
| H00H | 6309.11 | 3518.13  | 6427.19 | 92    |
| H00I | 5977.13 | 2810.31  | 5808.86 | 92    |
| H00J | 5632.93 | 4032.02  | 6061.19 | 92    |
| H00K | 8008.87 | 4580.54  | 5919.37 | 92    |

|      |         |          |         |     |
|------|---------|----------|---------|-----|
| H00L | 7950.5  | 5396.07  | 5334.44 | 92  |
| H00M | 7629.57 | 3765.06  | 5331.52 | 92  |
| H00N | 6095.94 | 7453.71  | 4097.21 | 92  |
| H00O | 5471    | 7326.03  | 4202.79 | 92  |
| H00P | 5769.06 | 5811.51  | 4048.75 | 92  |
| H2   | 4391.57 | 9264.56  | 5265.64 | 65  |
| H3   | 4027.53 | 8642.11  | 5992.45 | 76  |
| H4   | 4669.54 | 7487.22  | 6827.72 | 66  |
| H7   | 5342.25 | 4672.87  | 7103.96 | 60  |
| H8   | 5932.46 | 3584.82  | 7981.55 | 76  |
| H9   | 6775.06 | 4938.84  | 8584.92 | 82  |
| H10  | 7039.17 | 7339.73  | 8315.19 | 74  |
| H13A | 7248.17 | 9655.22  | 8025.21 | 145 |
| H13B | 7212.42 | 10373.41 | 7431.28 | 145 |
| H13C | 7397.71 | 8598.47  | 7572.85 | 145 |
| H14A | 5661.56 | 9916.5   | 7167.41 | 158 |
| H14B | 6167.35 | 11156.91 | 7179.38 | 158 |
| H14C | 6131.28 | 10516.58 | 7759.71 | 158 |

**Table S3:** Crystal data and refinement parameters for SPhos<sup>[1]</sup> (**5**) and tetramethyl-<sup>t</sup>BuXPhos<sup>[2]</sup> (**11**).<sup>a</sup>

|                   |                                                                                     |                                                                                       |
|-------------------|-------------------------------------------------------------------------------------|---------------------------------------------------------------------------------------|
| Crystal structure | 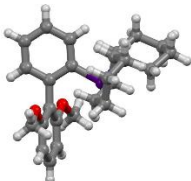 |  |
| Ligand            | SPhos                                                                               | tetramethyl- <sup>t</sup> BuXPhos                                                     |
| CCDC code         | IYUREB                                                                              | YUTZOD                                                                                |
| Empirical formula | C <sub>26</sub> H <sub>35</sub> O <sub>2</sub> P                                    | C <sub>33</sub> H <sub>53</sub> P                                                     |
| Formula weight    | 410.51                                                                              | 480.72                                                                                |
| Temperature/K     | 100                                                                                 | 100(2)                                                                                |

|                                             |                                                               |                                                            |
|---------------------------------------------|---------------------------------------------------------------|------------------------------------------------------------|
| Crystal system                              | orthorhombic                                                  | N/A                                                        |
| Space group                                 | <i>Pbca</i>                                                   | <i>P</i> -1                                                |
| a/Å                                         | 16.2168(15)                                                   | 11.2779(5)                                                 |
| b/Å                                         | 15.5468(12)                                                   | 15.8314(7)                                                 |
| c/Å                                         | 17.9870(15)                                                   | 17.6683(8)                                                 |
| $\alpha$ /°                                 | 90                                                            | 76.5310(10)                                                |
| $\beta$ /°                                  | 90                                                            | 83.3630(10)                                                |
| $\gamma$ /°                                 | 90                                                            | 79.6560(10)                                                |
| Volume/Å <sup>3</sup>                       | 4534.9(7)                                                     | 3009.0(2)                                                  |
| Z                                           | 8                                                             | 4                                                          |
| $\rho_{\text{calc}}/\text{cm}^3$            | 1.203                                                         | 1.061                                                      |
| $\mu/\text{mm}^{-1}$                        | 0.140                                                         | 0.109                                                      |
| F(000)                                      | 1776.0                                                        | 1064.0                                                     |
| Crystal size/mm <sup>3</sup>                | 0.33 × 0.3 × 0.29                                             | 0.40 × 0.33 × 0.20                                         |
| Radiation                                   | MoK $\alpha$ ( $\lambda$ = 0.71073)                           | MoK $\alpha$ ( $\lambda$ = 0.71073)                        |
| 2 $\theta$ range for data collection/°      | 4.53 to 54.238                                                | 2.38 to 41.62                                              |
| Index ranges                                | -20 ≤ h ≤ 20, -18 ≤ k ≤ 19, -22 ≤ l ≤ 22                      | -11 ≤ h ≤ 5, -15 ≤ k ≤ 15, -17 ≤ l ≤ 17                    |
| Reflections collected                       | 23770                                                         | 10069                                                      |
| Independent reflections                     | 5001 [R <sub>int</sub> = 0.0587, R <sub>sigma</sub> = 0.0523] | 5990 [R <sub>int</sub> = 0.0216, R <sub>sigma</sub> = N/A] |
| Data/restraints/parameters                  | 5001/0/264                                                    | 5990/0/645                                                 |
| Goodness-of-fit on F <sup>2</sup>           | 1.010                                                         | 1.030                                                      |
| Final R indexes [ $I \geq 2\sigma(I)$ ]     | R <sub>1</sub> = 0.0436, wR <sub>2</sub> = 0.0897             | R <sub>1</sub> = 0.0602, wR <sub>2</sub> = 0.1657          |
| Final R indexes [all data]                  | R <sub>1</sub> = 0.0741, wR <sub>2</sub> = 0.1035             | R <sub>1</sub> = 0.0667, wR <sub>2</sub> = 0.1740          |
| Largest diff. peak/hole / e Å <sup>-3</sup> | 0.35/-0.30                                                    | 1.08/-0.34                                                 |

<sup>a</sup>The CIF files were retrieved from CCDC as per references.

#### Catalytic evaluation

**Table S4:** Determination of suitable conditions for room temperature coupling reactions.<sup>a</sup>

| Entry     | Pd source                  | ligand   | Base                            | solvent    | Yield (%) <sup>b</sup> |
|-----------|----------------------------|----------|---------------------------------|------------|------------------------|
| 1         | Pd(OAc) <sub>2</sub>       | <b>1</b> | KF                              | THF        | 69                     |
| 2         | Pd(OAc) <sub>2</sub>       | <b>3</b> | KF                              | THF        | 91                     |
| 3         | Pd(OAc) <sub>2</sub>       | <b>1</b> | CsF                             | THF        | 32                     |
| 4         | Pd(OAc) <sub>2</sub>       | <b>3</b> | CsF                             | THF        | 57                     |
| 5         | Pd(OAc) <sub>2</sub>       | <b>1</b> | TBAF                            | THF        | 40                     |
| 6         | Pd(OAc) <sub>2</sub>       | <b>3</b> | TBAF                            | THF        | 42                     |
| 7         | Pd(OAc) <sub>2</sub>       | <b>1</b> | K <sub>3</sub> PO <sub>4</sub>  | THF        | 62                     |
| 8         | Pd(OAc) <sub>2</sub>       | <b>3</b> | K <sub>3</sub> PO <sub>4</sub>  | THF        | 90                     |
| 9         | Pd(OAc) <sub>2</sub>       | <b>1</b> | K <sub>2</sub> CO <sub>3</sub>  | THF        | 71                     |
| 10        | Pd(OAc) <sub>2</sub>       | <b>3</b> | K <sub>2</sub> CO <sub>3</sub>  | THF        | 40                     |
| 11        | Pd(OAc) <sub>2</sub>       | <b>1</b> | Cs <sub>2</sub> CO <sub>3</sub> | THF        | 37                     |
| 12        | Pd(OAc) <sub>2</sub>       | <b>3</b> | Cs <sub>2</sub> CO <sub>3</sub> | THF        | 41                     |
| 13        | Pd(OAc) <sub>2</sub>       | <b>1</b> | Cy <sub>2</sub> NMe             | THF        | 49                     |
| 14        | Pd(OAc) <sub>2</sub>       | <b>3</b> | Cy <sub>2</sub> NMe             | THF        | 31                     |
| <b>15</b> | <b>Pd(OAc)<sub>2</sub></b> | <b>1</b> | <b>KOH</b>                      | <b>THF</b> | <b>100</b>             |
| <b>16</b> | <b>Pd(OAc)<sub>2</sub></b> | <b>3</b> | <b>KOH</b>                      | <b>THF</b> | <b>100</b>             |
| 17        | Pd(OAc) <sub>2</sub>       | <b>1</b> | KOH                             | Toluene    | 99                     |
| 18        | Pd(OAc) <sub>2</sub>       | <b>3</b> | KOH                             | Toluene    | 89                     |
| 19        | Pd(OAc) <sub>2</sub>       | <b>1</b> | K <sub>3</sub> PO <sub>4</sub>  | Toluene    | 76                     |
| 20        | Pd(OAc) <sub>2</sub>       | <b>3</b> | K <sub>3</sub> PO <sub>4</sub>  | Toluene    | 72                     |
| 21        | Pd(OAc) <sub>2</sub>       | <b>1</b> | K <sub>2</sub> CO <sub>3</sub>  | Toluene    | 48                     |
| 22        | Pd(OAc) <sub>2</sub>       | <b>3</b> | K <sub>2</sub> CO <sub>3</sub>  | Toluene    | 61                     |
| 23        | Pd(OAc) <sub>2</sub>       | <b>1</b> | KOH                             | Dioxane    | 86                     |
| 24        | Pd(OAc) <sub>2</sub>       | <b>3</b> | KOH                             | Dioxane    | 88                     |
| 25        | Pd(OAc) <sub>2</sub>       | <b>1</b> | K <sub>3</sub> PO <sub>4</sub>  | Dioxane    | 83                     |
| 26        | Pd(OAc) <sub>2</sub>       | <b>3</b> | K <sub>3</sub> PO <sub>4</sub>  | Dioxane    | 85                     |
| 27        | Pd(OAc) <sub>2</sub>       | <b>1</b> | K <sub>2</sub> CO <sub>3</sub>  | Dioxane    | 2                      |
| 28        | Pd(OAc) <sub>2</sub>       | <b>3</b> | K <sub>2</sub> CO <sub>3</sub>  | Dioxane    | 7                      |
| 29        | Pd(OAc) <sub>2</sub>       | <b>1</b> | KOH                             | DMA        | 71                     |
| 30        | Pd(OAc) <sub>2</sub>       | <b>3</b> | KOH                             | DMA        | 95                     |
| 31        | Pd(OAc) <sub>2</sub>       | <b>1</b> | K <sub>3</sub> PO <sub>4</sub>  | DMA        | 0                      |
| 32        | Pd(OAc) <sub>2</sub>       | <b>3</b> | K <sub>3</sub> PO <sub>4</sub>  | DMA        | 28                     |
| 33        | Pd(OAc) <sub>2</sub>       | <b>1</b> | K <sub>2</sub> CO <sub>3</sub>  | DMA        | 21                     |
| 34        | Pd(OAc) <sub>2</sub>       | <b>3</b> | K <sub>2</sub> CO <sub>3</sub>  | DMA        | 6                      |
| 35        | Pd(OAc) <sub>2</sub>       | <b>1</b> | KOH                             | DMF        | 72                     |
| 36        | Pd(OAc) <sub>2</sub>       | <b>3</b> | KOH                             | DMF        | 78                     |
| 19        | Pd(OAc) <sub>2</sub>       | <b>1</b> | K <sub>3</sub> PO <sub>4</sub>  | DMF        | 17                     |
| 20        | Pd(OAc) <sub>2</sub>       | <b>3</b> | K <sub>3</sub> PO <sub>4</sub>  | DMF        | 49                     |
| 21        | Pd(OAc) <sub>2</sub>       | <b>1</b> | K <sub>2</sub> CO <sub>3</sub>  | DMF        | 11                     |
| 22        | Pd(OAc) <sub>2</sub>       | <b>3</b> | K <sub>2</sub> CO <sub>3</sub>  | DMF        | 23                     |

Reaction conditions: aryl bromide (1 equiv.), arylboronic acid (1.5 equiv.), base (3 equiv.), 1 mol% Pd(OAc)<sub>2</sub>, 2 mol% L, Ar, 12 h, rt. KOH was dissolved in MeOH (2M base solution). <sup>b</sup>GC yield from an average of two runs with <5% deviation. In all cases coupling was selective to the desired product. Thus, conversion = GC yield

**Table S5:** Substrate screening

| Entry | ArX                                                                                 | ArB(OH) <sub>2</sub>                                                                | Product                                                                             | Ligand                 | Conversion (%) | Selectivity (%) <sup>a</sup> | GC Yield (%) |
|-------|-------------------------------------------------------------------------------------|-------------------------------------------------------------------------------------|-------------------------------------------------------------------------------------|------------------------|----------------|------------------------------|--------------|
| 1     |    |    |    | <b>1</b>               | 100            | 100                          | 100          |
|       |                                                                                     |                                                                                     |                                                                                     | <b>2</b>               | 100            | 96                           | 96           |
|       |                                                                                     |                                                                                     |                                                                                     | <b>3</b>               | 100            | 97                           | 97           |
|       |                                                                                     |                                                                                     |                                                                                     | <b>4</b>               | 51             | 96                           | 49           |
| 2     |    |    |    | <b>1</b>               | 100            | 100                          | 100          |
|       |                                                                                     |                                                                                     |                                                                                     | <b>2</b>               | 87             | 85                           | 74           |
|       |                                                                                     |                                                                                     |                                                                                     | <b>3</b>               | 100            | 97                           | 97           |
|       |                                                                                     |                                                                                     |                                                                                     | <b>4</b>               | 14             | 80                           | 11           |
|       |                                                                                     |                                                                                     |                                                                                     | <b>PPh<sub>3</sub></b> | 26             | 44                           | 11           |
| 3     |    |    |    | <b>1</b>               | 100            | 98                           | 98           |
|       |                                                                                     |                                                                                     |                                                                                     | <b>2</b>               | 22             | 40                           | 9            |
|       |                                                                                     |                                                                                     |                                                                                     | <b>3</b>               | 100            | 93                           | 93           |
|       |                                                                                     |                                                                                     |                                                                                     | <b>4</b>               | 37             | 87                           | 32           |
|       |                                                                                     |                                                                                     |                                                                                     | <b>PPh<sub>3</sub></b> | 32             | 28                           | 9            |
| 4     |  |  |   | <b>1</b>               | 100            | 76                           | 76           |
|       |                                                                                     |                                                                                     |                                                                                     | <b>2</b>               | 41             | 11                           | 4            |
|       |                                                                                     |                                                                                     |                                                                                     | <b>3</b>               | 82             | 65                           | 53           |
|       |                                                                                     |                                                                                     |                                                                                     | <b>4</b>               | 31             | 46                           | 14           |
|       |                                                                                     |                                                                                     |                                                                                     | <b>PPh<sub>3</sub></b> | 11             | 46                           | 5            |
| 5     |  |  |  | <b>1</b>               | 97             | 90                           | 87           |
|       |                                                                                     |                                                                                     |                                                                                     | <b>2</b>               | 100            | 91                           | 91           |
|       |                                                                                     |                                                                                     |                                                                                     | <b>3</b>               | 100            | 96                           | 96           |
|       |                                                                                     |                                                                                     |                                                                                     | <b>4</b>               | 57             | 94                           | 54           |
| 6     |  |  |  | <b>1</b>               | 100            | 98                           | 98           |
|       |                                                                                     |                                                                                     |                                                                                     | <b>2</b>               | 27             | 49                           | 14           |
|       |                                                                                     |                                                                                     |                                                                                     | <b>3</b>               | 100            | 95                           | 95           |
|       |                                                                                     |                                                                                     |                                                                                     | <b>4</b>               | 32             | 70                           | 22           |
|       |                                                                                     |                                                                                     |                                                                                     | <b>PPh<sub>3</sub></b> | 45             | 27                           | 28           |
| 7     |  |  |  | <b>1</b>               | 100            | 97                           | 97           |
|       |                                                                                     |                                                                                     |                                                                                     | <b>2</b>               | 48             | 20                           | 10           |
|       |                                                                                     |                                                                                     |                                                                                     | <b>3</b>               | 100            | 94                           | 94           |
|       |                                                                                     |                                                                                     |                                                                                     | <b>4</b>               | 15             | 49                           | 7            |
|       |                                                                                     |                                                                                     |                                                                                     | <b>PPh<sub>3</sub></b> | 12             | 13                           | 2            |
| 8     |  |  |  | <b>1</b>               | 100            | 100                          | 100          |
|       |                                                                                     |                                                                                     |                                                                                     | <b>2</b>               | 100            | 75                           | 75           |
|       |                                                                                     |                                                                                     |                                                                                     | <b>3</b>               | 100            | 95                           | 95           |



|                       |                                                                                     |                                                                                     |                                                                                     |                        |     |     |     |
|-----------------------|-------------------------------------------------------------------------------------|-------------------------------------------------------------------------------------|-------------------------------------------------------------------------------------|------------------------|-----|-----|-----|
|                       |                                                                                     |                                                                                     |                                                                                     | <b>4</b>               | 90  | 80  | 72  |
| <b>9<sup>b</sup></b>  | 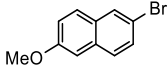   |    |    | <b>1</b>               | 100 | -   | -   |
|                       |                                                                                     |                                                                                     |                                                                                     | <b>2</b>               | 100 | -   | -   |
|                       |                                                                                     |                                                                                     |                                                                                     | <b>3</b>               | 100 | -   | -   |
|                       |                                                                                     |                                                                                     |                                                                                     | <b>4</b>               | 70  | -   | -   |
| <b>10</b>             |    |    |    | <b>1</b>               | 100 | 93  | 93  |
|                       |                                                                                     |                                                                                     |                                                                                     | <b>2</b>               | 100 | 88  | 88  |
|                       |                                                                                     |                                                                                     |                                                                                     | <b>3</b>               | 100 | 91  | 91  |
|                       |                                                                                     |                                                                                     |                                                                                     | <b>4</b>               | 95  | 76  | 72  |
| <b>11</b>             |    |    |    | <b>1</b>               | 76  | 85  | 64  |
|                       |                                                                                     |                                                                                     |                                                                                     | <b>2</b>               | 19  | 40  | 11  |
|                       |                                                                                     |                                                                                     |                                                                                     | <b>3</b>               | 81  | 93  | 76  |
|                       |                                                                                     |                                                                                     |                                                                                     | <b>4</b>               | 40  | 60  | 24  |
| <b>12</b>             |   |   |   | <b>1</b>               | 89  | 97  | 86  |
|                       |                                                                                     |                                                                                     |                                                                                     | <b>2</b>               | 79  | 0   | 0   |
|                       |                                                                                     |                                                                                     |                                                                                     | <b>3</b>               | 74  | 0   | 0   |
|                       |                                                                                     |                                                                                     |                                                                                     | <b>4</b>               | 67  | 0   | 0   |
|                       |                                                                                     |                                                                                     |                                                                                     | <b>5</b>               | 82  | 0   | 0   |
|                       |                                                                                     |                                                                                     |                                                                                     | <b>6</b>               | 75  | 0   | 0   |
|                       |                                                                                     |                                                                                     |                                                                                     | <b>7</b>               | 75  | 0   | 0   |
|                       |                                                                                     |                                                                                     |                                                                                     | <b>8</b>               | 67  | 0   | 0   |
| <b>13<sup>c</sup></b> |  |  |  | <b>1</b>               | 43  | 100 | 20  |
|                       |                                                                                     |                                                                                     |                                                                                     | <b>2</b>               | 88  | 100 | 88  |
|                       |                                                                                     |                                                                                     |                                                                                     | <b>3</b>               | 91  | 100 | 91  |
|                       |                                                                                     |                                                                                     |                                                                                     | <b>4</b>               | 94  | 100 | 94  |
|                       |                                                                                     |                                                                                     |                                                                                     | <b>5</b>               | 89  | 100 | 89  |
|                       |                                                                                     |                                                                                     |                                                                                     | <b>6</b>               | 87  | 100 | 87  |
|                       |                                                                                     |                                                                                     |                                                                                     | <b>7</b>               | 100 | 100 | 100 |
|                       |                                                                                     |                                                                                     |                                                                                     | <b>8</b>               | 74  | 100 | 74  |
| <b>14</b>             |  |  |  | <b>1</b>               | 100 | 100 | 100 |
|                       |                                                                                     |                                                                                     |                                                                                     | <b>2</b>               | 84  | 91  | 76  |
|                       |                                                                                     |                                                                                     |                                                                                     | <b>3</b>               | 73  | 34  | 25  |
|                       |                                                                                     |                                                                                     |                                                                                     | <b>4</b>               | 100 | 34  | 34  |
|                       |                                                                                     |                                                                                     |                                                                                     | <b>5</b>               | 61  | 87  | 53  |
|                       |                                                                                     |                                                                                     |                                                                                     | <b>6</b>               | 30  | 92  | 28  |
|                       |                                                                                     |                                                                                     |                                                                                     | <b>7</b>               | 100 | 0   | 0   |
|                       |                                                                                     |                                                                                     |                                                                                     | <b>8</b>               | 100 | 0   | 0   |
|                       |                                                                                     |                                                                                     |                                                                                     | <b>PPh<sub>3</sub></b> | 24  | 83  | 20  |
| <b>15<sup>c</sup></b> |                                                                                     |                                                                                     |                                                                                     | <b>1</b>               | 43  | 100 | 43  |
|                       |                                                                                     |                                                                                     |                                                                                     | <b>2</b>               | 15  | 100 | 15  |

|                 |                                                                                     |                                                                                     |                                                                                     |                        |     |     |     |
|-----------------|-------------------------------------------------------------------------------------|-------------------------------------------------------------------------------------|-------------------------------------------------------------------------------------|------------------------|-----|-----|-----|
|                 |    |    |    | <b>3</b>               | 88  | 100 | 88  |
|                 |                                                                                     |                                                                                     |                                                                                     | <b>4</b>               | 85  | 100 | 85  |
|                 |                                                                                     |                                                                                     |                                                                                     | <b>5</b>               | 22  | 100 | 22  |
|                 |                                                                                     |                                                                                     |                                                                                     | <b>6</b>               | 18  | 100 | 18  |
|                 |                                                                                     |                                                                                     |                                                                                     | <b>7</b>               | 90  | 100 | 90  |
|                 |                                                                                     |                                                                                     |                                                                                     | <b>8</b>               | 35  | 100 | 35  |
|                 |                                                                                     |                                                                                     |                                                                                     | <b>PPh<sub>3</sub></b> | 11  | 100 | 11  |
| 16 <sup>c</sup> |    |    |    | <b>1</b>               | 59  | 100 | 59  |
|                 |                                                                                     |                                                                                     |                                                                                     | <b>2</b>               | 100 | 100 | 100 |
|                 |                                                                                     |                                                                                     |                                                                                     | <b>3</b>               | 91  | 100 | 91  |
|                 |                                                                                     |                                                                                     |                                                                                     | <b>4</b>               | 85  | 100 | 85  |
|                 |                                                                                     |                                                                                     |                                                                                     | <b>5</b>               | 96  | 100 | 96  |
|                 |                                                                                     |                                                                                     |                                                                                     | <b>6</b>               | 88  | 100 | 88  |
|                 |                                                                                     |                                                                                     |                                                                                     | <b>7</b>               | 91  | 100 | 91  |
|                 |                                                                                     |                                                                                     |                                                                                     | <b>8</b>               | 65  | 100 | 65  |
| 17              |    |    |    | <b>2</b>               | 78  | 100 | 78  |
|                 |                                                                                     |                                                                                     |                                                                                     | <b>4</b>               | 100 | 100 | 100 |
|                 |                                                                                     |                                                                                     |                                                                                     | <b>5</b>               | 93  | 100 | 93  |
|                 |                                                                                     |                                                                                     |                                                                                     | <b>7</b>               | 75  | 100 | 75  |
| 18              |  |  |  | <b>1</b>               | 100 | 100 | 100 |
|                 |                                                                                     |                                                                                     |                                                                                     | <b>3</b>               | 84  | 100 | 84  |
|                 |                                                                                     |                                                                                     |                                                                                     | <b>5</b>               | 84  | 92  | 78  |
|                 |                                                                                     |                                                                                     |                                                                                     | <b>7</b>               | 37  | 100 | 37  |
| 19              |  |  |  | <b>2</b>               | 95  | 100 | 95  |
|                 |                                                                                     |                                                                                     |                                                                                     | <b>3</b>               | 12  | 100 | 12  |
|                 |                                                                                     |                                                                                     |                                                                                     | <b>5</b>               | 30  | 100 | 30  |
|                 |                                                                                     |                                                                                     |                                                                                     | <b>7</b>               | 67  | 100 | 67  |
| 20              |  |  |  | <b>2</b>               | 20  | 100 | 20  |
|                 |                                                                                     |                                                                                     |                                                                                     | <b>4</b>               | 0   | 0   | 0   |
|                 |                                                                                     |                                                                                     |                                                                                     | <b>5</b>               | 0   | 0   | 0   |
|                 |                                                                                     |                                                                                     |                                                                                     | <b>7</b>               | 14  | 0   | 0   |
| 21              |  |  |  | <b>1</b>               | 100 | 100 | 100 |
|                 |                                                                                     |                                                                                     |                                                                                     | <b>3</b>               | 0   | 0   | 0   |
|                 |                                                                                     |                                                                                     |                                                                                     | <b>5</b>               | 15  | 0   | 0   |
|                 |                                                                                     |                                                                                     |                                                                                     | <b>7</b>               | 100 | 0   | 0   |
| 22              |  |  |  | <b>2</b>               | 53  | 100 | 53  |
|                 |                                                                                     |                                                                                     |                                                                                     | <b>3</b>               | 0   | 0   | 0   |
|                 |                                                                                     |                                                                                     |                                                                                     | <b>5</b>               | 9   | 36  | 3   |
|                 |                                                                                     |                                                                                     |                                                                                     | <b>7</b>               | 10  | 57  | 6   |

|                        |                                                                                     |                                                                                     |                                                                                     |                        |                                                                                   |                                                                                   |                                                                                   |
|------------------------|-------------------------------------------------------------------------------------|-------------------------------------------------------------------------------------|-------------------------------------------------------------------------------------|------------------------|-----------------------------------------------------------------------------------|-----------------------------------------------------------------------------------|-----------------------------------------------------------------------------------|
| 23                     |    |    |    | <b>1</b>               | 100                                                                               | 100                                                                               | 100                                                                               |
|                        |                                                                                     |                                                                                     |                                                                                     | <b>2</b>               | 100                                                                               | 100                                                                               | 100                                                                               |
|                        |                                                                                     |                                                                                     |                                                                                     | <b>3</b>               | 100                                                                               | 100                                                                               | 100                                                                               |
|                        |                                                                                     |                                                                                     |                                                                                     | <b>5</b>               | 100                                                                               | 100                                                                               | 100                                                                               |
|                        |                                                                                     |                                                                                     |                                                                                     | <b>6</b>               | 100                                                                               | 100                                                                               | 100                                                                               |
|                        |                                                                                     |                                                                                     |                                                                                     | <b>7</b>               | 100                                                                               | 100                                                                               | 100                                                                               |
|                        |                                                                                     |                                                                                     |                                                                                     | <b>PPh<sub>3</sub></b> | 0                                                                                 | 0                                                                                 | 0                                                                                 |
| 24                     |    |    |    | <b>1</b>               | 100                                                                               | 100                                                                               | 100                                                                               |
|                        |                                                                                     |                                                                                     |                                                                                     | <b>2</b>               | 100                                                                               | 100                                                                               | 100                                                                               |
|                        |                                                                                     |                                                                                     |                                                                                     | <b>3</b>               | 100                                                                               | 100                                                                               | 100                                                                               |
|                        |                                                                                     |                                                                                     |                                                                                     | <b>5</b>               | 100                                                                               | 100                                                                               | 100                                                                               |
|                        |                                                                                     |                                                                                     |                                                                                     | <b>6</b>               | 100                                                                               | 100                                                                               | 100                                                                               |
|                        |                                                                                     |                                                                                     |                                                                                     | <b>7</b>               | 0                                                                                 | 0                                                                                 | 0                                                                                 |
|                        |                                                                                     |                                                                                     |                                                                                     | 25                     |  |  |  |
| <b>2</b>               | 91                                                                                  | 100                                                                                 | 91                                                                                  |                        |                                                                                   |                                                                                   |                                                                                   |
| <b>3</b>               | 90                                                                                  | 100                                                                                 | 90                                                                                  |                        |                                                                                   |                                                                                   |                                                                                   |
| <b>5</b>               | 98                                                                                  | 100                                                                                 | 98                                                                                  |                        |                                                                                   |                                                                                   |                                                                                   |
| <b>6</b>               | 99                                                                                  | 100                                                                                 | 99                                                                                  |                        |                                                                                   |                                                                                   |                                                                                   |
| <b>7</b>               | 53                                                                                  | 100                                                                                 | 53                                                                                  |                        |                                                                                   |                                                                                   |                                                                                   |
| <b>PPh<sub>3</sub></b> | 0                                                                                   | 0                                                                                   | 0                                                                                   |                        |                                                                                   |                                                                                   |                                                                                   |
| 26                     |  |  |  | <b>1</b>               | 100                                                                               | 100                                                                               | 100                                                                               |
|                        |                                                                                     |                                                                                     |                                                                                     | <b>2</b>               | 100                                                                               | 100                                                                               | 100                                                                               |
|                        |                                                                                     |                                                                                     |                                                                                     | <b>3</b>               | 100                                                                               | 100                                                                               | 100                                                                               |
|                        |                                                                                     |                                                                                     |                                                                                     | <b>5</b>               | 100                                                                               | 100                                                                               | 100                                                                               |
|                        |                                                                                     |                                                                                     |                                                                                     | <b>6</b>               | 100                                                                               | 100                                                                               | 100                                                                               |
|                        |                                                                                     |                                                                                     |                                                                                     | <b>7</b>               | 0                                                                                 | 0                                                                                 | 0                                                                                 |

<sup>a</sup>Selectivity was calculated from side product(s) derived from the aryl halide. Identified side reactions include dehalogenation, dehalomethoxylation and homo-coupling. <sup>b</sup>Product peak unidentified from GC-FID. <sup>c</sup>KF used as a base.

**Table S6:** Product distributions for room temperature cross-coupling reactions.<sup>a</sup>

| 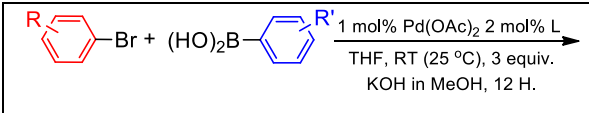 |                                                                                     |                                                                                     |          |  |  |  |  |
|-------------------------------------------------------------------------------------|-------------------------------------------------------------------------------------|-------------------------------------------------------------------------------------|----------|-------------------------------------------------------------------------------------|---------------------------------------------------------------------------------------|---------------------------------------------------------------------------------------|---------------------------------------------------------------------------------------|
| Entry                                                                               | ArBr                                                                                | ArB(OH) <sub>2</sub>                                                                | Ligand   | Desired product (%)                                                                 | Dehalogenation (%)                                                                    | Homo-coupling (%)                                                                     | Dehalomethoxylation (%)                                                               |
| 1                                                                                   |  |  | <b>1</b> | 100                                                                                 | 0                                                                                     | 0                                                                                     | 0                                                                                     |
|                                                                                     |                                                                                     |                                                                                     | <b>2</b> | 96                                                                                  | 4                                                                                     | 0                                                                                     | 0                                                                                     |
|                                                                                     |                                                                                     |                                                                                     | <b>3</b> | 97                                                                                  | 3                                                                                     | 0                                                                                     | 0                                                                                     |

|   |                                                                                     |                                                                                     |                        |     |    |    |    |
|---|-------------------------------------------------------------------------------------|-------------------------------------------------------------------------------------|------------------------|-----|----|----|----|
|   |                                                                                     |                                                                                     | <b>4</b>               | 49  | 2  | 0  | 0  |
|   |                                                                                     |                                                                                     | <b>PPh<sub>3</sub></b> | 45  | 12 | 7  | 0  |
|   |                                                                                     |                                                                                     |                        |     |    |    |    |
| 2 | 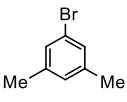   |    | <b>1</b>               | 100 | 0  | 0  | 0  |
|   |                                                                                     |                                                                                     | <b>2</b>               | 74  | 13 | 0  | 0  |
|   |                                                                                     |                                                                                     | <b>3</b>               | 97  | 3  | 0  | 0  |
|   |                                                                                     |                                                                                     | <b>4</b>               | 11  | 3  | 0  | 0  |
|   |                                                                                     |                                                                                     | <b>PPh<sub>3</sub></b> | 11  | 9  | 5  | 0  |
|   |                                                                                     |                                                                                     |                        |     |    |    |    |
| 3 |    |    | <b>1</b>               | 98  | 2  | 0  | 0  |
|   |                                                                                     |                                                                                     | <b>2</b>               | 9   | 6  | 0  | 7  |
|   |                                                                                     |                                                                                     | <b>3</b>               | 93  | 7  | 0  | 0  |
|   |                                                                                     |                                                                                     | <b>4</b>               | 32  | 5  | 0  | 0  |
|   |                                                                                     |                                                                                     | <b>PPh<sub>3</sub></b> | 9   | 20 | 3  | 0  |
|   |                                                                                     |                                                                                     |                        |     |    |    |    |
| 4 |  |  | <b>1</b>               | 76  | 24 | 0  | 0  |
|   |                                                                                     |                                                                                     | <b>2</b>               | 4   | 9  | 0  | 27 |
|   |                                                                                     |                                                                                     | <b>3</b>               | 53  | 29 | 0  | 0  |
|   |                                                                                     |                                                                                     | <b>4</b>               | 5   | 16 | 0  | 0  |
|   |                                                                                     |                                                                                     | <b>PPh<sub>3</sub></b> | 5   | 6  | 0  | 0  |
|   |                                                                                     |                                                                                     |                        |     |    |    |    |
| 5 |  |  | <b>1</b>               | 87  | 10 | 0  | 0  |
|   |                                                                                     |                                                                                     | <b>2</b>               | 91  | 9  | 0  | 0  |
|   |                                                                                     |                                                                                     | <b>3</b>               | 96  | 4  | 0  | 0  |
|   |                                                                                     |                                                                                     | <b>4</b>               | 54  | 4  | 0  | 0  |
|   |                                                                                     |                                                                                     | <b>PPh<sub>3</sub></b> | 25  | 18 | 11 | 0  |
|   |                                                                                     |                                                                                     |                        |     |    |    |    |
| 6 |                                                                                     |                                                                                     | <b>1</b>               | 98  | 2  | 0  | 0  |

|    |                                                                                     |                                                                                     |                        |     |    |   |    |
|----|-------------------------------------------------------------------------------------|-------------------------------------------------------------------------------------|------------------------|-----|----|---|----|
|    | 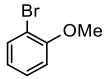   |    | <b>2</b>               | 13  | 14 | 0 | 0  |
|    |                                                                                     |                                                                                     | <b>3</b>               | 95  | 5  | 0 | 0  |
|    |                                                                                     |                                                                                     | <b>4</b>               | 22  | 10 | 0 | 0  |
|    |                                                                                     |                                                                                     | <b>PPh<sub>3</sub></b> | 12  | 28 | 5 | 0  |
|    |                                                                                     |                                                                                     |                        |     |    |   |    |
| 7  |    |    | <b>1</b>               | 97  | 3  | 0 | 0  |
|    |                                                                                     |                                                                                     | <b>2</b>               | 10  | 38 | 0 | 0  |
|    |                                                                                     |                                                                                     | <b>3</b>               | 94  | 6  | 0 | 0  |
|    |                                                                                     |                                                                                     | <b>4</b>               | 7   | 8  | 0 | 0  |
|    |                                                                                     |                                                                                     | <b>PPh<sub>3</sub></b> | 2   | 11 | 0 | 0  |
|    |                                                                                     |                                                                                     |                        |     |    |   |    |
| 8  |   |   | <b>1</b>               | 100 | 0  | 0 | 0  |
|    |                                                                                     |                                                                                     | <b>2</b>               | 75  | 7  | 0 | 18 |
|    |                                                                                     |                                                                                     | <b>3</b>               | 95  | 5  | 0 | 0  |
|    |                                                                                     |                                                                                     | <b>4</b>               | 72  | 18 | 0 | 0  |
|    |                                                                                     |                                                                                     | <b>PPh<sub>3</sub></b> | 32  | 57 | 0 | 0  |
|    |                                                                                     |                                                                                     |                        |     |    |   |    |
| 10 |  |  | <b>1</b>               | 93  | 7  | 0 | 0  |
|    |                                                                                     |                                                                                     | <b>2</b>               | 88  | 12 | 0 | 0  |
|    |                                                                                     |                                                                                     | <b>3</b>               | 91  | 9  | 0 | 0  |
|    |                                                                                     |                                                                                     | <b>4</b>               | 72  | 23 | 0 | 0  |
|    |                                                                                     |                                                                                     | <b>PPh<sub>3</sub></b> | 30  | 28 | 3 | 0  |
|    |                                                                                     |                                                                                     |                        |     |    |   |    |
| 11 |  |  | <b>1</b>               | 64  | 6  | 6 | 0  |
|    |                                                                                     |                                                                                     | <b>2</b>               | 8   | 11 | 0 | 0  |
|    |                                                                                     |                                                                                     | <b>3</b>               | 76  | 6  | 0 | 0  |
|    |                                                                                     |                                                                                     | <b>4</b>               | 24  | 9  | 7 | 0  |
|    |                                                                                     |                                                                                     | <b>PPh<sub>3</sub></b> | 38  | 9  | 5 | 0  |

|                 |  |  | 1                | 2   | 3 | 4 |     |
|-----------------|--|--|------------------|-----|---|---|-----|
| 12              |  |  | 1                | 86  | 3 | 0 | 0   |
|                 |  |  | 2                | 10  | 5 | 0 | 0   |
|                 |  |  | 3                | 0   | 7 | 0 | 0   |
|                 |  |  | 4                | 0   | 6 | 0 | 0   |
|                 |  |  | 5                | 9   | 5 | 0 | 0   |
|                 |  |  | 6                | 9   | 6 | 0 | 0   |
|                 |  |  | 7                | 0   | 5 | 0 | 0   |
|                 |  |  | 8                | 0   | 6 | 8 | 0   |
| 13              |  |  | 1                | 100 | 0 | 0 | 0   |
|                 |  |  | 2                | 76  | 3 | 0 | 5   |
|                 |  |  | 3                | 25  | 0 | 0 | 48  |
|                 |  |  | 4                | 34  | 0 | 0 | 66  |
|                 |  |  | 5                | 51  | 2 | 0 | 8   |
|                 |  |  | 6                | 27  | 1 | 0 | 2   |
|                 |  |  | 7                | 0   | 0 | 0 | 100 |
|                 |  |  | 8                | 0   | 0 | 0 | 100 |
|                 |  |  | PPh <sub>3</sub> | 20  | 0 | 0 | 4   |
| 14 <sup>b</sup> |  |  | 1                | 43  | 0 | 0 | 0   |
|                 |  |  | 2                | 88  | 0 | 0 | 0   |
|                 |  |  | 3                | 91  | 0 | 0 | 0   |
|                 |  |  | 4                | 94  | 0 | 0 | 0   |
|                 |  |  | 5                | 89  | 0 | 0 | 0   |
|                 |  |  | 6                | 87  | 0 | 0 | 0   |
|                 |  |  | 7                | 100 | 0 | 0 | 0   |

|                  |                                                                                     |                                                                                     |                        |     |   |   |   |
|------------------|-------------------------------------------------------------------------------------|-------------------------------------------------------------------------------------|------------------------|-----|---|---|---|
|                  |                                                                                     |                                                                                     | <b>8</b>               | 74  | 0 | 0 | 0 |
|                  |                                                                                     |                                                                                     |                        |     |   |   |   |
| 15 <sup>b</sup>  |    |    | <b>1</b>               | 43  | 0 | 0 | 0 |
|                  |                                                                                     |                                                                                     | <b>2</b>               | 15  | 0 | 0 | 0 |
|                  |                                                                                     |                                                                                     | <b>3</b>               | 88  | 0 | 0 | 0 |
|                  |                                                                                     |                                                                                     | <b>4</b>               | 85  | 0 | 0 | 0 |
|                  |                                                                                     |                                                                                     | <b>5</b>               | 22  | 0 | 0 | 0 |
|                  |                                                                                     |                                                                                     | <b>6</b>               | 18  | 0 | 0 | 0 |
|                  |                                                                                     |                                                                                     | <b>7</b>               | 90  | 0 | 0 | 0 |
|                  |                                                                                     |                                                                                     | <b>8</b>               | 35  | 0 | 0 | 0 |
|                  |                                                                                     |                                                                                     | <b>PPh<sub>3</sub></b> | 11  | 0 | 0 | 0 |
|                  |                                                                                     |                                                                                     |                        |     |   |   |   |
| 16 <sup>cd</sup> |  |  | <b>1</b>               | 59  | 0 | 0 | 0 |
|                  |                                                                                     |                                                                                     | <b>2</b>               | 100 | 0 | 0 | 0 |
|                  |                                                                                     |                                                                                     | <b>3</b>               | 91  | 0 | 0 | 0 |
|                  |                                                                                     |                                                                                     | <b>4</b>               | 85  | 0 | 0 | 0 |
|                  |                                                                                     |                                                                                     | <b>5</b>               | 96  | 0 | 0 | 0 |
|                  |                                                                                     |                                                                                     | <b>6</b>               | 88  | 0 | 0 | 0 |
|                  |                                                                                     |                                                                                     | <b>7</b>               | 90  | 0 | 0 | 0 |
|                  |                                                                                     |                                                                                     | <b>8</b>               | 65  | 0 | 0 | 0 |
|                  |                                                                                     |                                                                                     |                        |     |   |   |   |
| 17               |  |  | <b>2</b>               | 78  | 0 | 0 | 0 |
|                  |                                                                                     |                                                                                     | <b>4</b>               | 100 | 0 | 0 | 0 |
|                  |                                                                                     |                                                                                     | <b>5</b>               | 93  | 0 | 0 | 0 |
|                  |                                                                                     |                                                                                     | <b>7</b>               | 75  | 0 | 0 | 0 |
|                  |                                                                                     |                                                                                     |                        |     |   |   |   |
| 18               |  |  | <b>1</b>               | 100 | 0 | 0 | 0 |
|                  |                                                                                     |                                                                                     | <b>3</b>               | 84  | 0 | 0 | 0 |

|    |                                                                                     |                                                                                     |          |     |    |   |   |
|----|-------------------------------------------------------------------------------------|-------------------------------------------------------------------------------------|----------|-----|----|---|---|
|    |                                                                                     |                                                                                     | <b>5</b> | 78  | 0  | 6 | 0 |
|    |                                                                                     |                                                                                     | <b>7</b> | 37  | 0  | 0 | 0 |
|    |                                                                                     |                                                                                     |          |     |    |   |   |
| 19 |    |    | <b>2</b> | 95  | 0  | 0 | 0 |
|    |                                                                                     |                                                                                     | <b>3</b> | 12  | 0  | 0 | 0 |
|    |                                                                                     |                                                                                     | <b>5</b> | 30  | 0  | 0 | 0 |
|    |                                                                                     |                                                                                     | <b>7</b> | 67  | 0  | 0 | 0 |
|    |                                                                                     |                                                                                     |          |     |    |   |   |
| 20 |    |    | <b>2</b> | 20  | 0  | 0 | 0 |
|    |                                                                                     |                                                                                     | <b>4</b> | 0   | 28 | 0 | 0 |
|    |                                                                                     |                                                                                     | <b>5</b> | 0   | 27 | 0 | 0 |
|    |                                                                                     |                                                                                     | <b>7</b> | 0   | 12 | 2 | 0 |
|    |                                                                                     |                                                                                     |          |     |    |   |   |
| 21 |  |  | <b>1</b> | 100 | 0  | 0 | 0 |
|    |                                                                                     |                                                                                     | <b>3</b> | 0   | 0  | 0 | 0 |
|    |                                                                                     |                                                                                     | <b>5</b> | 0   | 0  | 0 | 0 |
|    |                                                                                     |                                                                                     | <b>7</b> | 0   | 0  | 0 | 0 |
|    |                                                                                     |                                                                                     |          |     |    |   |   |
| 22 |  |  | <b>2</b> | 53  | 0  | 0 | 0 |
|    |                                                                                     |                                                                                     | <b>3</b> | 0   | 0  | 0 | 0 |
|    |                                                                                     |                                                                                     | <b>5</b> | 3   | 0  | 6 | 0 |
|    |                                                                                     |                                                                                     | <b>7</b> | 6   | 0  | 4 | 0 |
|    |                                                                                     |                                                                                     |          |     |    |   |   |

<sup>a</sup>GC yields (%) of identified side products derived from the aryl halide. The mechanism of dehalogenation, homo-coupling, and dehalomethoxylation can be retrieved from the provided references.<sup>3-8</sup> <sup>b</sup>KF used as the base. <sup>c</sup>Yields were lower/moderate with KOH as the base, ligand **1** (42%) and **3** (63%). Reactions with aryl chlorides were selective towards the desired product, i.e no side reaction(s). Also see attached GC chromatograms.

#### NMR spectra: Suzuki products

4-Methyl-biphenyl

<sup>1</sup>H-NMR (CDCl<sub>3</sub>)



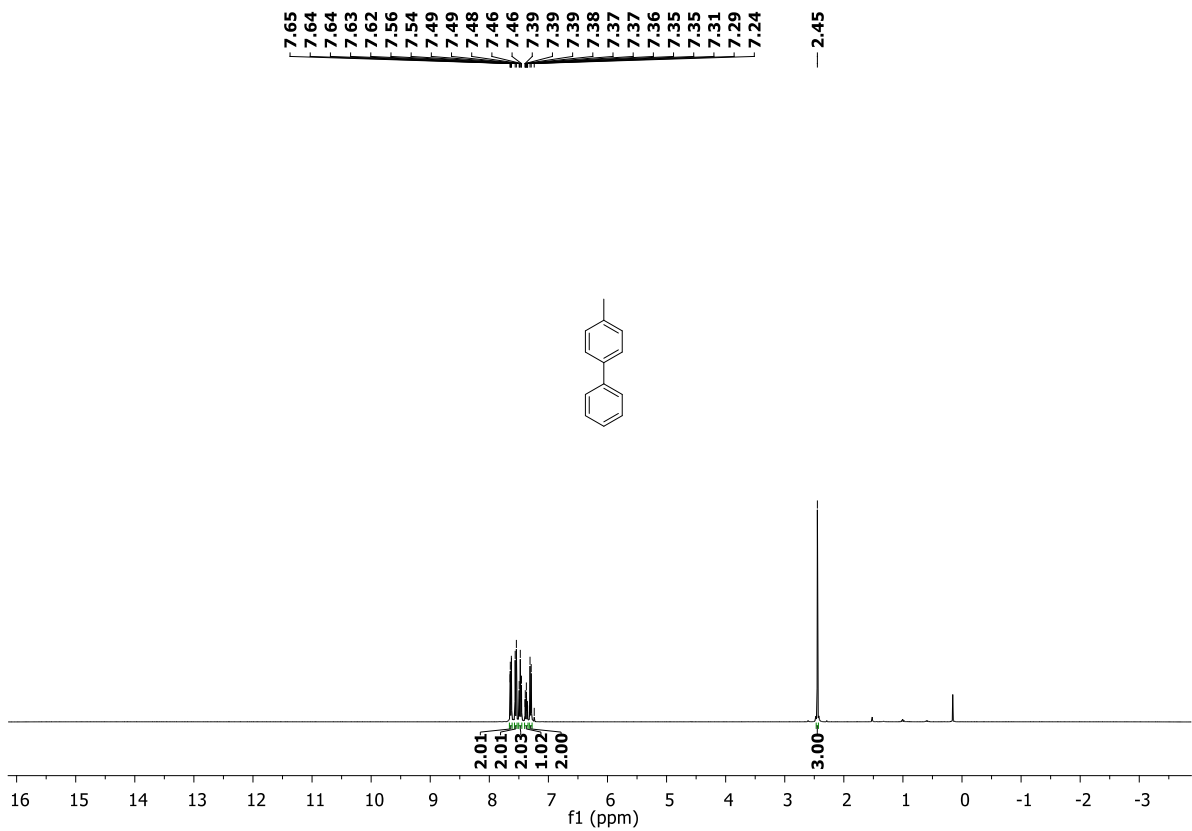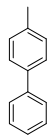

<sup>13</sup>C-NMR (CDCl<sub>3</sub>)

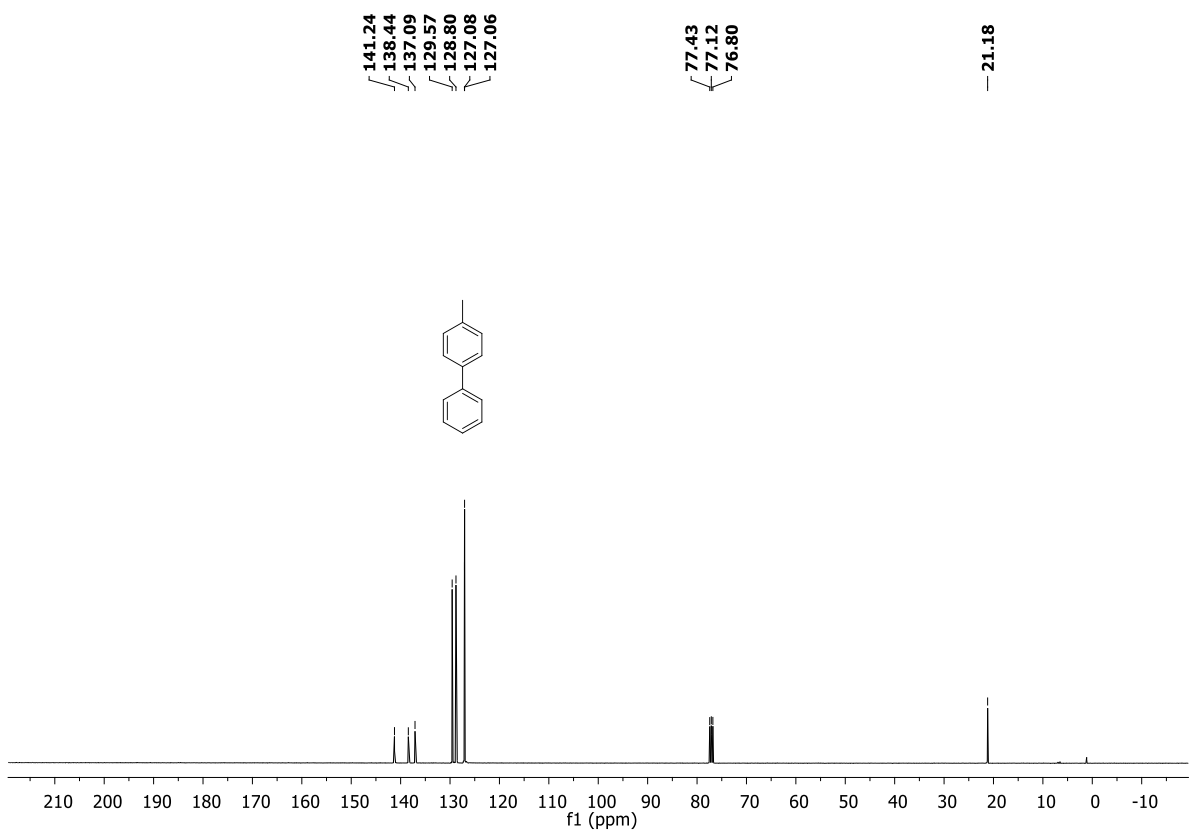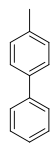

### 3-Methyl-biphenyl

<sup>1</sup>H-NMR (CDCl<sub>3</sub>)

7.61  
7.60  
7.60  
7.59  
7.59  
7.58  
7.58  
7.46  
7.46  
7.45  
7.44  
7.43  
7.42  
7.42  
7.40  
7.36  
7.36  
7.36  
7.35  
7.34  
7.34  
7.33  
7.33  
7.32  
7.32  
7.24  
7.18  
7.16  
— 2.43

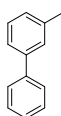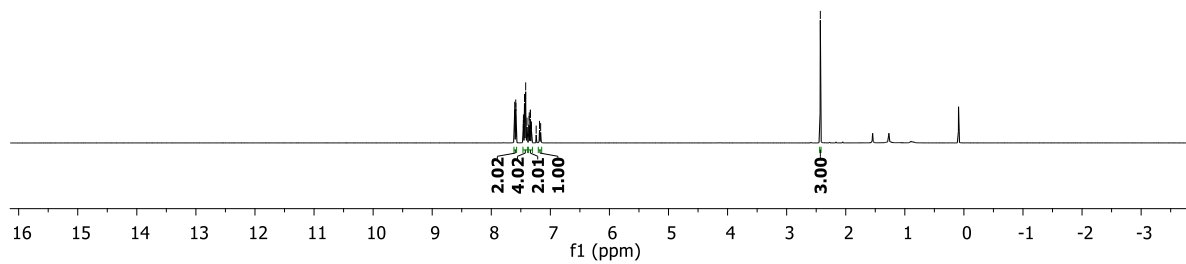

<sup>13</sup>C-NMR (CDCl<sub>3</sub>)

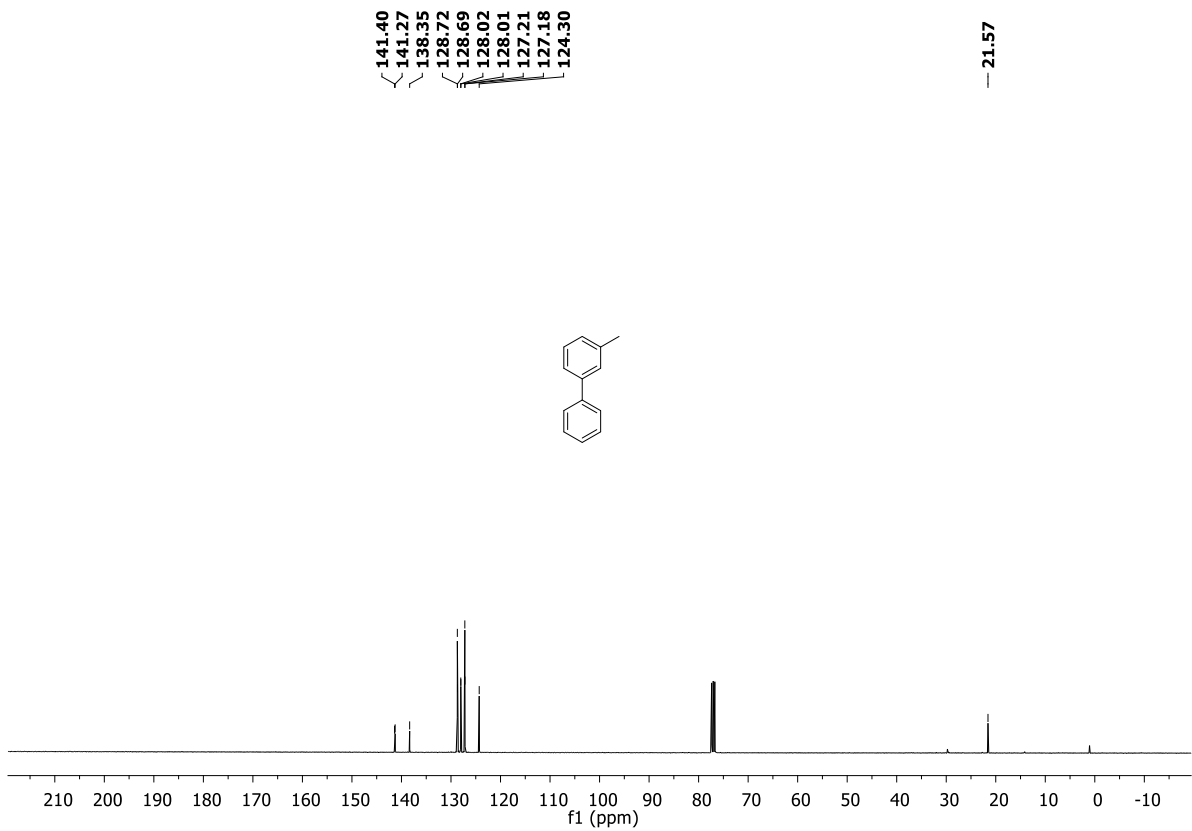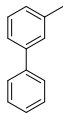

3,5-Dimethyl-1,1'-biphenyl

<sup>1</sup>H-NMR (CDCl<sub>3</sub>)

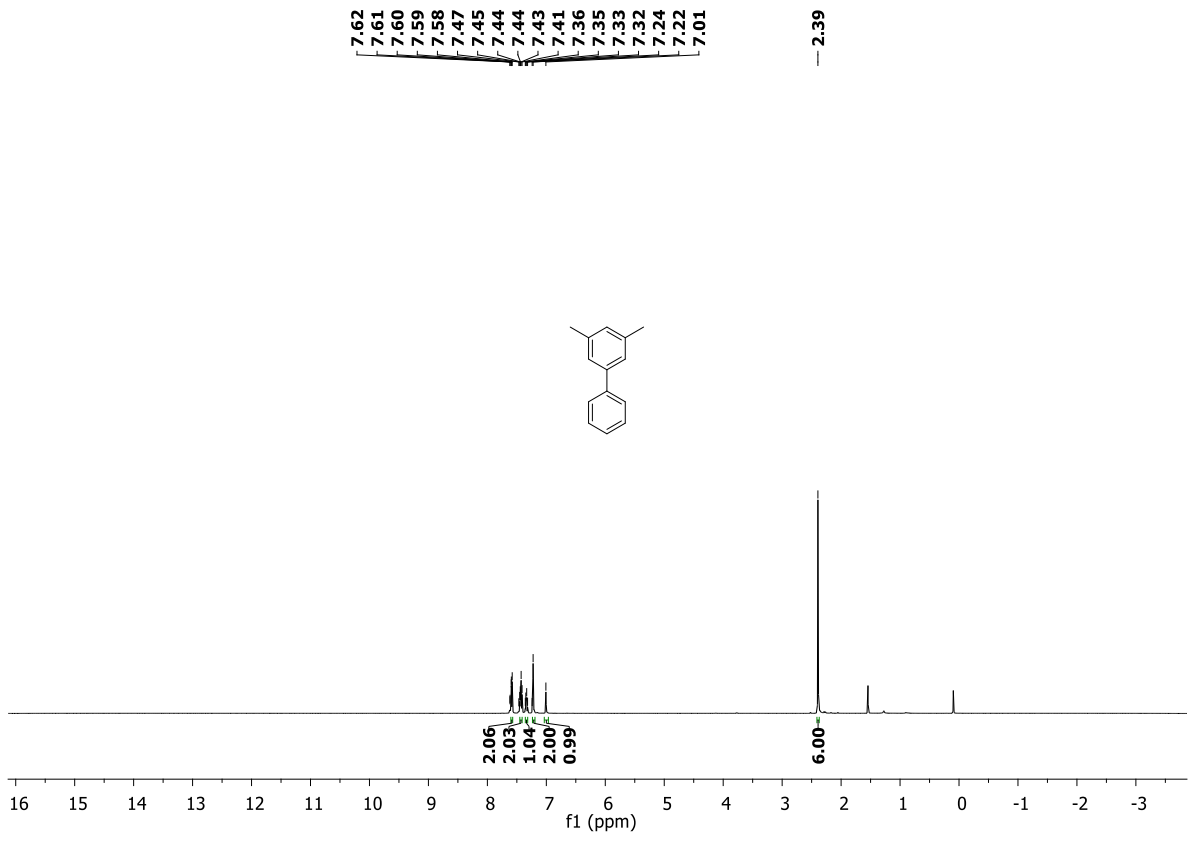

141.51  
141.30  
138.27  
128.92  
128.78  
128.66  
127.28  
127.22  
127.20  
127.10  
125.14

21.44

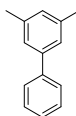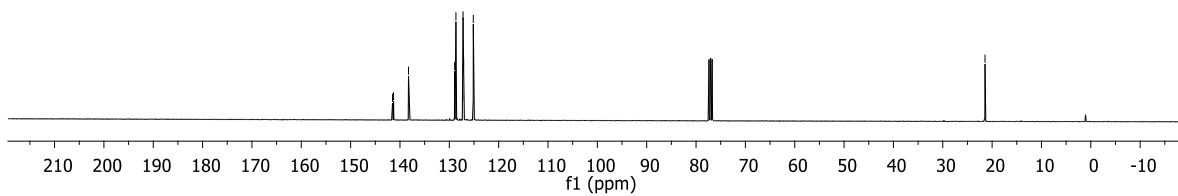

2,4-Dimethyl-1,1'-biphenyl

$^1\text{H-NMR}$  ( $\text{CDCl}_3$ )

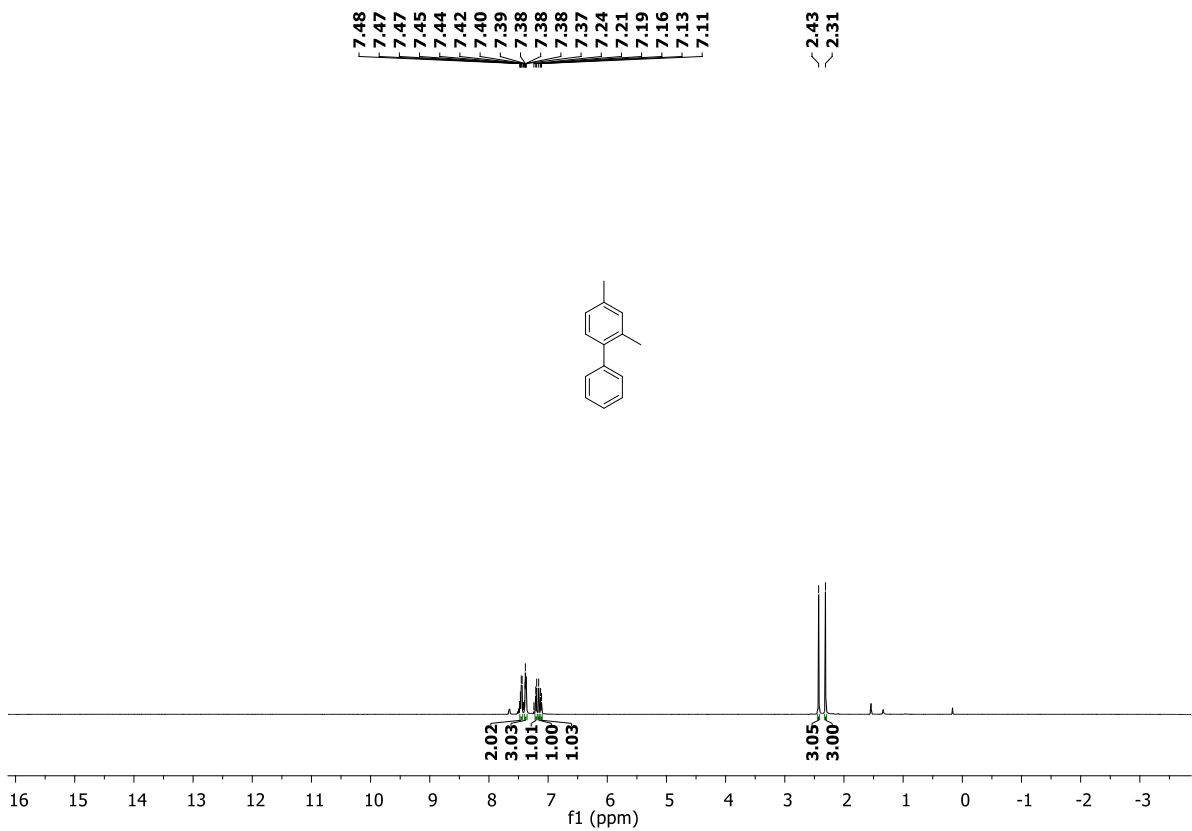

<sup>13</sup>C-NMR (CDCl<sub>3</sub>)

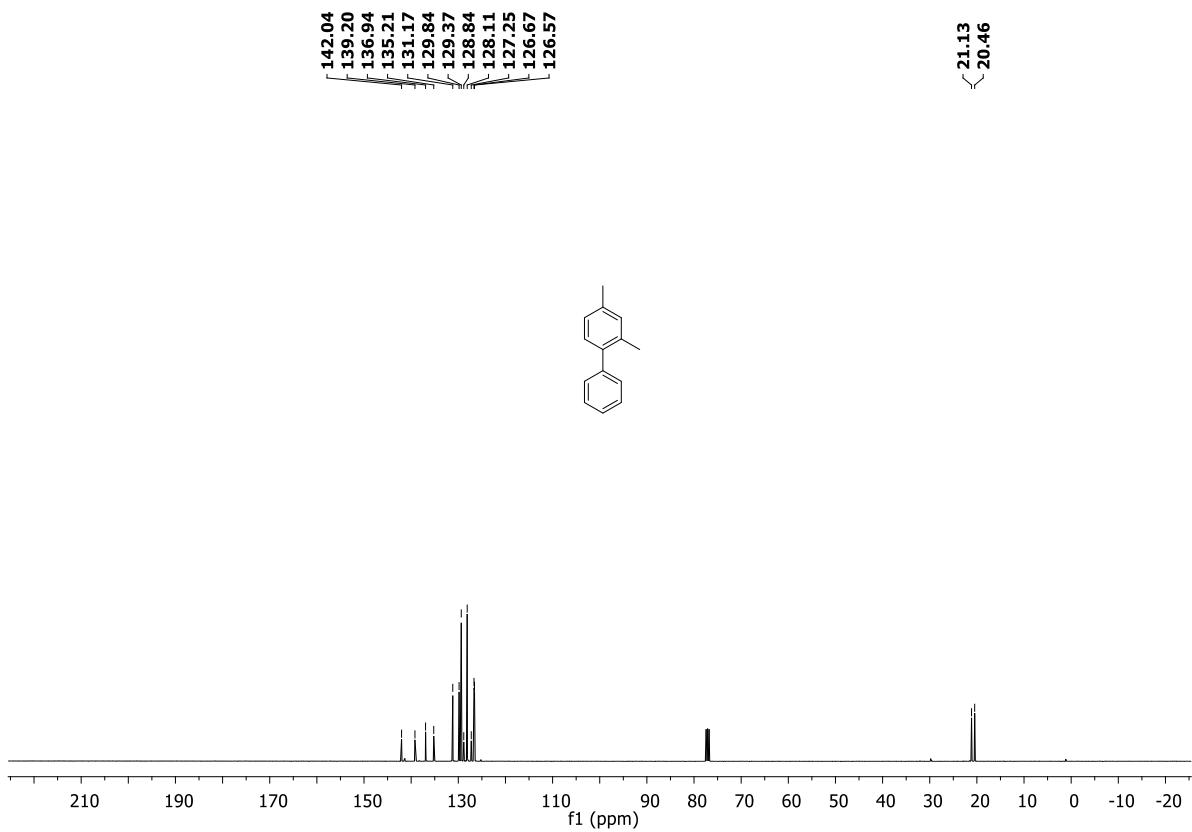

# 2-Methoxy-biphenyl

$^1\text{H-NMR}$  ( $\text{CDCl}_3$ )

7.56  
7.56  
7.56  
7.54  
7.45  
7.45  
7.44  
7.43  
7.41  
7.41  
7.36  
7.35  
7.35  
7.34  
7.34  
7.33  
7.32  
7.32  
7.24  
7.07  
7.07  
7.05  
7.05  
7.03  
7.03  
7.01  
6.99  
3.82

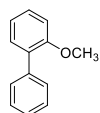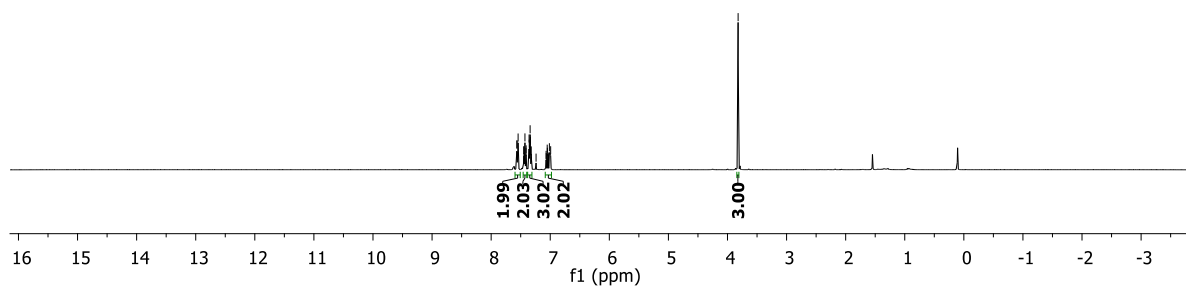

$^{13}\text{C-NMR}$  ( $\text{CDCl}_3$ )

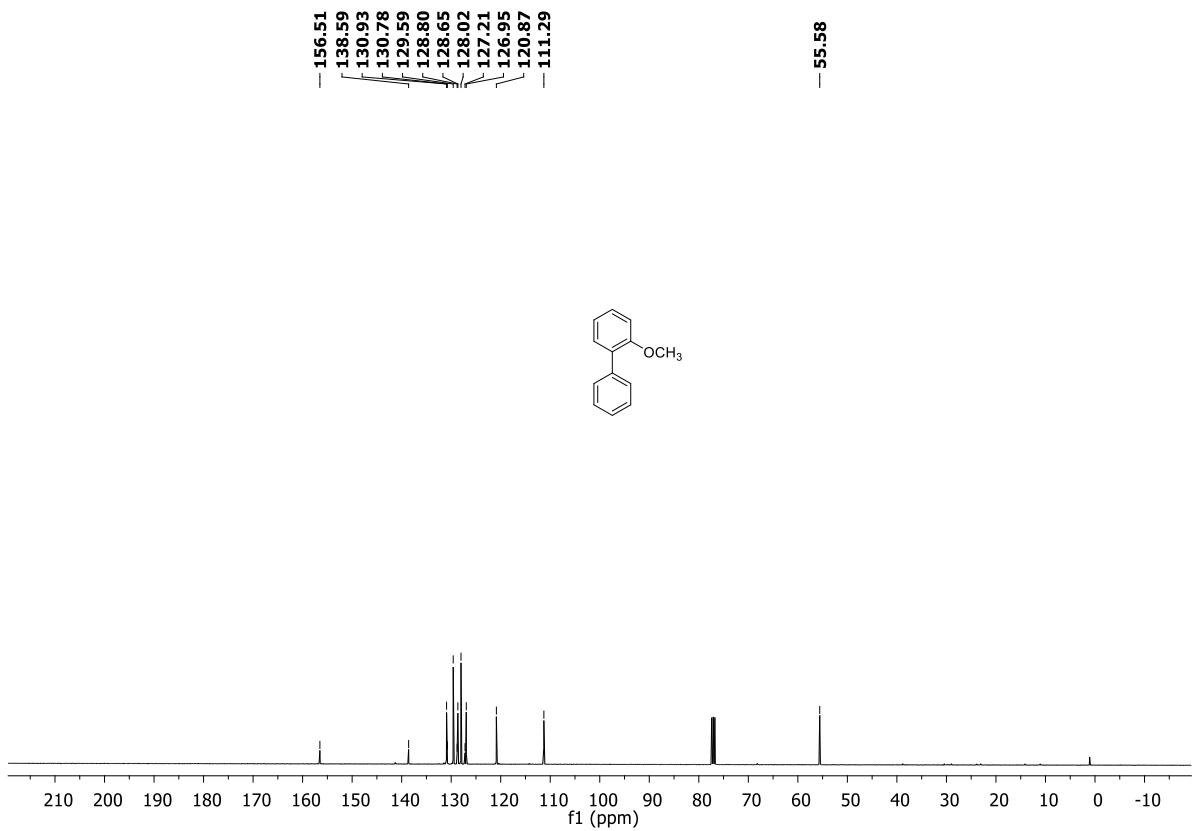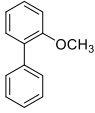

4-Methoxy-biphenyl

$^1\text{H-NMR}$  ( $\text{CDCl}_3$ )



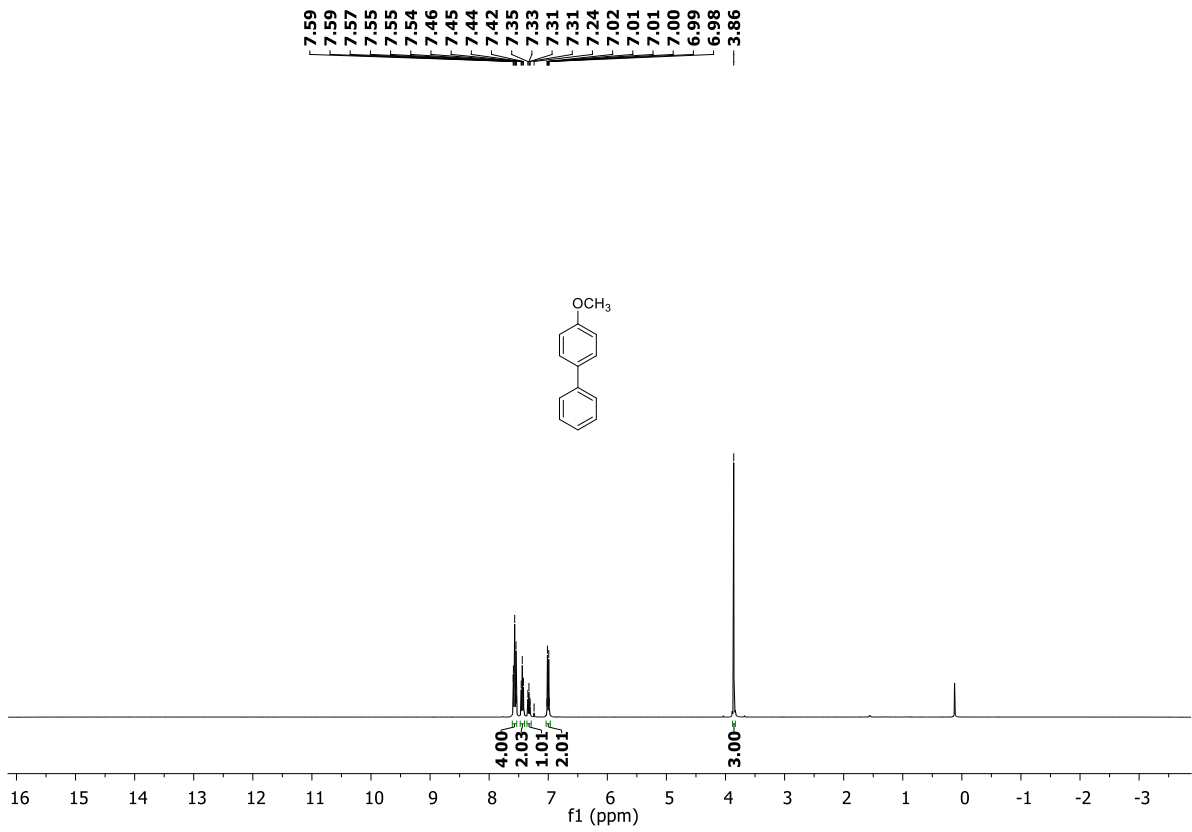

<sup>13</sup>C-NMR (CDCl<sub>3</sub>)

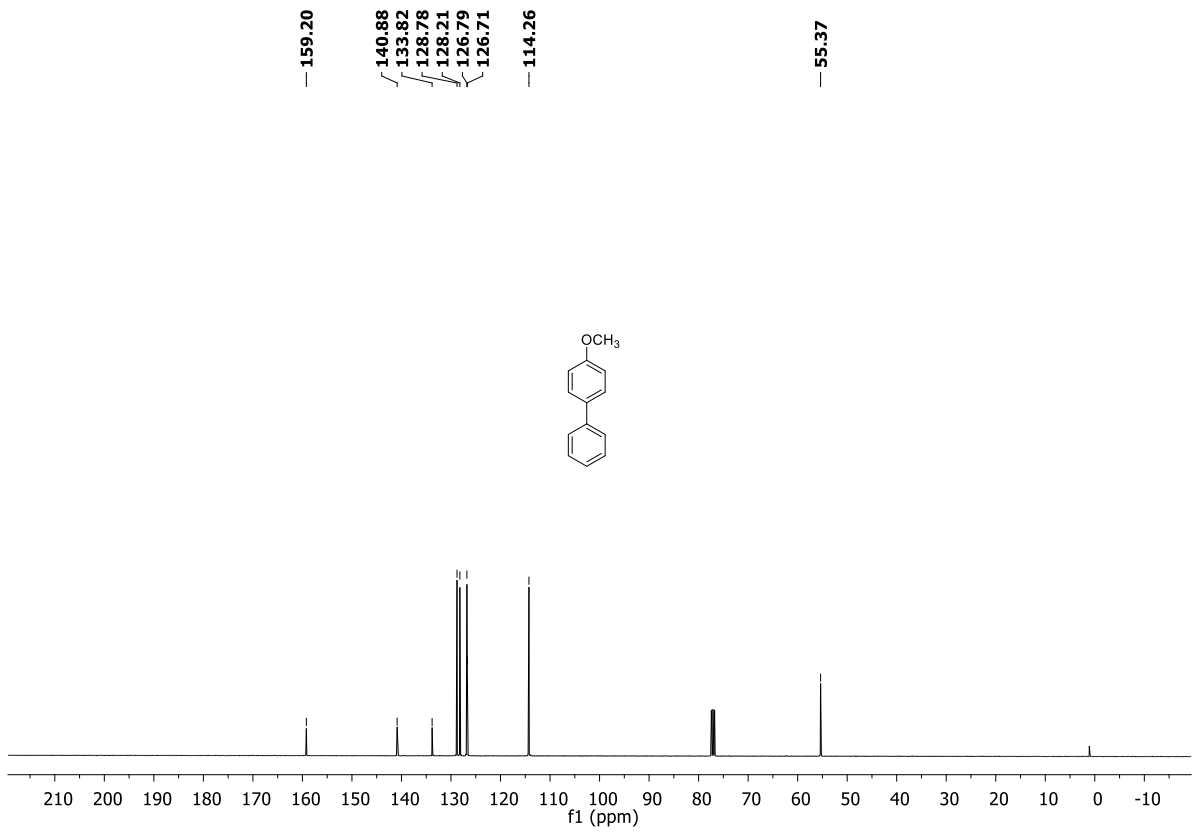

2,6-Dimethoxy-1,1'-biphenyl

$^1\text{H-NMR}$  ( $\text{CDCl}_3$ )

7.45  
7.44  
7.42  
7.39  
7.39  
7.37  
7.36  
7.36  
7.34  
7.32  
7.30  
7.29  
7.24  
6.69  
6.68  
— 3.75

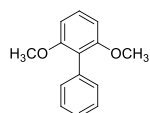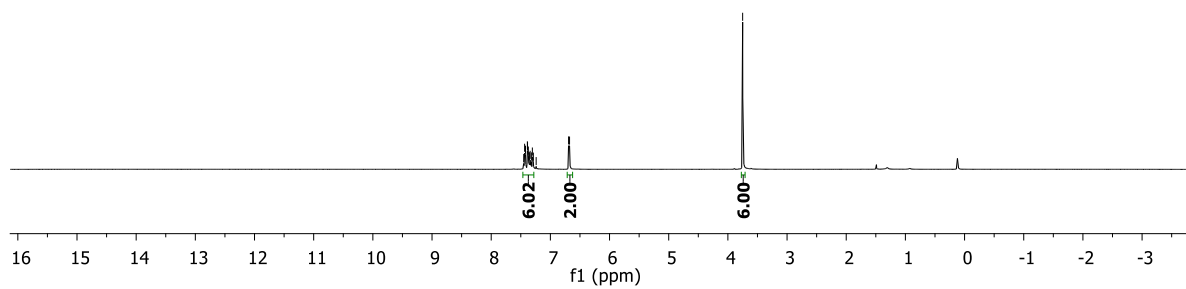

$^{13}\text{C-NMR}$  ( $\text{CDCl}_3$ )

—157.74  
134.21  
130.95  
128.69  
127.71  
126.81  
119.65  
—104.29  
—55.96

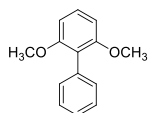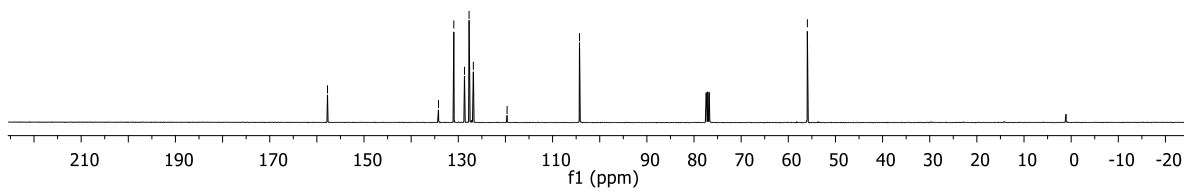

2-Phenylnaphthalene

<sup>1</sup>H-NMR (CDCl<sub>3</sub>)

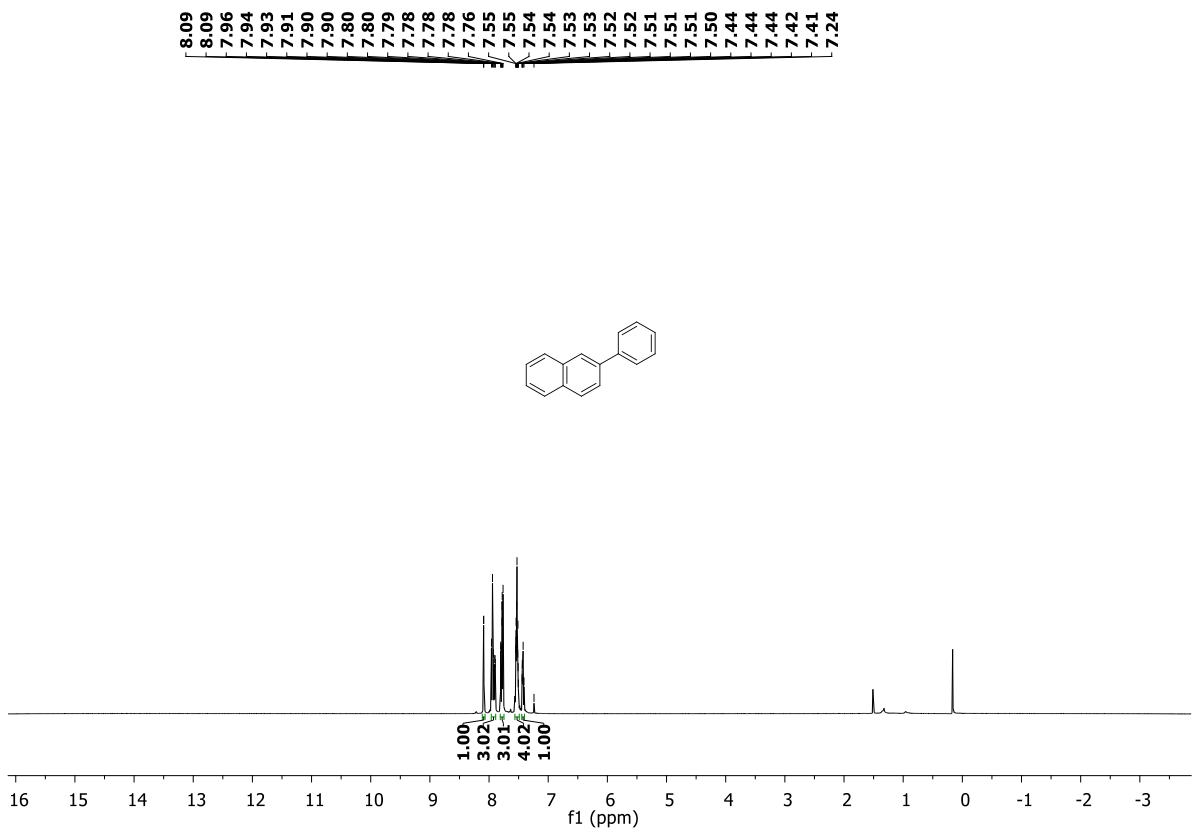

$^{13}\text{C-NMR}$  (CDCl<sub>3</sub>)

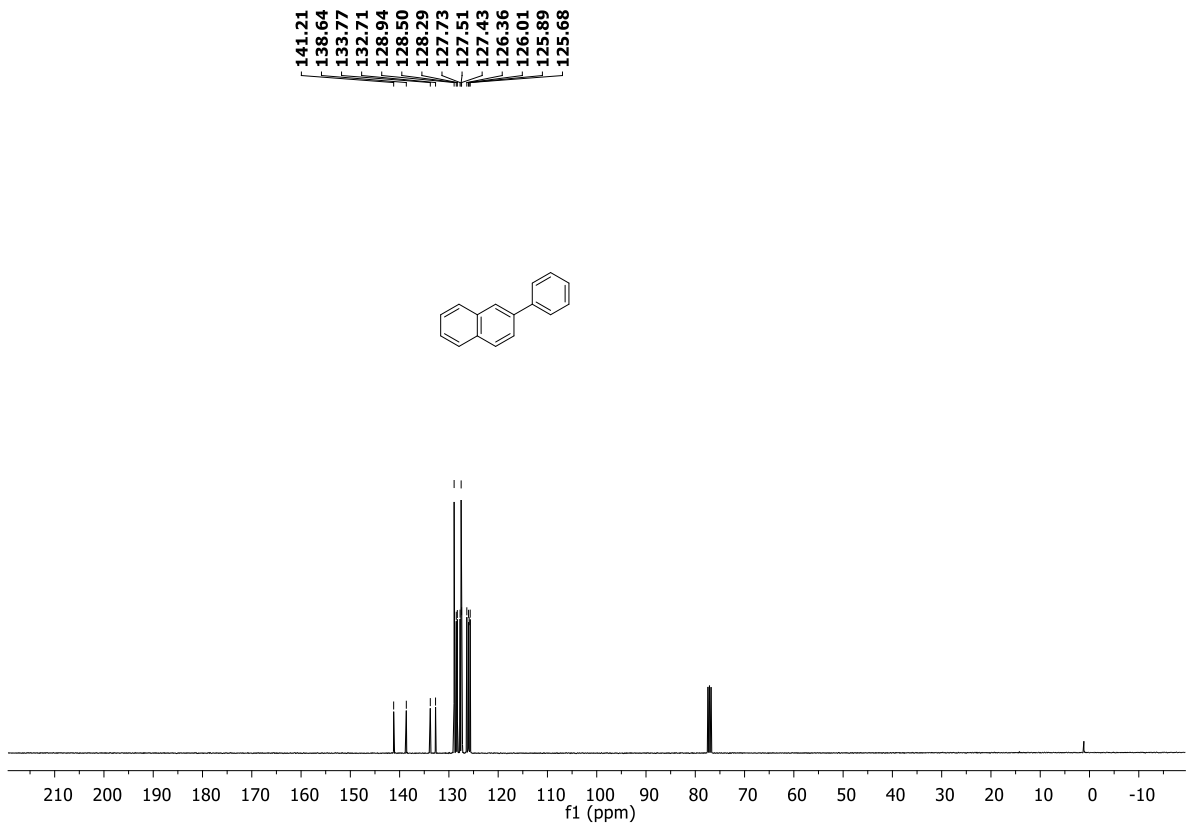

# 2-Methoxy-6-phenylnaphthalene

$^1\text{H-NMR}$  ( $\text{CDCl}_3$ )

7.98  
7.82  
7.81  
7.80  
7.79  
7.73  
7.73  
7.72  
7.72  
7.71  
7.70  
7.49  
7.48  
7.46  
7.38  
7.37  
7.35  
7.24  
7.20  
7.19  
7.18  
7.17  
7.17  
7.16  
3.94

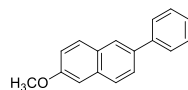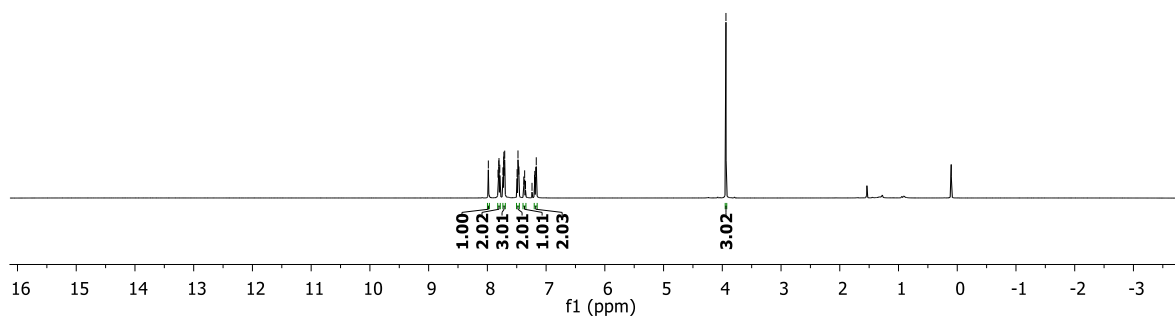

$^{13}\text{C-NMR}$  ( $\text{CDCl}_3$ )

157.81  
136.42  
133.82  
129.75  
129.22  
128.86  
127.29  
127.26  
127.10  
126.07  
125.65  
119.19  
55.36

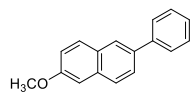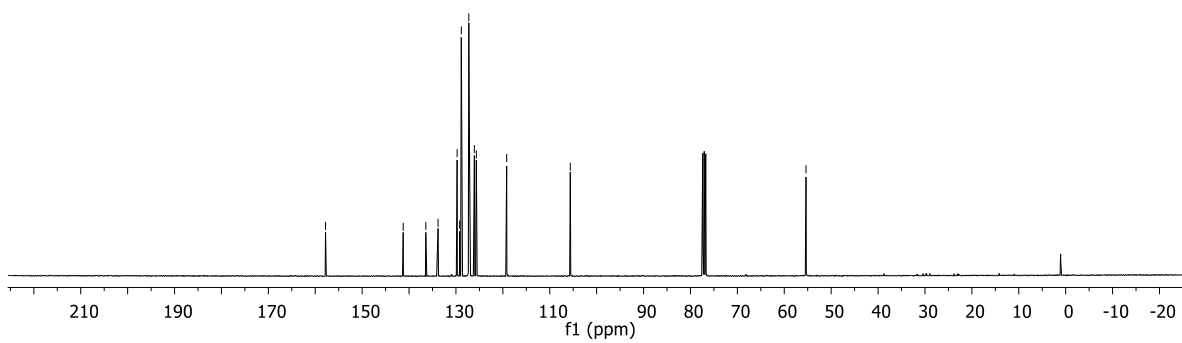

2,4'-Dimethyl-1,1'-biphenyl

<sup>1</sup>H-NMR (CDCl<sub>3</sub>)

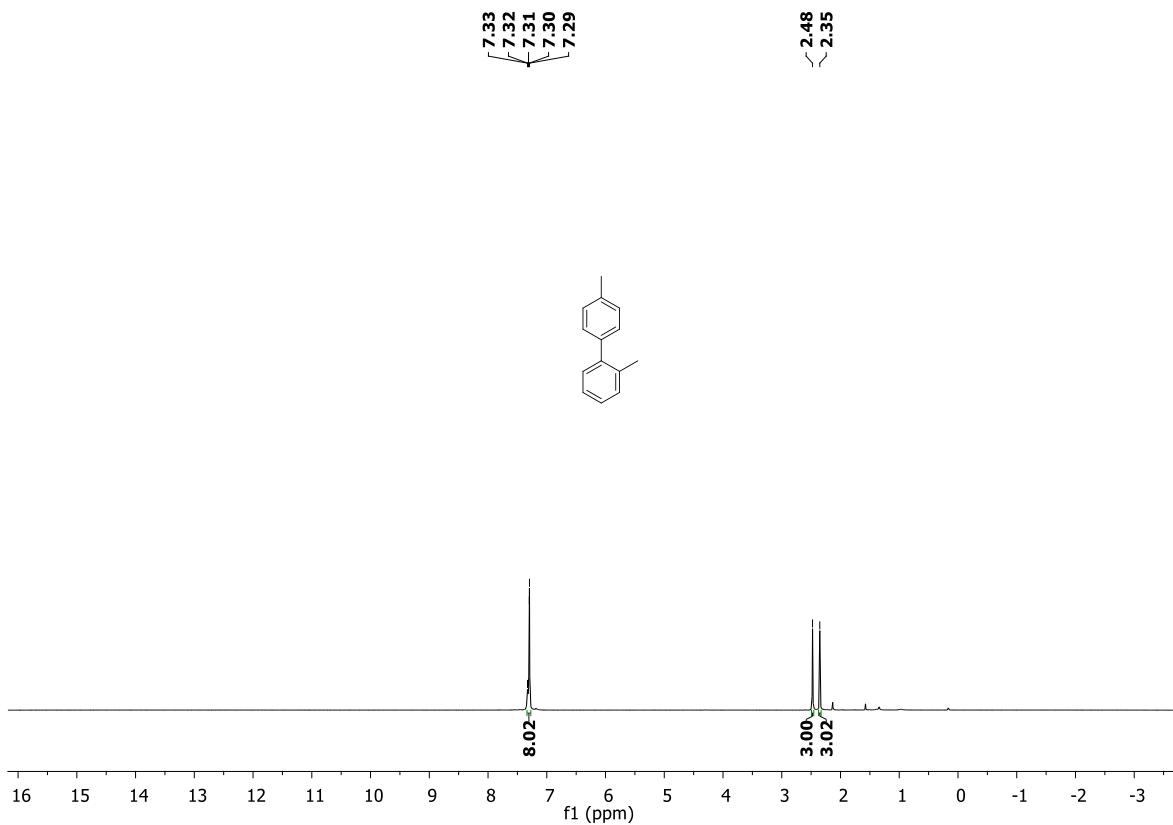

$^{13}\text{C-NMR}$  (CDCl<sub>3</sub>)

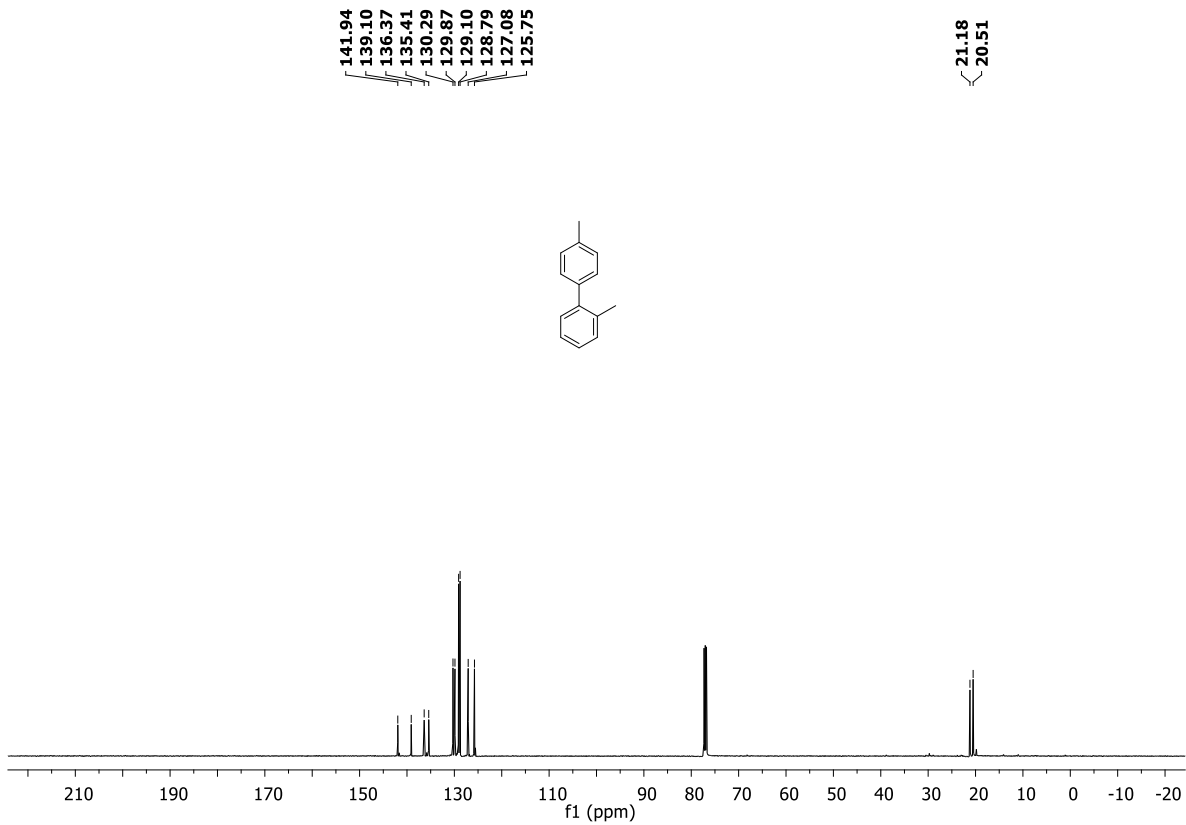

2,4,6-Trimethyl-1,1'-biphenyl.

$^1\text{H-NMR}$  ( $\text{CDCl}_3$ )

7.24  
7.22  
7.17  
7.15  
7.14  
7.11  
7.09  
7.04  
7.03

2.41  
2.04

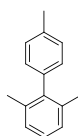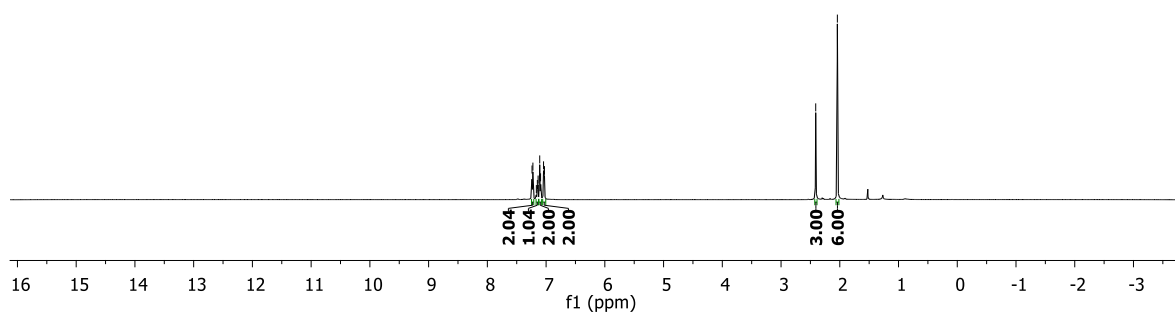

$^{13}\text{C-NMR}$  ( $\text{CDCl}_3$ )



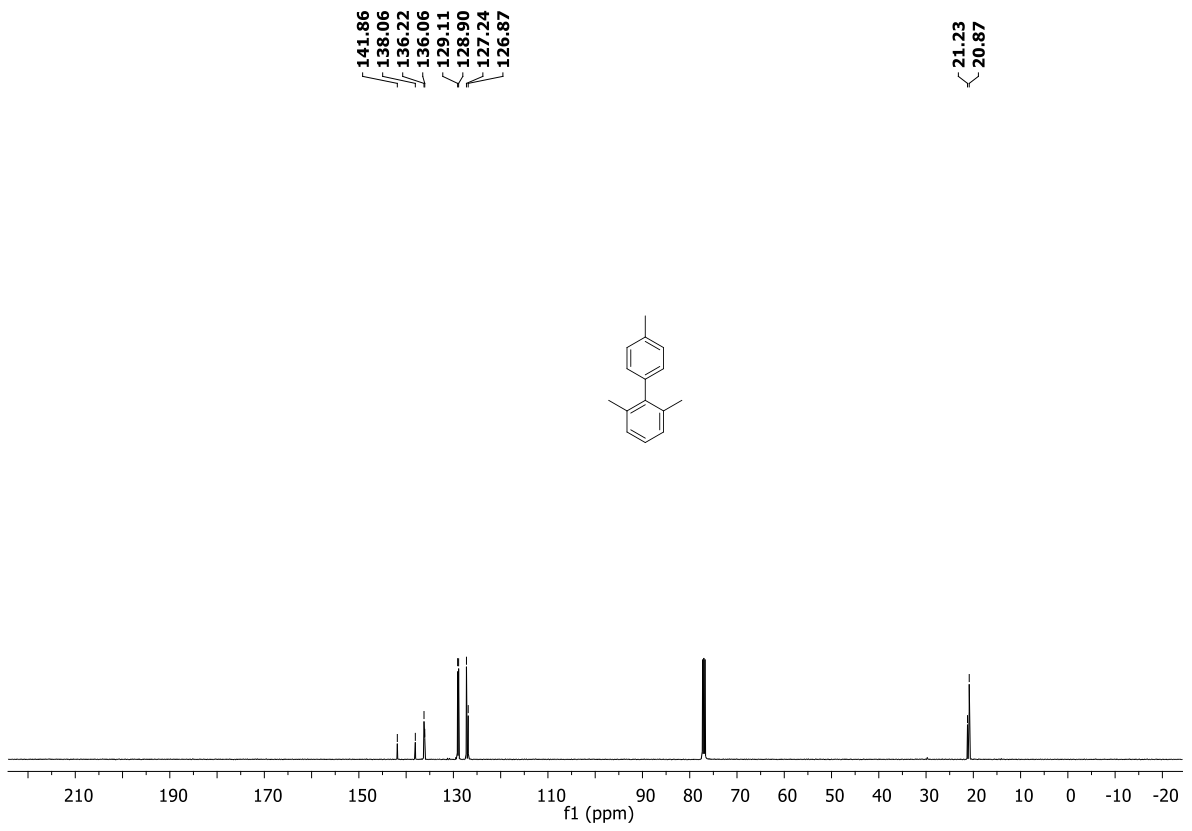

2,4,6-trimethyl-1,1'-biphenyl

$^{13}\text{C}$ -NMR ( $\text{CDCl}_3$ )

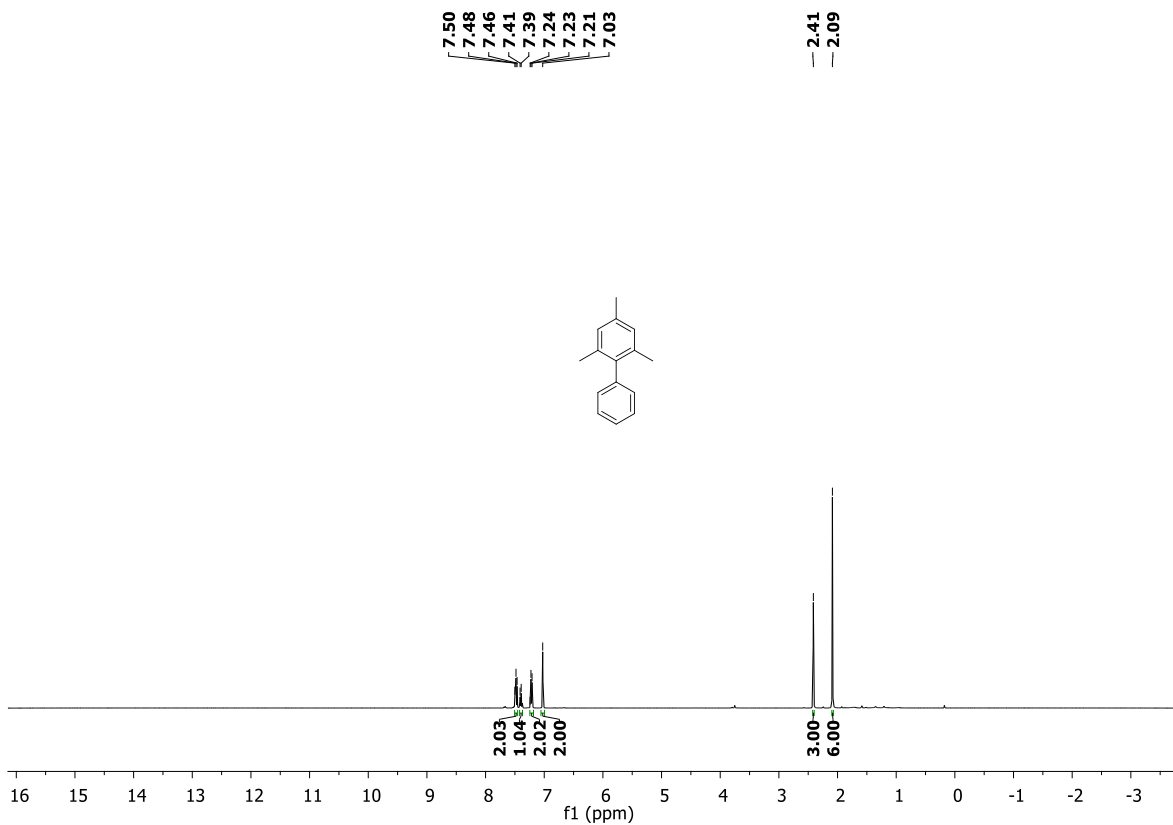

<sup>13</sup>C-NMR (CDCl<sub>3</sub>)

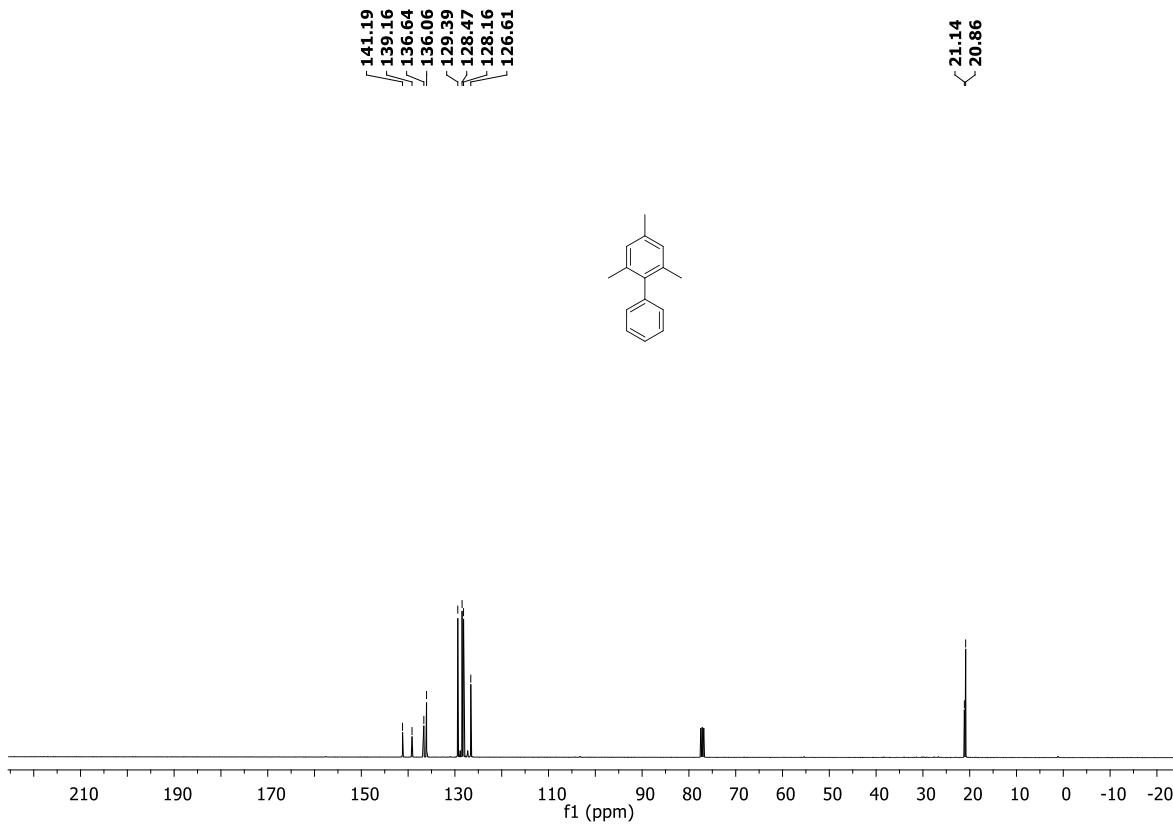

# 3-Phenyl-pyridine

$^1\text{H-NMR}$  ( $\text{CDCl}_3$ )

8.82  
8.56  
8.55  
7.82  
7.80  
7.54  
7.52  
7.44  
7.43  
7.41  
7.37  
7.36  
7.34  
7.31  
7.30  
7.29  
7.28

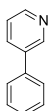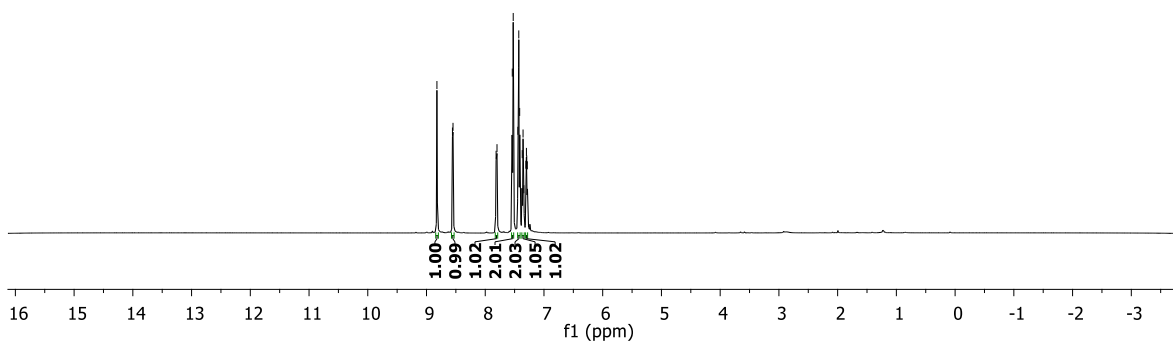

$^{13}\text{C-NMR}$  ( $\text{CDCl}_3$ )

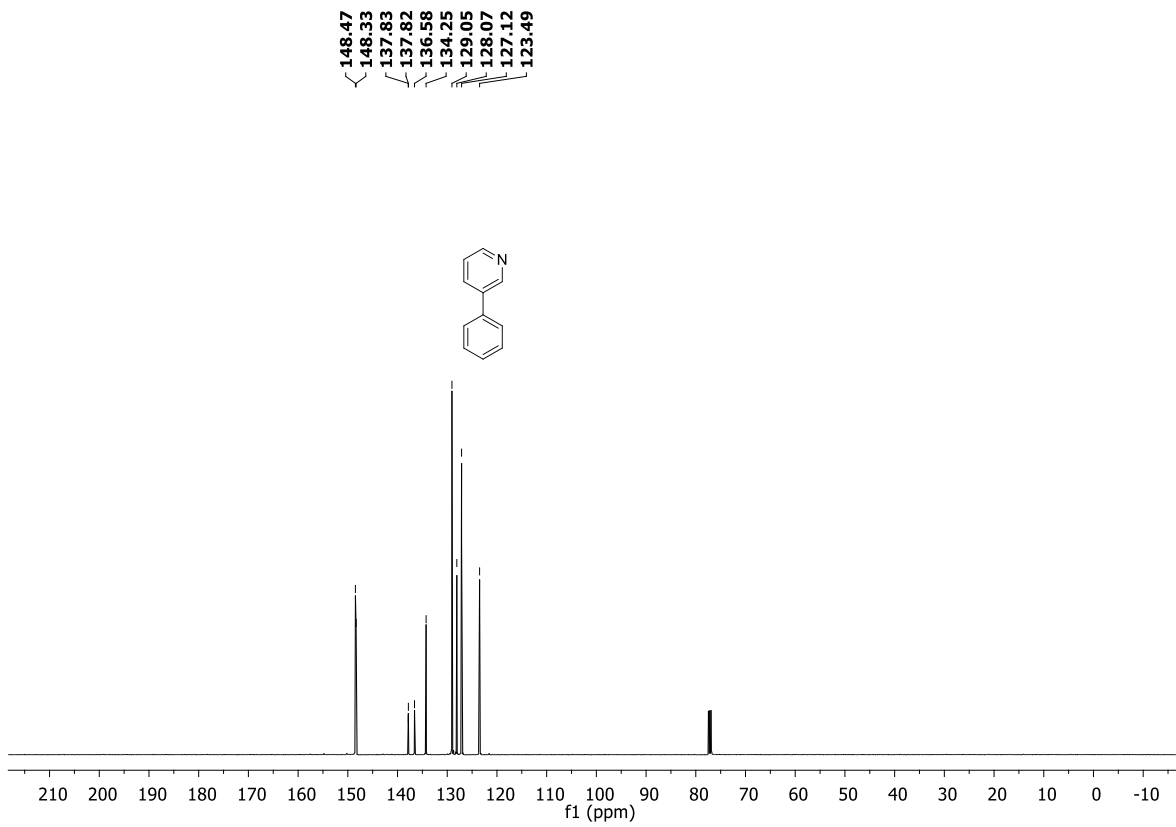

2-Phenyl-pyridine

$^1\text{H-NMR}$  ( $\text{CDCl}_3$ )

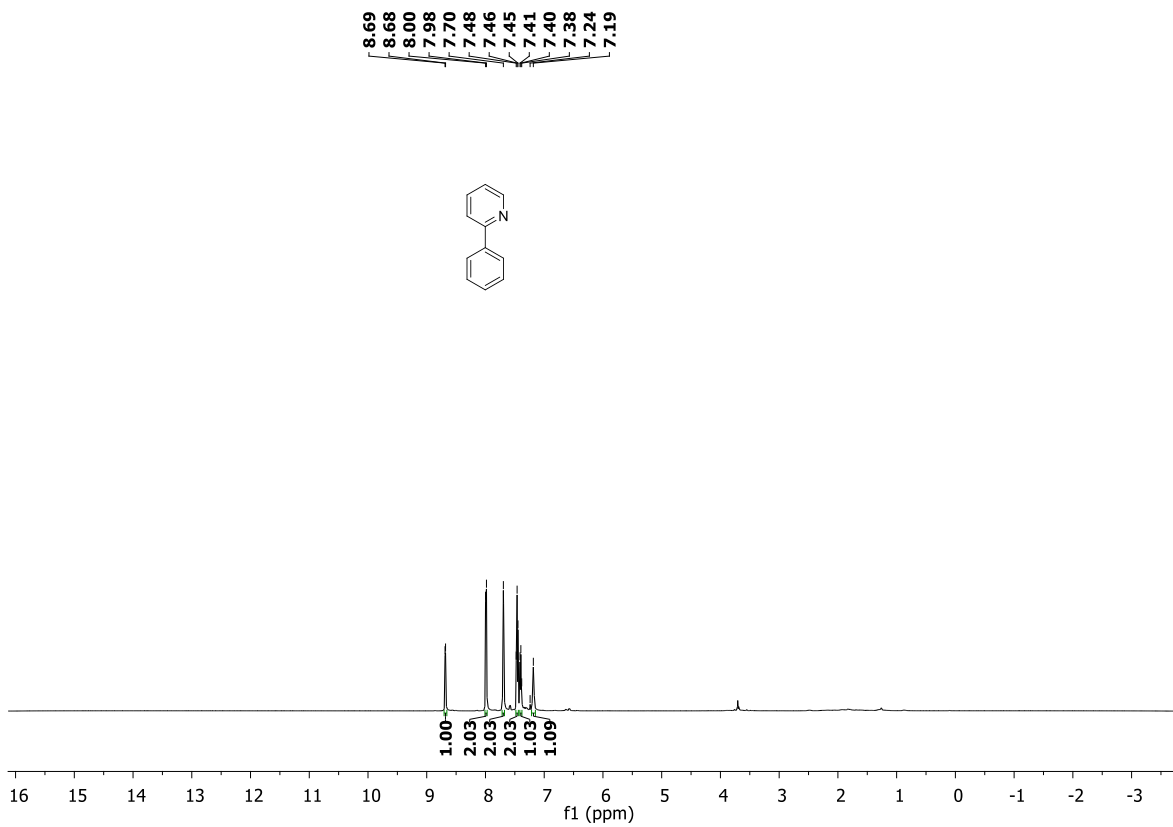

<sup>13</sup>C-NMR (CDCl<sub>3</sub>)

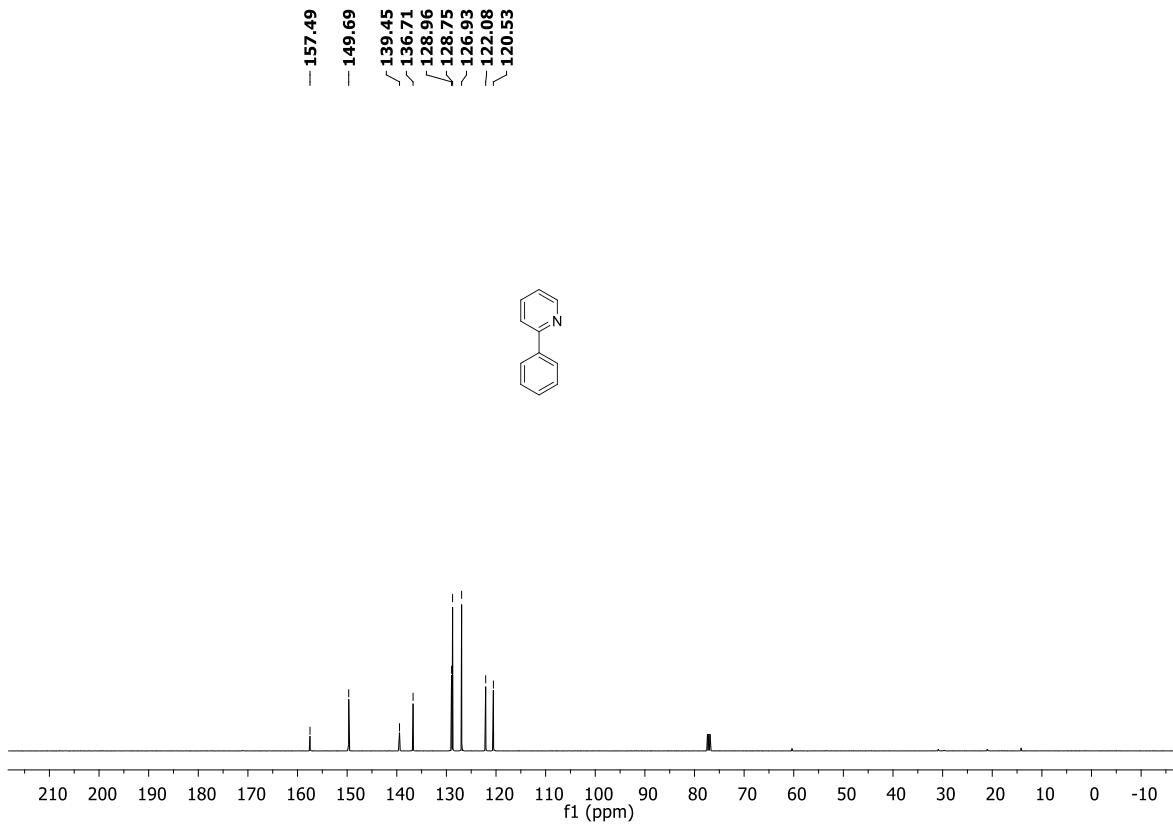

# 2-Phenyl-quinoline

$^1\text{H-NMR}$  ( $\text{CDCl}_3$ )

8.22  
8.21  
8.19  
8.18  
8.15  
7.85  
7.83  
7.80  
7.79  
7.74  
7.73  
7.73  
7.71  
7.55  
7.54  
7.52  
7.51  
7.50  
7.49  
7.49  
7.47  
7.46

8.21  
8.19  
8.18  
8.15  
7.85  
7.83  
7.80  
7.79  
7.73  
7.73  
7.55  
7.54  
7.52  
7.51  
7.49  
7.49  
7.47

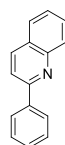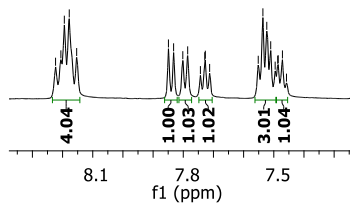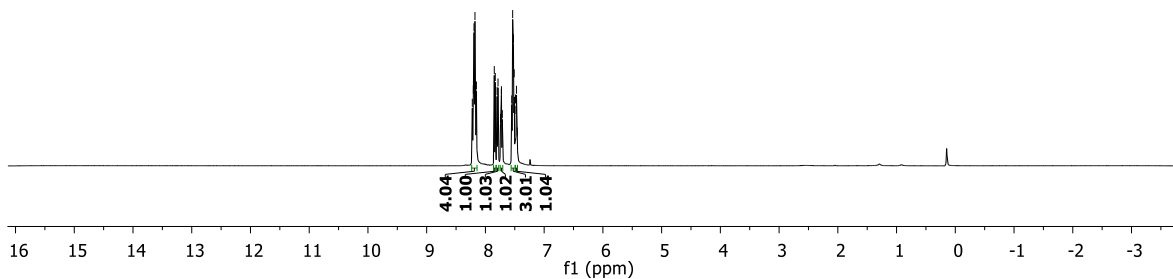

$^{13}\text{C-NMR}$  ( $\text{CDCl}_3$ )

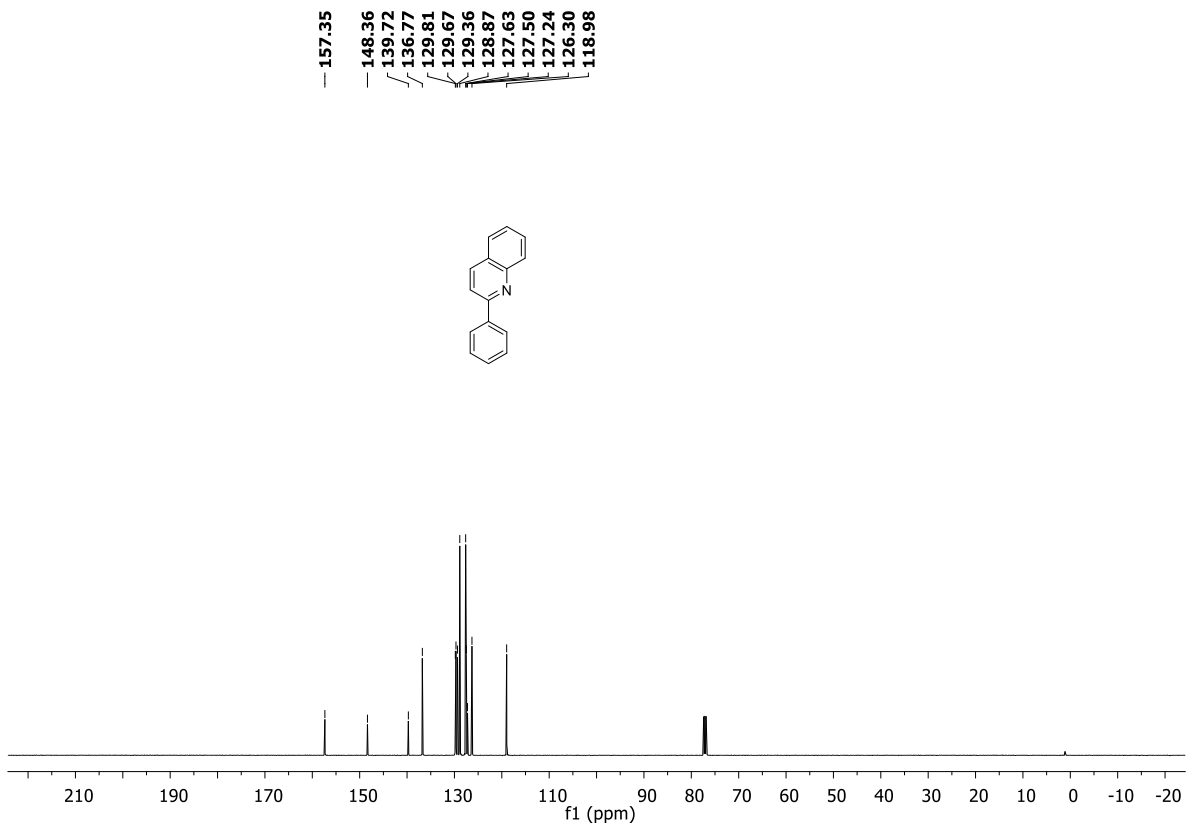

2-Phenyl-thiophene

$^{13}\text{C}$ -NMR ( $\text{CDCl}_3$ )

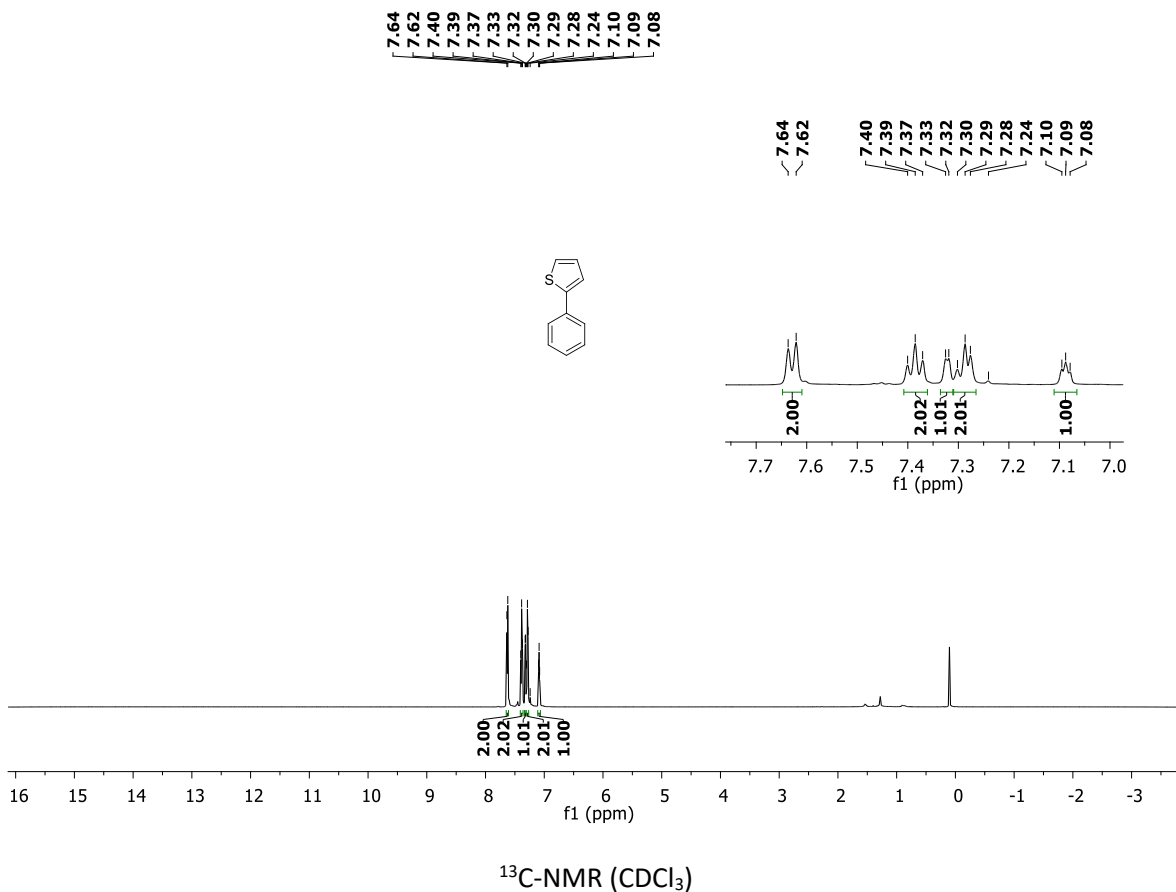



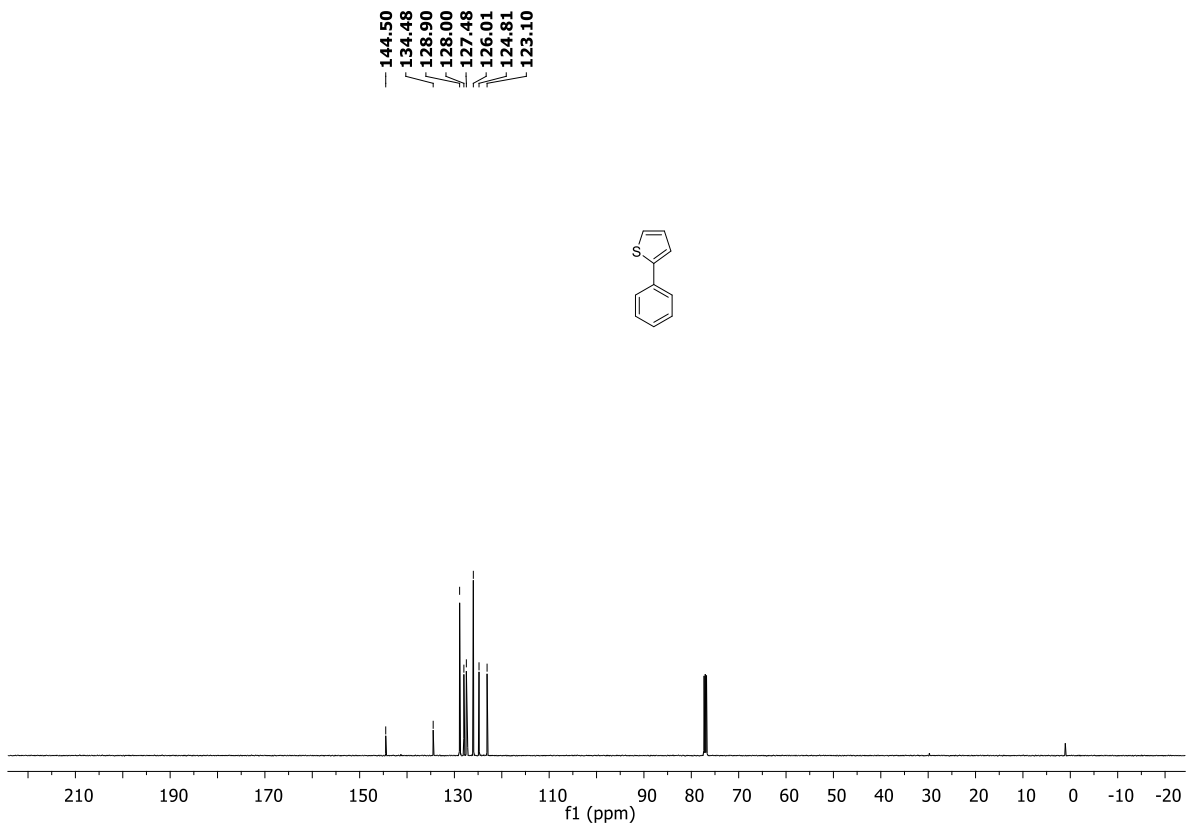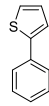

2-(*o*-Tolyl)pyridine

<sup>1</sup>H-NMR (CDCl<sub>3</sub>)

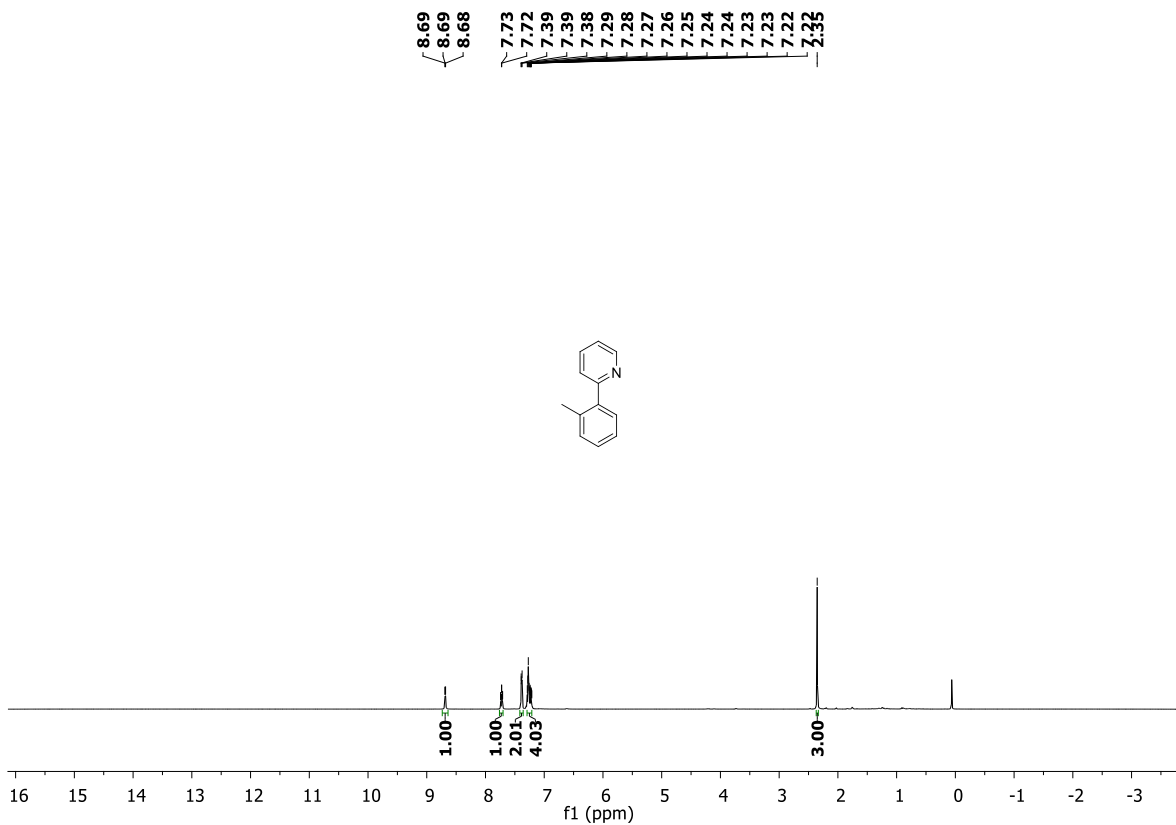

<sup>13</sup>C-NMR (CDCl<sub>3</sub>)

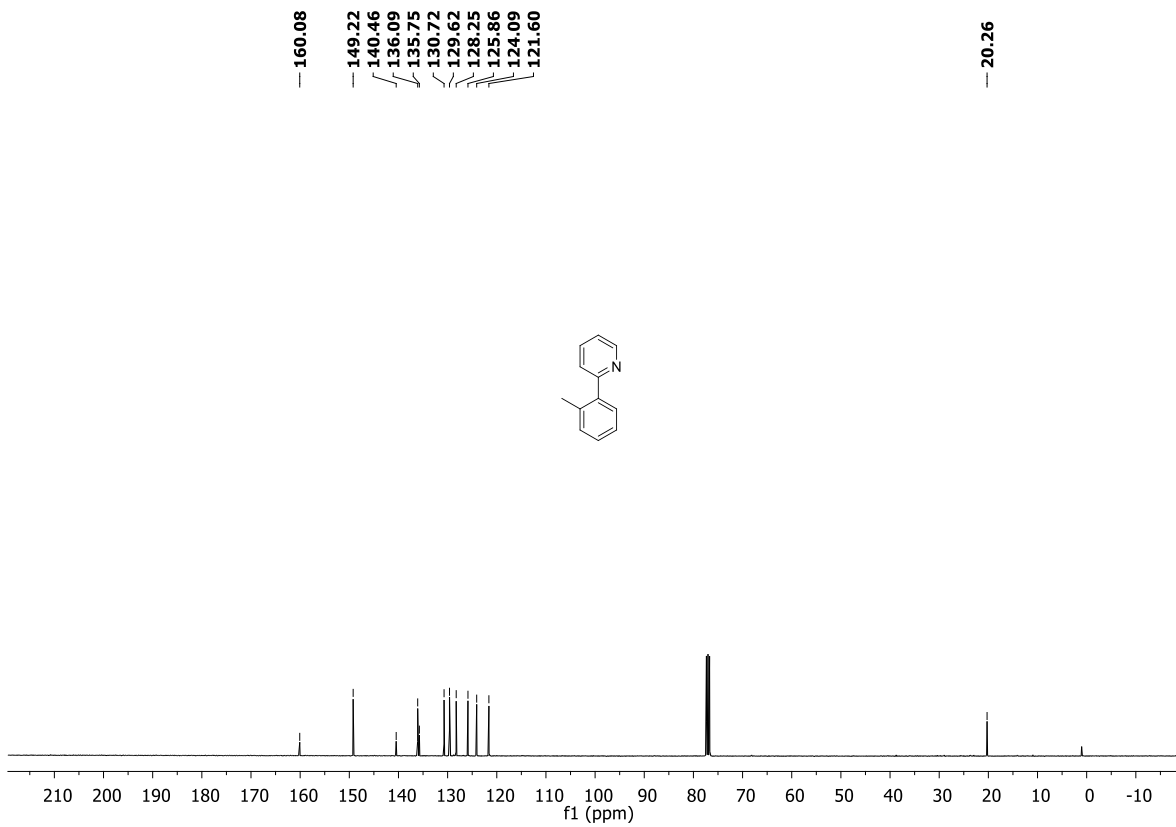

3-(*o*-Tolyl)pyridine

$^1\text{H-NMR}$  ( $\text{CDCl}_3$ )

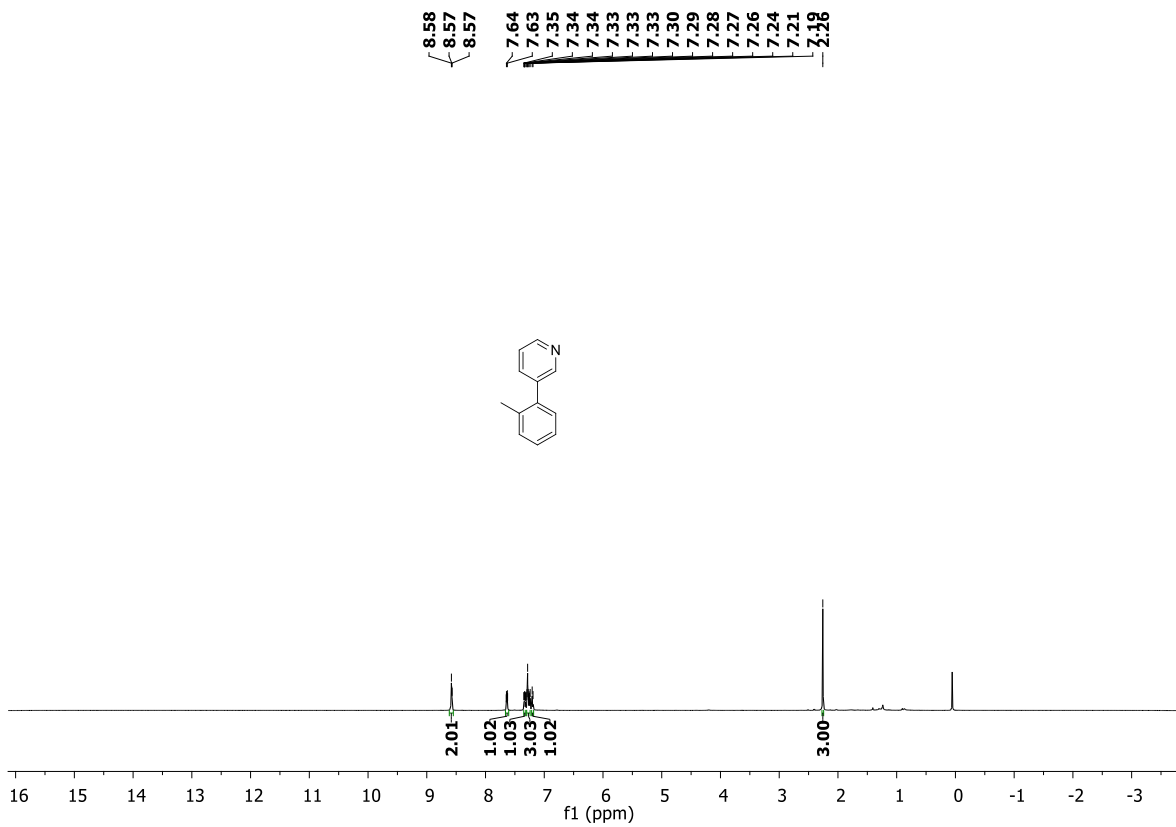

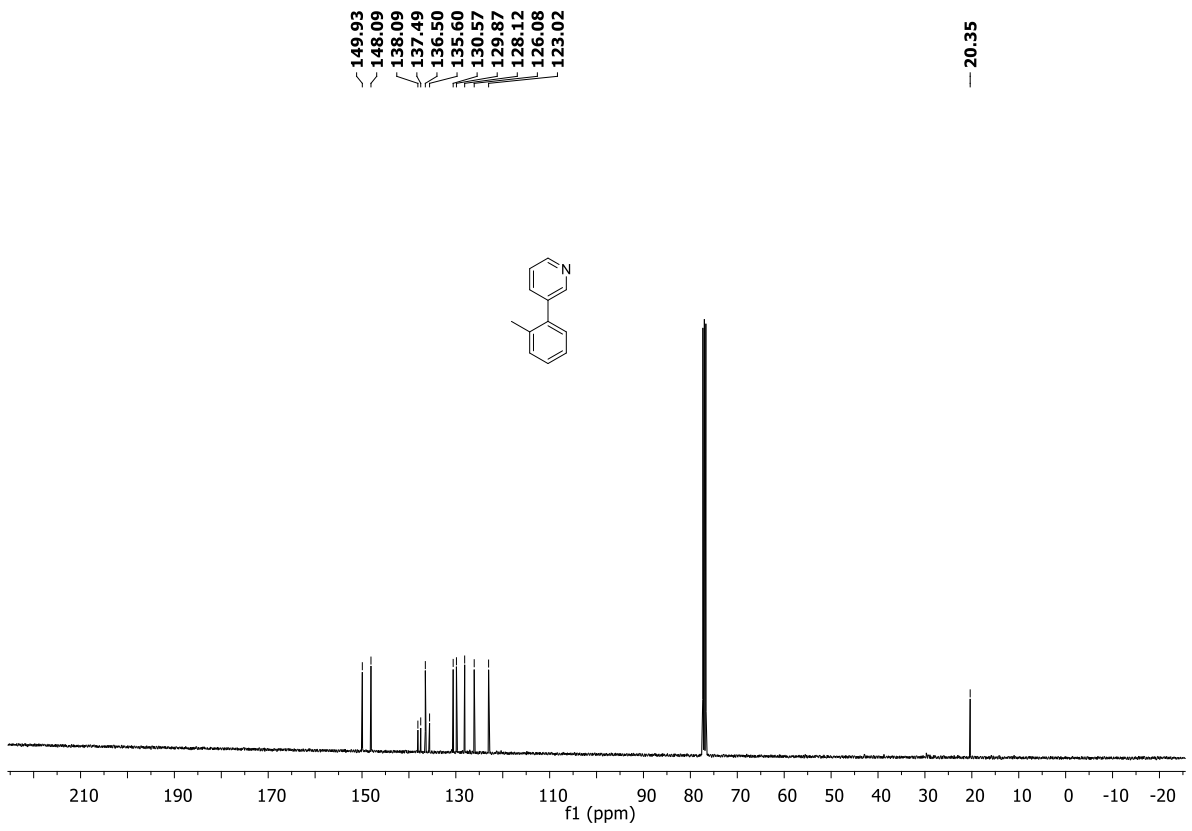

2-(*o*-Tolyl)-thiophene

$^{13}\text{C}$ -NMR ( $\text{CDCl}_3$ )

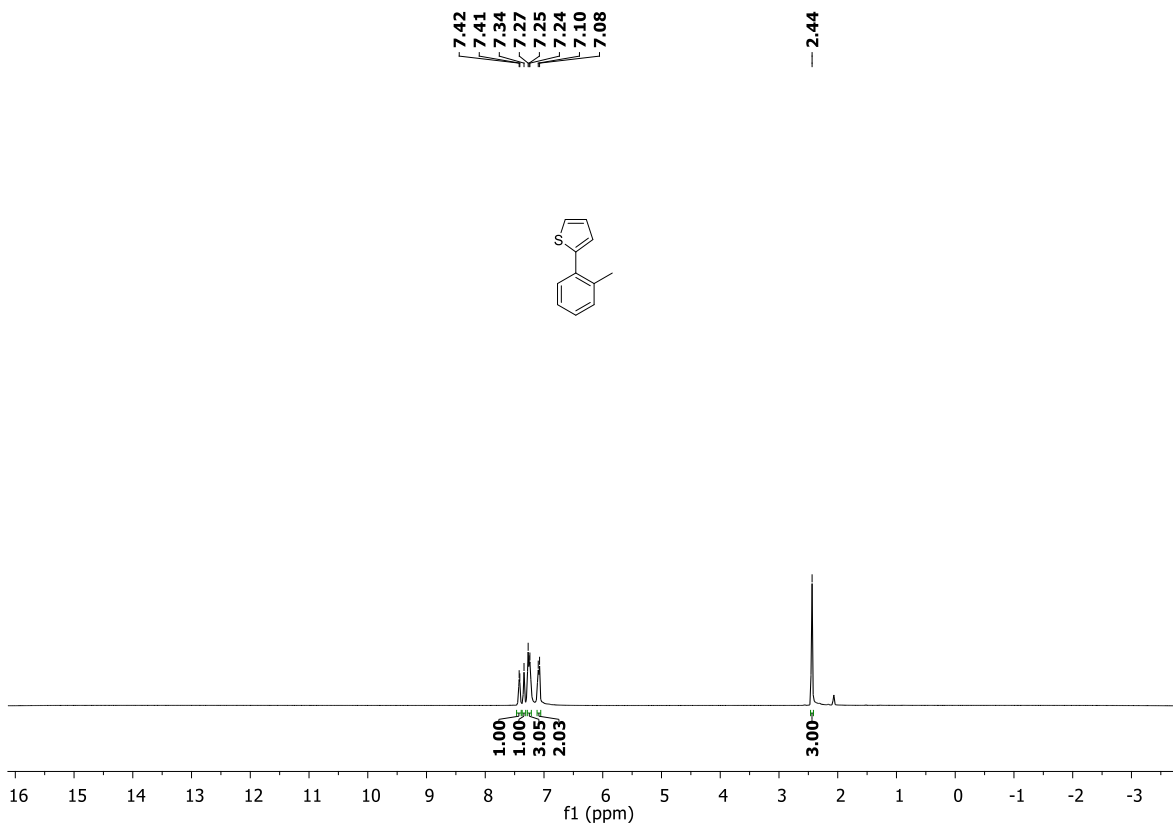

<sup>13</sup>C-NMR (CDCl<sub>3</sub>)

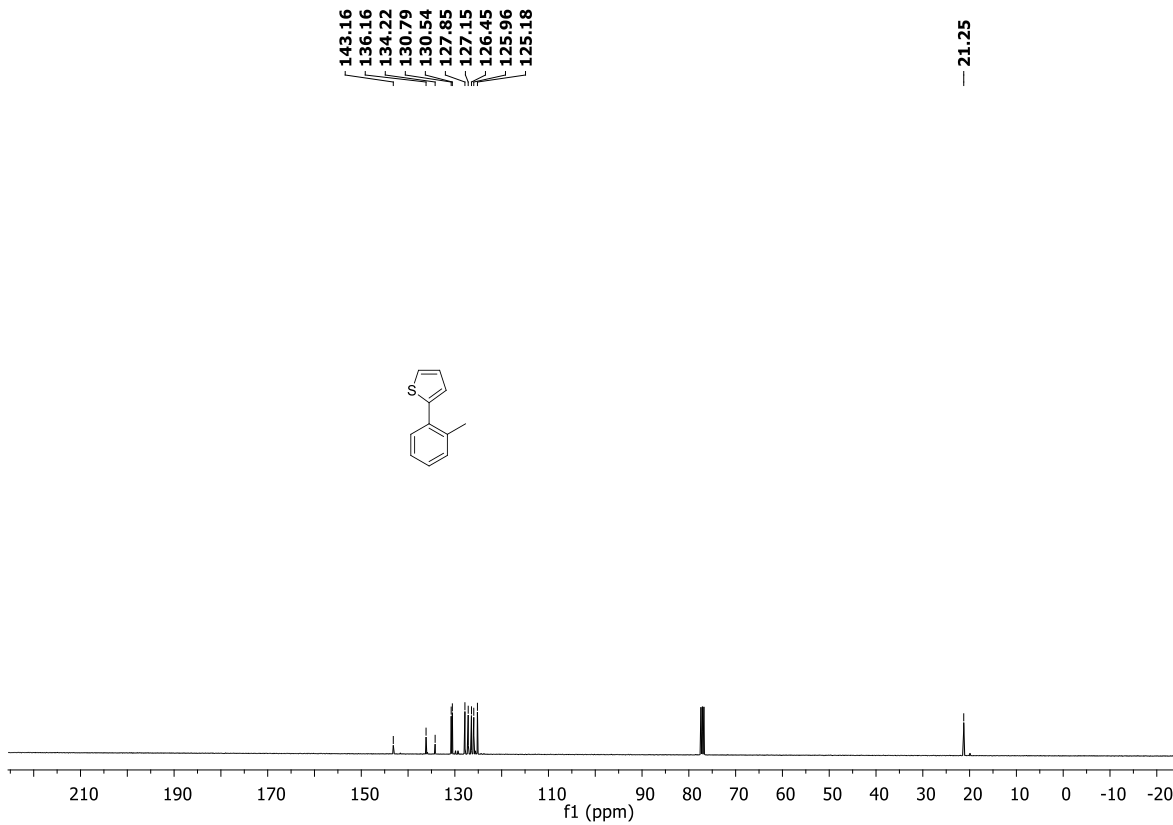

2-(2,6-Dimethylphenyl)pyridine

$^1\text{H-NMR}$  ( $\text{CDCl}_3$ )

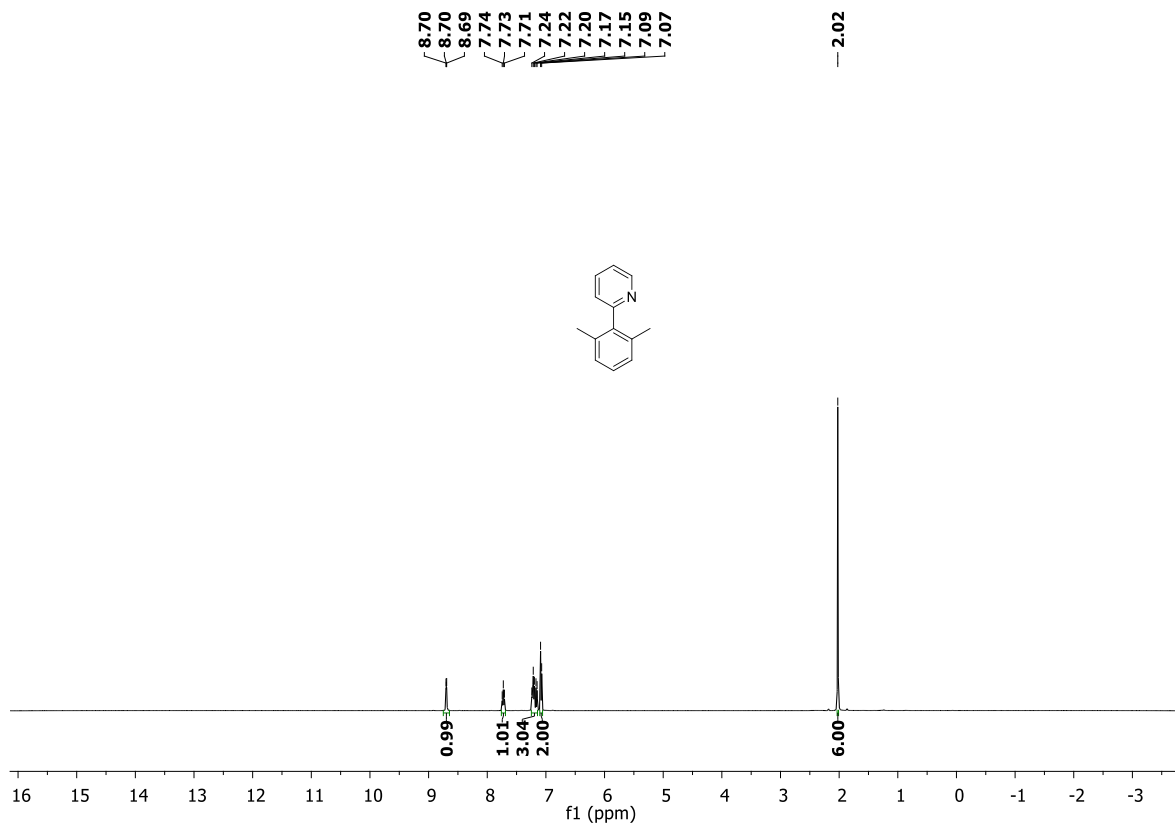

$^{13}\text{C-NMR}$  ( $\text{CDCl}_3$ )

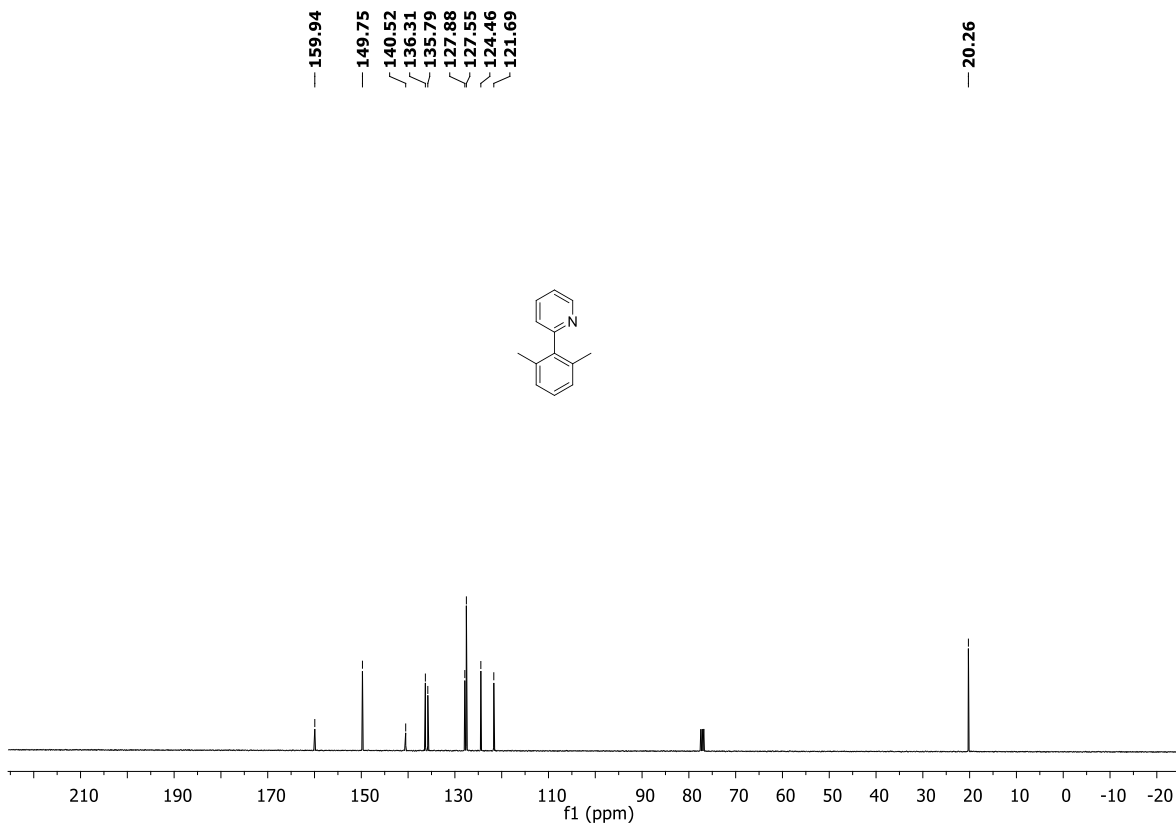

3-(2,6-Dimethylphenyl)pyridine

$^{13}\text{C}$ -NMR ( $\text{CDCl}_3$ )



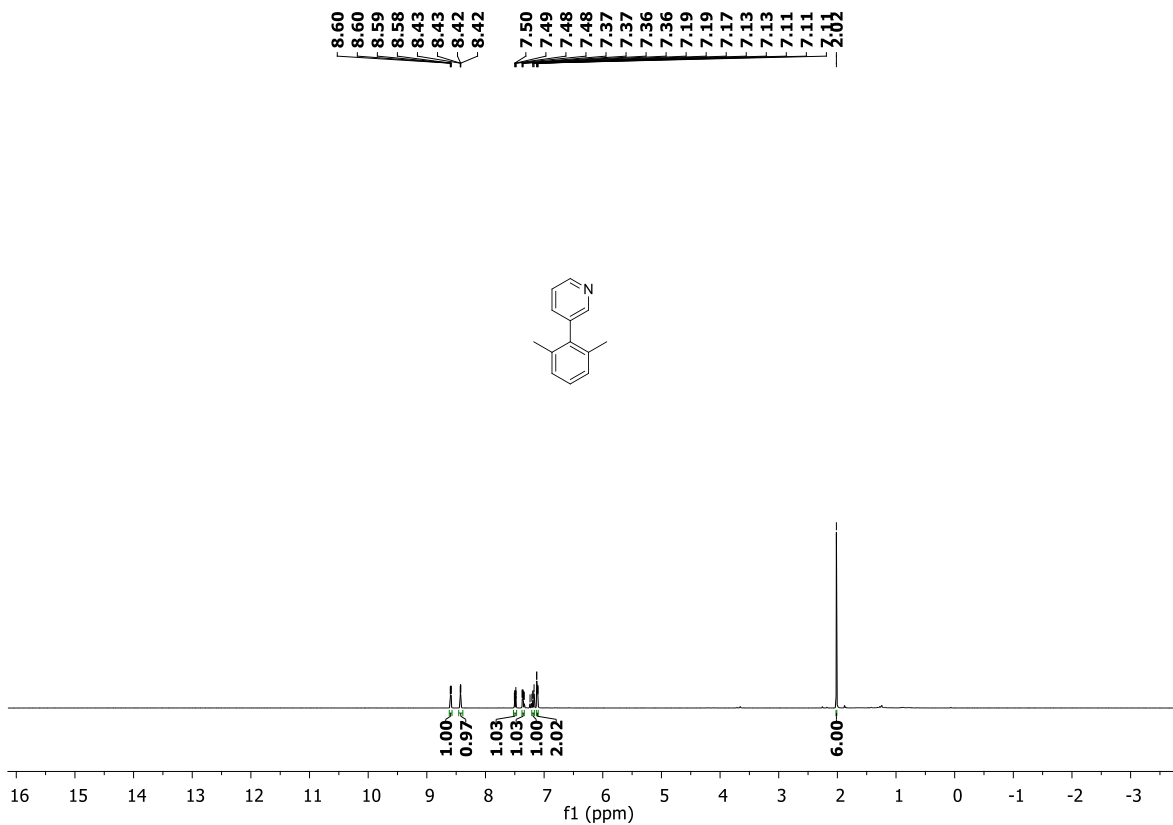

<sup>13</sup>C-NMR (CDCl<sub>3</sub>)

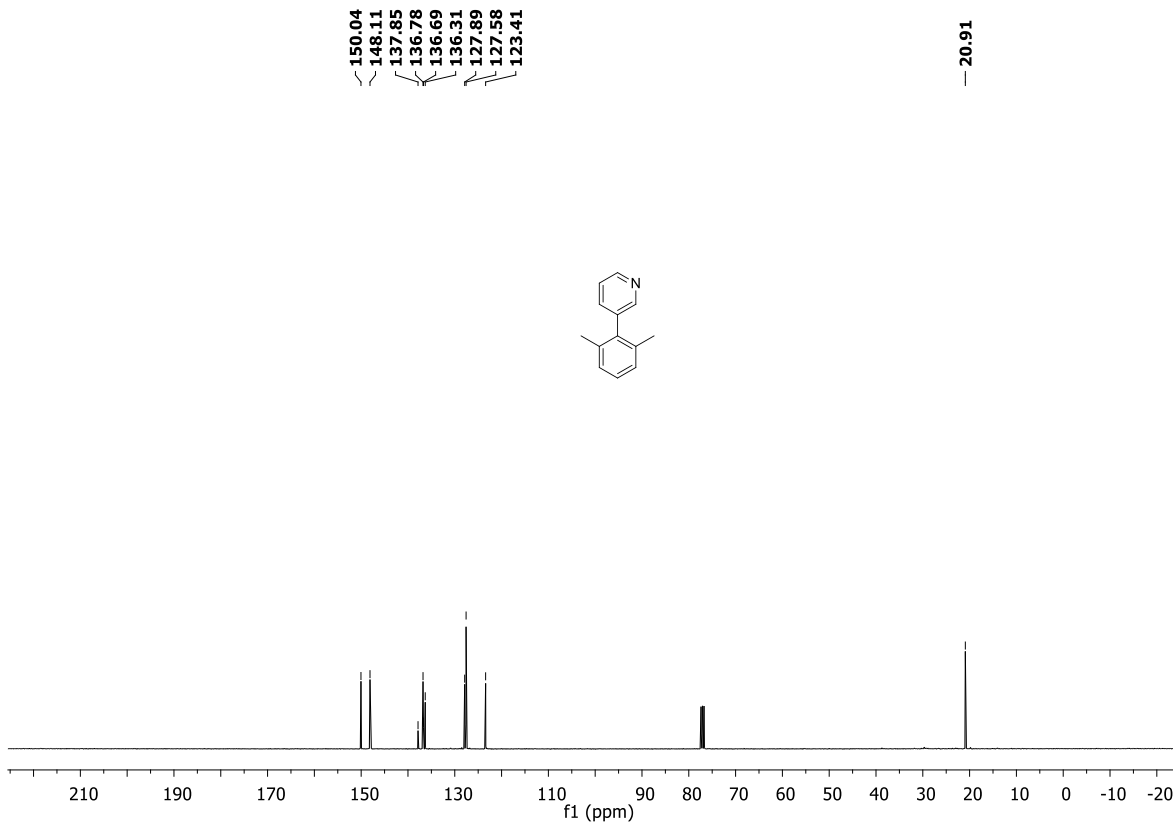

2-(2,6-dimethylphenyl)-thiophene

$^1\text{H-NMR}$  ( $\text{CDCl}_3$ )

7.41  
7.40  
7.24  
7.22  
7.20  
7.15  
7.13  
6.86  
6.85

2.19

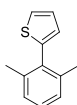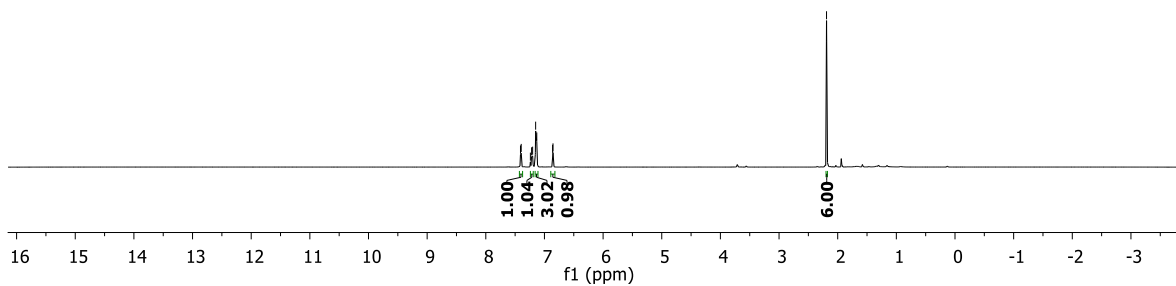

$^{13}\text{C-NMR}$  ( $\text{CDCl}_3$ )

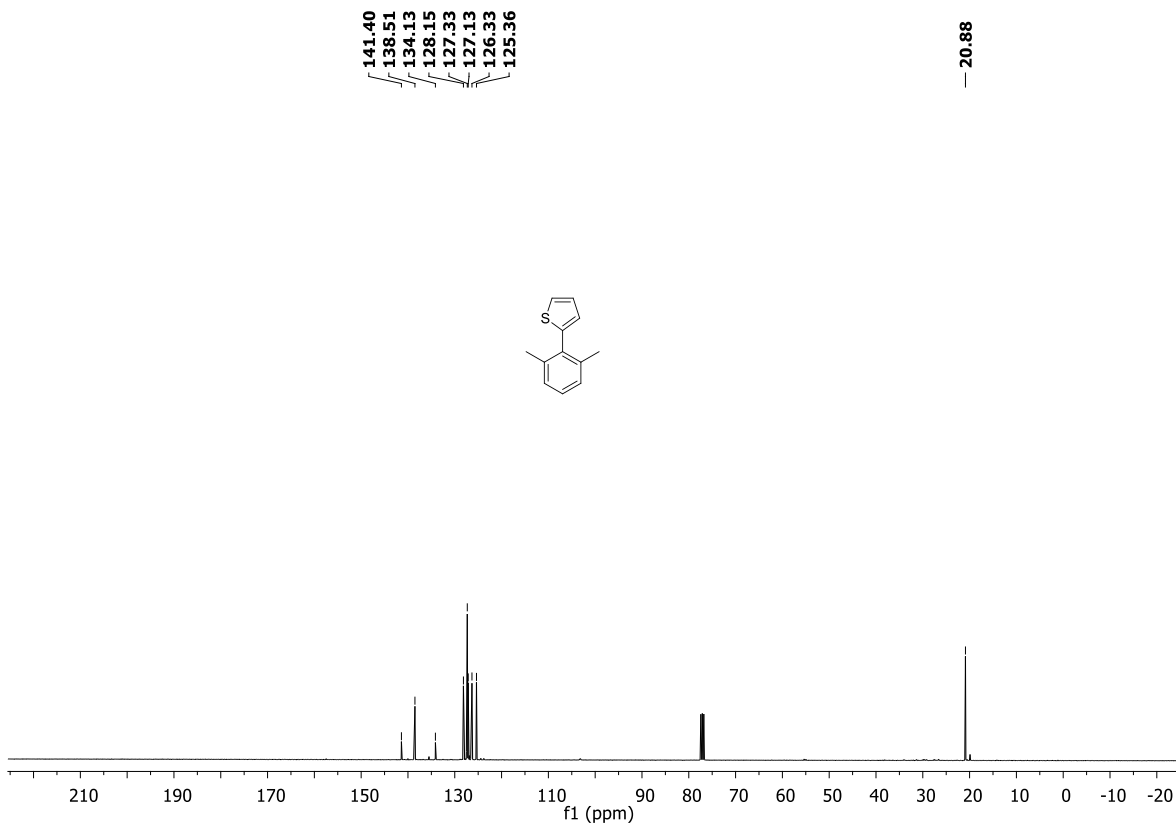

CDCl<sub>3</sub> commercial

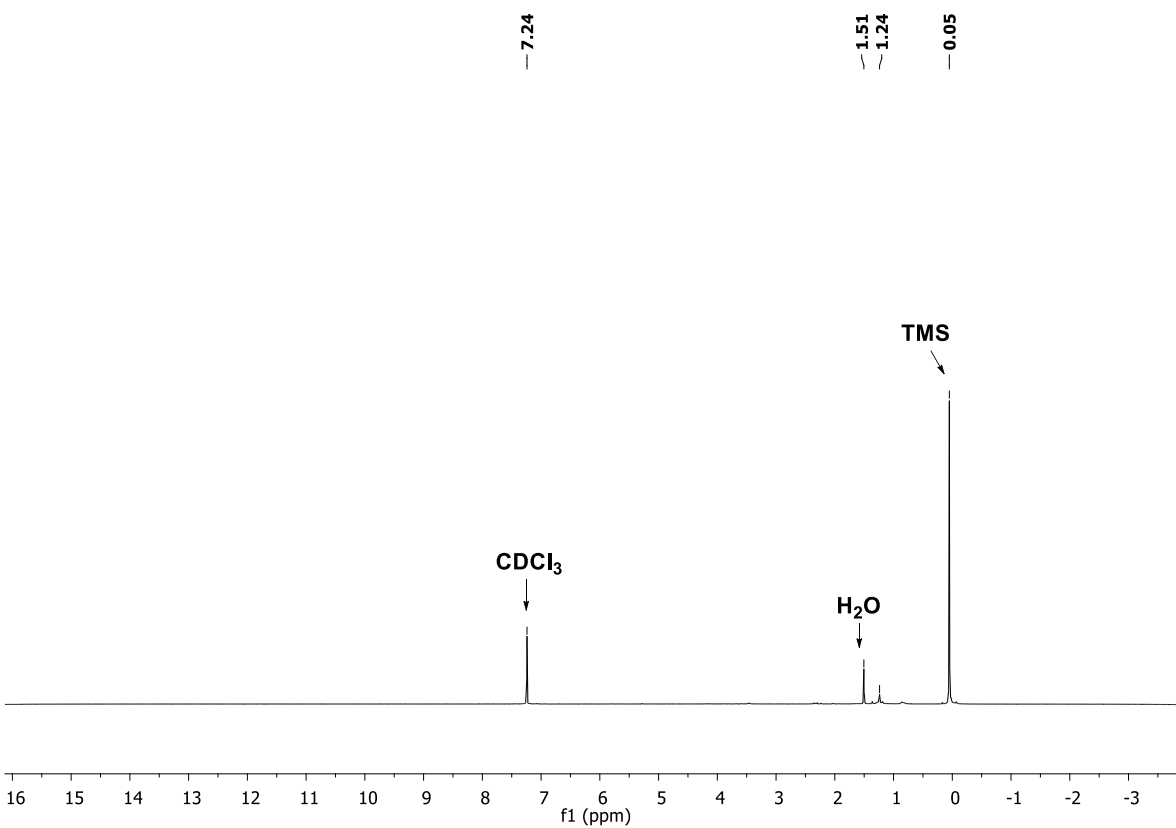

GC Data  
Room temperature optimisation

4-Bromotoluene

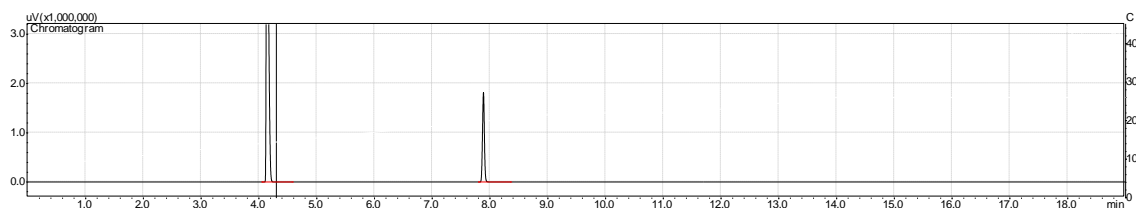

| Peak# | Ret.Time | Area       | Height    | Conc.   | Units | Mark | Compound ID# | Compound Name |
|-------|----------|------------|-----------|---------|-------|------|--------------|---------------|
| 1     | 4.140    | 18938967.5 | 6707569.1 | 0.00000 | ppm   | S    | 1            | DCM           |
| 2     | 7.887    | 4147843.9  | 1799980.9 | 0.00000 |       |      |              |               |

To

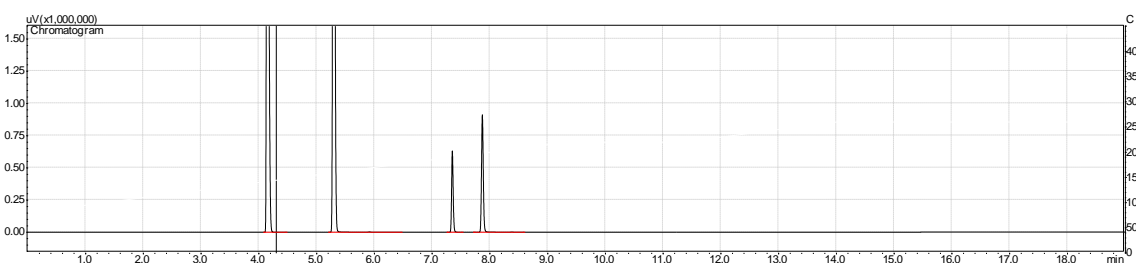

| Peak# | Ret.Time | Area       | Height    | Conc.   | Units | Mark | Compound ID# | Compound Name |
|-------|----------|------------|-----------|---------|-------|------|--------------|---------------|
| 1     | 4.145    | 14105421.0 | 5440319.4 | 0.00000 | ppm   | SV   | 1            | DCM           |
| 2     | 5.295    | 19478270.1 | 9264369.6 | 0.00000 |       | S    |              |               |
| 3     | 7.350    | 1180742.5  | 621261.6  | 0.00000 |       |      |              |               |
| 4     | 7.870    | 1958450.5  | 901354.8  | 0.00000 |       | SV   |              |               |

L1 RT THF\_KF\_

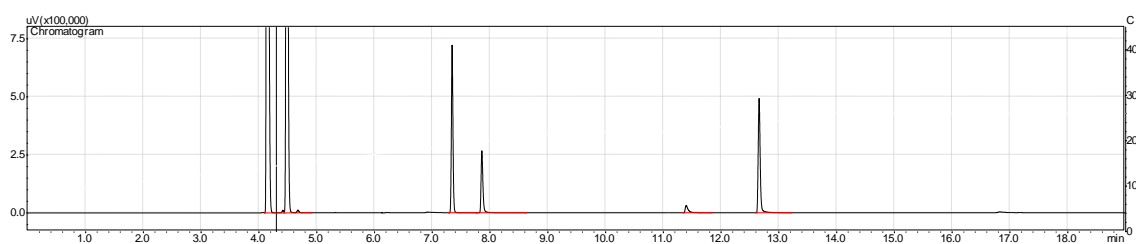

| Peak# | Ret.Time | Area       | Height    | Conc.   | Units | Mark | Compound ID# | Compound Name |
|-------|----------|------------|-----------|---------|-------|------|--------------|---------------|
| 1     | 4.142    | 11944536.4 | 5042639.2 | 0.00000 | ppm   | SV   | 1            |               |
| 2     | 4.481    | 8729420.3  | 4212115.2 | 0.00000 | ppm   | SV   | 1            |               |
| 3     | 7.344    | 1355114.2  | 716902.9  | 0.00000 | ppm   | SV   | 3            |               |

|   |        |           |          |         |  |    |  |  |
|---|--------|-----------|----------|---------|--|----|--|--|
| 4 | 7.859  | 597954.0  | 264028.3 | 0.00000 |  | SV |  |  |
| 5 | 11.396 | 118645.0  | 31735.6  | 0.00000 |  |    |  |  |
| 6 | 12.658 | 1184853.0 | 488499.5 | 0.00000 |  |    |  |  |

L3 RT THF\_KF\_

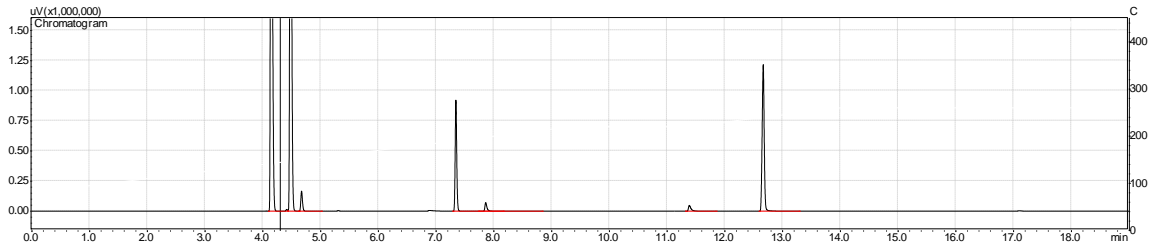

| Peak# | Ret.Time | Area       | Height    | Conc.   | Units | Mark | Compound ID# | Compound Name |
|-------|----------|------------|-----------|---------|-------|------|--------------|---------------|
| 1     | 4.143    | 10816497.8 | 4647633.0 | 0.00000 | ppm   | SV   | 1            |               |
| 2     | 4.479    | 11416156.2 | 5498279.9 | 0.00000 | ppm   | V    | 1            |               |
| 3     | 4.670    | 344889.7   | 166367.3  | 0.00000 |       | V    |              |               |
| 4     | 7.343    | 1739482.5  | 915115.0  | 0.00000 | ppm   | SV   | 3            |               |
| 5     | 7.859    | 185350.0   | 71155.6   | 0.00000 |       | T    |              |               |
| 6     | 11.385   | 164534.6   | 48528.8   | 0.00000 |       |      |              |               |
| 7     | 12.664   | 3037158.4  | 1211137.2 | 0.00000 |       | V    |              |               |

L1 RT THF\_K3PO4\_

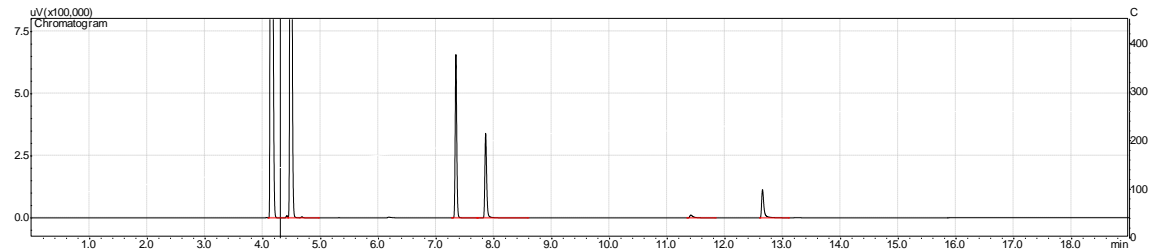

| Peak# | Ret.Time | Area       | Height    | Conc.   | Units | Mark | Compound ID# | Compound Name |
|-------|----------|------------|-----------|---------|-------|------|--------------|---------------|
| 1     | 4.141    | 12809670.2 | 5283748.3 | 0.00000 | ppm   | SV   | 1            |               |
| 2     | 4.481    | 8189442.2  | 3945931.5 | 0.00000 | ppm   | SV   | 1            |               |
| 3     | 7.341    | 1231101.7  | 644556.2  | 0.00000 | ppm   | SV   | 3            |               |
| 4     | 7.856    | 747316.8   | 337816.7  | 0.00000 |       | SV   |              |               |
| 5     | 11.408   | 50401.9    | 11558.8   | 0.00000 |       | S    |              |               |
| 6     | 12.649   | 320952.9   | 113368.1  | 0.00000 |       | V    |              |               |

L3 RT THF\_K3PO4\_

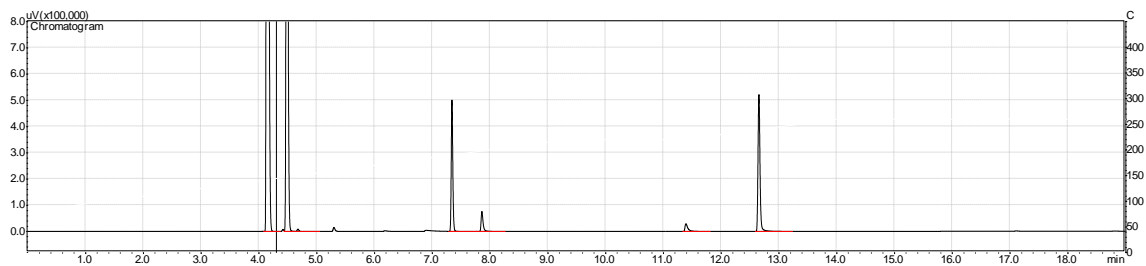

| Peak# | Ret.Time | Area       | Height    | Conc.   | Units | Mark | Compound ID# | Compound Name |
|-------|----------|------------|-----------|---------|-------|------|--------------|---------------|
| 1     | 4.140    | 13388163.8 | 5487867.3 | 0.00000 | ppm   | V    | 1            |               |
| 2     | 4.483    | 6470805.1  | 3173267.5 | 0.00000 | ppm   | SV   | 1            |               |
| 3     | 7.340    | 934011.2   | 496557.1  | 0.00000 | ppm   | SV   | 3            |               |
| 4     | 7.858    | 186707.1   | 75743.2   | 0.00000 |       | SV   |              |               |
| 5     | 11.390   | 107891.4   | 29827.1   | 0.00000 |       |      |              |               |
| 6     | 12.653   | 1253214.2  | 517106.0  | 0.00000 |       |      |              |               |

### L1 CsF T12

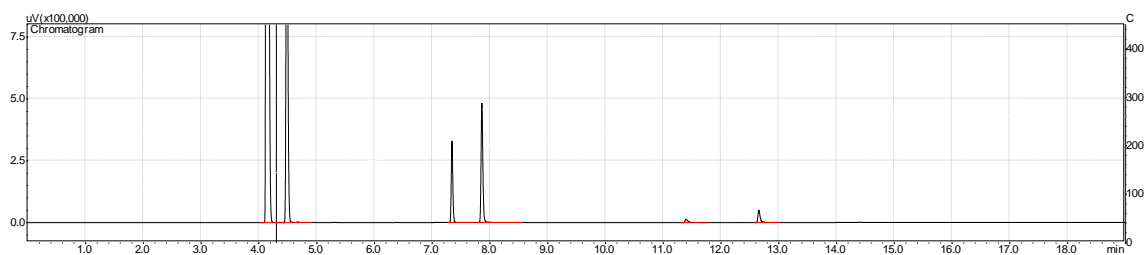

| Peak# | Ret.Time | Area       | Height    | Conc.   | Units | Mark | Compound ID# | Compound Name |
|-------|----------|------------|-----------|---------|-------|------|--------------|---------------|
| 1     | 4.134    | 18192068.6 | 6720802.1 | 0.00000 | ppm   | SV   | 1            |               |
| 2     | 4.483    | 3684036.5  | 1715451.4 | 0.00000 | ppm   | SV   | 1            |               |
| 3     | 7.342    | 611408.3   | 321847.2  | 0.00000 | ppm   | S    | 3            |               |
| 4     | 7.860    | 1025000.9  | 472633.7  | 0.00000 |       | S    |              |               |
| 5     | 11.395   | 48847.1    | 13491.2   | 0.00000 |       |      |              |               |
| 6     | 12.654   | 139147.7   | 50283.7   | 0.00000 |       |      |              |               |

### L1 TBAF T12

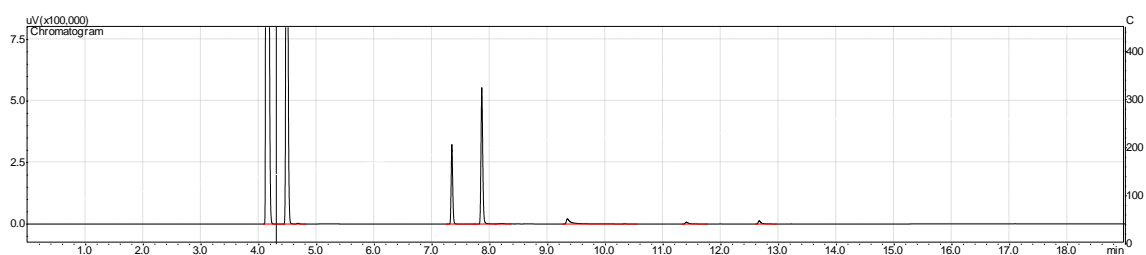

| Peak# | Ret.Time | Area | Height | Conc. | Units | Mark | Compound ID# | Compound Name |
|-------|----------|------|--------|-------|-------|------|--------------|---------------|
|-------|----------|------|--------|-------|-------|------|--------------|---------------|

|   |        |            |           |         |     |    |   |  |
|---|--------|------------|-----------|---------|-----|----|---|--|
| 1 | 4.135  | 17370489.5 | 6422791.3 | 0.00000 | ppm | SV | 1 |  |
| 2 | 4.483  | 5564450.9  | 2552664.6 | 0.00000 | ppm | S  | 1 |  |
| 3 | 7.341  | 600851.0   | 315857.9  | 0.00000 | ppm | S  | 3 |  |
| 4 | 7.860  | 1178963.8  | 543304.7  | 0.00000 |     | V  |   |  |
| 5 | 8.207  | 20019.0    | 2058.1    | 0.00000 | ppm | V  | 4 |  |
| 6 | 9.342  | 143024.1   | 21727.3   | 0.00000 | ppm | S  | 5 |  |
| 7 | 11.400 | 32276.4    | 7892.4    | 0.00000 |     |    |   |  |
| 8 | 12.663 | 46073.0    | 13794.4   | 0.00000 |     |    |   |  |

L1 K3PO4 T12

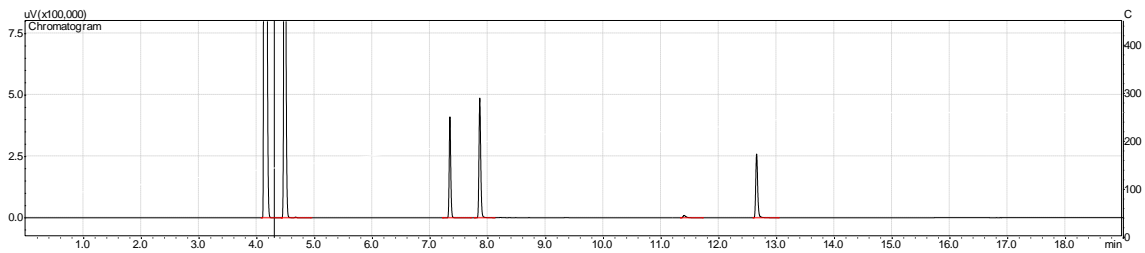

| Peak# | Ret.Time | Area       | Height    | Conc.   | Units | Mark | Compound ID# | Compound Name |
|-------|----------|------------|-----------|---------|-------|------|--------------|---------------|
| 1     | 4.135    | 16362197.6 | 6208594.1 | 0.00000 | ppm   | SV   | 1            |               |
| 2     | 4.481    | 5257455.5  | 2441932.3 | 0.00000 | ppm   | SV   | 1            |               |
| 3     | 7.342    | 767187.7   | 404069.3  | 0.00000 | ppm   | SV   | 3            |               |
| 4     | 7.859    | 1031717.1  | 480861.2  | 0.00000 |       |      |              |               |
| 5     | 11.397   | 36367.3    | 9753.6    | 0.00000 |       |      |              |               |
| 6     | 12.652   | 614233.4   | 256121.6  | 0.00000 |       |      |              |               |

L1 CsCO3

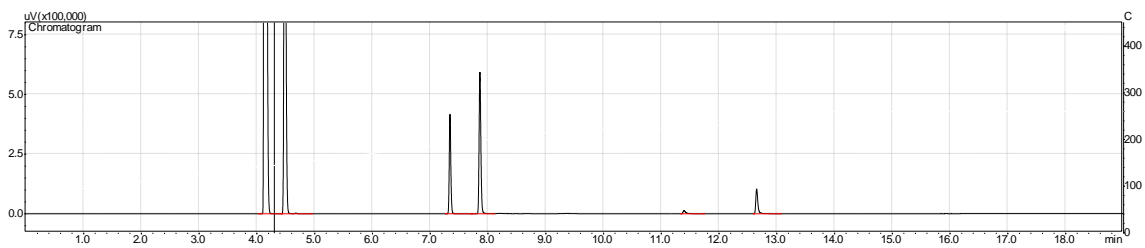

| Peak# | Ret.Time | Area       | Height    | Conc.   | Units | Mark | Compound ID# | Compound Name |
|-------|----------|------------|-----------|---------|-------|------|--------------|---------------|
| 1     | 4.135    | 17586057.9 | 6483013.0 | 0.00000 | ppm   | SV   | 1            |               |
| 2     | 4.483    | 5310398.9  | 2440835.8 | 0.00000 | ppm   | SV   | 1            |               |
| 3     | 7.342    | 777246.7   | 411142.1  | 0.00000 | ppm   | SV   | 3            |               |
| 4     | 7.860    | 1260616.6  | 587063.6  | 0.00000 |       | V    |              |               |
| 5     | 11.394   | 46868.2    | 13426.7   | 0.00000 |       |      |              |               |
| 6     | 12.651   | 262046.1   | 102861.9  | 0.00000 |       |      |              |               |

L1 Cy2NMe T12

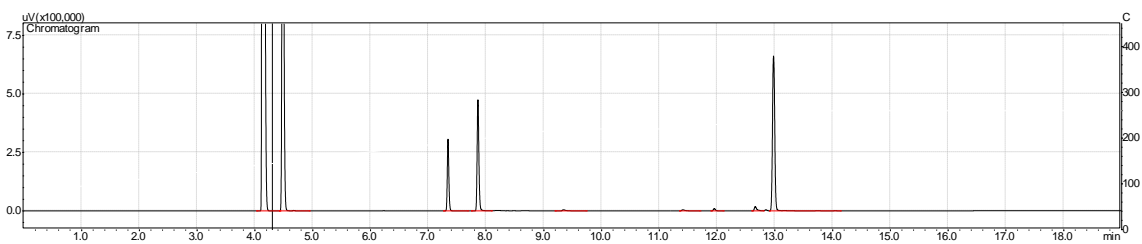

| Peak# | Ret.Time | Area       | Height    | Conc.   | Units | Mark | Compound ID# | Compound Name |
|-------|----------|------------|-----------|---------|-------|------|--------------|---------------|
| 1     | 4.135    | 16292430.9 | 6159534.2 | 0.00000 | ppm   | SV   | 1            |               |
| 2     | 4.482    | 5059191.6  | 2366068.9 | 0.00000 | ppm   | SV   | 1            |               |
| 3     | 7.342    | 569747.5   | 301707.2  | 0.00000 | ppm   | S    | 3            |               |
| 4     | 7.860    | 1006471.5  | 467850.0  | 0.00000 |       |      |              |               |
| 5     | 9.340    | 22084.0    | 4651.1    | 0.00000 | ppm   |      | 5            |               |
| 6     | 11.408   | 20106.3    | 4845.4    | 0.00000 |       |      |              |               |
| 7     | 11.951   | 25508.2    | 10077.2   | 0.00000 |       |      |              |               |
| 8     | 12.660   | 56606.9    | 18680.6   | 0.00000 |       |      |              |               |
| 9     | 12.977   | 1813212.4  | 660606.3  | 0.00000 |       | SV   |              |               |

### L3 CsF T12

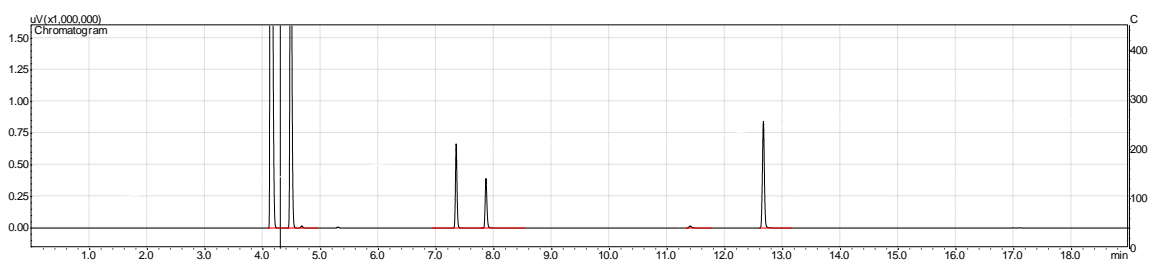

| Peak# | Ret.Time | Area       | Height    | Conc.   | Units | Mark | Compound ID# | Compound Name |
|-------|----------|------------|-----------|---------|-------|------|--------------|---------------|
| 1     | 4.138    | 16237513.2 | 6157085.5 | 0.00000 | ppm   | SV   | 1            |               |
| 2     | 4.483    | 7244571.5  | 3344451.2 | 0.00000 | ppm   | SV   | 1            |               |
| 3     | 7.346    | 1267162.6  | 651028.7  | 0.00000 | ppm   | S    | 3            |               |
| 4     | 7.862    | 846343.1   | 391365.4  | 0.00000 |       | SV   |              |               |
| 5     | 11.395   | 55664.5    | 16484.4   | 0.00000 |       |      |              |               |
| 6     | 12.665   | 2016324.0  | 836639.5  | 0.00000 |       |      |              |               |

### L3 TBAF T12

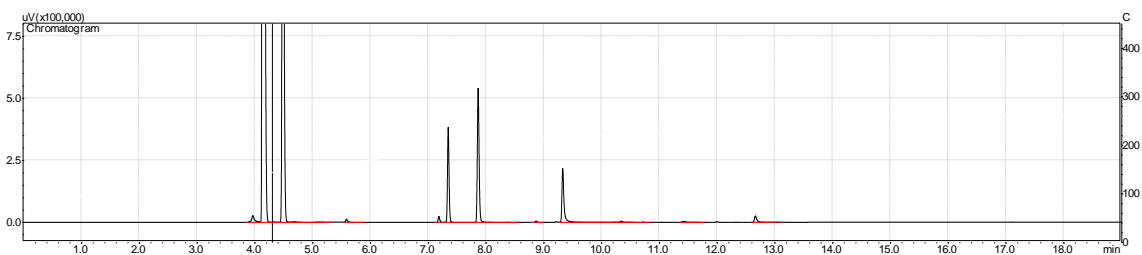



| Peak# | Ret.Time | Area       | Height    | Conc.   | Units | Mark | Compound ID# | Compound Name |
|-------|----------|------------|-----------|---------|-------|------|--------------|---------------|
| 1     | 3.963    | 108005.2   | 27828.8   | 0.00000 |       | V    |              |               |
| 2     | 4.137    | 16220993.5 | 6166981.2 | 0.00000 | ppm   | SV   | 1            |               |
| 3     | 4.483    | 5834574.4  | 2727308.5 | 0.00000 | ppm   | V    | 1            |               |
| 4     | 4.676    | 26287.8    | 3290.6    | 0.00000 |       | V    |              |               |
| 5     | 5.091    | 18494.1    | 1411.0    | 0.00000 |       | V    |              |               |
| 6     | 5.584    | 31715.2    | 13153.0   | 0.00000 |       | SV   |              |               |
| 7     | 7.183    | 46465.3    | 23394.8   | 0.00000 | ppm   | V    | 3            |               |
| 8     | 7.345    | 713825.3   | 379684.2  | 0.00000 | ppm   | SV   | 3            |               |
| 9     | 7.863    | 1146047.0  | 535960.3  | 0.00000 |       | S    |              |               |
| 10    | 8.866    | 10568.8    | 5408.2    | 0.00000 |       |      |              |               |
| 11    | 9.327    | 563596.9   | 215874.9  | 0.00000 | ppm   | SV   | 5            |               |
| 12    | 10.339   | 11773.6    | 4872.7    | 0.00000 |       | T    |              |               |
| 13    | 11.414   | 19083.7    | 4218.0    | 0.00000 |       |      |              |               |
| 14    | 12.661   | 77321.1    | 25250.1   | 0.00000 |       | S    |              |               |

L3 K3PO4 T12

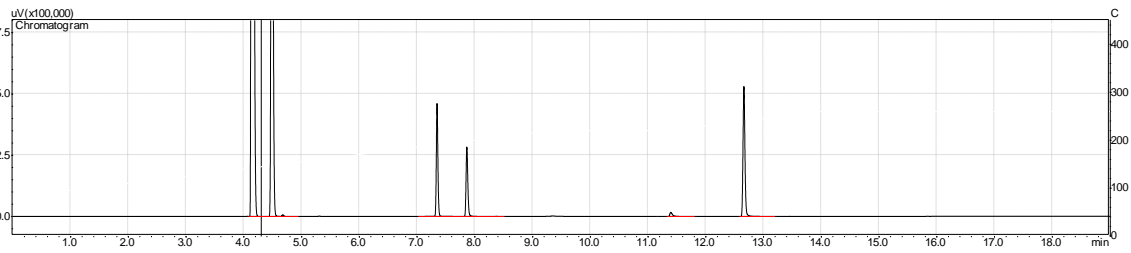

| Peak# | Ret.Time | Area       | Height    | Conc.   | Units | Mark | Compound ID# | Compound Name |
|-------|----------|------------|-----------|---------|-------|------|--------------|---------------|
| 1     | 4.139    | 17130818.0 | 6329858.3 | 0.00000 | ppm   | SV   | 1            |               |
| 2     | 4.485    | 7401203.4  | 3333914.0 | 0.00000 | ppm   | SV   | 1            |               |
| 3     | 7.346    | 883351.8   | 451454.6  | 0.00000 | ppm   | SV   | 3            |               |
| 4     | 7.862    | 610876.8   | 281979.3  | 0.00000 |       | SV   |              |               |
| 5     | 11.394   | 56848.8    | 16952.8   | 0.00000 |       |      |              |               |
| 6     | 12.660   | 1236680.0  | 527551.4  | 0.00000 |       |      |              |               |

L3 CsCO3

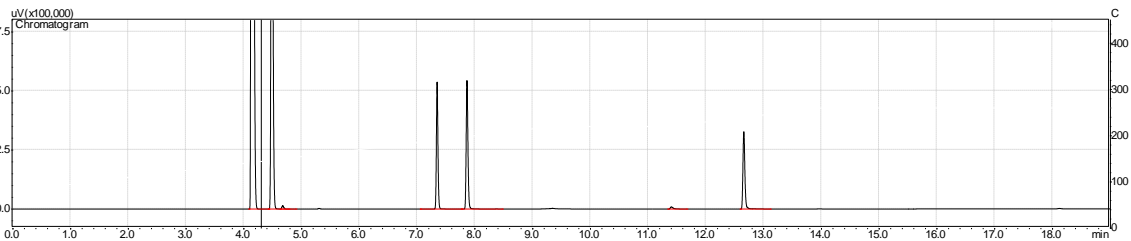

| Peak# | Ret.Time | Area | Height | Conc. | Units | Mark | Compound ID# | Compound Name |
|-------|----------|------|--------|-------|-------|------|--------------|---------------|
|-------|----------|------|--------|-------|-------|------|--------------|---------------|

|   |        |            |           |         |     |    |   |  |
|---|--------|------------|-----------|---------|-----|----|---|--|
| 1 | 4.137  | 17248925.5 | 6432912.0 | 0.00000 | ppm | SV | 1 |  |
| 2 | 4.484  | 5248451.1  | 2425953.9 | 0.00000 | ppm | SV | 1 |  |
| 3 | 4.673  | 32190.2    | 14596.4   | 0.00000 |     | T  |   |  |
| 4 | 7.346  | 1009120.5  | 525123.8  | 0.00000 | ppm | SV | 3 |  |
| 5 | 7.863  | 1149304.6  | 536562.2  | 0.00000 |     | SV |   |  |
| 6 | 11.402 | 33762.0    | 9231.9    | 0.00000 |     |    |   |  |
| 7 | 12.656 | 772320.0   | 323087.1  | 0.00000 |     | S  |   |  |

L3 Cy2NMe T12

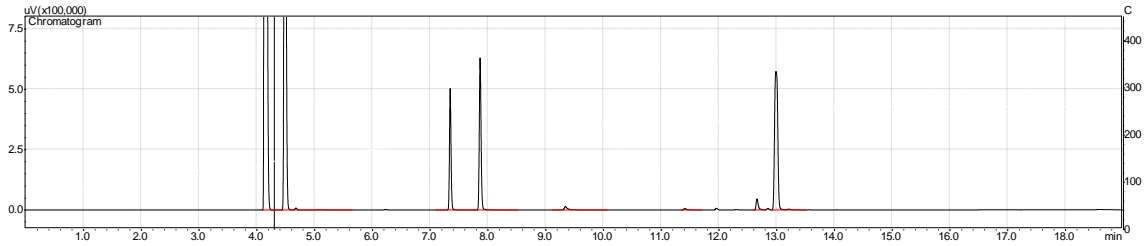

| Peak# | Ret.Time | Area       | Height    | Conc.   | Units | Mark | Compound ID# | Compound Name |
|-------|----------|------------|-----------|---------|-------|------|--------------|---------------|
| 1     | 4.139    | 16427903.9 | 6167123.7 | 0.00000 | ppm   | SV   | 1            |               |
| 2     | 4.484    | 7221468.7  | 3303704.3 | 0.00000 | ppm   | SV   | 1            |               |
| 3     | 7.346    | 946343.8   | 491987.8  | 0.00000 | ppm   | SV   | 3            |               |
| 4     | 7.865    | 1342543.1  | 620163.7  | 0.00000 |       | SV   |              |               |
| 5     | 9.341    | 63667.8    | 14249.5   | 0.00000 | ppm   | S    | 5            |               |
| 6     | 11.407   | 22982.7    | 5931.6    | 0.00000 |       |      |              |               |
| 7     | 12.658   | 123889.8   | 46048.6   | 0.00000 |       |      |              |               |
| 8     | 12.987   | 2216486.7  | 573761.8  | 0.00000 |       | V    |              |               |
| 9     | 13.208   | 20036.4    | 3595.1    | 0.00000 |       | V    |              |               |

L1 RT\_THF\_KOH\_

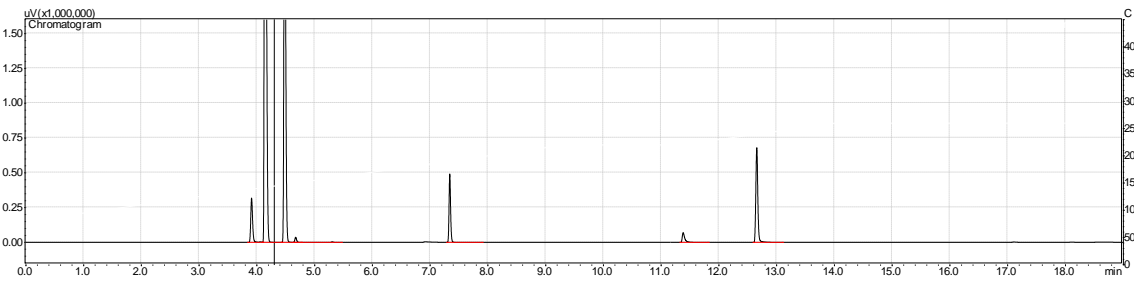

| Peak# | Ret.Time | Area       | Height    | Conc.   | Units | Mark | Compound ID# | Compound Name |
|-------|----------|------------|-----------|---------|-------|------|--------------|---------------|
| 1     | 3.908    | 724841.5   | 318070.0  | 0.00000 |       | SV   |              |               |
| 2     | 4.141    | 12110624.8 | 5074461.6 | 0.00000 | ppm   | SV   | 1            |               |
| 3     | 4.481    | 7197512.1  | 3500147.2 | 0.00000 | ppm   | SV   | 1            |               |
| 4     | 4.671    | 76247.4    | 36275.8   | 0.00000 |       | T    |              |               |
| 5     | 7.340    | 922137.8   | 485746.8  | 0.00000 | ppm   | SV   | 3            |               |

|   |        |           |          |         |  |  |  |  |
|---|--------|-----------|----------|---------|--|--|--|--|
| 6 | 11.382 | 79578.2   | 69397.9  | 0.00000 |  |  |  |  |
| 7 | 12.656 | 1636017.5 | 672532.7 | 0.00000 |  |  |  |  |

L3 RT\_THF\_KOH\_

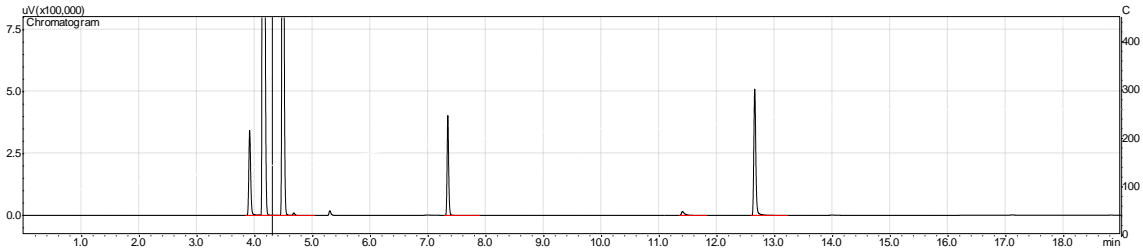

| Peak# | Ret.Time | Area       | Height    | Conc.   | Units | Mark | Compound ID# | Compound Name |
|-------|----------|------------|-----------|---------|-------|------|--------------|---------------|
| 1     | 3.909    | 777136.3   | 342264.9  | 0.00000 |       | SV   |              |               |
| 2     | 4.140    | 12677924.9 | 5230094.5 | 0.00000 | ppm   | SV   | 1            |               |
| 3     | 4.482    | 6659770.0  | 3251311.0 | 0.00000 | ppm   | SV   | 1            |               |
| 4     | 7.339    | 761469.3   | 401384.0  | 0.00000 | ppm   | SV   | 3            |               |
| 5     | 11.402   | 66680.7    | 15860.1   | 0.00000 |       |      |              |               |
| 6     | 12.652   | 1230300.3  | 502719.0  | 0.00000 |       |      |              |               |

L1 RT DIOXANE\_K3PO4\_

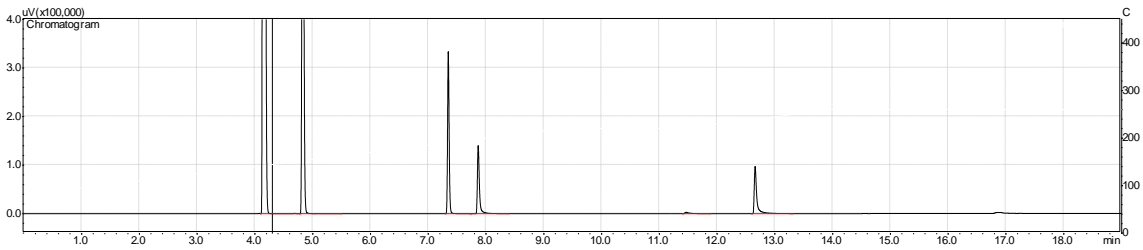

| Peak# | Ret.Time | Area       | Height    | Conc.   | Units | Mark | Compound ID# | Compound Name |
|-------|----------|------------|-----------|---------|-------|------|--------------|---------------|
| 1     | 4.145    | 13502683.2 | 5510217.2 | 0.00000 | ppm   | SV   | 1            |               |
| 2     | 4.827    | 2952194.4  | 1459853.5 | 0.00000 |       | SV   |              |               |
| 3     | 7.347    | 626812.9   | 326798.2  | 0.00000 | ppm   | SV   | 3            |               |
| 4     | 7.864    | 340236.1   | 137951.8  | 0.00000 |       | V    |              |               |
| 5     | 11.463   | 18188.1    | 3049.5    | 0.00000 |       |      |              |               |
| 6     | 12.658   | 296378.1   | 96199.4   | 0.00000 |       |      |              |               |

L3 RT DIOXANE\_K3PO4\_

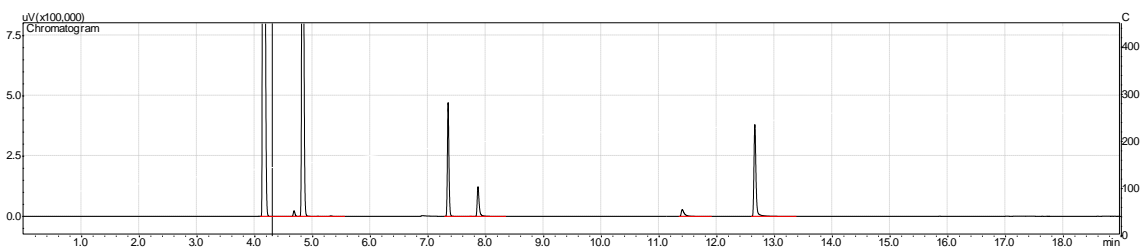

| Peak# | Ret.Time | Area       | Height    | Conc.   | Units | Mark | Compound ID# | Compound Name |
|-------|----------|------------|-----------|---------|-------|------|--------------|---------------|
| 1     | 4.147    | 12123367.3 | 5090233.5 | 0.00000 | ppm   | SV   | 1            |               |
| 2     | 4.827    | 5919447.5  | 2878865.3 | 0.00000 |       | SV   |              |               |
| 3     | 7.346    | 880265.8   | 461082.8  | 0.00000 | ppm   | SV   | 3            |               |
| 4     | 7.864    | 298864.9   | 122068.7  | 0.00000 |       | SV   |              |               |
| 5     | 11.401   | 111690.1   | 28489.6   | 0.00000 |       |      |              |               |
| 6     | 12.658   | 938724.2   | 376243.1  | 0.00000 |       |      |              |               |

L1\_RT TOLUENE\_K3PO4\_

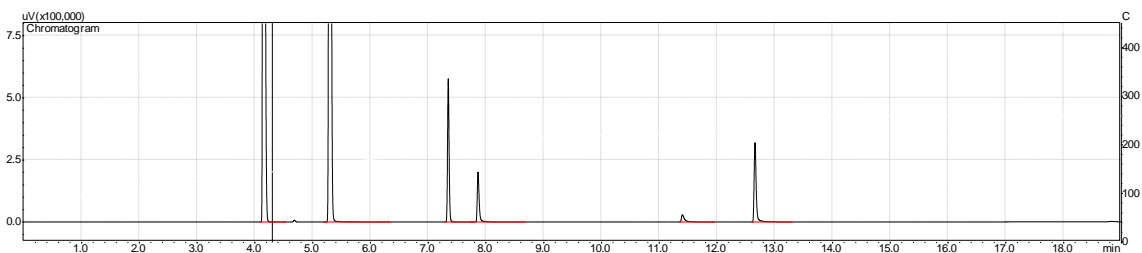

| Peak# | Ret.Time | Area       | Height    | Conc.   | Units | Mark | Compound ID# | Compound Name |
|-------|----------|------------|-----------|---------|-------|------|--------------|---------------|
| 1     | 4.147    | 12384790.0 | 5181617.7 | 0.00000 | ppm   | SV   | 1            |               |
| 2     | 5.296    | 19348770.9 | 9322889.9 | 0.00000 |       | SV   |              |               |
| 3     | 7.347    | 1077437.0  | 567905.4  | 0.00000 | ppm   | SV   | 3            |               |
| 4     | 7.863    | 467011.5   | 199190.0  | 0.00000 |       | SV   |              |               |
| 5     | 11.401   | 115162.4   | 29164.0   | 0.00000 |       |      |              |               |
| 6     | 12.658   | 800004.1   | 316540.5  | 0.00000 |       | V    |              |               |

L3\_RT TOLUENE\_K3PO4\_

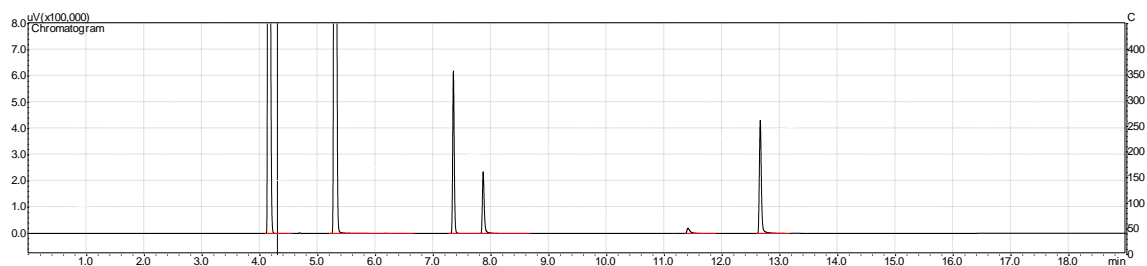

| Peak# | Ret.Time | Area       | Height     | Conc.   | Units | Mark | Compound ID# | Compound Name |
|-------|----------|------------|------------|---------|-------|------|--------------|---------------|
| 1     | 4.148    | 12183969.1 | 5107041.2  | 0.00000 | ppm   | SV   | 1            |               |
| 2     | 5.297    | 22817139.4 | 10789879.6 | 0.00000 |       | SV   |              |               |
| 3     | 7.348    | 1160102.2  | 614239.7   | 0.00000 | ppm   | S    | 3            |               |
| 4     | 7.863    | 542849.1   | 233831.5   | 0.00000 |       | SV   |              |               |
| 5     | 11.408   | 85373.8    | 20528.9    | 0.00000 |       |      |              |               |
| 6     | 12.659   | 1050371.6  | 428293.5   | 0.00000 |       |      |              |               |

#### L1 RT TOLUENE KOH

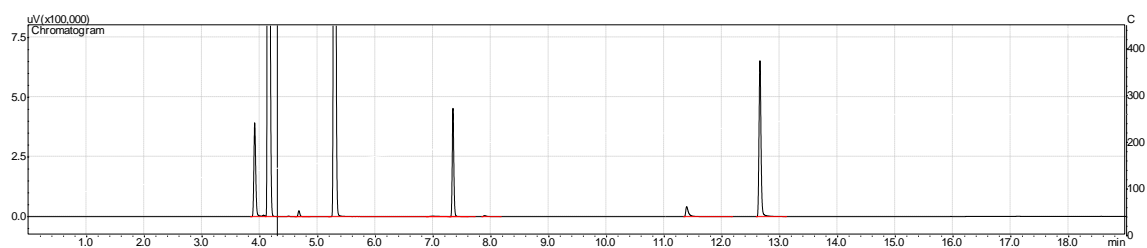

| Peak# | Ret.Time | Area       | Height    | Conc.   | Units | Mark | Compound ID# | Compound Name |
|-------|----------|------------|-----------|---------|-------|------|--------------|---------------|
| 1     | 3.910    | 887116.7   | 390708.5  | 0.00000 |       | SV   |              |               |
| 2     | 4.143    | 12386709.7 | 5168522.4 | 0.00000 | ppm   | SV   | 1            |               |
| 3     | 4.675    | 54423.5    | 25042.1   | 0.00000 |       | T    |              |               |
| 4     | 5.290    | 14249310.5 | 6997260.1 | 0.00000 |       | S    |              |               |
| 5     | 7.004    | 27653.9    | 2055.2    | 0.00000 | ppm   | T    | 3            |               |
| 6     | 7.342    | 847038.0   | 444194.6  | 0.00000 | ppm   | TV   | 3            |               |
| 7     | 7.888    | 16226.3    | 4187.8    | 0.00000 |       |      |              |               |
| 8     | 11.388   | 148627.2   | 41913.7   | 0.00000 |       | SV   |              |               |
| 9     | 12.656   | 1576461.6  | 645009.9  | 0.00000 |       |      |              |               |

#### L3 RT TOLUENE KOH

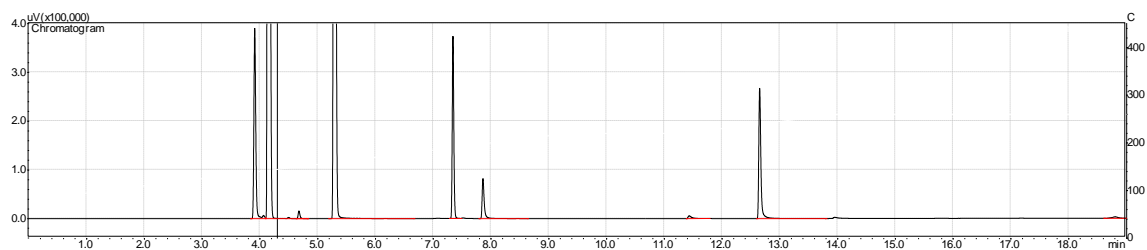

| Peak# | Ret.Time | Area       | Height    | Conc.   | Units | Mark | Compound ID# | Compound Name |
|-------|----------|------------|-----------|---------|-------|------|--------------|---------------|
| 1     | 3.910    | 887214.7   | 388577.5  | 0.00000 |       | SV   |              |               |
| 2     | 4.142    | 12742468.1 | 5283333.0 | 0.00000 | ppm   | SV   | 1            |               |
| 3     | 4.675    | 33811.3    | 15609.9   | 0.00000 |       | T    |              |               |
| 4     | 5.290    | 12606460.1 | 6210109.8 | 0.00000 |       | S    |              |               |
| 5     | 7.341    | 694271.6   | 364732.2  | 0.00000 | ppm   |      | 3            |               |
| 6     | 7.860    | 209377.2   | 81455.7   | 0.00000 |       | SV   |              |               |
| 7     | 11.431   | 27586.6    | 5789.1    | 0.00000 |       |      |              |               |
| 8     | 12.651   | 672869.7   | 265862.0  | 0.00000 |       | SV   |              |               |
| 9     | 18.805   | 22993.6    | 2985.9    | 0.00000 | ppm   |      | 8            |               |

#### L1 RT TOLUENE K2CO3

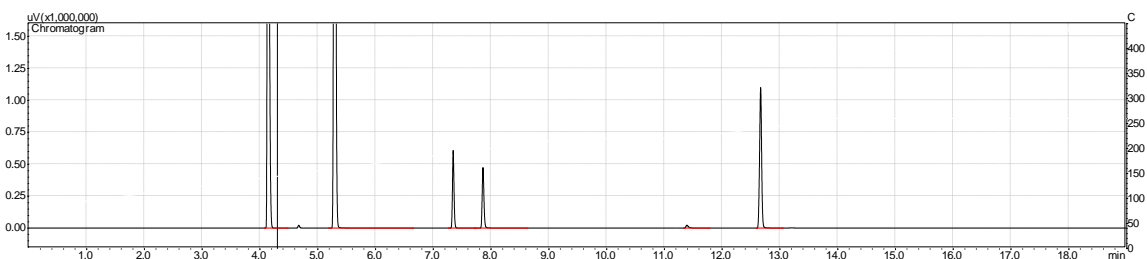

| Peak# | Ret.Time | Area       | Height     | Conc.   | Units | Mark | Compound ID# | Compound Name |
|-------|----------|------------|------------|---------|-------|------|--------------|---------------|
| 1     | 4.138    | 11536875.2 | 4886854.7  | 0.00000 | ppm   | V    | 1            |               |
| 2     | 5.291    | 20925943.2 | 10009744.5 | 0.00000 |       | SV   |              |               |
| 3     | 7.344    | 1127325.4  | 601772.8   | 0.00000 | ppm   | S    | 3            |               |
| 4     | 7.860    | 1009939.2  | 466157.3   | 0.00000 |       | SV   |              |               |
| 5     | 11.390   | 76200.3    | 22912.8    | 0.00000 |       |      |              |               |
| 6     | 12.666   | 2717608.8  | 1085679.3  | 0.00000 |       | V    |              |               |

#### L3 RT TOLUENE K2CO3

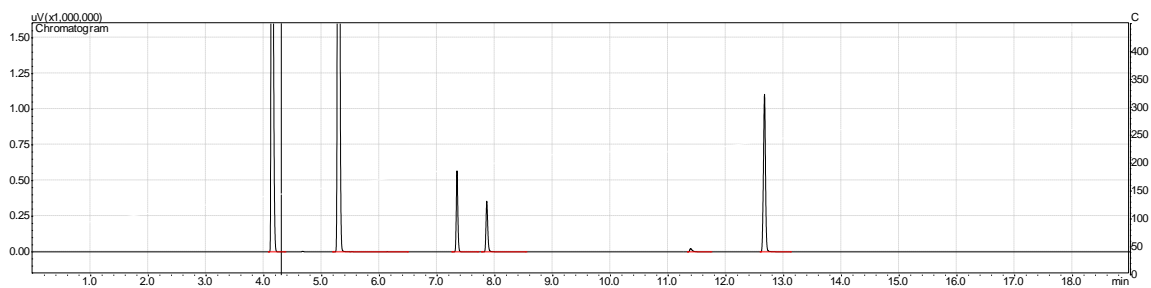

| Peak# | Ret.Time | Area       | Height     | Conc.   | Units | Mark | Compound ID# | Compound Name |
|-------|----------|------------|------------|---------|-------|------|--------------|---------------|
| 1     | 4.138    | 11589447.2 | 4902433.3  | 0.00000 | ppm   | V    | 1            |               |
| 2     | 5.291    | 21292447.7 | 10180164.1 | 0.00000 |       | SV   |              |               |
| 3     | 7.344    | 1053197.3  | 562658.8   | 0.00000 | ppm   | S    | 3            |               |
| 4     | 7.859    | 760809.3   | 349811.6   | 0.00000 |       | S    |              |               |
| 5     | 11.390   | 76090.5    | 23246.2    | 0.00000 |       |      |              |               |
| 6     | 12.668   | 2739811.8  | 1098930.7  | 0.00000 |       | S    |              |               |

#### L1 RT DMA K2CO3

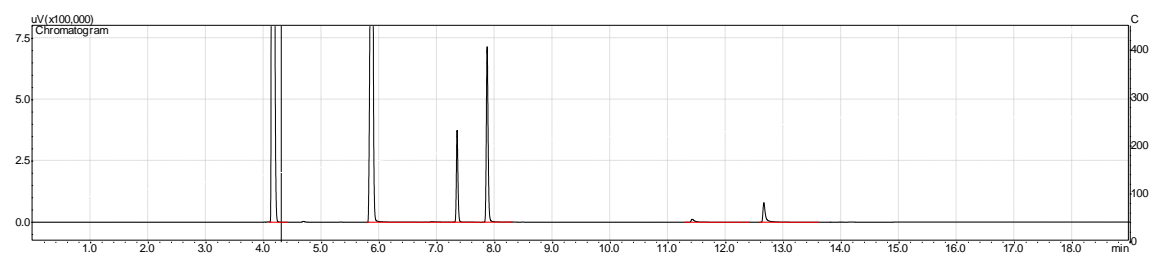

| Peak# | Ret.Time | Area       | Height    | Conc.   | Units | Mark | Compound ID# | Compound Name |
|-------|----------|------------|-----------|---------|-------|------|--------------|---------------|
| 1     | 4.147    | 14859921.5 | 5632825.6 | 0.00000 | ppm   | V    | 1            |               |
| 2     | 5.872    | 6716732.9  | 2167832.7 | 0.00000 |       | SV   |              |               |
| 3     | 7.346    | 701521.4   | 365071.3  | 0.00000 | ppm   | SV   | 3            |               |
| 4     | 7.867    | 1538366.8  | 712169.7  | 0.00000 |       |      |              |               |
| 5     | 11.418   | 57834.7    | 12241.3   | 0.00000 |       | SV   |              |               |
| 6     | 12.659   | 250091.7   | 79429.8   | 0.00000 |       | S    |              |               |

#### L3 RT DMA K2CO3

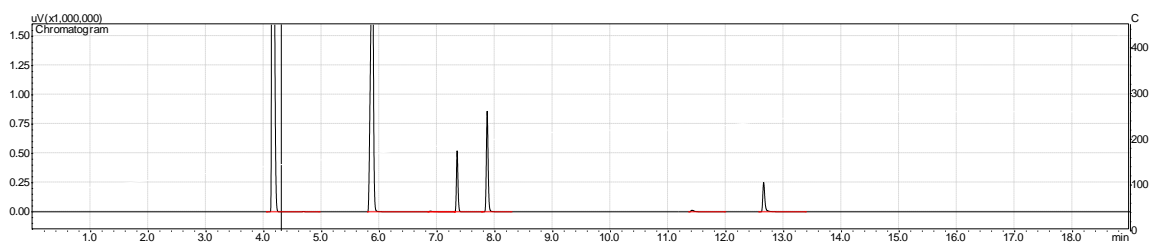

| Peak# | Ret.Time | Area       | Height    | Conc.   | Units | Mark | Compound ID# | Compound Name |
|-------|----------|------------|-----------|---------|-------|------|--------------|---------------|
| 1     | 4.150    | 15538969.4 | 5656629.8 | 0.00000 | ppm   | SV   | 1            |               |
| 2     | 5.878    | 8310680.9  | 2478483.3 | 0.00000 |       | SV   |              |               |
| 3     | 6.882    | 41385.5    | 6637.0    | 0.00000 | ppm   | T    | 3            |               |
| 4     | 7.346    | 974436.3   | 509889.8  | 0.00000 | ppm   | SV   | 3            |               |
| 5     | 7.866    | 1841346.4  | 854824.8  | 0.00000 |       | V    |              |               |
| 6     | 11.412   | 65978.0    | 14293.5   | 0.00000 |       | SV   |              |               |
| 7     | 12.653   | 646657.1   | 248241.4  | 0.00000 |       | S    |              |               |

### L1 RT DMF K2CO3

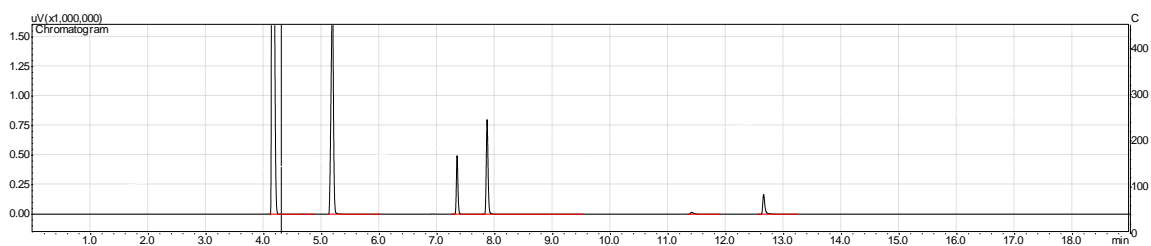

| Peak# | Ret.Time | Area       | Height    | Conc.   | Units | Mark | Compound ID# | Compound Name |
|-------|----------|------------|-----------|---------|-------|------|--------------|---------------|
| 1     | 4.149    | 16288686.3 | 5877196.7 | 0.00000 | ppm   | SV   | 1            |               |
| 2     | 5.187    | 5366605.4  | 1849458.3 | 0.00000 |       | SV   |              |               |
| 3     | 7.345    | 936001.4   | 488954.4  | 0.00000 | ppm   | SV   | 3            |               |
| 4     | 7.865    | 1735730.2  | 792983.6  | 0.00000 |       | SV   |              |               |
| 5     | 11.406   | 70474.5    | 16689.2   | 0.00000 |       | SV   |              |               |
| 6     | 12.653   | 455789.1   | 165775.8  | 0.00000 |       | SV   |              |               |

### L3 RT DMF K2CO3

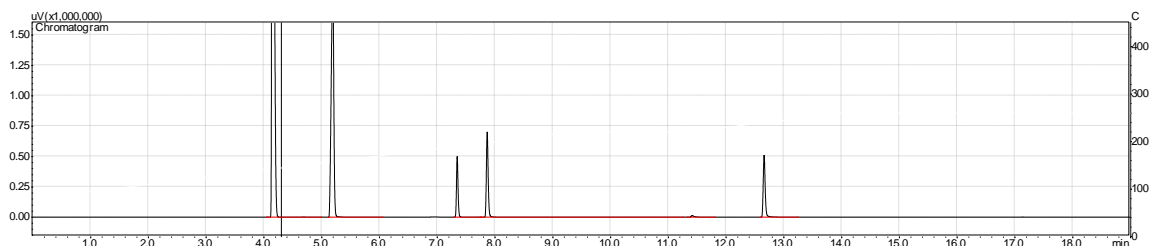

| Peak# | Ret.Time | Area | Height | Conc. | Units | Mark | Compound ID# | Compound Name |
|-------|----------|------|--------|-------|-------|------|--------------|---------------|
|-------|----------|------|--------|-------|-------|------|--------------|---------------|



|   |        |            |           |         |     |    |   |  |
|---|--------|------------|-----------|---------|-----|----|---|--|
| 1 | 4.150  | 15504551.6 | 5614423.4 | 0.00000 | ppm | SV | 1 |  |
| 2 | 5.191  | 6119656.0  | 2007372.9 | 0.00000 |     | S  |   |  |
| 3 | 7.345  | 941039.4   | 496730.6  | 0.00000 | ppm | SV | 3 |  |
| 4 | 7.864  | 1514023.0  | 688854.0  | 0.00000 |     | SV |   |  |
| 5 | 11.412 | 57446.4    | 13040.3   | 0.00000 |     | S  |   |  |
| 6 | 12.658 | 1227983.6  | 504578.1  | 0.00000 |     | SV |   |  |

L1 RT DIOXANE K2CO3

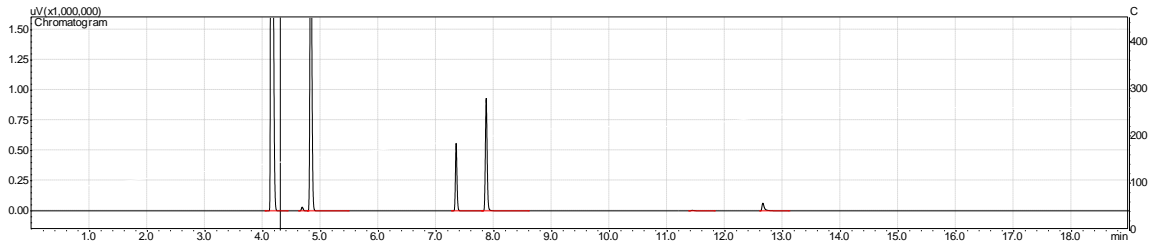

| Peak# | Ret.Time | Area       | Height    | Conc.   | Units | Mark | Compound ID# | Compound Name |
|-------|----------|------------|-----------|---------|-------|------|--------------|---------------|
| 1     | 4.148    | 16156130.7 | 5992274.9 | 0.00000 | ppm   | V    | 1            |               |
| 2     | 4.680    | 72075.9    | 32001.2   | 0.00000 |       |      |              |               |
| 3     | 4.829    | 6439221.5  | 2965025.8 | 0.00000 |       | SV   |              |               |
| 4     | 7.346    | 1046971.0  | 549634.2  | 0.00000 | ppm   | SV   | 3            |               |
| 5     | 7.866    | 2024032.8  | 927652.7  | 0.00000 |       | SV   |              |               |
| 6     | 11.435   | 25545.8    | 4930.3    | 0.00000 |       |      |              |               |
| 7     | 12.656   | 201077.0   | 63445.6   | 0.00000 |       | V    |              |               |

L3 RT DIOXANE K2CO3

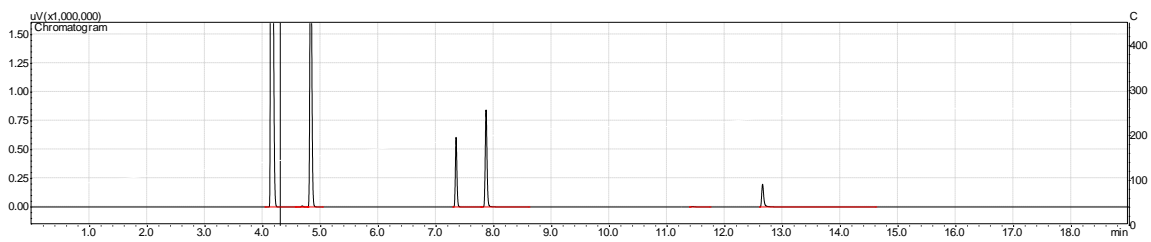

| Peak# | Ret.Time | Area       | Height    | Conc.   | Units | Mark | Compound ID# | Compound Name |
|-------|----------|------------|-----------|---------|-------|------|--------------|---------------|
| 1     | 4.147    | 16203865.4 | 6016681.6 | 0.00000 | ppm   | SV   | 1            |               |
| 2     | 4.681    | 22945.4    | 9870.5    | 0.00000 |       | T    |              |               |
| 3     | 4.829    | 6245004.6  | 2887544.1 | 0.00000 |       | V    |              |               |
| 4     | 7.346    | 1139371.2  | 595768.1  | 0.00000 | ppm   | SV   | 3            |               |
| 5     | 7.865    | 1826969.6  | 834562.2  | 0.00000 |       | SV   |              |               |
| 6     | 11.441   | 18214.0    | 3527.2    | 0.00000 |       | S    |              |               |
| 7     | 12.653   | 499122.6   | 196670.5  | 0.00000 |       | SV   |              |               |

### L1 RT DMA K3PO4

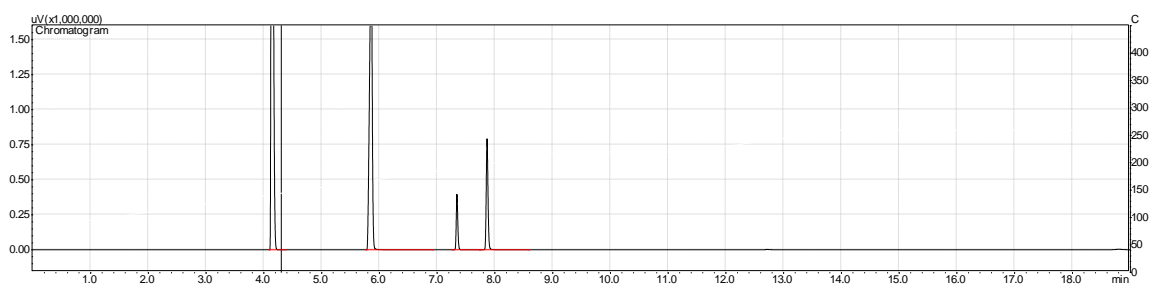

| Peak# | Ret.Time | Area       | Height    | Conc.   | Units | Mark | Compound ID# | Compound Name |
|-------|----------|------------|-----------|---------|-------|------|--------------|---------------|
| 1     | 4.138    | 13722717.1 | 5527632.7 | 0.00000 | ppm   | V    | 1            |               |
| 2     | 5.858    | 6999051.8  | 2188345.5 | 0.00000 |       | S    |              |               |
| 3     | 7.343    | 736928.5   | 393903.6  | 0.00000 | ppm   | S    | 3            |               |
| 4     | 7.864    | 1693252.2  | 781781.7  | 0.00000 |       | SV   |              |               |

### L3 RT DMA K3PO4

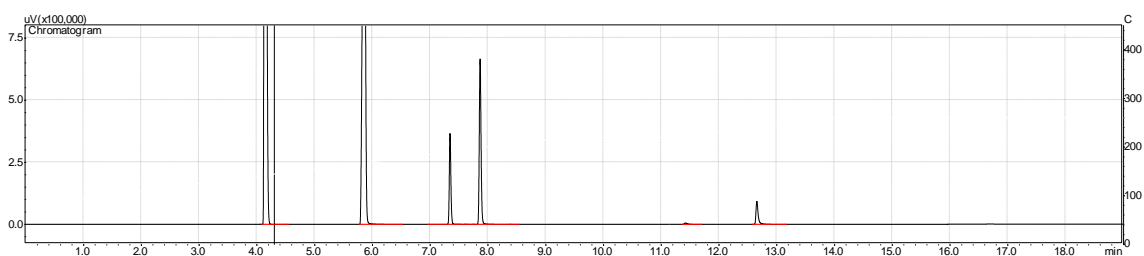

| Peak# | Ret.Time | Area       | Height    | Conc.   | Units | Mark | Compound ID# | Compound Name |
|-------|----------|------------|-----------|---------|-------|------|--------------|---------------|
| 1     | 4.138    | 13050133.0 | 5333303.6 | 0.00000 | ppm   | SV   | 1            |               |
| 2     | 5.860    | 7158175.1  | 2228700.8 | 0.00000 |       | S    |              |               |
| 3     | 7.343    | 694975.5   | 363631.3  | 0.00000 | ppm   | S    | 3            |               |
| 4     | 7.864    | 1412630.5  | 654243.6  | 0.00000 |       | SV   |              |               |
| 5     | 11.419   | 22664.8    | 5485.2    | 0.00000 |       |      |              |               |
| 6     | 12.655   | 250317.4   | 91900.2   | 0.00000 |       |      |              |               |

### L1 RT DMF K3PO4

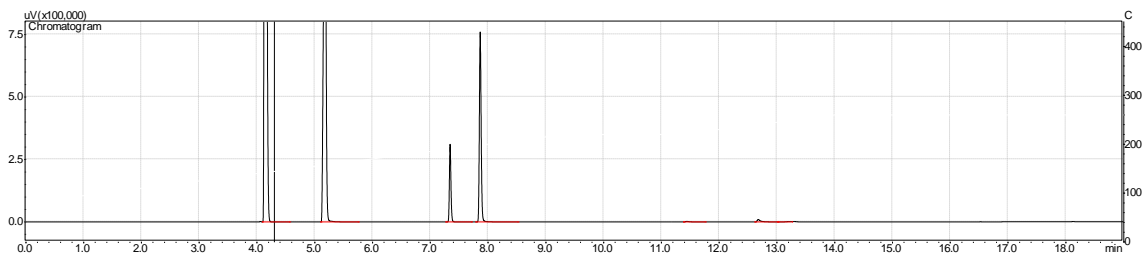

| Peak# | Ret.Time | Area | Height | Conc. | Units | Mark | Compound ID# | Compound Name |
|-------|----------|------|--------|-------|-------|------|--------------|---------------|
|-------|----------|------|--------|-------|-------|------|--------------|---------------|

|   |        |            |           |         |     |    |   |  |
|---|--------|------------|-----------|---------|-----|----|---|--|
| 1 | 4.138  | 13706364.3 | 5509237.4 | 0.00000 | ppm | SV | 1 |  |
| 2 | 5.177  | 5136249.9  | 1785497.7 | 0.00000 |     | S  |   |  |
| 3 | 7.343  | 578980.3   | 308609.3  | 0.00000 | ppm | S  | 3 |  |
| 4 | 7.864  | 1624660.8  | 747303.9  | 0.00000 |     | S  |   |  |
| 5 | 11.441 | 11602.1    | 2223.9    | 0.00000 |     |    |   |  |
| 6 | 12.676 | 41076.6    | 9649.2    | 0.00000 |     | V  |   |  |
| 7 | 13.237 | 11026.5    | 1652.9    | 0.00000 |     | V  |   |  |

L3 RT DMF K3PO4

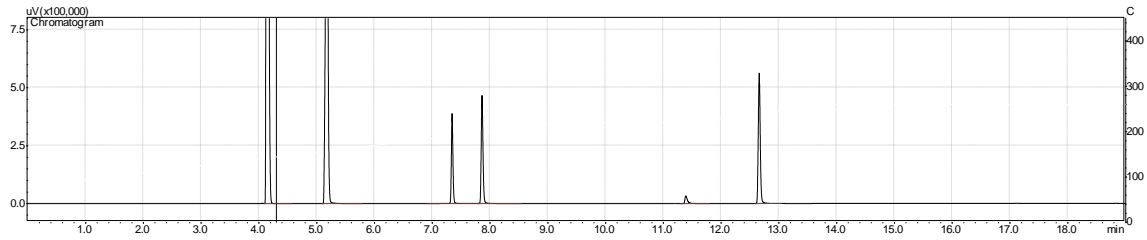

| Peak# | Ret.Time | Area       | Height    | Conc.   | Units | Mark | Compound ID# | Compound Name |
|-------|----------|------------|-----------|---------|-------|------|--------------|---------------|
| 1     | 4.138    | 13033785.5 | 5329082.0 | 0.00000 | ppm   | SV   | 1            |               |
| 2     | 5.177    | 5293679.0  | 1822547.1 | 0.00000 |       |      |              |               |
| 3     | 7.343    | 759216.4   | 384961.0  | 0.00000 | ppm   | S    | 3            |               |
| 4     | 7.861    | 1003392.5  | 463590.7  | 0.00000 |       | SV   |              |               |
| 5     | 11.390   | 106382.7   | 33458.6   | 0.00000 |       |      |              |               |
| 6     | 12.659   | 1338478.0  | 560051.0  | 0.00000 |       |      |              |               |

L1 RT DMA KOH

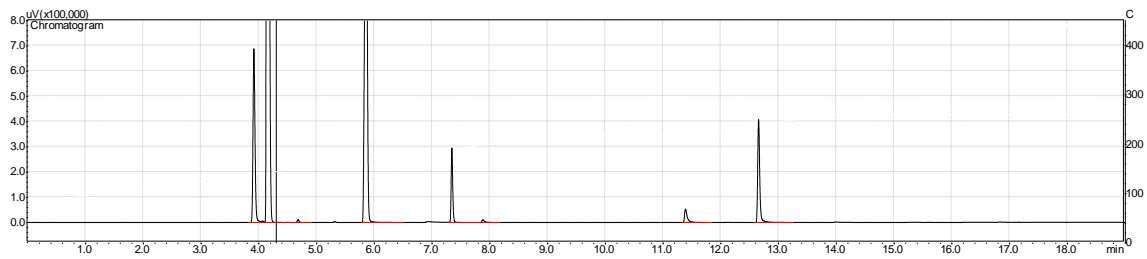

| Peak# | Ret.Time | Area       | Height    | Conc.   | Units | Mark | Compound ID# | Compound Name |
|-------|----------|------------|-----------|---------|-------|------|--------------|---------------|
| 1     | 3.914    | 1668829.8  | 685238.7  | 0.00000 |       | SV   |              |               |
| 2     | 4.145    | 15415119.3 | 5765699.6 | 0.00000 | ppm   | SV   | 1            |               |
| 3     | 5.859    | 5489125.7  | 1879928.6 | 0.00000 |       | S    |              |               |
| 4     | 7.342    | 559124.3   | 291300.2  | 0.00000 | ppm   | SV   | 3            |               |
| 5     | 11.387   | 181300.5   | 52830.0   | 0.00000 |       |      |              |               |

|   |        |          |          |         |  |   |  |  |
|---|--------|----------|----------|---------|--|---|--|--|
| 6 | 12.654 | 997841.2 | 405444.0 | 0.00000 |  | S |  |  |
|---|--------|----------|----------|---------|--|---|--|--|

L3 RT DMA KOH

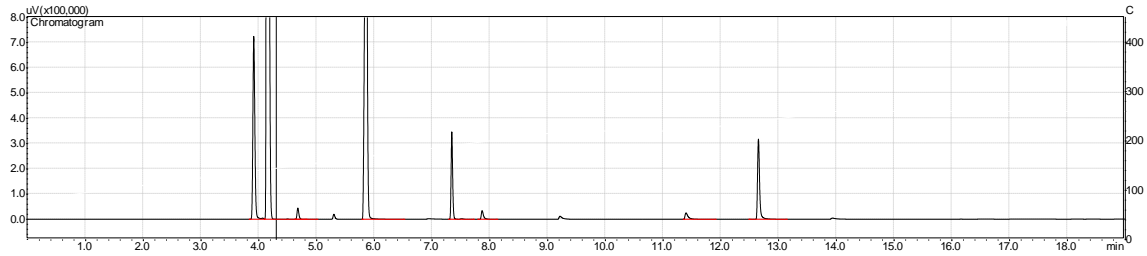

| Peak# | Ret.Time | Area       | Height    | Conc.   | Units | Mark | Compound ID# | Compound Name |
|-------|----------|------------|-----------|---------|-------|------|--------------|---------------|
| 1     | 3.912    | 1718711.0  | 715597.0  | 0.00000 |       | SV   |              |               |
| 2     | 4.144    | 14261447.4 | 5513068.5 | 0.00000 | ppm   | SV   | 1            |               |
| 3     | 4.675    | 100018.2   | 44823.0   | 0.00000 |       | T    |              |               |
| 4     | 5.858    | 5421448.3  | 1851105.7 | 0.00000 |       | S    |              |               |
| 5     | 7.341    | 651029.8   | 340165.7  | 0.00000 | ppm   | SV   | 3            |               |
| 6     | 7.866    | 93124.4    | 34326.9   | 0.00000 |       |      |              |               |
| 7     | 11.397   | 102777.8   | 25363.0   | 0.00000 |       |      |              |               |
| 8     | 12.651   | 789138.6   | 316462.3  | 0.00000 |       |      |              |               |

L1 RT DMF KOH

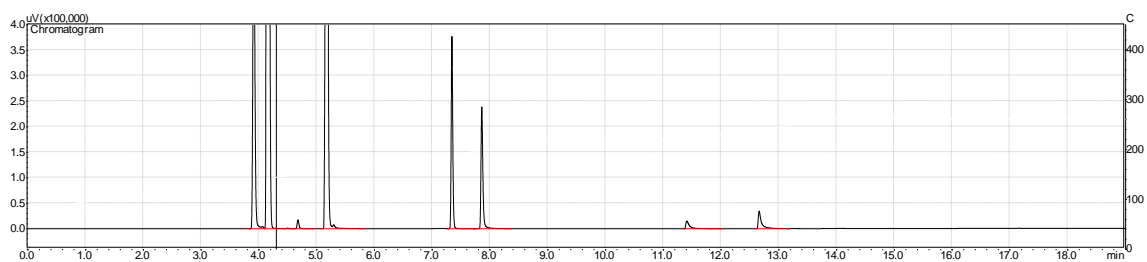

| Peak# | Ret.Time | Area       | Height    | Conc.   | Units | Mark | Compound ID# | Compound Name |
|-------|----------|------------|-----------|---------|-------|------|--------------|---------------|
| 1     | 3.910    | 1695872.9  | 719179.2  | 0.00000 |       | SV   |              |               |
| 2     | 4.143    | 13039676.3 | 5176624.1 | 0.00000 | ppm   | SV   | 1            |               |
| 3     | 5.175    | 4179208.3  | 1544733.6 | 0.00000 |       | S    |              |               |

|   |        |          |          |         |     |    |   |  |
|---|--------|----------|----------|---------|-----|----|---|--|
| 4 | 7.341  | 705526.9 | 369123.4 | 0.00000 | ppm | SV | 3 |  |
| 5 | 7.858  | 544396.3 | 237337.5 | 0.00000 |     |    |   |  |
| 6 | 11.408 | 69719.2  | 15254.2  | 0.00000 |     | SV |   |  |
| 7 | 12.660 | 137244.2 | 34377.9  | 0.00000 |     | V  |   |  |

### L3 RT DMF KOH

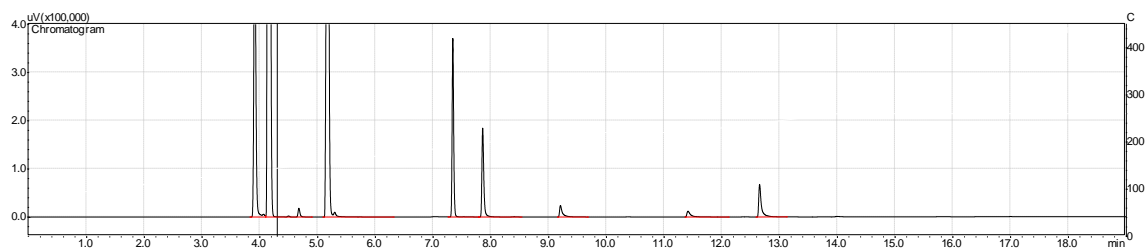

| Peak# | Ret.Time | Area       | Height    | Conc.   | Units | Mark | Compound ID# | Compound Name |
|-------|----------|------------|-----------|---------|-------|------|--------------|---------------|
| 1     | 3.911    | 1613042.5  | 675118.7  | 0.00000 |       | SV   |              |               |
| 2     | 4.144    | 13446996.1 | 5296670.0 | 0.00000 | ppm   | SV   | 1            |               |
| 3     | 5.175    | 4095356.1  | 1522510.6 | 0.00000 |       | S    |              |               |
| 4     | 7.341    | 694788.4   | 361299.7  | 0.00000 | ppm   | SV   | 3            |               |
| 5     | 7.858    | 421928.5   | 182947.8  | 0.00000 |       | SV   |              |               |
| 6     | 9.205    | 85914.2    | 23871.1   | 0.00000 | ppm   | SV   | 5            |               |
| 7     | 11.413   | 58915.1    | 12159.6   | 0.00000 |       | SV   |              |               |
| 8     | 12.654   | 215359.4   | 67085.3   | 0.00000 |       |      |              |               |

### Room temperature substrate screening

4-Methoxy-biphenyl

Ar\_Br\_1\_RT\_To

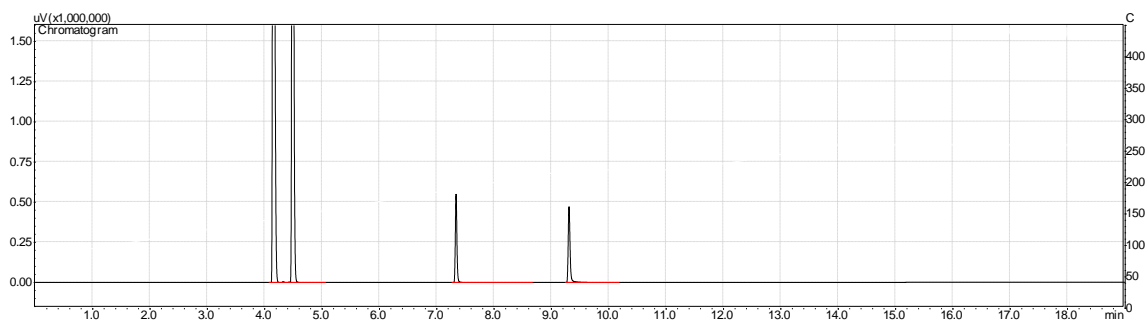

| Peak# | Ret.Time | Area       | Height    | Conc.   | Units | Mark | Compound ID# | Compound Name |
|-------|----------|------------|-----------|---------|-------|------|--------------|---------------|
| 1     | 4.149    | 12798233.3 | 5286538.8 | 0.00000 | ppm   | SV   | 1            |               |
| 2     | 4.485    | 12196844.3 | 5776622.4 | 0.00000 | ppm   | V    | 1            |               |
| 3     | 7.336    | 1053454.2  | 542515.1  | 0.00000 | ppm   | SV   | 3            |               |
| 4     | 9.306    | 1103305.7  | 465699.3  | 0.00000 | ppm   |      | 5            |               |

L1\_Ar\_Br\_1\_RT\_12H:

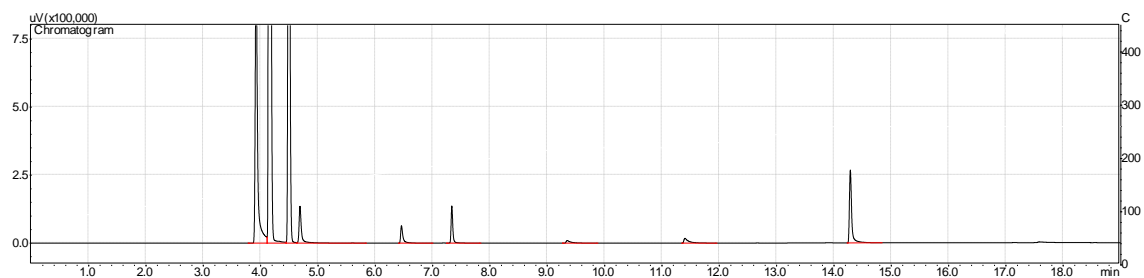

| Peak# | Ret.Time | Area       | Height    | Conc.   | Units | Mark | Compound ID# | Compound Name |
|-------|----------|------------|-----------|---------|-------|------|--------------|---------------|
| 1     | 3.920    | 2936038.3  | 1026098.7 | 0.00000 |       |      |              |               |
| 2     | 4.149    | 13127892.5 | 5318978.7 | 0.00000 | ppm   | SV   | 1            |               |
| 3     | 4.490    | 6773409.9  | 3250833.1 | 0.00000 | ppm   | V    | 1            |               |
| 4     | 4.686    | 417478.0   | 134353.6  | 0.00000 |       | SV   |              |               |
| 5     | 6.456    | 84461.2    | 63794.7   | 0.00000 | ppm   |      | 2            |               |
| 6     | 7.334    | 287321.2   | 136169.9  | 0.00000 | ppm   | V    | 3            |               |
| 7     | 9.348    | 37217.8    | 9520.0    | 0.00000 | ppm   |      | 5            |               |
| 8     | 11.401   | 104817.0   | 17622.5   | 0.00000 |       | V    |              |               |
| 9     | 14.285   | 742659.5   | 263896.4  | 0.00000 | ppm   |      | 6            |               |

L3\_Ar\_Br\_1\_RT\_12H:

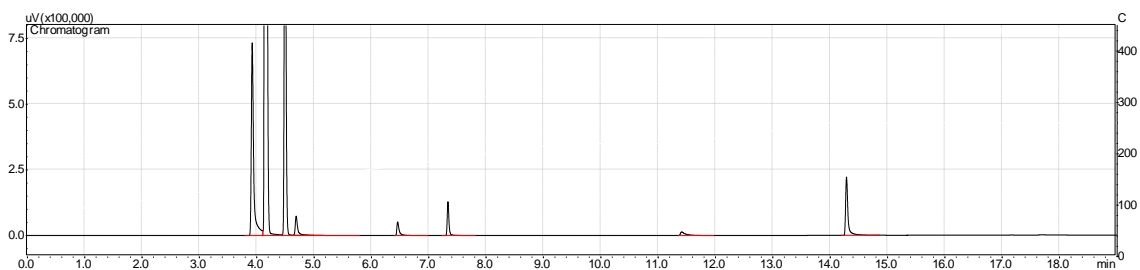

| Peak# | Ret.Time | Area       | Height    | Conc.   | Units | Mark | Compound ID# | Compound Name |
|-------|----------|------------|-----------|---------|-------|------|--------------|---------------|
| 1     | 3.921    | 2086796.3  | 727118.4  | 0.00000 |       |      |              |               |
| 2     | 4.147    | 15126787.6 | 5976183.5 | 0.00000 | ppm   | V    | 1            |               |
| 3     | 4.493    | 3706066.9  | 1768612.0 | 0.00000 | ppm   | SV   | 1            |               |
| 4     | 4.688    | 217447.1   | 72808.7   | 0.00000 |       | T    |              |               |
| 5     | 6.458    | 156224.8   | 51694.9   | 0.00000 | ppm   |      | 2            |               |
| 6     | 7.334    | 275518.4   | 128572.1  | 0.00000 | ppm   | V    | 3            |               |
| 7     | 11.410   | 89890.8    | 14133.6   | 0.00000 |       |      |              |               |
| 8     | 14.285   | 633543.8   | 219038.7  | 0.00000 | ppm   |      | 6            |               |

CyJohnPhos\_Ar\_Br\_1\_RT\_12H:

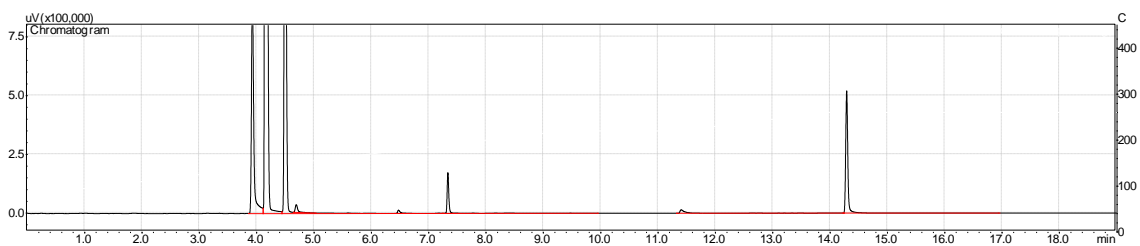

| Peak# | Ret.Time | Area       | Height    | Conc.   | Units | Mark | Compound ID# | Compound Name |
|-------|----------|------------|-----------|---------|-------|------|--------------|---------------|
| 1     | 3.925    | 2608259.1  | 917695.5  | 0.00000 |       | V    |              |               |
| 2     | 4.152    | 20006847.1 | 7756672.9 | 0.00000 | ppm   | V    | 1            |               |
| 3     | 4.495    | 6536418.1  | 2844949.3 | 0.00000 | ppm   | SV   | 1            |               |
| 4     | 4.690    | 105829.6   | 32858.9   | 0.00000 |       | T    |              |               |
| 5     | 6.473    | 57070.0    | 14825.2   | 0.00000 | ppm   | T    | 2            |               |
| 6     | 7.334    | 358824.2   | 173236.8  | 0.00000 | ppm   | TV   | 3            |               |
| 7     | 11.403   | 74028.7    | 15619.8   | 0.00000 |       | SV   |              |               |
| 8     | 14.289   | 1360420.9  | 516776.1  | 0.00000 | ppm   | SV   | 6            |               |

JohnPhos\_Ar\_Br\_1\_RT\_12H:

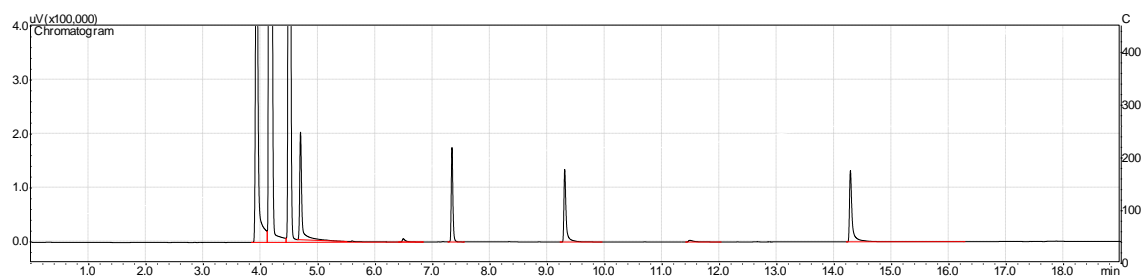

| Peak# | Ret.Time | Area       | Height    | Conc.   | Units | Mark | Compound ID# | Compound Name |
|-------|----------|------------|-----------|---------|-------|------|--------------|---------------|
| 1     | 3.926    | 2416539.2  | 845193.4  | 0.00000 |       |      |              |               |
| 2     | 4.153    | 17974753.1 | 6881425.8 | 0.00000 | ppm   | V    | 1            |               |
| 3     | 4.495    | 6824195.5  | 2934644.4 | 0.00000 | ppm   | SV   | 1            |               |
| 4     | 4.693    | 546079.4   | 198386.3  | 0.00000 |       | T    |              |               |
| 5     | 6.486    | 29303.3    | 6542.1    | 0.00000 | ppm   | TV   | 2            |               |
| 6     | 7.334    | 350723.1   | 174385.6  | 0.00000 | ppm   | V    | 3            |               |
| 7     | 9.300    | 372700.9   | 134090.8  | 0.00000 | ppm   | SV   | 5            |               |
| 8     | 11.482   | 28130.7    | 3460.5    | 0.00000 |       | S    |              |               |
| 9     | 14.282   | 440958.3   | 131369.1  | 0.00000 | ppm   | SV   | 6            |               |

3,5-Dimethyl-1,1'-biphenyl

Ar\_Br\_2\_RT\_To

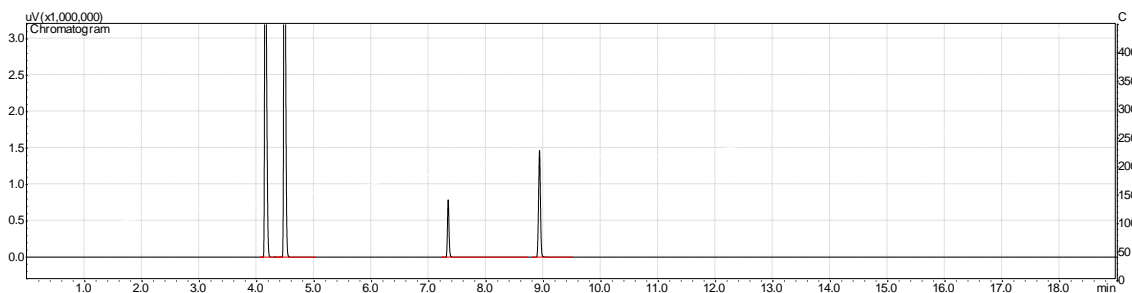

| Peak# | Ret.Time | Area       | Height    | Conc.   | Units | Mark | Compound ID# | Compound Name |
|-------|----------|------------|-----------|---------|-------|------|--------------|---------------|
| 1     | 4.149    | 12083239.4 | 5028464.4 | 0.00000 | ppm   | SV   | 1            |               |
| 2     | 4.483    | 14497131.7 | 6812399.3 | 0.00000 | ppm   | V    | 1            |               |
| 3     | 7.337    | 1500159.6  | 771529.8  | 0.00000 | ppm   | SV   | 3            |               |
| 4     | 8.930    | 3393013.0  | 1456478.6 | 0.00000 |       |      |              |               |

L1\_Ar\_Br\_2\_RT\_12H:



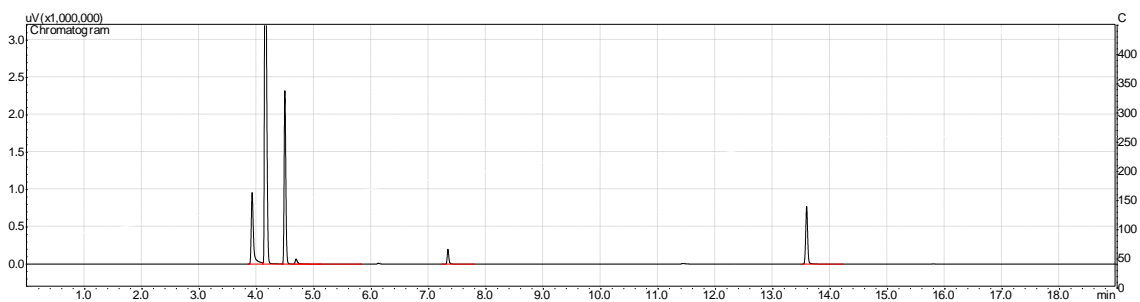

| Peak# | Ret.Time | Area       | Height    | Conc.   | Units | Mark | Compound ID# | Compound Name |
|-------|----------|------------|-----------|---------|-------|------|--------------|---------------|
| 1     | 3.920    | 2674872.9  | 954795.1  | 0.00000 |       | V    |              |               |
| 2     | 4.148    | 13405195.1 | 5436174.9 | 0.00000 | ppm   | V    | 1            |               |
| 3     | 4.491    | 4807114.5  | 2291566.8 | 0.00000 | ppm   | SV   | 1            |               |
| 4     | 4.686    | 203601.8   | 64463.4   | 0.00000 |       | T    |              |               |
| 5     | 7.334    | 404573.7   | 198436.4  | 0.00000 | ppm   | V    | 3            |               |
| 6     | 13.590   | 1853648.4  | 765044.6  | 0.00000 |       | S    |              |               |

L3\_Ar\_Br\_2\_RT\_12H:

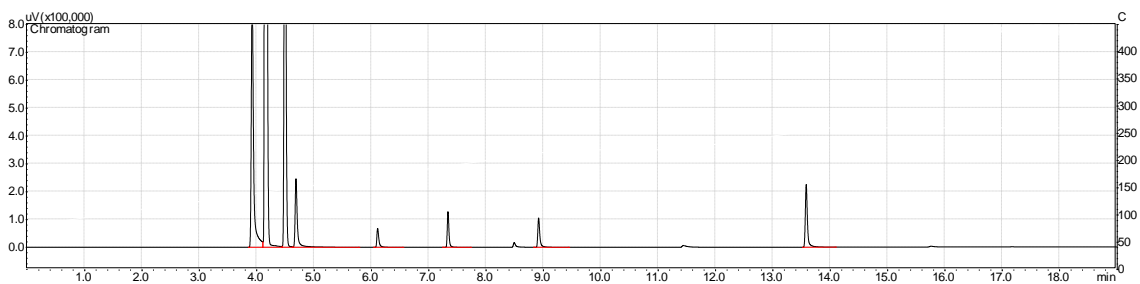

| Peak# | Ret.Time | Area       | Height    | Conc.   | Units | Mark | Compound ID# | Compound Name |
|-------|----------|------------|-----------|---------|-------|------|--------------|---------------|
| 1     | 3.920    | 2550991.1  | 904724.6  | 0.00000 |       | V    |              |               |
| 2     | 4.149    | 13190995.1 | 5356703.0 | 0.00000 | ppm   | V    | 1            |               |
| 3     | 4.491    | 4963602.5  | 2394041.9 | 0.00000 | ppm   | V    | 1            |               |
| 4     | 4.684    | 702707.5   | 245541.5  | 0.00000 |       | SV   |              |               |
| 5     | 6.108    | 101881.3   | 67990.2   | 0.00000 |       | S    |              |               |
| 6     | 7.335    | 266162.4   | 127388.3  | 0.00000 | ppm   | V    | 3            |               |
| 7     | 8.915    | 454780.2   | 104323.8  | 0.00000 |       | SV   |              |               |
| 8     | 13.581   | 585572.0   | 221461.4  | 0.00000 |       |      |              |               |

PPh3\_Ar\_Br\_2\_RT\_12H:

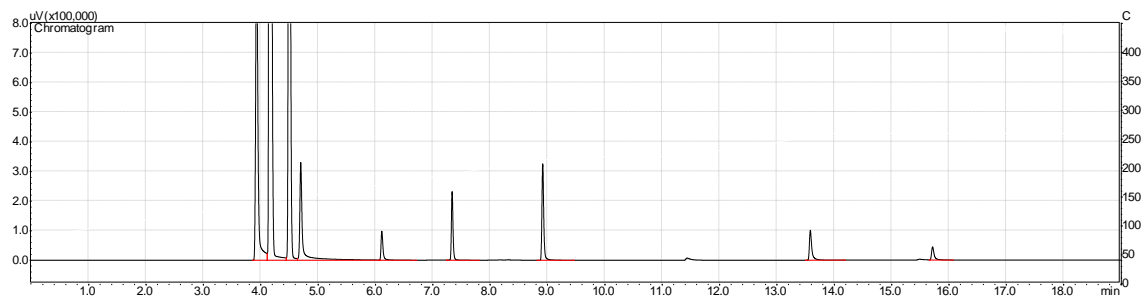

| Peak# | Ret.Time | Area       | Height    | Conc.   | Units | Mark | Compound ID# | Compound Name |
|-------|----------|------------|-----------|---------|-------|------|--------------|---------------|
| 1     | 3.928    | 3030547.0  | 1057558.7 | 0.00000 |       | V    |              |               |
| 2     | 4.155    | 16501085.4 | 6183956.7 | 0.00000 | ppm   | V    | 1            |               |
| 3     | 4.496    | 7168854.6  | 3180089.4 | 0.00000 | ppm   | V    | 1            |               |
| 4     | 4.697    | 1167706.1  | 328433.7  | 0.00000 |       | SV   |              |               |
| 5     | 6.110    | 244536.6   | 97050.9   | 0.00000 |       | SV   |              |               |
| 6     | 7.336    | 459707.1   | 229393.4  | 0.00000 | ppm   | SV   | 3            |               |
| 7     | 8.916    | 727099.2   | 323849.4  | 0.00000 |       |      |              |               |
| 8     | 13.582   | 302904.3   | 100552.6  | 0.00000 |       | S    |              |               |
| 9     | 15.713   | 146021.4   | 44218.7   | 0.00000 | ppm   | V    | 6            |               |

CyJohnPhos\_Ar\_Br\_2\_RT\_12H:

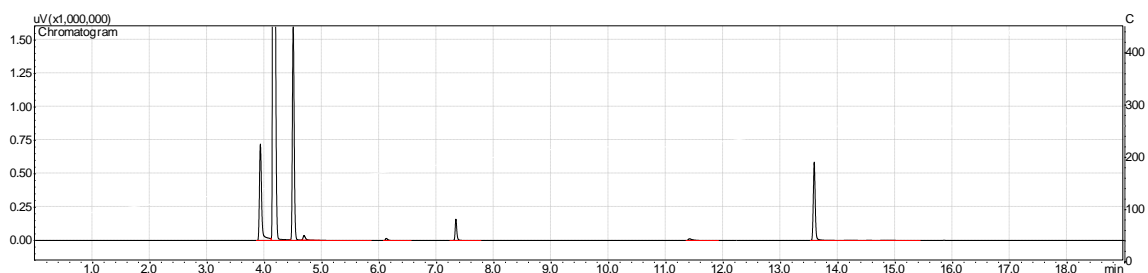

| Peak# | Ret.Time | Area       | Height    | Conc.   | Units | Mark | Compound ID# | Compound Name |
|-------|----------|------------|-----------|---------|-------|------|--------------|---------------|
| 1     | 3.925    | 1968250.9  | 717269.4  | 0.00000 |       |      |              |               |
| 2     | 4.152    | 18199956.5 | 6881091.7 | 0.00000 | ppm   | V    | 1            |               |
| 3     | 4.498    | 3632886.2  | 1607024.6 | 0.00000 | ppm   | SV   | 1            |               |
| 4     | 4.687    | 100071.7   | 34169.3   | 0.00000 |       | T    |              |               |
| 5     | 6.121    | 50513.1    | 16705.7   | 0.00000 |       |      |              |               |
| 6     | 7.335    | 328422.3   | 158380.9  | 0.00000 | ppm   | V    | 3            |               |
| 7     | 11.410   | 77853.2    | 13453.6   | 0.00000 |       |      |              |               |
| 8     | 13.585   | 1420908.8  | 579071.0  | 0.00000 |       | SV   |              |               |

JohnPhos\_Ar\_Br\_2\_RT\_12H:

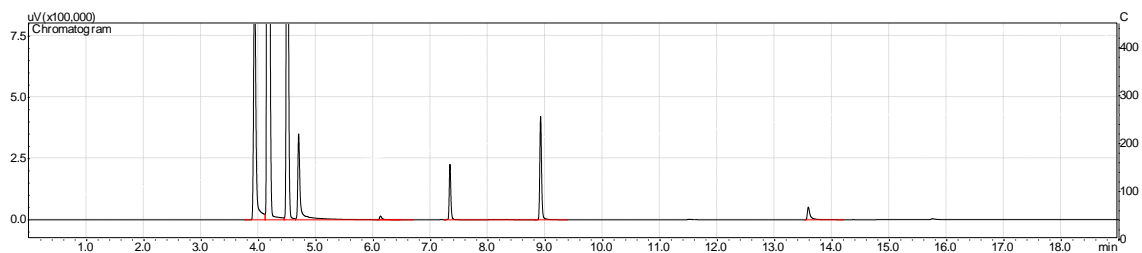

| Peak# | Ret.Time | Area       | Height    | Conc.   | Units | Mark | Compound ID# | Compound Name |
|-------|----------|------------|-----------|---------|-------|------|--------------|---------------|
| 1     | 3.928    | 2928920.9  | 1014625.4 | 0.00000 |       |      |              |               |
| 2     | 4.154    | 17532575.0 | 6480499.3 | 0.00000 | ppm   | V    | 1            |               |
| 3     | 4.498    | 5836239.4  | 2581508.1 | 0.00000 | ppm   | V    | 1            |               |
| 4     | 4.697    | 1218075.3  | 349182.3  | 0.00000 |       | SV   |              |               |
| 5     | 6.123    | 47660.1    | 15181.1   | 0.00000 |       | T    |              |               |
| 6     | 7.336    | 450128.3   | 223744.8  | 0.00000 | ppm   | SV   | 3            |               |
| 7     | 8.917    | 927969.9   | 420877.7  | 0.00000 |       |      |              |               |
| 8     | 13.586   | 187993.0   | 51902.7   | 0.00000 |       |      |              |               |

### 3-Methyl-biphenyl

Ar\_Br\_3\_RT\_To

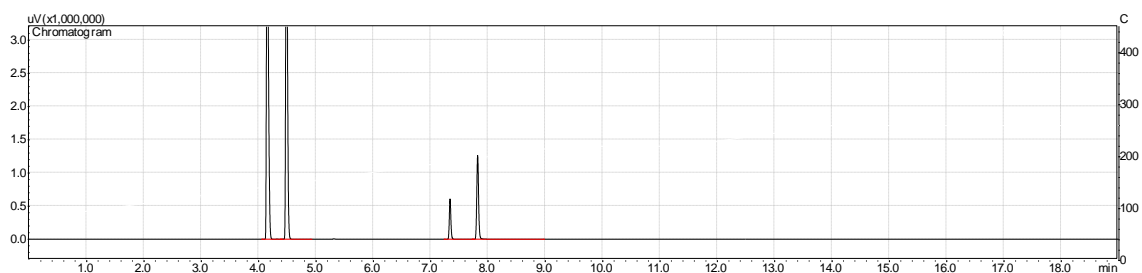

| Peak# | Ret.Time | Area       | Height    | Conc.   | Units | Mark | Compound ID# | Compound Name |
|-------|----------|------------|-----------|---------|-------|------|--------------|---------------|
| 1     | 4.148    | 12508966.0 | 5204094.2 | 0.00000 | ppm   | SV   | 1            |               |
| 2     | 4.484    | 12561854.5 | 5981187.9 | 0.00000 | ppm   | V    | 1            |               |
| 3     | 7.337    | 1152613.7  | 596712.8  | 0.00000 | ppm   | SV   | 3            |               |
| 4     | 7.819    | 2797176.3  | 1251694.9 | 0.00000 |       | SV   |              |               |

L1\_Ar\_Br\_3\_RT\_12H:

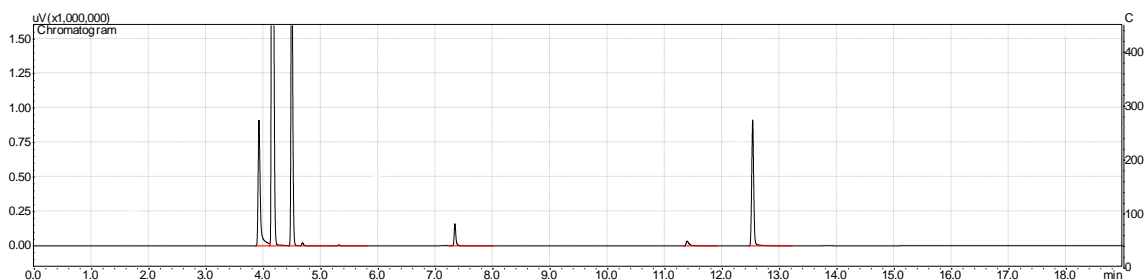

| Peak# | Ret.Time | Area       | Height    | Conc.   | Units | Mark | Compound ID# | Compound Name |
|-------|----------|------------|-----------|---------|-------|------|--------------|---------------|
| 1     | 3.918    | 2489593.5  | 908256.8  | 0.00000 |       | V    |              |               |
| 2     | 4.147    | 13187189.2 | 5378284.2 | 0.00000 | ppm   | SV   | 1            |               |
| 3     | 4.490    | 5061647.5  | 2427317.2 | 0.00000 | ppm   | SV   | 1            |               |
| 4     | 7.335    | 356604.0   | 159847.7  | 0.00000 | ppm   | SV   | 3            |               |
| 5     | 11.385   | 139697.7   | 35741.5   | 0.00000 |       | S    |              |               |
| 6     | 12.529   | 2252119.0  | 908782.0  | 0.00000 |       | S    |              |               |

L3\_Ar\_Br\_3\_RT\_12H:

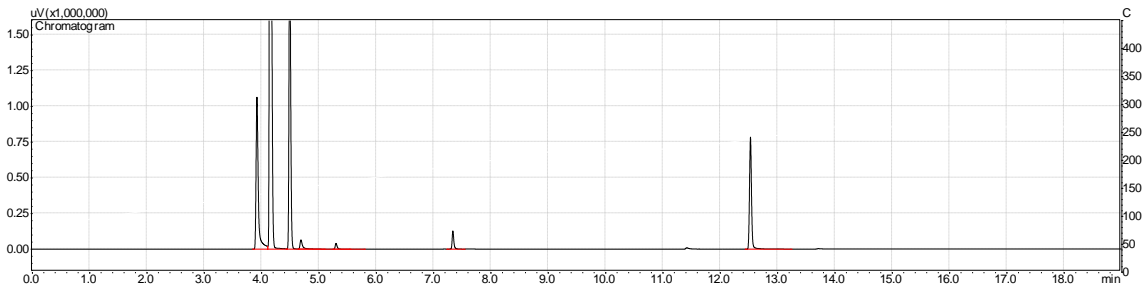

| Peak# | Ret.Time | Area       | Height    | Conc.   | Units | Mark | Compound ID# | Compound Name |
|-------|----------|------------|-----------|---------|-------|------|--------------|---------------|
| 1     | 3.918    | 2905603.2  | 1059644.3 | 0.00000 |       | V    |              |               |
| 2     | 4.148    | 12809088.7 | 5245219.6 | 0.00000 | ppm   | V    | 1            |               |
| 3     | 4.490    | 4595002.3  | 2186214.8 | 0.00000 | ppm   | SV   | 1            |               |
| 4     | 4.685    | 200968.1   | 63268.7   | 0.00000 |       | T    |              |               |
| 5     | 5.297    | 77144.3    | 40477.7   | 0.00000 |       | T    |              |               |
| 6     | 7.335    | 272061.6   | 126858.1  | 0.00000 | ppm   | V    | 3            |               |
| 7     | 12.526   | 1930096.7  | 773000.6  | 0.00000 |       | S    |              |               |

CyJohnPhos\_Ar\_Br\_3\_RT\_12H:

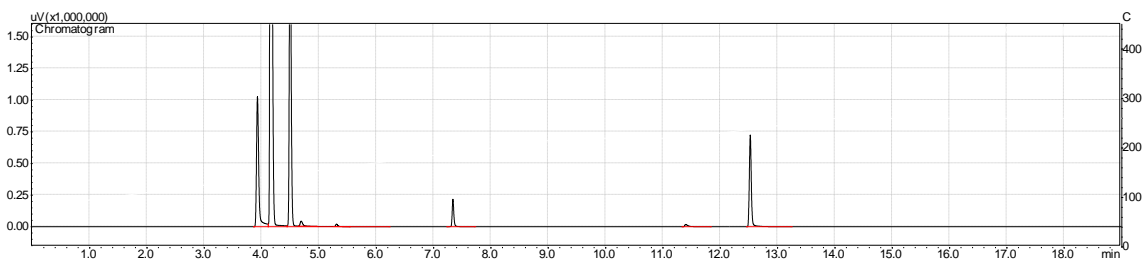

| Peak# | Ret.Time | Area       | Height    | Conc.   | Units | Mark | Compound ID# | Compound Name |
|-------|----------|------------|-----------|---------|-------|------|--------------|---------------|
| 1     | 3.927    | 2844176.7  | 1021498.6 | 0.00000 |       | V    |              |               |
| 2     | 4.157    | 14939673.0 | 5743196.4 | 0.00000 | ppm   | V    | 1            |               |
| 3     | 4.497    | 5962750.6  | 2620227.9 | 0.00000 | ppm   | SV   | 1            |               |
| 4     | 4.690    | 125838.8   | 39676.6   | 0.00000 |       | T    |              |               |
| 5     | 5.306    | 53019.2    | 20245.9   | 0.00000 |       | T    |              |               |

|   |        |           |          |         |     |   |   |  |
|---|--------|-----------|----------|---------|-----|---|---|--|
| 6 | 7.336  | 439061.3  | 215360.1 | 0.00000 | ppm | V | 3 |  |
| 7 | 11.398 | 78826.4   | 18130.1  | 0.00000 |     | S |   |  |
| 8 | 12.523 | 1775952.8 | 721435.5 | 0.00000 |     | S |   |  |

JohnPhos\_Ar\_Br\_3\_RT\_12H:

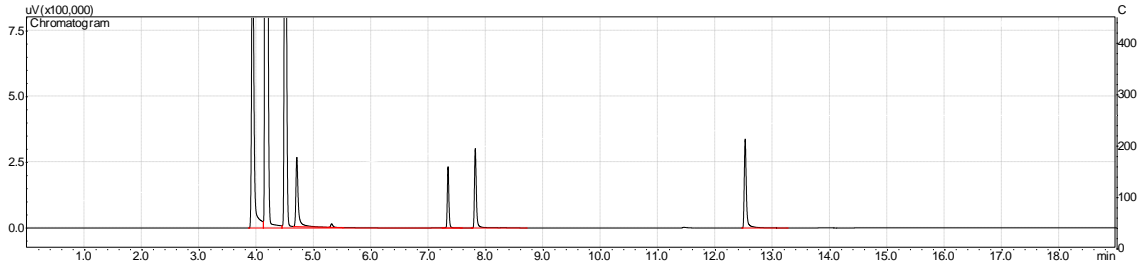

| Peak# | Ret.Time | Area       | Height    | Conc.   | Units | Mark | Compound ID# | Compound Name |
|-------|----------|------------|-----------|---------|-------|------|--------------|---------------|
| 1     | 3.928    | 3439155.9  | 1194170.4 | 0.00000 |       | V    |              |               |
| 2     | 4.156    | 16240344.2 | 6070235.3 | 0.00000 | ppm   | V    | 1            |               |
| 3     | 4.497    | 6742841.7  | 2852420.9 | 0.00000 | ppm   | SV   | 1            |               |
| 4     | 4.699    | 759046.1   | 261158.7  | 0.00000 |       | T    |              |               |
| 5     | 5.307    | 35686.6    | 13466.5   | 0.00000 |       | T    |              |               |
| 6     | 7.336    | 452285.1   | 229778.3  | 0.00000 | ppm   | TV   | 3            |               |
| 7     | 7.811    | 1359058.6  | 300265.8  | 0.00000 |       | SV   |              |               |
| 8     | 12.518   | 886056.7   | 336718.5  | 0.00000 |       |      |              |               |

2,4-Dimethyl-1,1'-biphenyl

Ar\_Br\_4\_RT\_To

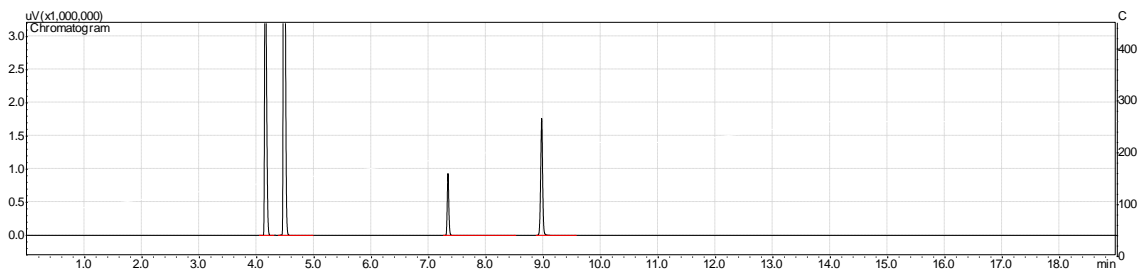

| Peak# | Ret.Time | Area       | Height    | Conc.   | Units | Mark | Compound ID# | Compound Name |
|-------|----------|------------|-----------|---------|-------|------|--------------|---------------|
| 1     | 4.149    | 10376768.1 | 4437065.4 | 0.00000 | ppm   | V    | 1            |               |
| 2     | 4.475    | 19922481.6 | 9076037.2 | 0.00000 | ppm   | V    | 1            |               |
| 3     | 7.334    | 1774688.2  | 927456.9  | 0.00000 | ppm   | SV   | 3            |               |
| 4     | 8.968    | 4232201.0  | 1759051.1 | 0.00000 |       | V    |              |               |

L1\_Ar\_Br\_4\_RT\_12H:

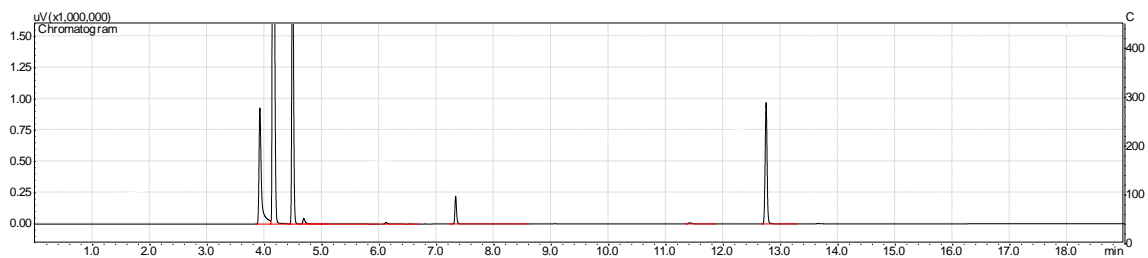

| Peak# | Ret.Time | Area       | Height    | Conc.   | Units | Mark | Compound ID# | Compound Name |
|-------|----------|------------|-----------|---------|-------|------|--------------|---------------|
| 1     | 3.916    | 2776210.7  | 918830.3  | 0.00000 |       | V    |              |               |
| 2     | 4.146    | 12285980.9 | 5076474.7 | 0.00000 | ppm   | V    | 1            |               |
| 3     | 4.486    | 5333404.8  | 2572563.9 | 0.00000 | ppm   | SV   | 1            |               |
| 4     | 4.682    | 149082.4   | 44566.3   | 0.00000 |       | T    |              |               |
| 5     | 6.115    | 46158.4    | 14632.5   | 0.00000 |       | S    |              |               |
| 6     | 7.330    | 452824.4   | 223505.0  | 0.00000 | ppm   | SV   | 3            |               |
| 7     | 11.411   | 55451.0    | 10655.7   | 0.00000 |       |      |              |               |
| 8     | 12.746   | 2307149.3  | 956916.8  | 0.00000 |       | SV   |              |               |

L3\_Ar\_Br\_4\_RT\_12H:

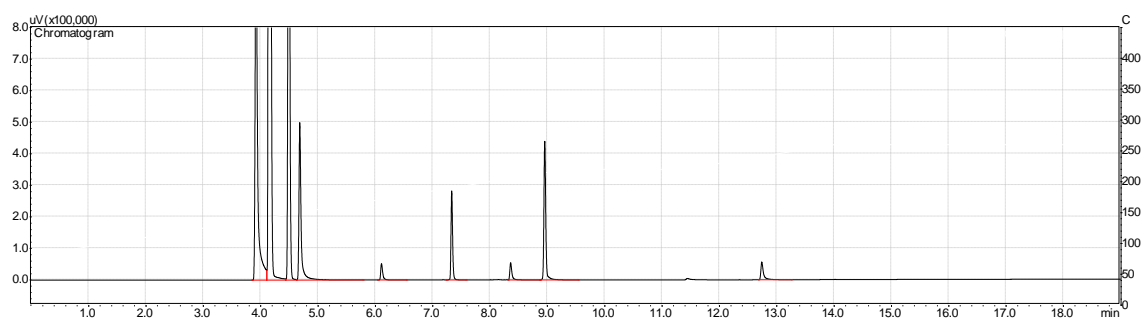

| Peak# | Ret.Time | Area       | Height    | Conc.   | Units | Mark | Compound ID# | Compound Name |
|-------|----------|------------|-----------|---------|-------|------|--------------|---------------|
| 1     | 3.918    | 3443175.4  | 1152427.4 | 0.00000 |       | V    |              |               |
| 2     | 4.146    | 13918371.0 | 5548981.5 | 0.00000 | ppm   | V    | 1            |               |
| 3     | 4.488    | 4859878.8  | 2352755.4 | 0.00000 | ppm   | V    | 1            |               |
| 4     | 4.681    | 1319466.3  | 491871.3  | 0.00000 |       | SV   |              |               |
| 5     | 6.107    | 133823.6   | 51989.6   | 0.00000 |       |      |              |               |
| 6     | 7.331    | 548041.1   | 280069.1  | 0.00000 | ppm   | V    | 3            |               |
| 7     | 8.359    | 142023.7   | 54228.2   | 0.00000 | ppm   | SV   | 4            |               |
| 8     | 8.953    | 987485.6   | 436698.9  | 0.00000 |       | SV   |              |               |
| 9     | 12.739   | 184833.2   | 55792.2   | 0.00000 |       | SV   |              |               |

PPh3\_Ar\_Br\_4\_RT\_12H:

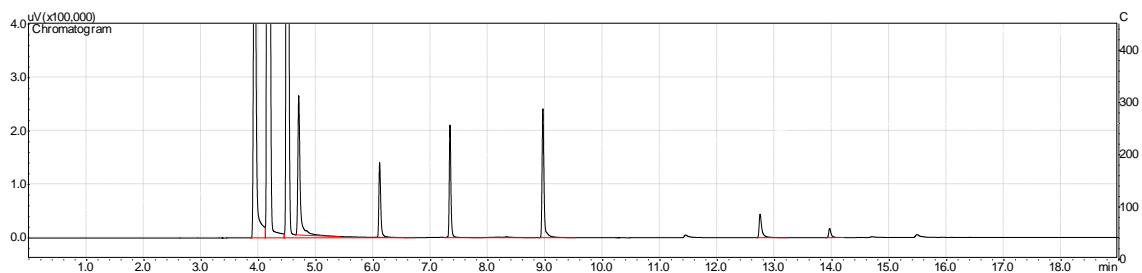

| Peak# | Ret.Time | Area       | Height    | Conc.   | Units | Mark | Compound ID# | Compound Name |
|-------|----------|------------|-----------|---------|-------|------|--------------|---------------|
| 1     | 3.928    | 2772004.0  | 975061.9  | 0.00000 |       | V    |              |               |
| 2     | 4.156    | 16266744.0 | 6036759.5 | 0.00000 | ppm   | V    | 1            |               |
| 3     | 4.497    | 7535612.1  | 3217339.0 | 0.00000 | ppm   | SV   | 1            |               |
| 4     | 4.699    | 755184.1   | 258995.0  | 0.00000 |       | T    |              |               |
| 5     | 6.110    | 322318.0   | 137936.8  | 0.00000 |       | T    |              |               |
| 6     | 7.337    | 428154.2   | 206074.3  | 0.00000 | ppm   | SV   | 3            |               |
| 7     | 8.957    | 574413.9   | 238682.0  | 0.00000 |       |      |              |               |
| 8     | 12.746   | 148351.3   | 43789.9   | 0.00000 |       | V    |              |               |
| 9     | 13.959   | 51121.3    | 17127.7   | 0.00000 |       | V    |              |               |

CyJohnPhos\_Ar\_Br\_4\_RT\_12H:

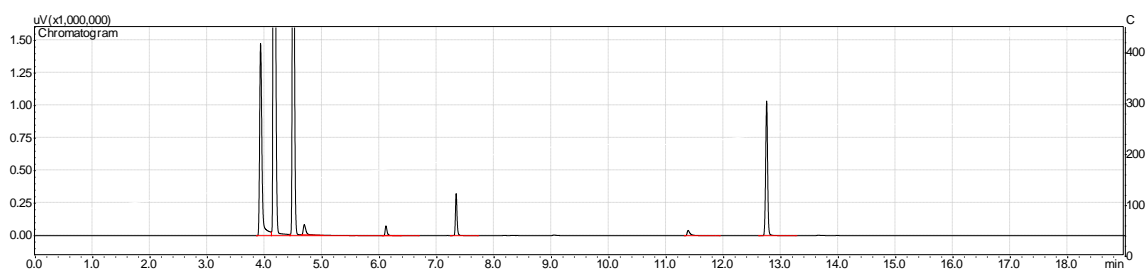

| Peak# | Ret.Time | Area       | Height    | Conc.   | Units | Mark | Compound ID# | Compound Name |
|-------|----------|------------|-----------|---------|-------|------|--------------|---------------|
| 1     | 3.927    | 4200061.2  | 1472141.2 | 0.00000 |       | V    |              |               |
| 2     | 4.158    | 14122868.6 | 5317643.8 | 0.00000 | ppm   | V    | 1            |               |
| 3     | 4.495    | 9817815.4  | 4168017.1 | 0.00000 | ppm   | SV   | 1            |               |
| 4     | 4.689    | 253745.4   | 76840.5   | 0.00000 |       | T    |              |               |
| 5     | 6.112    | 181269.2   | 75125.1   | 0.00000 |       | T    |              |               |
| 6     | 7.337    | 635468.7   | 317228.1  | 0.00000 | ppm   | SV   | 3            |               |
| 7     | 11.381   | 162265.3   | 40956.6   | 0.00000 |       |      |              |               |
| 8     | 12.750   | 2480096.5  | 1024229.0 | 0.00000 |       | V    |              |               |

JohnPhos\_Ar\_Br\_4\_RT\_12H:

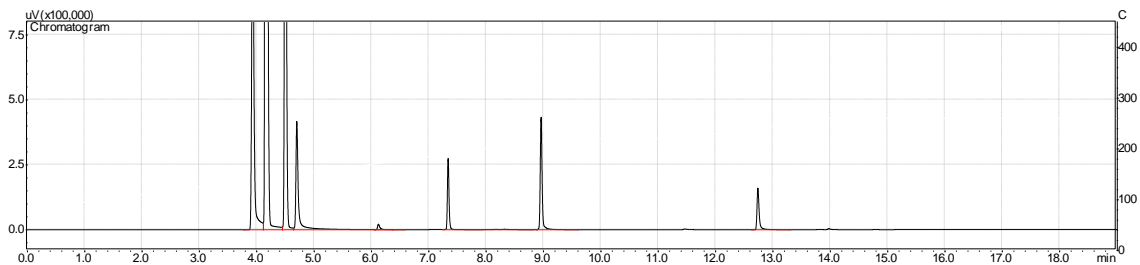

| Peak# | Ret.Time | Area       | Height    | Conc.   | Units | Mark | Compound ID# | Compound Name |
|-------|----------|------------|-----------|---------|-------|------|--------------|---------------|
| 1     | 3.928    | 3662711.3  | 1281815.7 | 0.00000 |       |      |              |               |
| 2     | 4.155    | 16221730.8 | 6049298.2 | 0.00000 | ppm   | V    | 1            |               |
| 3     | 4.498    | 5265432.5  | 2331319.2 | 0.00000 | ppm   | V    | 1            |               |
| 4     | 4.698    | 1329977.6  | 415312.9  | 0.00000 |       | SV   |              |               |
| 5     | 6.121    | 61373.5    | 21037.1   | 0.00000 |       | T    |              |               |
| 6     | 7.336    | 545394.6   | 268603.0  | 0.00000 | ppm   | SV   | 3            |               |
| 7     | 8.957    | 982904.0   | 430061.7  | 0.00000 |       |      |              |               |
| 8     | 12.738   | 425321.6   | 159722.0  | 0.00000 |       | S    |              |               |

2,4,6-trimethyl-1,1'-biphenyl

Ar\_Br\_5\_RT\_To

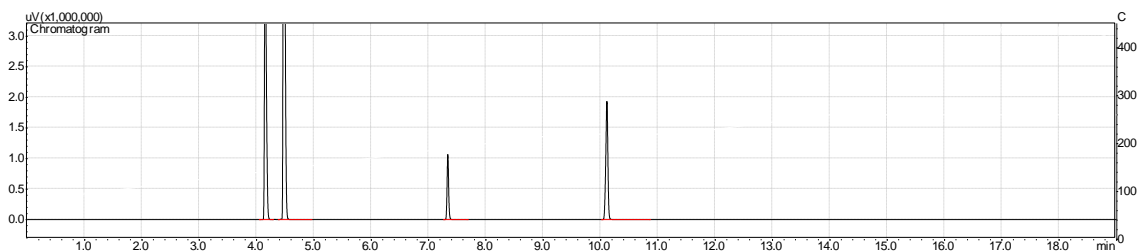

| Peak# | Ret.Time | Area       | Height    | Conc.   | Units | Mark | Compound ID# | Compound Name |
|-------|----------|------------|-----------|---------|-------|------|--------------|---------------|
| 1     | 4.149    | 10185532.8 | 4385318.6 | 0.00000 | ppm   | V    | 1            |               |
| 2     | 4.475    | 20446250.9 | 9344811.8 | 0.00000 | ppm   | V    | 1            |               |
| 3     | 7.335    | 2029652.7  | 1054788.5 | 0.00000 | ppm   | SV   | 3            |               |
| 4     | 10.110   | 4964057.7  | 1922839.7 | 0.00000 | ppm   | S    | 5            |               |

L1\_Ar\_Br\_5\_RT\_12H:

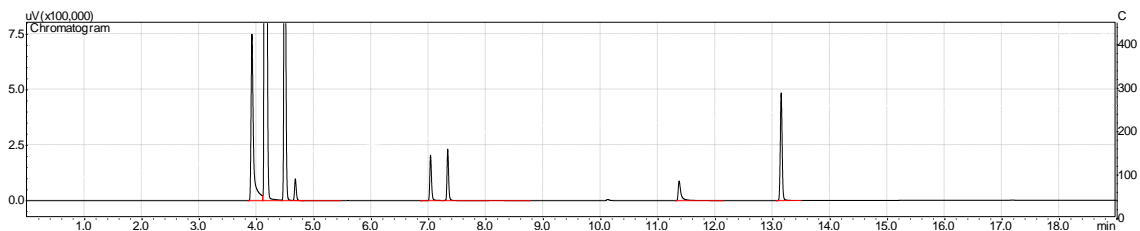

| Peak# | Ret.Time | Area | Height | Conc. | Units | Mark | Compound ID# | Compound Name |
|-------|----------|------|--------|-------|-------|------|--------------|---------------|
|-------|----------|------|--------|-------|-------|------|--------------|---------------|



|   |        |            |           |         |     |    |   |  |
|---|--------|------------|-----------|---------|-----|----|---|--|
| 1 | 3.917  | 2218199.0  | 742560.6  | 0.00000 |     | V  |   |  |
| 2 | 4.144  | 14250430.7 | 5704125.9 | 0.00000 | ppm | V  | 1 |  |
| 3 | 4.488  | 4302172.0  | 2089866.2 | 0.00000 | ppm | SV | 1 |  |
| 4 | 4.673  | 201041.5   | 96537.9   | 0.00000 |     | T  |   |  |
| 5 | 7.031  | 340197.9   | 204639.5  | 0.00000 | ppm | SV | 3 |  |
| 6 | 7.331  | 475140.1   | 230575.0  | 0.00000 | ppm | SV | 3 |  |
| 7 | 11.367 | 312171.5   | 88498.6   | 0.00000 |     | S  |   |  |
| 8 | 13.146 | 1094546.6  | 480854.6  | 0.00000 |     |    |   |  |

L3\_Ar\_Br\_5\_RT\_12H:

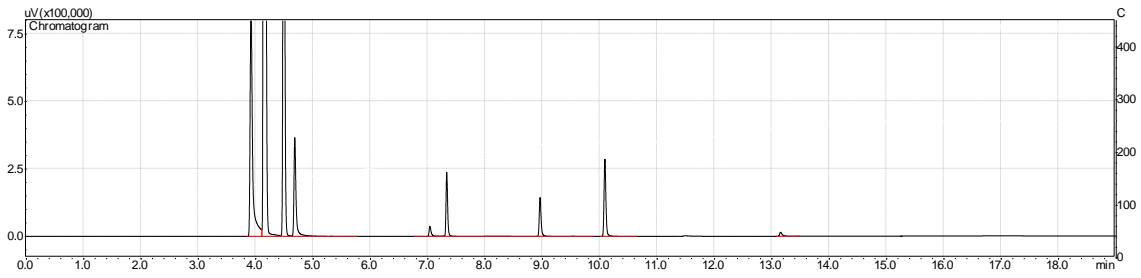

| Peak# | Ret.Time | Area       | Height    | Conc.   | Units | Mark | Compound ID# | Compound Name |
|-------|----------|------------|-----------|---------|-------|------|--------------|---------------|
| 1     | 3.918    | 2611702.8  | 882780.6  | 0.00000 |       | V    |              |               |
| 2     | 4.144    | 14435876.7 | 5715114.8 | 0.00000 | ppm   | V    | 1            |               |
| 3     | 4.488    | 4981556.2  | 2420044.3 | 0.00000 | ppm   | V    | 1            |               |
| 4     | 4.681    | 964823.8   | 362302.1  | 0.00000 |       | SV   |              |               |
| 5     | 7.037    | 105815.8   | 37526.8   | 0.00000 | ppm   | SV   | 3            |               |
| 6     | 7.330    | 485901.0   | 235817.9  | 0.00000 | ppm   | SV   | 3            |               |
| 7     | 8.957    | 324439.6   | 142970.8  | 0.00000 |       | SV   |              |               |
| 8     | 10.088   | 2953055.7  | 283973.5  | 0.00000 | ppm   | S    | 5            |               |
| 9     | 13.152   | 52588.4    | 15152.3   | 0.00000 |       |      |              |               |

PPh3\_Ar\_Br\_5\_RT\_12H:

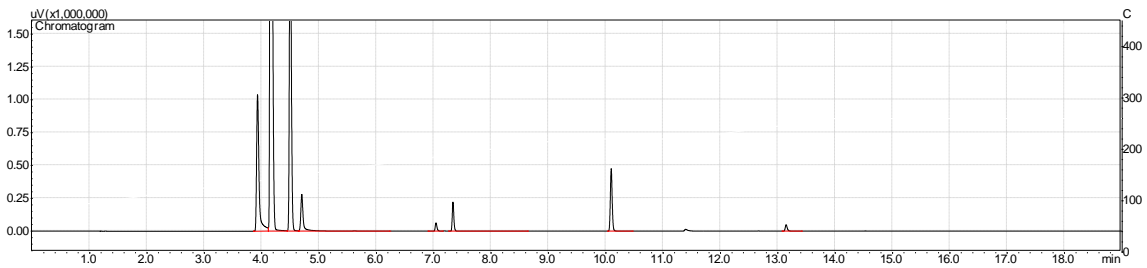

| Peak# | Ret.Time | Area       | Height    | Conc.   | Units | Mark | Compound ID# | Compound Name |
|-------|----------|------------|-----------|---------|-------|------|--------------|---------------|
| 1     | 3.927    | 3113944.3  | 1034006.0 | 0.00000 |       | V    |              |               |
| 2     | 4.155    | 16125156.5 | 5773740.0 | 0.00000 | ppm   | V    | 1            |               |
| 3     | 4.497    | 6170530.6  | 2644322.1 | 0.00000 | ppm   | V    | 1            |               |
| 4     | 4.698    | 907693.6   | 279182.3  | 0.00000 |       | SV   |              |               |

|   |        |           |          |         |     |    |   |  |
|---|--------|-----------|----------|---------|-----|----|---|--|
| 5 | 7.039  | 142383.4  | 62413.6  | 0.00000 | ppm | V  | 3 |  |
| 6 | 7.335  | 438806.8  | 220982.2 | 0.00000 | ppm | SV | 3 |  |
| 7 | 10.094 | 4436527.4 | 470579.8 | 0.00000 | ppm | S  | 5 |  |
| 8 | 13.145 | 120643.9  | 48086.4  | 0.00000 |     | V  |   |  |

CyJohnPhos\_Ar\_Br\_5\_RT\_12H:

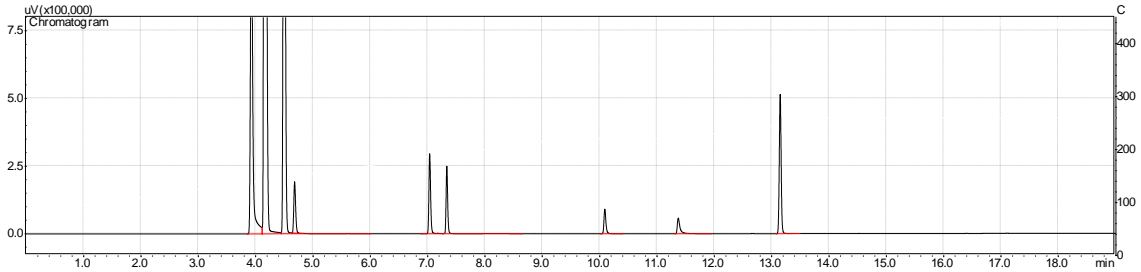

| Peak# | Ret.Time | Area       | Height    | Conc.   | Units | Mark | Compound ID# | Compound Name |
|-------|----------|------------|-----------|---------|-------|------|--------------|---------------|
| 1     | 3.925    | 3437159.4  | 1188967.1 | 0.00000 |       | V    |              |               |
| 2     | 4.154    | 15123871.7 | 5506904.2 | 0.00000 | ppm   | V    | 1            |               |
| 3     | 4.494    | 7507864.0  | 3231288.7 | 0.00000 | ppm   | SV   | 1            |               |
| 4     | 4.679    | 423254.3   | 188666.5  | 0.00000 |       | T    |              |               |
| 5     | 7.035    | 622658.5   | 293543.6  | 0.00000 | ppm   | SV   | 3            |               |
| 6     | 7.333    | 493176.2   | 246821.8  | 0.00000 | ppm   | SV   | 3            |               |
| 7     | 10.089   | 918174.9   | 90564.5   | 0.00000 | ppm   |      | 5            |               |
| 8     | 11.371   | 196494.3   | 57697.4   | 0.00000 |       |      |              |               |
| 9     | 13.148   | 1157849.8  | 510696.0  | 0.00000 |       |      |              |               |

JohnPhos\_Ar\_Br\_5\_RT\_12H:

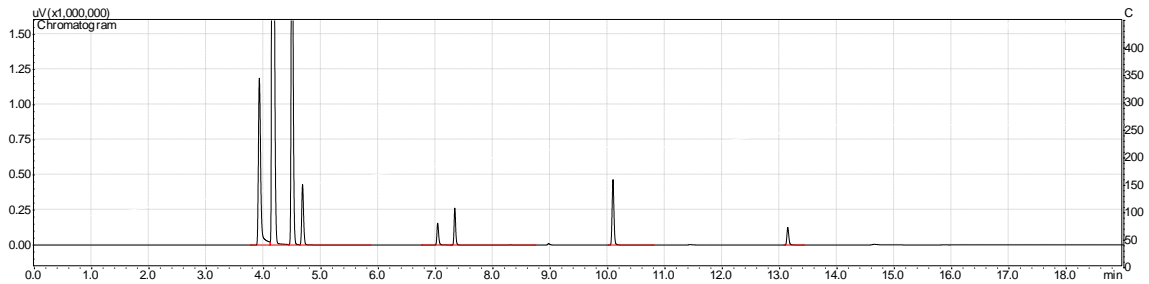

| Peak# | Ret.Time | Area       | Height    | Conc.   | Units | Mark | Compound ID# | Compound Name |
|-------|----------|------------|-----------|---------|-------|------|--------------|---------------|
| 1     | 3.925    | 3421247.7  | 1176924.7 | 0.00000 |       |      |              |               |
| 2     | 4.154    | 15458552.8 | 5608169.3 | 0.00000 | ppm   | V    | 1            |               |
| 3     | 4.494    | 6616093.3  | 2849006.9 | 0.00000 | ppm   | V    | 1            |               |
| 4     | 4.678    | 1009283.2  | 430481.0  | 0.00000 |       | SV   |              |               |
| 5     | 7.035    | 344664.1   | 155804.2  | 0.00000 | ppm   | SV   | 3            |               |
| 6     | 7.334    | 517728.7   | 261555.6  | 0.00000 | ppm   | SV   | 3            |               |
| 7     | 10.093   | 3448786.1  | 463527.6  | 0.00000 | ppm   | S    | 5            |               |

|   |        |          |          |         |  |  |  |  |
|---|--------|----------|----------|---------|--|--|--|--|
| 8 | 13.142 | 293102.2 | 124062.8 | 0.00000 |  |  |  |  |
|---|--------|----------|----------|---------|--|--|--|--|

2-Methoxy-biphenyl

Ar\_Br\_6\_RT\_To

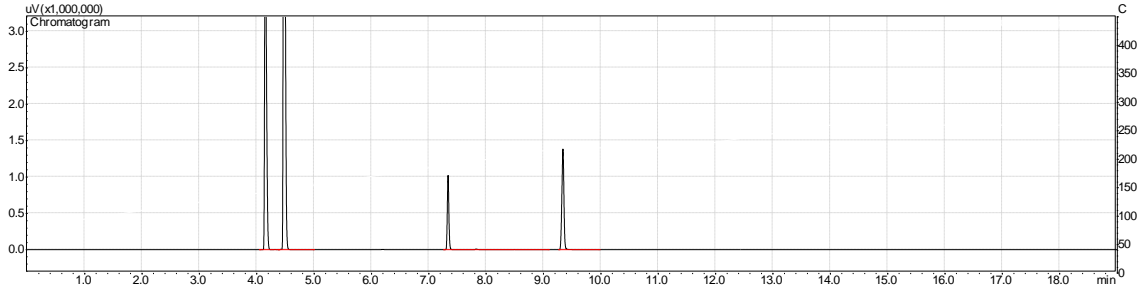

| Peak# | Ret.Time | Area       | Height    | Conc.   | Units | Mark | Compound ID# | Compound Name |
|-------|----------|------------|-----------|---------|-------|------|--------------|---------------|
| 1     | 4.149    | 10164641.1 | 4365003.6 | 0.00000 | ppm   | SV   | 1            |               |
| 2     | 4.474    | 21218423.1 | 9652291.5 | 0.00000 | ppm   | V    | 1            |               |
| 3     | 7.335    | 1938495.0  | 1011905.5 | 0.00000 | ppm   | SV   | 3            |               |
| 4     | 9.338    | 3465831.9  | 1369660.0 | 0.00000 | ppm   | V    | 5            |               |

L1\_Ar\_Br\_6\_RT\_12H:

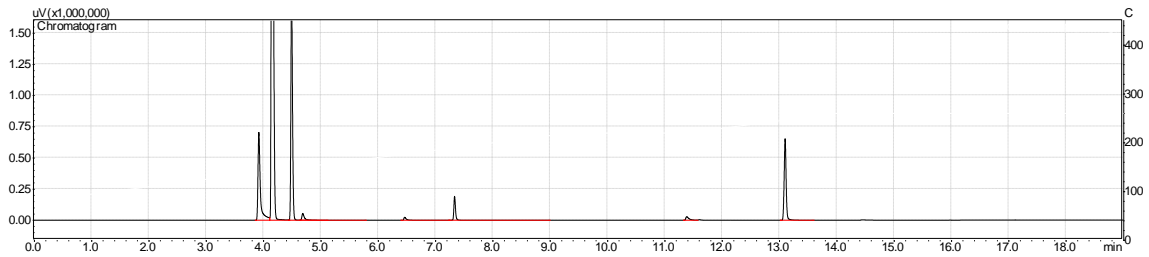

| Peak# | Ret.Time | Area       | Height    | Conc.   | Units | Mark | Compound ID# | Compound Name |
|-------|----------|------------|-----------|---------|-------|------|--------------|---------------|
| 1     | 3.917    | 2057239.7  | 697907.3  | 0.00000 |       | V    |              |               |
| 2     | 4.146    | 12373237.3 | 5109163.6 | 0.00000 | ppm   | V    | 1            |               |
| 3     | 4.488    | 3631220.6  | 1757309.4 | 0.00000 | ppm   | SV   | 1            |               |
| 4     | 4.683    | 170705.6   | 53762.5   | 0.00000 |       | T    |              |               |
| 5     | 6.461    | 31465.6    | 24910.6   | 0.00000 | ppm   | SV   | 2            |               |
| 6     | 7.331    | 405706.6   | 190240.7  | 0.00000 | ppm   | SV   | 3            |               |
| 7     | 11.382   | 124468.5   | 29513.2   | 0.00000 |       |      |              |               |
| 8     | 13.097   | 1572789.1  | 649858.0  | 0.00000 |       |      |              |               |

L3\_Ar\_Br\_6\_RT\_12H:

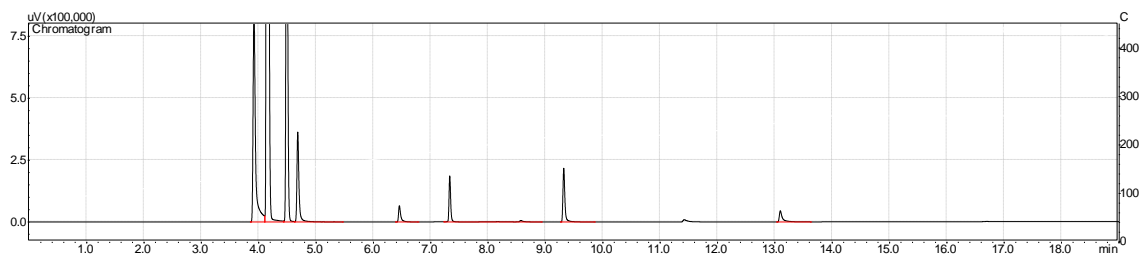

| Peak# | Ret.Time | Area       | Height    | Conc.   | Units | Mark | Compound ID# | Compound Name |
|-------|----------|------------|-----------|---------|-------|------|--------------|---------------|
| 1     | 3.917    | 2582219.5  | 881732.2  | 0.00000 |       | V    |              |               |
| 2     | 4.144    | 13839352.1 | 5564829.0 | 0.00000 | ppm   | V    | 1            |               |
| 3     | 4.488    | 4224617.3  | 2065984.0 | 0.00000 | ppm   | V    | 1            |               |
| 4     | 4.680    | 920912.2   | 361623.1  | 0.00000 |       | SV   |              |               |
| 5     | 6.452    | 185563.9   | 65783.4   | 0.00000 | ppm   | V    | 2            |               |
| 6     | 7.331    | 388759.9   | 185182.6  | 0.00000 | ppm   | SV   | 3            |               |
| 7     | 9.319    | 2521232    | 215802.6  | 0.00000 | ppm   | V    | 5            |               |
| 8     | 13.095   | 176259.4   | 44870.6   | 0.00000 |       | S    |              |               |

PPh3\_Ar\_Br\_6\_RT\_12H:

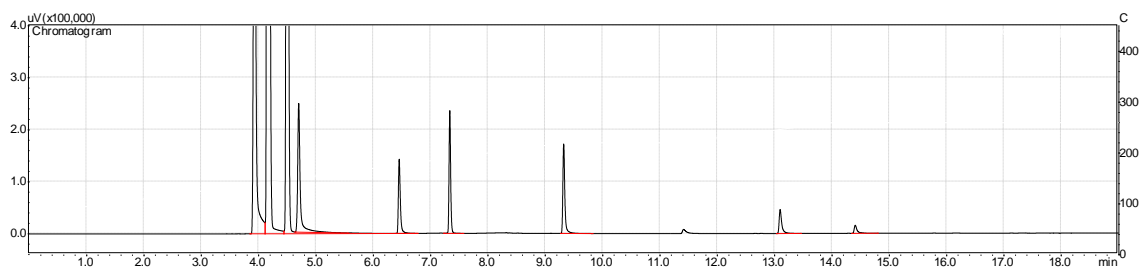

| Peak# | Ret.Time | Area       | Height    | Conc.   | Units | Mark | Compound ID# | Compound Name |
|-------|----------|------------|-----------|---------|-------|------|--------------|---------------|
| 1     | 3.925    | 3101296.1  | 1066655.8 | 0.00000 |       | V    |              |               |
| 2     | 4.155    | 14652983.1 | 5406725.2 | 0.00000 | ppm   | V    | 1            |               |
| 3     | 4.495    | 6602516.7  | 2781679.3 | 0.00000 | ppm   | SV   | 1            |               |
| 4     | 4.698    | 768762.9   | 245978.7  | 0.00000 |       | T    |              |               |
| 5     | 6.451    | 337685.5   | 141420.8  | 0.00000 | ppm   | T    | 2            |               |
| 6     | 7.333    | 456857.7   | 233464.1  | 0.00000 | ppm   | V    | 3            |               |
| 7     | 9.320    | 1914389    | 168976.2  | 0.00000 | ppm   | V    | 5            |               |
| 8     | 13.095   | 146028.2   | 45641.3   | 0.00000 |       |      |              |               |
| 9     | 14.405   | 57137.2    | 15634.9   | 0.00000 | ppm   | V    | 6            |               |

CyJohnPhos\_Ar\_Br\_6\_RT\_12H:

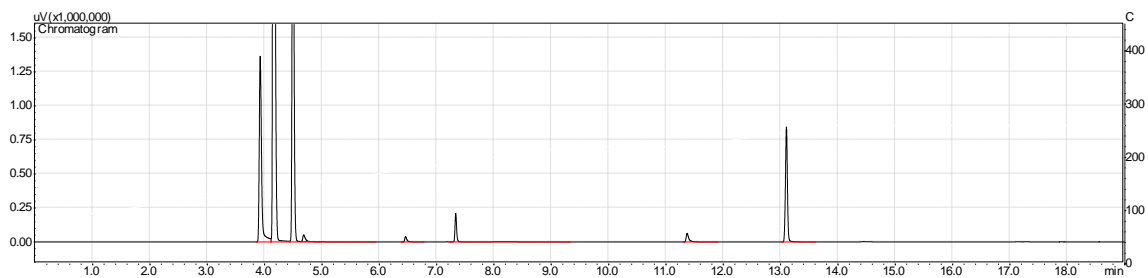

| Peak# | Ret.Time | Area       | Height    | Conc.   | Units | Mark | Compound ID# | Compound Name |
|-------|----------|------------|-----------|---------|-------|------|--------------|---------------|
| 1     | 3.922    | 3800493.7  | 1357670.6 | 0.00000 |       | V    |              |               |
| 2     | 4.153    | 14848827.7 | 5505807.2 | 0.00000 | ppm   | V    | 1            |               |
| 3     | 4.492    | 7538563.8  | 3272810.2 | 0.00000 | ppm   | SV   | 1            |               |
| 4     | 4.681    | 155614.5   | 49373.3   | 0.00000 |       | T    |              |               |
| 5     | 6.458    | 113566.6   | 39853.5   | 0.00000 | ppm   | V    | 2            |               |
| 6     | 7.333    | 443872.1   | 205672.5  | 0.00000 | ppm   | SV   | 3            |               |
| 7     | 11.369   | 211723.7   | 62658.2   | 0.00000 |       | S    |              |               |
| 8     | 13.101   | 2035719.4  | 838148.8  | 0.00000 |       |      |              |               |

JohnPhos\_Ar\_Br\_6\_RT\_12H:

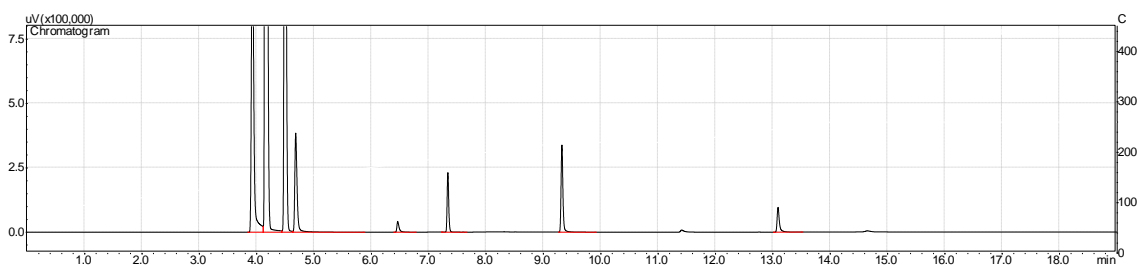

| Peak# | Ret.Time | Area       | Height    | Conc.   | Units | Mark | Compound ID# | Compound Name |
|-------|----------|------------|-----------|---------|-------|------|--------------|---------------|
| 1     | 3.924    | 3685972.4  | 1278127.7 | 0.00000 |       | V    |              |               |
| 2     | 4.153    | 15304740.1 | 5637033.8 | 0.00000 | ppm   | V    | 1            |               |
| 3     | 4.493    | 7290058.9  | 3184302.5 | 0.00000 | ppm   | V    | 1            |               |
| 4     | 4.680    | 1111168.4  | 384157.8  | 0.00000 |       | SV   |              |               |
| 5     | 6.459    | 118850.4   | 41623.1   | 0.00000 | ppm   |      | 2            |               |
| 6     | 7.333    | 447874.4   | 227396.6  | 0.00000 | ppm   | SV   | 3            |               |
| 7     | 9.321    | 2372664.8  | 335865.2  | 0.00000 | ppm   | V    | 5            |               |
| 8     | 13.090   | 274121.8   | 95496.7   | 0.00000 |       |      |              |               |

2,6-Dimethoxy-1,1'-biphenyl

Ar\_Br\_7\_RT\_To

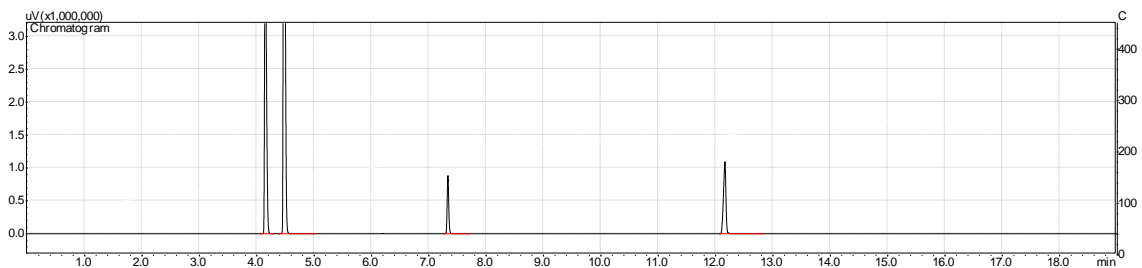

| Peak# | Ret.Time | Area       | Height    | Conc.   | Units | Mark | Compound ID# | Compound Name |
|-------|----------|------------|-----------|---------|-------|------|--------------|---------------|
| 1     | 4.149    | 10382835.0 | 4449320.3 | 0.00000 | ppm   | V    | 1            |               |
| 2     | 4.475    | 20290124.9 | 9270132.7 | 0.00000 | ppm   | SV   | 1            |               |
| 3     | 7.332    | 1673390.4  | 867703.8  | 0.00000 | ppm   | SV   | 3            |               |
| 4     | 12.162   | 3279090.1  | 1080812.7 | 0.00000 |       | S    |              |               |

L1\_Ar\_Br\_7\_RT\_12H:

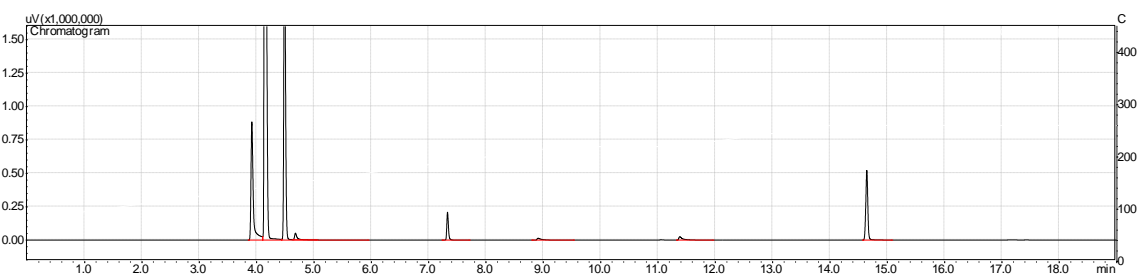

| Peak# | Ret.Time | Area       | Height    | Conc.   | Units | Mark | Compound ID# | Compound Name |
|-------|----------|------------|-----------|---------|-------|------|--------------|---------------|
| 1     | 3.916    | 2471582.0  | 874623.8  | 0.00000 |       | V    |              |               |
| 2     | 4.144    | 13893369.6 | 5563501.6 | 0.00000 | ppm   | V    | 1            |               |
| 3     | 4.486    | 5224971.7  | 2463232.8 | 0.00000 | ppm   | SV   | 1            |               |
| 4     | 4.676    | 145198.3   | 49397.3   | 0.00000 |       | T    |              |               |
| 5     | 7.329    | 417416.2   | 206086.5  | 0.00000 | ppm   | SV   | 3            |               |
| 6     | 8.909    | 45107.2    | 14375.8   | 0.00000 |       |      |              |               |
| 7     | 11.381   | 134599.6   | 25797.8   | 0.00000 |       | V    |              |               |
| 8     | 14.642   | 1283997.1  | 518215.5  | 0.00000 | ppm   |      | 6            |               |

L3\_Ar\_Br\_7\_RT\_12H:

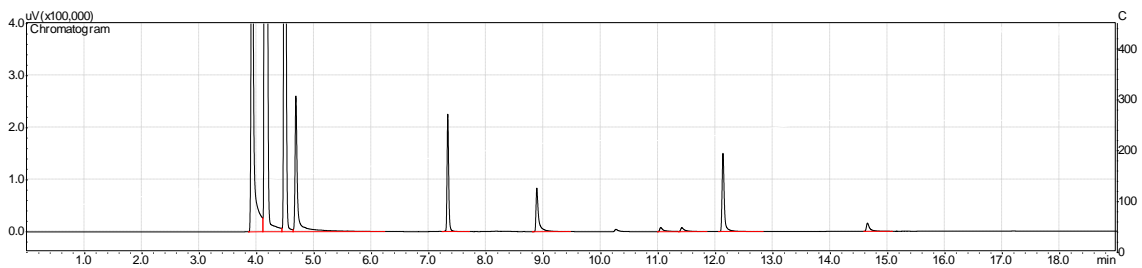

| Peak# | Ret.Time | Area       | Height    | Conc.   | Units | Mark | Compound ID# | Compound Name |
|-------|----------|------------|-----------|---------|-------|------|--------------|---------------|
| 1     | 3.917    | 2599615.1  | 917727.9  | 0.00000 |       | V    |              |               |
| 2     | 4.145    | 14017958.0 | 5564051.1 | 0.00000 | ppm   | V    | 1            |               |
| 3     | 4.487    | 5195686.7  | 2504359.3 | 0.00000 | ppm   | V    | 1            |               |
| 4     | 4.682    | 850439.1   | 257675.7  | 0.00000 |       | SV   |              |               |
| 5     | 7.330    | 447871.3   | 224262.8  | 0.00000 | ppm   | SV   | 3            |               |
| 6     | 8.883    | 264284.5   | 83013.7   | 0.00000 |       |      |              |               |
| 7     | 11.043   | 42124.7    | 8096.0    | 0.00000 |       |      |              |               |
| 8     | 11.411   | 40136.4    | 7579.2    | 0.00000 |       | V    |              |               |
| 9     | 12.128   | 1708242.7  | 149553.0  | 0.00000 |       | S    |              |               |
| 10    | 14.648   | 67866.3    | 15975.5   | 0.00000 | ppm   |      | 6            |               |

PPh3\_Ar\_Br\_7\_RT\_12H:

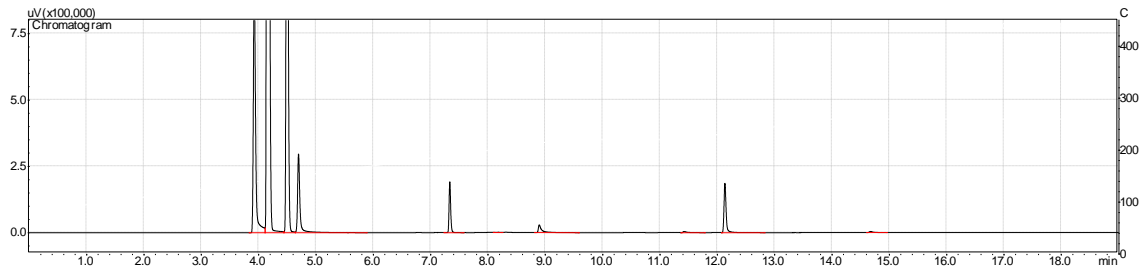

| Peak# | Ret.Time | Area       | Height    | Conc.   | Units | Mark | Compound ID# | Compound Name |
|-------|----------|------------|-----------|---------|-------|------|--------------|---------------|
| 1     | 3.923    | 2562620.8  | 913840.1  | 0.00000 |       | V    |              |               |
| 2     | 4.151    | 16483698.3 | 6017166.9 | 0.00000 | ppm   | V    | 1            |               |
| 3     | 4.494    | 5868890.2  | 2590994.8 | 0.00000 | ppm   | V    | 1            |               |
| 4     | 4.695    | 871920.4   | 293017.8  | 0.00000 |       | SV   |              |               |
| 5     | 7.333    | 374035.2   | 189259.9  | 0.00000 | ppm   | V    | 3            |               |
| 6     | 8.183    | 10801.6    | 1412.0    | 0.00000 | ppm   | V    | 4            |               |
| 7     | 8.894    | 125248.3   | 29352.3   | 0.00000 |       | S    |              |               |
| 8     | 11.422   | 22069.7    | 4255.9    | 0.00000 |       | V    |              |               |
| 9     | 12.132   | 2879630.8  | 184866.8  | 0.00000 |       | SV   |              |               |
| 10    | 14.671   | 19096.8    | 3978.1    | 0.00000 | ppm   |      | 6            |               |

CyJohnPhos\_Ar\_Br\_7\_RT\_12H:

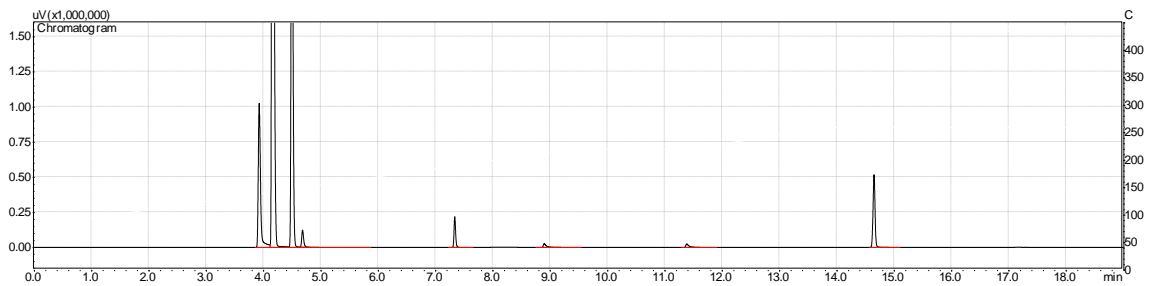

| Peak# | Ret.Time | Area       | Height    | Conc.   | Units | Mark | Compound ID# | Compound Name |
|-------|----------|------------|-----------|---------|-------|------|--------------|---------------|
| 1     | 3.922    | 2843351.5  | 1023290.4 | 0.00000 |       | V    |              |               |
| 2     | 4.152    | 15687202.7 | 5770111.1 | 0.00000 | ppm   | V    | 1            |               |
| 3     | 4.492    | 7763484.1  | 3377418.7 | 0.00000 | ppm   | SV   | 1            |               |
| 4     | 4.678    | 279962.2   | 120243.8  | 0.00000 |       | T    |              |               |
| 5     | 7.333    | 422970.5   | 216573.4  | 0.00000 | ppm   | SV   | 3            |               |
| 6     | 8.894    | 77420.1    | 27389.4   | 0.00000 |       | SV   |              |               |
| 7     | 11.381   | 113169.6   | 25028.7   | 0.00000 |       |      |              |               |
| 8     | 14.647   | 1268155.6  | 514070.1  | 0.00000 | ppm   |      | 6            |               |

JohnPhos\_Ar\_Br\_7\_RT\_12H:

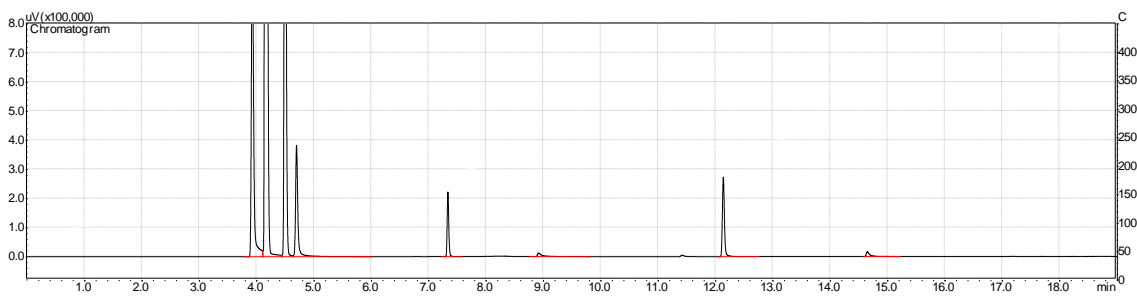

| Peak# | Ret.Time | Area       | Height    | Conc.   | Units | Mark | Compound ID# | Compound Name |
|-------|----------|------------|-----------|---------|-------|------|--------------|---------------|
| 1     | 3.922    | 3079309.8  | 1103842.4 | 0.00000 |       |      |              |               |
| 2     | 4.150    | 15937700.3 | 5860617.1 | 0.00000 | ppm   | V    | 1            |               |
| 3     | 4.493    | 5667063.3  | 2525898.7 | 0.00000 | ppm   | V    | 1            |               |
| 4     | 4.693    | 1085227.4  | 381922.0  | 0.00000 |       | SV   |              |               |
| 5     | 7.332    | 429675.1   | 216866.9  | 0.00000 | ppm   | V    | 3            |               |
| 6     | 8.912    | 79912.3    | 12570.0   | 0.00000 |       | SV   |              |               |
| 7     | 12.135   | 2789707.9  | 270661.0  | 0.00000 |       | S    |              |               |
| 8     | 14.646   | 77726.2    | 16467.4   | 0.00000 | ppm   | S    | 6            |               |

2-Phenylnaphthalene

Ar\_Br\_8\_RT\_To

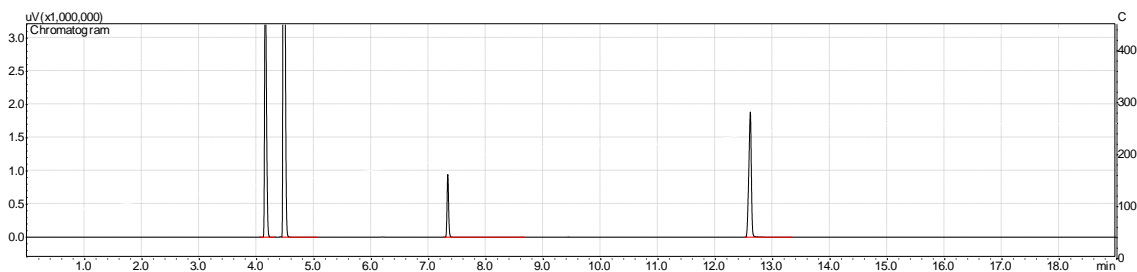

| Peak# | Ret.Time | Area | Height | Conc. | Units | Mark | Compound ID# | Compound Name |
|-------|----------|------|--------|-------|-------|------|--------------|---------------|
|-------|----------|------|--------|-------|-------|------|--------------|---------------|



|   |        |            |            |         |     |    |   |  |
|---|--------|------------|------------|---------|-----|----|---|--|
| 1 | 4.151  | 9007669.2  | 3961869.9  | 0.00000 | ppm | V  | 1 |  |
| 2 | 4.472  | 23041119.4 | 10326071.9 | 0.00000 | ppm | SV | 1 |  |
| 3 | 7.333  | 1798784.5  | 928800.7   | 0.00000 | ppm | SV | 3 |  |
| 4 | 12.609 | 5811076.1  | 1873679.4  | 0.00000 |     |    |   |  |

L1\_Ar\_Br\_8\_RT\_12H:

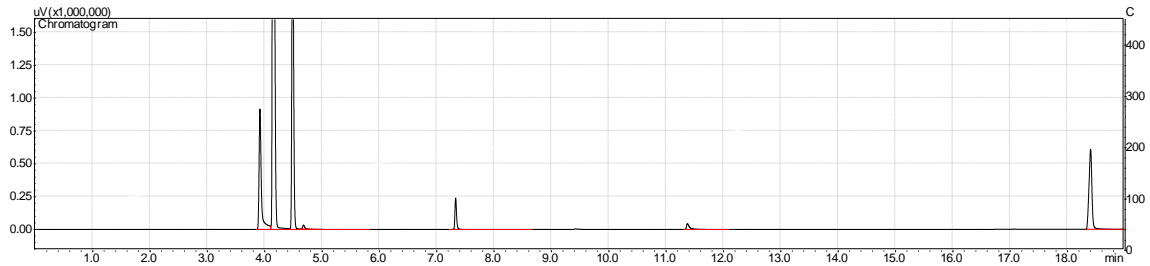

| Peak# | Ret.Time | Area       | Height    | Conc.   | Units | Mark | Compound ID# | Compound Name |
|-------|----------|------------|-----------|---------|-------|------|--------------|---------------|
| 1     | 3.916    | 2549295.1  | 906565.7  | 0.00000 |       | V    |              |               |
| 2     | 4.146    | 13078365.2 | 5303977.1 | 0.00000 | ppm   | V    | 1            |               |
| 3     | 4.486    | 5689663.1  | 2694061.8 | 0.00000 | ppm   | SV   | 1            |               |
| 4     | 4.676    | 80077.4    | 31227.1   | 0.00000 |       | T    |              |               |
| 5     | 7.329    | 493423.0   | 238249.8  | 0.00000 | ppm   | SV   | 3            |               |
| 6     | 11.372   | 197406.3   | 44686.8   | 0.00000 |       | V    |              |               |
| 7     | 18.401   | 2199825.1  | 606511.0  | 0.00000 | ppm   |      | 8            |               |

L3\_Ar\_Br\_8\_RT\_12H:

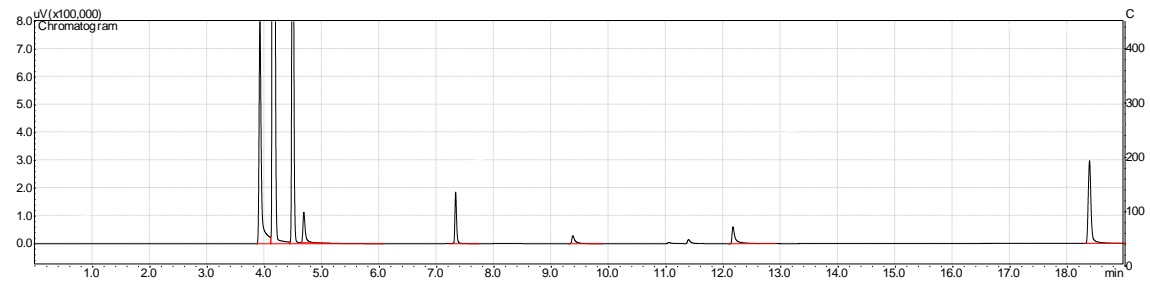

| Peak# | Ret.Time | Area       | Height    | Conc.   | Units | Mark | Compound ID# | Compound Name |
|-------|----------|------------|-----------|---------|-------|------|--------------|---------------|
| 1     | 3.917    | 2245650.5  | 799086.4  | 0.00000 |       | V    |              |               |
| 2     | 4.145    | 13852437.4 | 5524107.5 | 0.00000 | ppm   | V    | 1            |               |
| 3     | 4.487    | 4651225.9  | 2192271.1 | 0.00000 | ppm   | SV   | 1            |               |
| 4     | 4.683    | 322429.1   | 108673.5  | 0.00000 |       | T    |              |               |
| 5     | 7.330    | 376013.6   | 184621.5  | 0.00000 | ppm   | SV   | 3            |               |
| 6     | 9.373    | 89901.1    | 28786.4   | 0.00000 | ppm   |      | 5            |               |
| 7     | 12.166   | 253104.6   | 60467.7   | 0.00000 |       | S    |              |               |
| 8     | 18.384   | 1038551.5  | 296871.9  | 0.00000 | ppm   |      | 8            |               |

CyJohnPhos\_Ar\_Br\_8\_RT\_12H:

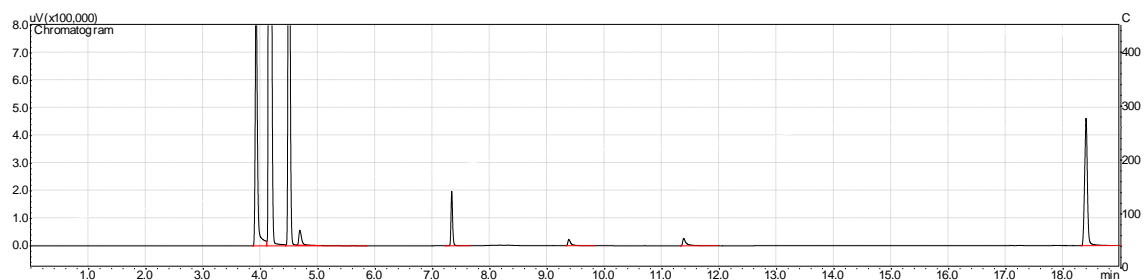

| Peak# | Ret.Time | Area       | Height    | Conc.   | Units | Mark | Compound ID# | Compound Name |
|-------|----------|------------|-----------|---------|-------|------|--------------|---------------|
| 1     | 3.921    | 2511955.8  | 918006.9  | 0.00000 |       | V    |              |               |
| 2     | 4.150    | 16497388.3 | 6005278.7 | 0.00000 | ppm   | V    | 1            |               |
| 3     | 4.493    | 5072144.2  | 2222363.7 | 0.00000 | ppm   | SV   | 1            |               |
| 4     | 4.683    | 180859.5   | 53978.7   | 0.00000 |       | T    |              |               |
| 5     | 7.332    | 386525.7   | 193039.7  | 0.00000 | ppm   | SV   | 3            |               |
| 6     | 9.375    | 85550.6    | 23081.2   | 0.00000 | ppm   |      | 5            |               |
| 7     | 11.379   | 121720.8   | 26941.1   | 0.00000 |       |      |              |               |
| 8     | 18.396   | 1561941.9  | 457420.9  | 0.00000 | ppm   |      | 8            |               |

JohnPhos\_Ar\_Br\_8\_RT\_12H:

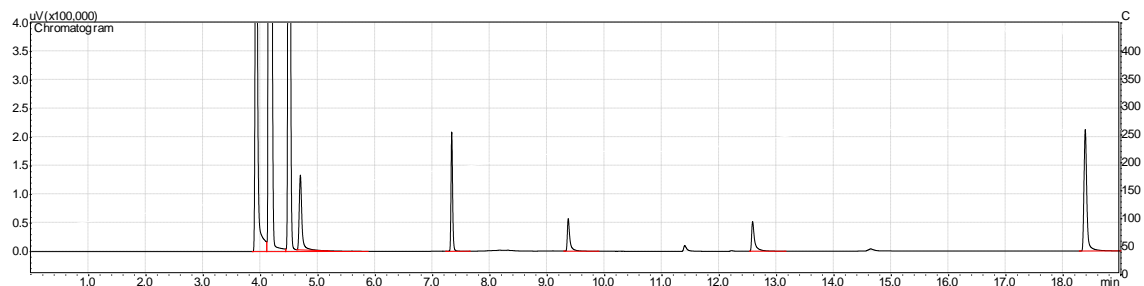

| Peak# | Ret.Time | Area       | Height    | Conc.   | Units | Mark | Compound ID# | Compound Name |
|-------|----------|------------|-----------|---------|-------|------|--------------|---------------|
| 1     | 3.921    | 2549485.6  | 921362.4  | 0.00000 |       | V    |              |               |
| 2     | 4.150    | 16422252.4 | 5961486.2 | 0.00000 | ppm   | V    | 1            |               |
| 3     | 4.493    | 5548850.1  | 2413766.9 | 0.00000 | ppm   | SV   | 1            |               |
| 4     | 4.693    | 425431.8   | 130481.0  | 0.00000 |       | T    |              |               |
| 5     | 7.333    | 405587.2   | 204224.3  | 0.00000 | ppm   | SV   | 3            |               |
| 6     | 9.365    | 179131.8   | 57064.3   | 0.00000 | ppm   | V    | 5            |               |
| 7     | 12.581   | 593155.5   | 51748.5   | 0.00000 |       |      |              |               |
| 8     | 18.383   | 737498.7   | 210284.5  | 0.00000 | ppm   |      | 8            |               |

2-Methoxy-6-phenylnaphthalene

Ar\_Br\_9\_RT\_To

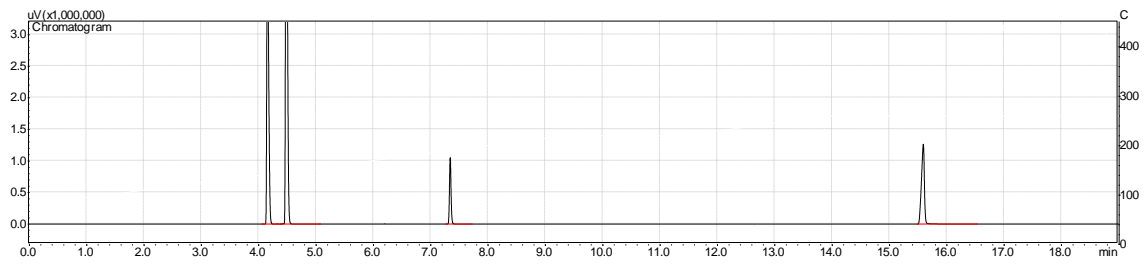

| Peak# | Ret.Time | Area       | Height    | Conc.   | Units | Mark | Compound ID# | Compound Name |
|-------|----------|------------|-----------|---------|-------|------|--------------|---------------|
| 1     | 4.153    | 10698300.9 | 4582010.0 | 0.00000 | ppm   | SV   | 1            |               |
| 2     | 4.480    | 18822564.3 | 8620170.7 | 0.00000 | ppm   | V    | 1            |               |
| 3     | 7.339    | 2014845.0  | 1046882.8 | 0.00000 | ppm   | SV   | 3            |               |
| 4     | 15.589   | 4525015.0  | 1260569.8 | 0.00000 | ppm   | S    | 6            |               |

L1\_Ar\_Br\_9\_RT\_12H:

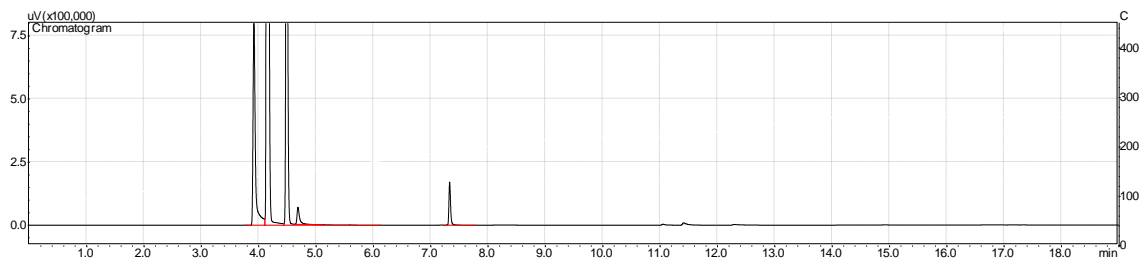

| Peak# | Ret.Time | Area       | Height    | Conc.   | Units | Mark | Compound ID# | Compound Name |
|-------|----------|------------|-----------|---------|-------|------|--------------|---------------|
| 1     | 3.916    | 2351326.1  | 835155.9  | 0.00000 |       |      |              |               |
| 2     | 4.146    | 13152263.9 | 5317185.1 | 0.00000 | ppm   | V    | 1            |               |
| 3     | 4.486    | 5073611.0  | 2381895.0 | 0.00000 | ppm   | SV   | 1            |               |
| 4     | 4.684    | 215912.9   | 67511.1   | 0.00000 |       | T    |              |               |
| 5     | 7.329    | 350083.9   | 168989.7  | 0.00000 | ppm   | V    | 3            |               |

L3\_Ar\_Br\_9\_RT\_12H:

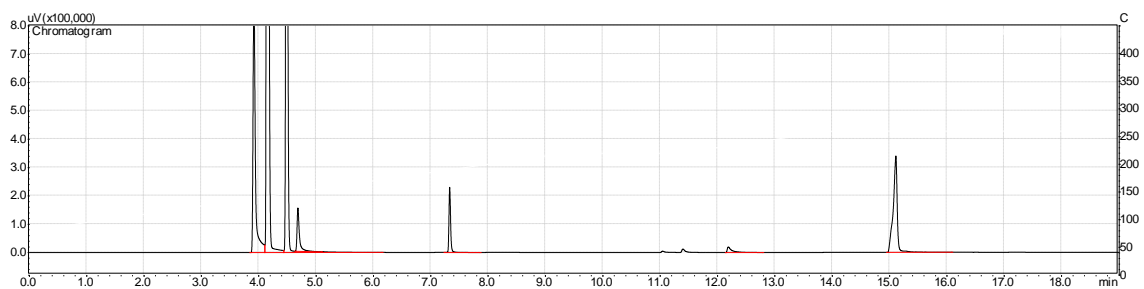

| Peak# | Ret.Time | Area       | Height    | Conc.   | Units | Mark | Compound ID# | Compound Name |
|-------|----------|------------|-----------|---------|-------|------|--------------|---------------|
| 1     | 3.916    | 2645976.9  | 941640.3  | 0.00000 |       | V    |              |               |
| 2     | 4.146    | 12371332.4 | 5086380.5 | 0.00000 | ppm   | V    | 1            |               |

|   |        |           |           |         |     |    |   |  |
|---|--------|-----------|-----------|---------|-----|----|---|--|
| 3 | 4.485  | 7030724.2 | 3293094.7 | 0.00000 | ppm | SV | 1 |  |
| 4 | 4.683  | 449515.9  | 151437.1  | 0.00000 |     | T  |   |  |
| 5 | 7.329  | 459548.8  | 228372.8  | 0.00000 | ppm | SV | 3 |  |
| 6 | 12.189 | 116533.9  | 19840.2   | 0.00000 |     | S  |   |  |
| 7 | 15.109 | 1664022.5 | 339446.0  | 0.00000 | ppm | S  | 6 |  |

CyJohnPhos\_Ar\_Br\_9\_RT\_12H:

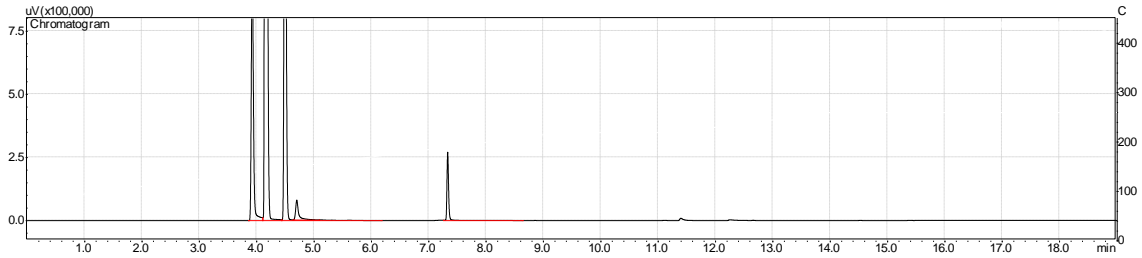

| Peak# | Ret.Time | Area       | Height    | Conc.   | Units | Mark | Compound ID# | Compound Name |
|-------|----------|------------|-----------|---------|-------|------|--------------|---------------|
| 1     | 3.921    | 2646147.4  | 1004117.8 | 0.00000 |       | V    |              |               |
| 2     | 4.150    | 15754340.7 | 5822421.6 | 0.00000 | ppm   | V    | 1            |               |
| 3     | 4.491    | 6645622.5  | 2887385.2 | 0.00000 | ppm   | SV   | 1            |               |
| 4     | 4.698    | 310295.2   | 79086.2   | 0.00000 |       | T    |              |               |
| 5     | 7.329    | 567587.9   | 269363.1  | 0.00000 | ppm   | SV   | 3            |               |

JohnPhos\_Ar\_Br\_9\_RT\_12H:

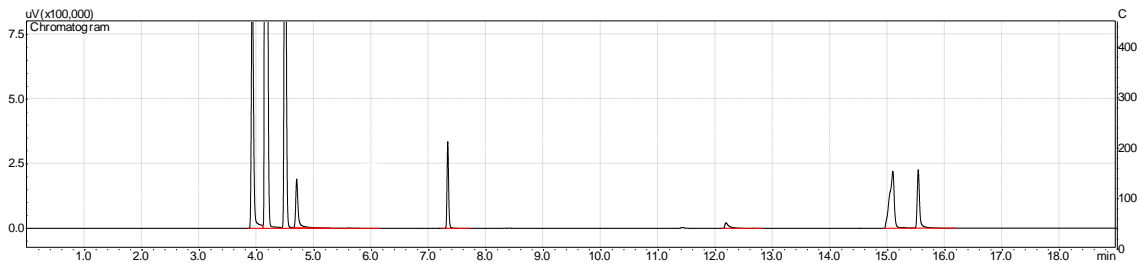

| Peak# | Ret.Time | Area       | Height    | Conc.   | Units | Mark | Compound ID# | Compound Name |
|-------|----------|------------|-----------|---------|-------|------|--------------|---------------|
| 1     | 3.922    | 2668589.4  | 997908.9  | 0.00000 |       | V    |              |               |
| 2     | 4.150    | 15905333.4 | 5852832.7 | 0.00000 | ppm   | V    | 1            |               |
| 3     | 4.492    | 5339040.5  | 2322446.8 | 0.00000 | ppm   | SV   | 1            |               |
| 4     | 4.696    | 563269.6   | 185345.4  | 0.00000 |       | T    |              |               |
| 5     | 7.329    | 646209.1   | 333694.6  | 0.00000 | ppm   | SV   | 3            |               |
| 6     | 12.180   | 115823.0   | 21831.5   | 0.00000 |       | S    |              |               |
| 7     | 15.089   | 1273396.2  | 220789.5  | 0.00000 | ppm   | S    | 6            |               |
| 8     | 15.533   | 679665.0   | 225184.7  | 0.00000 | ppm   | V    | 6            |               |

2,4'-Dimethyl-1,1'-biphenyl

Ar\_Br\_10\_RT\_To

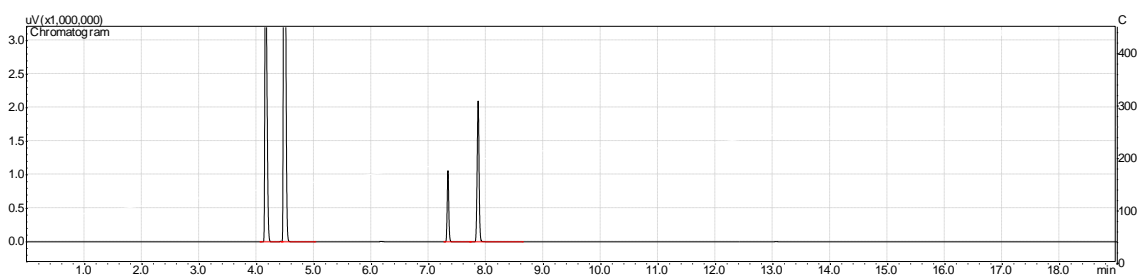

| Peak# | Ret.Time | Area       | Height    | Conc.   | Units | Mark | Compound ID# | Compound Name |
|-------|----------|------------|-----------|---------|-------|------|--------------|---------------|
| 1     | 4.154    | 11240263.0 | 4435319.0 | 0.00000 | ppm   | SV   | 1            |               |
| 2     | 4.479    | 22748401.1 | 9603548.3 | 0.00000 | ppm   | V    | 1            |               |
| 3     | 7.333    | 2017808.1  | 1048190.0 | 0.00000 | ppm   | SV   | 3            |               |
| 4     | 7.859    | 4897215.1  | 2066624.7 | 0.00000 |       | S    |              |               |

L1\_Ar\_Br\_10\_RT\_12H:

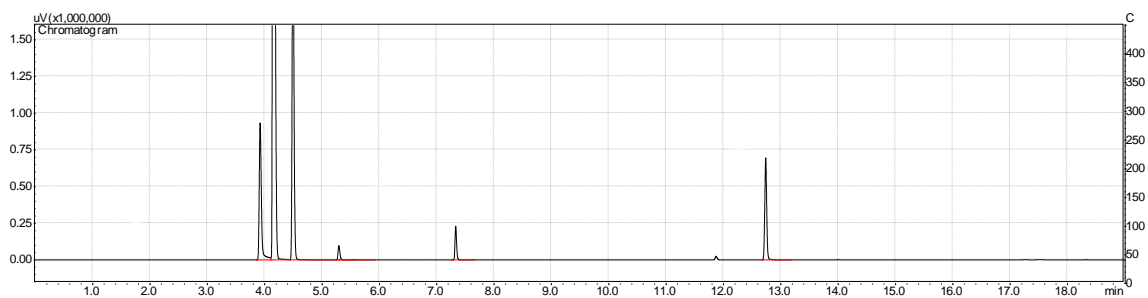

| Peak# | Ret.Time | Area       | Height    | Conc.   | Units | Mark | Compound ID# | Compound Name |
|-------|----------|------------|-----------|---------|-------|------|--------------|---------------|
| 1     | 3.920    | 2477747.7  | 925844.8  | 0.00000 |       | V    |              |               |
| 2     | 4.149    | 16526807.5 | 6019481.6 | 0.00000 | ppm   | V    | 1            |               |
| 3     | 4.492    | 5326914.5  | 2343954.5 | 0.00000 | ppm   | SV   | 1            |               |
| 4     | 5.292    | 127630.7   | 97547.4   | 0.00000 |       | T    |              |               |
| 5     | 7.330    | 444979.7   | 228464.1  | 0.00000 | ppm   | SV   | 3            |               |
| 6     | 12.736   | 1629267.6  | 685405.9  | 0.00000 |       | SV   |              |               |

L3\_Ar\_Br\_10\_RT\_12H:

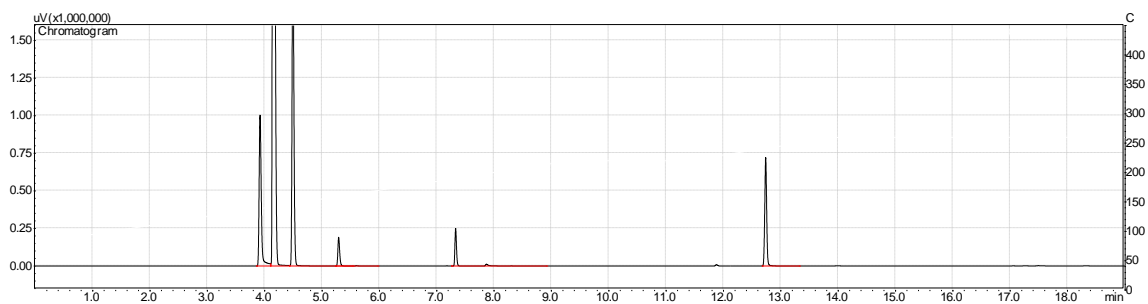

| Peak# | Ret.Time | Area       | Height    | Conc.   | Units | Mark | Compound ID# | Compound Name |
|-------|----------|------------|-----------|---------|-------|------|--------------|---------------|
| 1     | 3.918    | 2671598.3  | 1002006.8 | 0.00000 |       | V    |              |               |
| 2     | 4.148    | 16509509.4 | 6024115.1 | 0.00000 | ppm   | V    | 1            |               |
| 3     | 4.491    | 4794317.9  | 2083353.7 | 0.00000 | ppm   | SV   | 1            |               |
| 4     | 5.289    | 227483.8   | 190247.5  | 0.00000 |       | T    |              |               |
| 5     | 7.329    | 477478.4   | 248958.6  | 0.00000 | ppm   | SV   | 3            |               |
| 6     | 12.736   | 1681492.0  | 711678.3  | 0.00000 |       | SV   |              |               |

CyJohnPhos\_Ar\_Br\_10\_RT\_12H:

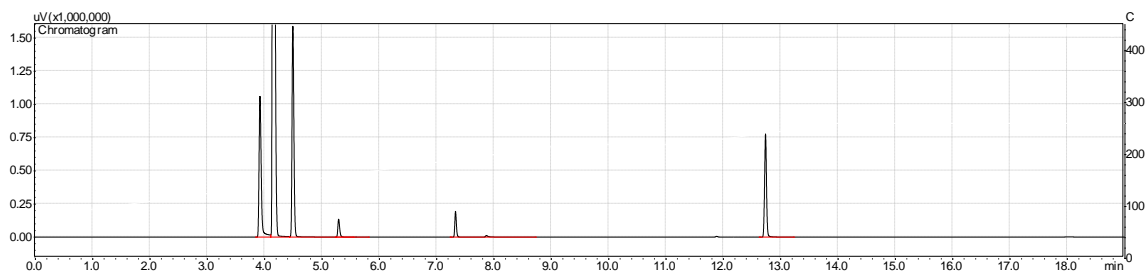

| Peak# | Ret.Time | Area       | Height    | Conc.   | Units | Mark | Compound ID# | Compound Name |
|-------|----------|------------|-----------|---------|-------|------|--------------|---------------|
| 1     | 3.918    | 2834001.1  | 1056064.2 | 0.00000 |       | V    |              |               |
| 2     | 4.147    | 16915247.6 | 6135430.1 | 0.00000 | ppm   | V    | 1            |               |
| 3     | 4.491    | 3634435.3  | 1579860.8 | 0.00000 | ppm   | SV   | 1            |               |
| 4     | 5.290    | 189190.3   | 134839.5  | 0.00000 |       | T    |              |               |
| 5     | 7.328    | 371229.9   | 192416.3  | 0.00000 | ppm   | SV   | 3            |               |
| 6     | 12.735   | 1812292.8  | 764277.3  | 0.00000 |       | V    |              |               |

JohnPhos\_Ar\_Br\_10\_RT\_12H:

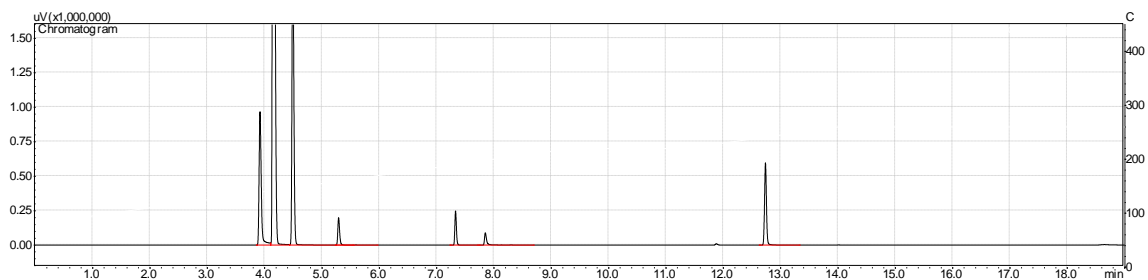

| Peak# | Ret.Time | Area       | Height    | Conc.   | Units | Mark | Compound ID# | Compound Name |
|-------|----------|------------|-----------|---------|-------|------|--------------|---------------|
| 1     | 3.919    | 2592727.1  | 964491.3  | 0.00000 |       | V    |              |               |
| 2     | 4.148    | 16486942.0 | 6013652.1 | 0.00000 | ppm   | V    | 1            |               |
| 3     | 4.490    | 5088352.2  | 2197714.3 | 0.00000 | ppm   | SV   | 1            |               |
| 4     | 5.289    | 441166.0   | 196941.8  | 0.00000 |       | T    |              |               |
| 5     | 7.329    | 471893.8   | 246539.4  | 0.00000 | ppm   | SV   | 3            |               |
| 6     | 7.848    | 254336.5   | 89113.7   | 0.00000 |       | S    |              |               |
| 7     | 12.735   | 1391576.3  | 594068.4  | 0.00000 |       | SV   |              |               |

2,4,6-Trimethyl-1,1'-biphenyl

Ar\_Br\_11\_RT\_To

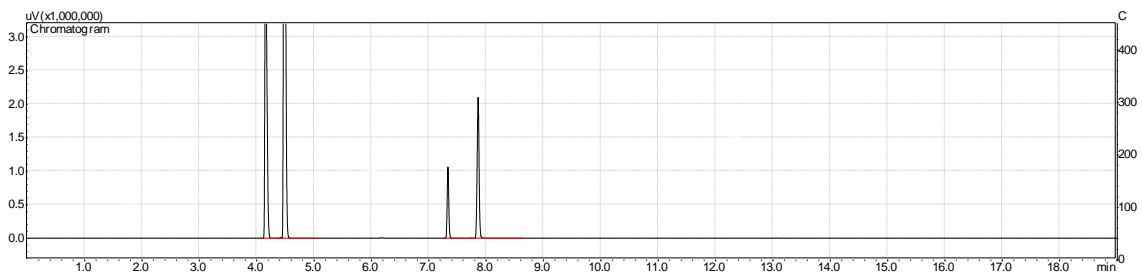

| Peak# | Ret.Time | Area       | Height    | Conc.   | Units | Mark | Compound ID# | Compound Name |
|-------|----------|------------|-----------|---------|-------|------|--------------|---------------|
| 1     | 4.154    | 11240263.0 | 4435319.0 | 0.00000 | ppm   | SV   | 1            |               |
| 2     | 4.479    | 22748401.1 | 9603548.3 | 0.00000 | ppm   | V    | 1            |               |
| 3     | 7.333    | 2017808.1  | 1048190.0 | 0.00000 | ppm   | SV   | 3            |               |
| 4     | 7.859    | 4897215.1  | 2066624.7 | 0.00000 |       | S    |              |               |

L1\_Ar\_Br\_11\_RT\_12H:

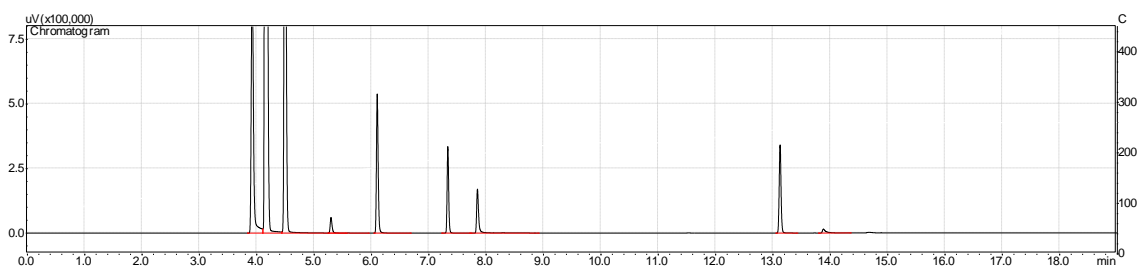

| Peak# | Ret.Time | Area       | Height    | Conc.   | Units | Mark | Compound ID# | Compound Name |
|-------|----------|------------|-----------|---------|-------|------|--------------|---------------|
| 1     | 3.920    | 2769350.6  | 1023325.8 | 0.00000 |       | V    |              |               |
| 2     | 4.149    | 16003763.0 | 5828033.2 | 0.00000 | ppm   | V    | 1            |               |
| 3     | 4.491    | 5680355.1  | 2473847.5 | 0.00000 | ppm   | SV   | 1            |               |
| 4     | 5.294    | 68286.5    | 58954.5   | 0.00000 |       | T    |              |               |
| 5     | 6.100    | 1129205.3  | 529098.2  | 0.00000 |       | S    |              |               |
| 6     | 7.331    | 633825.2   | 330681.6  | 0.00000 | ppm   | SV   | 3            |               |

|   |        |           |          |         |  |   |  |  |
|---|--------|-----------|----------|---------|--|---|--|--|
| 7 | 7.847  | 1199615.9 | 169733.6 | 0.00000 |  | S |  |  |
| 8 | 13.124 | 764825.3  | 338240.3 | 0.00000 |  |   |  |  |
| 9 | 13.880 | 69188.9   | 15130.9  | 0.00000 |  |   |  |  |

L3\_Ar\_Br\_11\_RT\_12H:

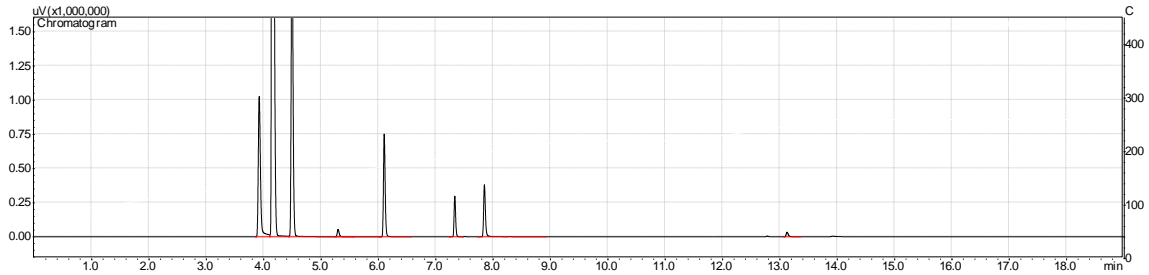

| Peak# | Ret.Time | Area       | Height    | Conc.   | Units | Mark | Compound ID# | Compound Name |
|-------|----------|------------|-----------|---------|-------|------|--------------|---------------|
| 1     | 3.921    | 2784101.9  | 1013276.6 | 0.00000 |       | V    |              |               |
| 2     | 4.150    | 16213816.7 | 5881198.7 | 0.00000 | ppm   | V    | 1            |               |
| 3     | 4.492    | 5023760.6  | 2176234.2 | 0.00000 | ppm   | SV   | 1            |               |
| 4     | 5.296    | 129259.4   | 54043.4   | 0.00000 |       | T    |              |               |
| 5     | 6.100    | 1558631.9  | 740463.6  | 0.00000 |       | SV   |              |               |
| 6     | 7.331    | 561404.3   | 295107.7  | 0.00000 | ppm   | V    | 3            |               |
| 7     | 7.847    | 3958885.4  | 377043.1  | 0.00000 |       | S    |              |               |
| 8     | 13.125   | 87664.1    | 34283.5   | 0.00000 |       |      |              |               |

CyJohnPhos\_Ar\_Br\_11\_RT\_12H:

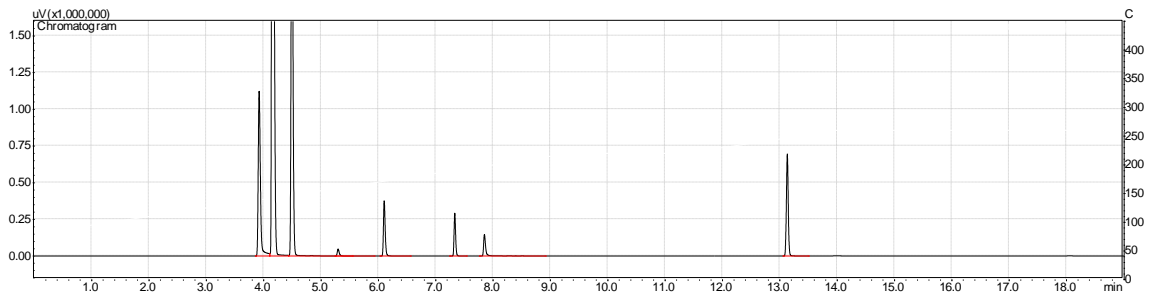

| Peak# | Ret.Time | Area       | Height    | Conc.   | Units | Mark | Compound ID# | Compound Name |
|-------|----------|------------|-----------|---------|-------|------|--------------|---------------|
| 1     | 3.920    | 3014352.4  | 1114500.9 | 0.00000 |       | V    |              |               |
| 2     | 4.151    | 14703707.8 | 5472727.9 | 0.00000 | ppm   | V    | 1            |               |
| 3     | 4.491    | 6736369.4  | 2920557.2 | 0.00000 | ppm   | SV   | 1            |               |
| 4     | 5.297    | 114930.8   | 47273.9   | 0.00000 |       | T    |              |               |
| 5     | 6.101    | 798967.6   | 372278.8  | 0.00000 |       | S    |              |               |
| 6     | 7.331    | 548295.2   | 287656.2  | 0.00000 | ppm   | V    | 3            |               |
| 7     | 7.848    | 909160.5   | 145942.8  | 0.00000 |       | S    |              |               |
| 8     | 13.130   | 1569071.6  | 692517.5  | 0.00000 |       |      |              |               |



JohnPhos\_Ar\_Br\_11\_RT\_12H:

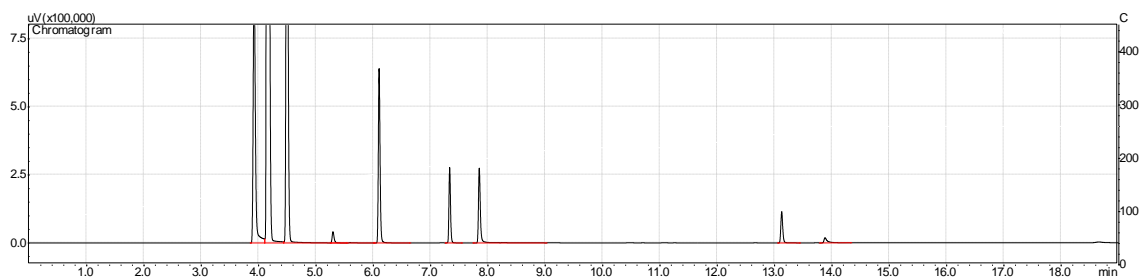

| Peak# | Ret.Time | Area       | Height    | Conc.   | Units | Mark | Compound ID# | Compound Name |
|-------|----------|------------|-----------|---------|-------|------|--------------|---------------|
| 1     | 3.921    | 2665665.2  | 983338.3  | 0.00000 |       | V    |              |               |
| 2     | 4.150    | 16055419.3 | 5850855.4 | 0.00000 | ppm   | V    | 1            |               |
| 3     | 4.492    | 5233954.1  | 2279559.4 | 0.00000 | ppm   | SV   | 1            |               |
| 4     | 5.296    | 97168.3    | 40877.2   | 0.00000 |       | T    |              |               |
| 5     | 6.101    | 1335849.3  | 633635.5  | 0.00000 |       | SV   |              |               |
| 6     | 7.332    | 525750.0   | 271822.7  | 0.00000 | ppm   | V    | 3            |               |
| 7     | 7.848    | 2949200.4  | 273503.2  | 0.00000 |       | S    |              |               |
| 8     | 13.123   | 267316.3   | 113369.7  | 0.00000 |       |      |              |               |
| 9     | 13.879   | 80404.1    | 18566.9   | 0.00000 |       | V    |              |               |

3-Phenyl-pyridine: KOH in MeOH

Ar\_Br\_52\_RT\_To

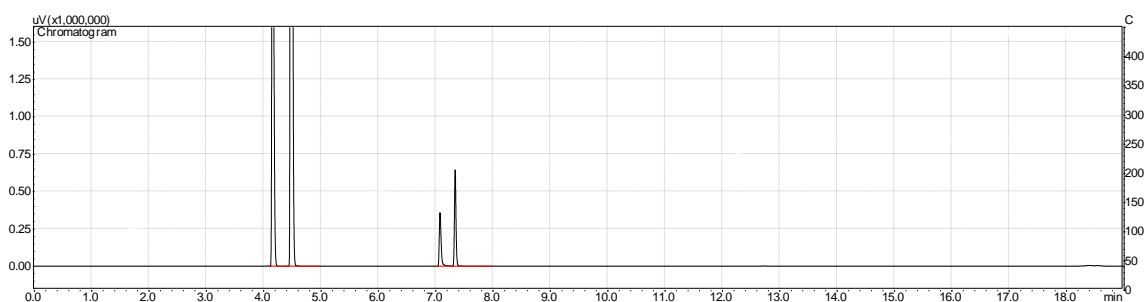

| Peak# | Ret.Time | Area       | Height     | Conc.   | Units | Mark | Compound ID# | Compound Name |
|-------|----------|------------|------------|---------|-------|------|--------------|---------------|
| 1     | 4.155    | 8378818.4  | 3742545.8  | 0.00000 | ppm   | SV   | 1            |               |
| 2     | 4.476    | 23303114.4 | 10461192.8 | 0.00000 | ppm   |      | 1            |               |
| 3     | 7.074    | 816951.0   | 355151.1   | 0.00000 | ppm   |      | 3            |               |
| 4     | 7.338    | 1216411.6  | 638908.6   | 0.00000 | ppm   | SV   | 3            |               |

L1\_Br\_52\_RT\_24H:

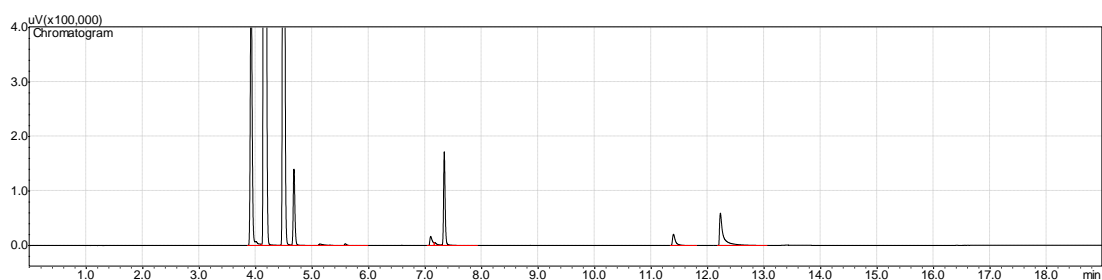

| Peak# | Ret.Time | Area       | Height    | Conc.   | Units | Mark | Compound ID# | Compound Name |
|-------|----------|------------|-----------|---------|-------|------|--------------|---------------|
| 1     | 3.918    | 1167376.3  | 514580.9  | 0.00000 |       | SV   |              |               |
| 2     | 4.149    | 12954926.7 | 5371540.3 | 0.00000 | ppm   | SV   | 1            |               |
| 3     | 4.489    | 5817923.2  | 2843343.0 | 0.00000 | ppm   | V    | 1            |               |
| 4     | 4.676    | 304132.5   | 138317.6  | 0.00000 |       | SV   |              |               |
| 5     | 5.136    | 9182.6     | 2817.8    | 0.00000 |       | T    |              |               |
| 6     | 7.097    | 89496.3    | 16946.7   | 0.00000 | ppm   |      | 3            |               |
| 7     | 7.171    | 21217.6    | 5641.7    | 0.00000 | ppm   | V    | 3            |               |
| 8     | 7.337    | 338696.8   | 168028.4  | 0.00000 | ppm   | SV   | 3            |               |
| 9     | 11.395   | 78468.6    | 20883.7   | 0.00000 |       |      |              |               |
| 10    | 12.225   | 274724.5   | 59573.0   | 0.00000 |       |      |              |               |

L3\_Ar\_Br\_52\_RT\_24H:

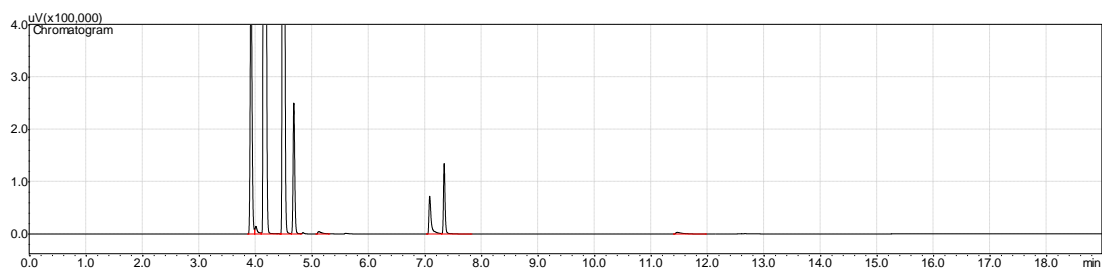

| Peak# | Ret.Time | Area       | Height    | Conc.   | Units | Mark | Compound ID# | Compound Name |
|-------|----------|------------|-----------|---------|-------|------|--------------|---------------|
| 1     | 3.916    | 1200715.6  | 539952.1  | 0.00000 |       | V    |              |               |
| 2     | 4.003    | 46907.7    | 15067.7   | 0.00000 |       | V    |              |               |
| 3     | 4.148    | 12251136.4 | 5148276.9 | 0.00000 | ppm   | SV   | 1            |               |

|   |        |           |           |         |     |   |   |  |
|---|--------|-----------|-----------|---------|-----|---|---|--|
| 4 | 4.487  | 7194563.2 | 3524313.8 | 0.00000 | ppm | V | 1 |  |
| 5 | 4.674  | 510137.9  | 249586.9  | 0.00000 |     | V |   |  |
| 6 | 5.115  | 28821.4   | 5093.6    | 0.00000 |     | V |   |  |
| 7 | 7.079  | 758797.5  | 71910.4   | 0.00000 | ppm |   | 3 |  |
| 8 | 7.335  | 870374.1  | 134021.0  | 0.00000 | ppm | V | 3 |  |
| 9 | 11.462 | 29763.1   | 3390.9    | 0.00000 |     | S |   |  |

L2 Ar\_ Br \_52\_RT\_24H:

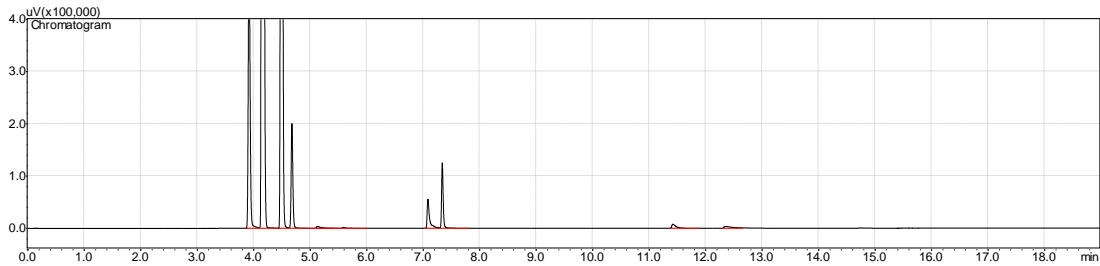

| Peak# | Ret.Time | Area       | Height    | Conc.   | Units | Mark | Compound ID# | Compound Name |
|-------|----------|------------|-----------|---------|-------|------|--------------|---------------|
| 1     | 3.917    | 1258045.3  | 554908.2  | 0.00000 |       | V    |              |               |
| 2     | 4.148    | 12562925.5 | 5221153.1 | 0.00000 | ppm   | V    | 1            |               |
| 3     | 4.488    | 6881137.8  | 3366767.3 | 0.00000 | ppm   | V    | 1            |               |
| 4     | 4.675    | 432217.0   | 199195.1  | 0.00000 |       | SV   |              |               |
| 5     | 5.126    | 22664.6    | 3572.5    | 0.00000 |       | T    |              |               |
| 6     | 7.083    | 692071.7   | 55597.8   | 0.00000 | ppm   |      | 3            |               |
| 7     | 7.337    | 852928.7   | 122599.9  | 0.00000 | ppm   | V    | 3            |               |
| 8     | 11.420   | 45625.7    | 8189.4    | 0.00000 |       |      |              |               |
| 9     | 12.352   | 41812.0    | 3641.1    | 0.00000 |       |      |              |               |

CyJohnPhos\_ Br \_52\_RT\_24H:

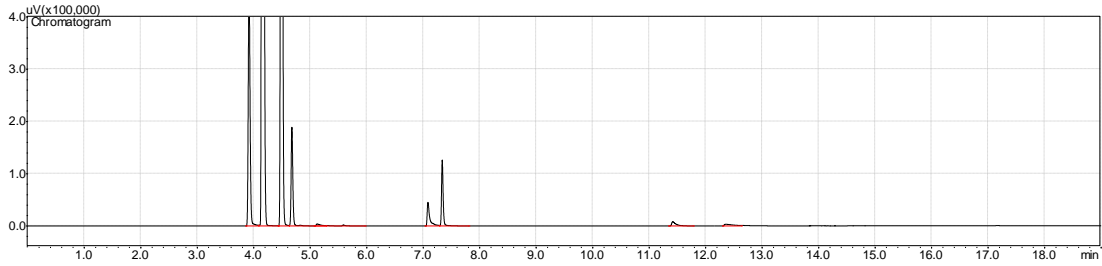

| Peak# | Ret.Time | Area       | Height    | Conc.   | Units | Mark | Compound ID# | Compound Name |
|-------|----------|------------|-----------|---------|-------|------|--------------|---------------|
| 1     | 3.917    | 1066355.2  | 469860.6  | 0.00000 |       | V    |              |               |
| 2     | 4.151    | 10125575.8 | 4403750.9 | 0.00000 | ppm   | V    | 1            |               |
| 3     | 4.488    | 5336982.9  | 2639322.7 | 0.00000 | ppm   | V    | 1            |               |
| 4     | 4.675    | 405789.2   | 188067.3  | 0.00000 |       | SV   |              |               |
| 5     | 5.123    | 20450.2    | 3745.0    | 0.00000 |       | T    |              |               |
| 6     | 7.084    | 705551.8   | 45145.7   | 0.00000 | ppm   |      | 3            |               |
| 7     | 7.336    | 854574.7   | 124371.0  | 0.00000 | ppm   | V    | 3            |               |
| 8     | 11.418   | 45723.2    | 8394.7    | 0.00000 |       |      |              |               |
| 9     | 12.357   | 39192.3    | 3418.7    | 0.00000 |       |      |              |               |

JohnPhos\_Br\_52\_RT\_24H:

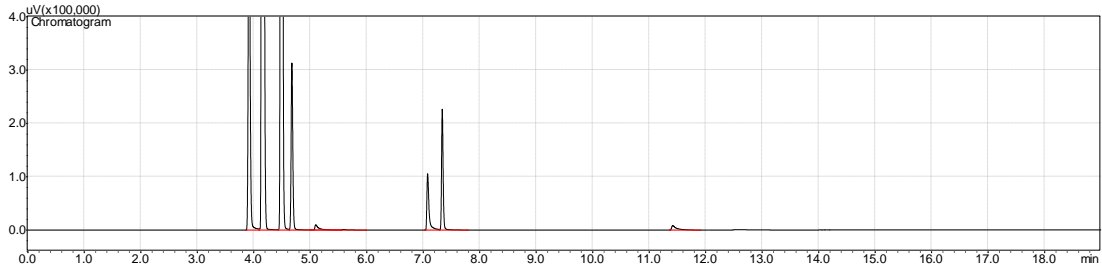

| Peak# | Ret.Time | Area       | Height    | Conc.   | Units | Mark | Compound ID# | Compound Name |
|-------|----------|------------|-----------|---------|-------|------|--------------|---------------|
| 1     | 3.917    | 1653409.2  | 726977.4  | 0.00000 |       | V    |              |               |
| 2     | 4.149    | 11823604.3 | 4949835.9 | 0.00000 | ppm   | V    | 1            |               |
| 3     | 4.487    | 8039480.3  | 3908172.9 | 0.00000 | ppm   | V    | 1            |               |
| 4     | 4.675    | 660353.8   | 311698.3  | 0.00000 |       | SV   |              |               |
| 5     | 5.097    | 45241.0    | 9798.6    | 0.00000 |       | T    |              |               |

|   |        |          |          |         |     |   |   |  |
|---|--------|----------|----------|---------|-----|---|---|--|
| 6 | 7.078  | 772018.7 | 105551.7 | 0.00000 | ppm |   | 3 |  |
| 7 | 7.337  | 942093.6 | 221669.1 | 0.00000 | ppm | V | 3 |  |
| 8 | 11.418 | 55072.1  | 8510.4   | 0.00000 |     |   |   |  |

SPhos\_Br\_52\_RT\_24H:

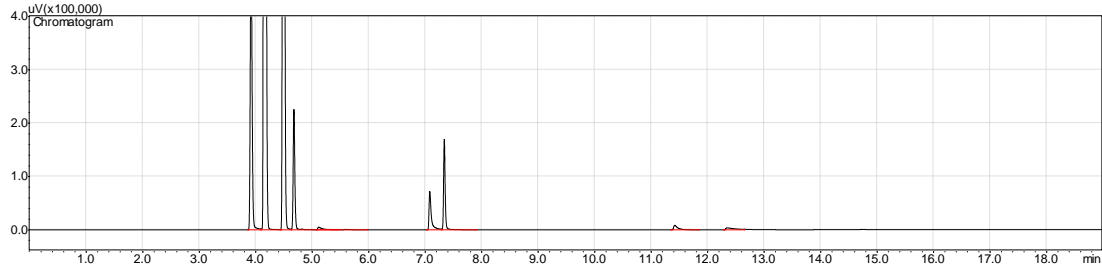

| Peak# | Ret.Time | Area       | Height    | Conc.   | Units | Mark | Compound ID# | Compound Name |
|-------|----------|------------|-----------|---------|-------|------|--------------|---------------|
| 1     | 3.917    | 1230241.3  | 544212.3  | 0.00000 |       | V    |              |               |
| 2     | 4.151    | 10885258.1 | 4664928.8 | 0.00000 | ppm   | V    | 1            |               |
| 3     | 4.488    | 6478740.9  | 3192438.6 | 0.00000 | ppm   | V    | 1            |               |
| 4     | 4.675    | 479467.8   | 224451.8  | 0.00000 |       | SV   |              |               |
| 5     | 5.115    | 28293.4    | 5019.3    | 0.00000 |       | T    |              |               |
| 6     | 7.081    | 697405.6   | 71155.1   | 0.00000 | ppm   |      | 3            |               |
| 7     | 7.337    | 938128.9   | 165769.1  | 0.00000 | ppm   | SV   | 3            |               |
| 8     | 11.418   | 46453.4    | 8633.1    | 0.00000 |       |      |              |               |
| 9     | 12.347   | 41161.2    | 3729.6    | 0.00000 |       |      |              |               |

L4\_Br\_52\_RT\_24H:

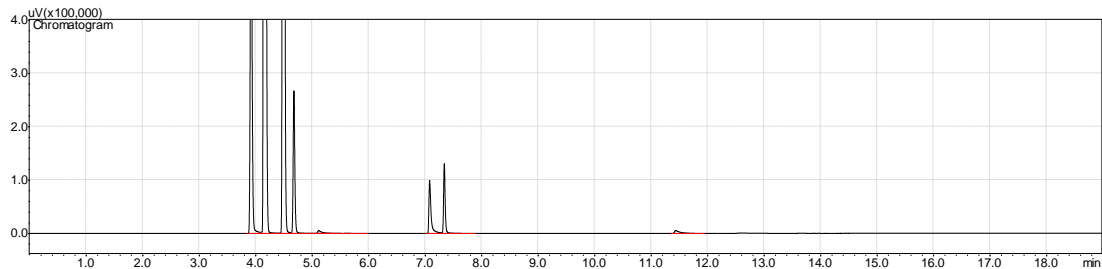

| Peak# | Ret.Time | Area | Height | Conc. | Units | Mark | Compound ID# | Compound Name |
|-------|----------|------|--------|-------|-------|------|--------------|---------------|
|-------|----------|------|--------|-------|-------|------|--------------|---------------|

|   |        |            |           |         |     |    |   |  |
|---|--------|------------|-----------|---------|-----|----|---|--|
| 1 | 3.917  | 1576214.7  | 694445.8  | 0.00000 |     | V  |   |  |
| 2 | 4.150  | 11616915.9 | 4882032.3 | 0.00000 | ppm | SV | 1 |  |
| 3 | 4.486  | 8702391.0  | 4207801.0 | 0.00000 | ppm | V  | 1 |  |
| 4 | 4.675  | 566495.7   | 266024.9  | 0.00000 |     | SV |   |  |
| 5 | 5.113  | 28888.9    | 5211.7    | 0.00000 |     | T  |   |  |
| 6 | 7.078  | 768193.6   | 99006.4   | 0.00000 | ppm |    | 3 |  |
| 7 | 7.337  | 862930.4   | 127476.3  | 0.00000 | ppm | SV | 3 |  |
| 8 | 11.435 | 40908.4    | 5519.1    | 0.00000 |     |    |   |  |

tBuDavePhos\_Br\_52\_RT\_24H:

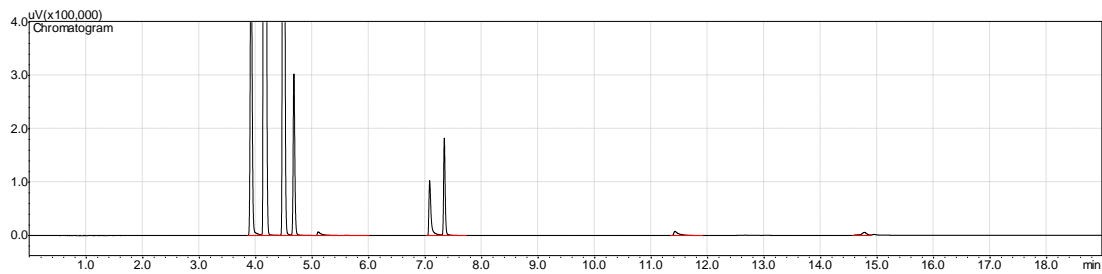

| Peak# | Ret.Time | Area       | Height    | Conc.   | Units | Mark | Compound ID# | Compound Name |
|-------|----------|------------|-----------|---------|-------|------|--------------|---------------|
| 1     | 3.917    | 1430586.6  | 630720.4  | 0.00000 |       | V    |              |               |
| 2     | 4.149    | 12518593.5 | 5204336.8 | 0.00000 | ppm   | V    | 1            |               |
| 3     | 4.489    | 6398048.6  | 3135363.1 | 0.00000 | ppm   | V    | 1            |               |
| 4     | 4.675    | 636464.0   | 300765.7  | 0.00000 |       | SV   |              |               |
| 5     | 5.106    | 34256.4    | 6772.8    | 0.00000 |       | T    |              |               |
| 6     | 7.079    | 703498.6   | 102012.4  | 0.00000 | ppm   |      | 3            |               |
| 7     | 7.338    | 855001.7   | 179719.5  | 0.00000 | ppm   | V    | 3            |               |
| 8     | 11.421   | 53125.9    | 7907.0    | 0.00000 |       |      |              |               |
| 9     | 14.775   | 41261.4    | 5752.5    | 0.00000 | ppm   | V    | 6            |               |

3-Phenyl-pyridine: KF

Ar\_Br\_52\_RT\_To

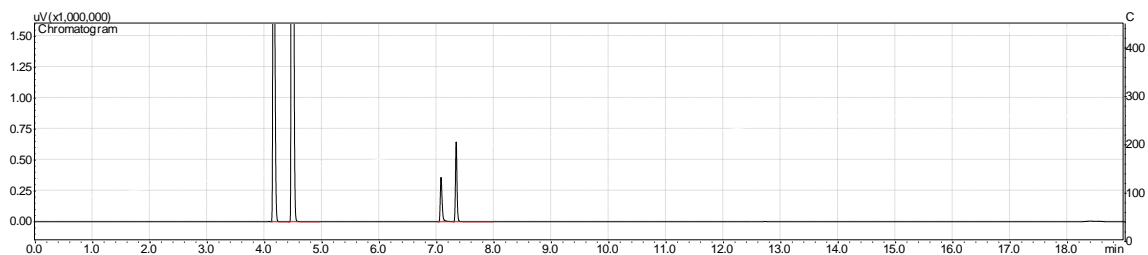

| Peak# | Ret.Time | Area       | Height     | Conc.   | Units | Mark | Compound ID# | Compound Name |
|-------|----------|------------|------------|---------|-------|------|--------------|---------------|
| 1     | 4.155    | 8378818.4  | 3742545.8  | 0.00000 | ppm   | SV   | 1            |               |
| 2     | 4.476    | 23303114.4 | 10461192.8 | 0.00000 | ppm   |      | 1            |               |
| 3     | 7.074    | 816951.0   | 355151.1   | 0.00000 | ppm   |      | 3            |               |
| 4     | 7.338    | 1216411.6  | 638908.6   | 0.00000 | ppm   | SV   | 3            |               |

L1\_Br\_52\_RT\_24H:

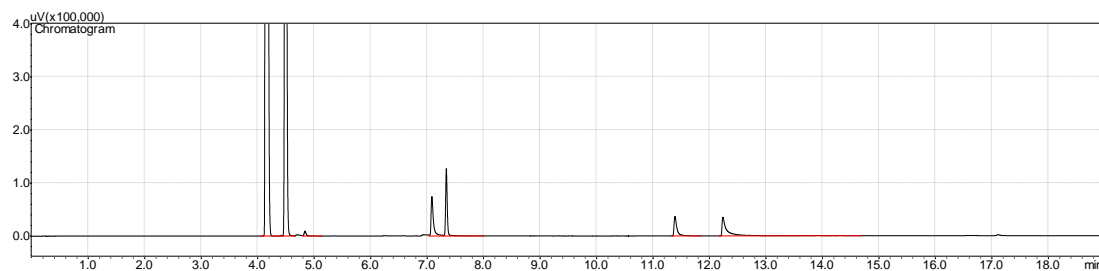

| Peak# | Ret.Time | Area       | Height    | Conc.   | Units | Mark | Compound ID# | Compound Name |
|-------|----------|------------|-----------|---------|-------|------|--------------|---------------|
| 1     | 4.148    | 13863301.7 | 5687531.2 | 0.00000 | ppm   | SV   | 1            |               |
| 2     | 4.492    | 4769558.0  | 2355502.0 | 0.00000 | ppm   | V    | 1            |               |
| 3     | 4.837    | 20322.0    | 9126.5    | 0.00000 |       | V    |              |               |
| 4     | 7.084    | 469438.1   | 74012.8   | 0.00000 | ppm   | V    | 3            |               |
| 5     | 7.340    | 254399.5   | 125718.1  | 0.00000 | ppm   | SV   | 3            |               |
| 6     | 11.389   | 131308.0   | 36695.4   | 0.00000 |       |      |              |               |
| 7     | 12.238   | 421705.2   | 35052.7   | 0.00000 |       | S    |              |               |

L3\_Ar\_Br\_52\_RT\_24H:

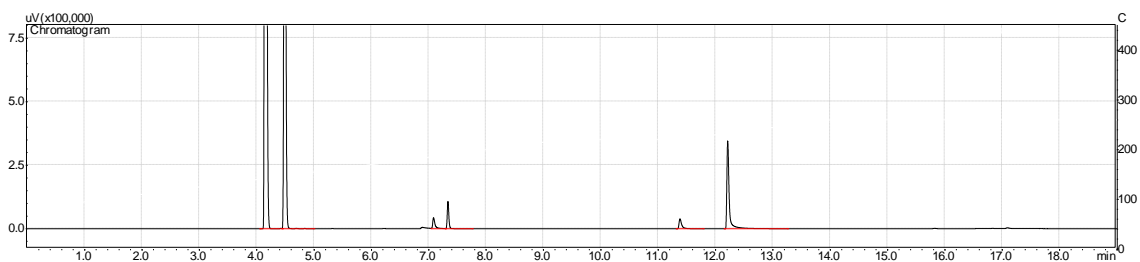

| Peak# | Ret.Time | Area       | Height    | Conc.   | Units | Mark | Compound ID# | Compound Name |
|-------|----------|------------|-----------|---------|-------|------|--------------|---------------|
| 1     | 4.147    | 12091895.8 | 5109311.7 | 0.00000 | ppm   | SV   | 1            |               |
| 2     | 4.486    | 6834493.8  | 3311921.0 | 0.00000 | ppm   | SV   | 1            |               |
| 3     | 7.083    | 72934.8    | 43644.7   | 0.00000 | ppm   | V    | 3            |               |
| 4     | 7.334    | 215595.3   | 107250.9  | 0.00000 | ppm   | V    | 3            |               |
| 5     | 11.380   | 130791.9   | 39071.2   | 0.00000 |       |      |              |               |
| 6     | 12.212   | 985128.5   | 343471.9  | 0.00000 |       |      |              |               |

L2 Ar\_Br\_52\_RT\_24H:

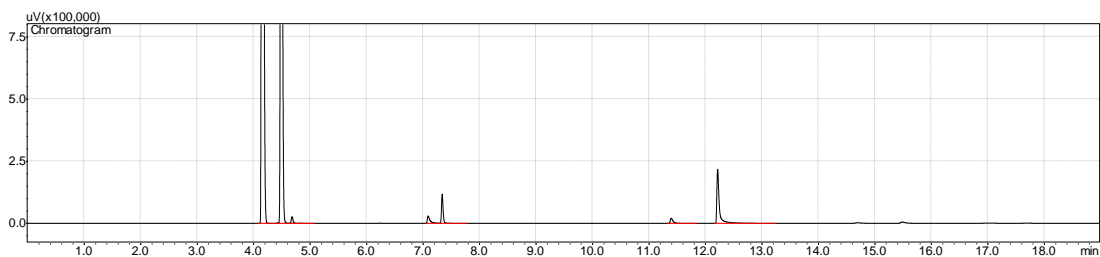

| Peak# | Ret.Time | Area       | Height    | Conc.   | Units | Mark | Compound ID# | Compound Name |
|-------|----------|------------|-----------|---------|-------|------|--------------|---------------|
| 1     | 4.146    | 14202964.4 | 5794945.3 | 0.00000 | ppm   | V    | 1            |               |
| 2     | 4.490    | 4709529.0  | 2295312.9 | 0.00000 | ppm   | SV   | 1            |               |
| 3     | 7.093    | 99251.7    | 23072.5   | 0.00000 | ppm   |      | 3            |               |
| 4     | 7.338    | 192257.5   | 91970.1   | 0.00000 | ppm   | V    | 3            |               |
| 5     | 12.224   | 283656.9   | 58366.2   | 0.00000 |       | S    |              |               |

CyJohnPhos\_Br\_52\_RT\_24H:



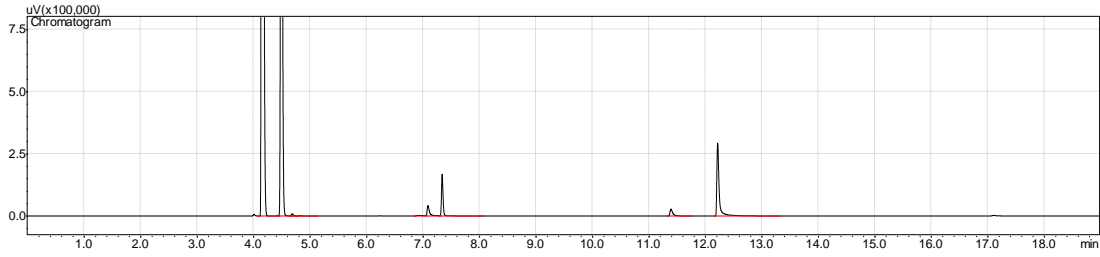

| Peak# | Ret.Time | Area       | Height    | Conc.   | Units | Mark | Compound ID# | Compound Name |
|-------|----------|------------|-----------|---------|-------|------|--------------|---------------|
| 1     | 4.148    | 13290404.1 | 5494390.8 | 0.00000 | ppm   | SV   | 1            |               |
| 2     | 4.489    | 6843114.2  | 3349648.2 | 0.00000 | ppm   | SV   | 1            |               |
| 3     | 4.681    | 21068.8    | 8675.9    | 0.00000 |       | T    |              |               |
| 4     | 6.914    | 22497.8    | 2699.9    | 0.00000 | ppm   |      | 3            |               |
| 5     | 7.086    | 87717.6    | 42222.3   | 0.00000 | ppm   | V    | 3            |               |
| 6     | 7.337    | 334850.7   | 164001.0  | 0.00000 | ppm   | SV   | 3            |               |
| 7     | 11.388   | 99791.2    | 28101.3   | 0.00000 |       |      |              |               |
| 8     | 12.215   | 857816.9   | 291700.9  | 0.00000 |       | S    |              |               |

JohnPhos\_Br\_52\_RT\_24H:

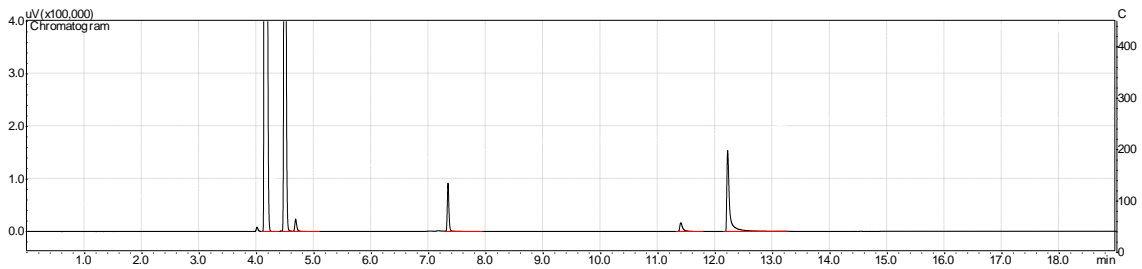

| Peak# | Ret.Time | Area       | Height    | Conc.   | Units | Mark | Compound ID# | Compound Name |
|-------|----------|------------|-----------|---------|-------|------|--------------|---------------|
| 1     | 4.147    | 14092734.2 | 5753893.4 | 0.00000 | ppm   | V    | 1            |               |
| 2     | 4.490    | 4108832.9  | 2013154.6 | 0.00000 | ppm   | V    | 1            |               |
| 3     | 4.680    | 62263.6    | 23990.5   | 0.00000 |       | SV   |              |               |
| 4     | 7.337    | 187863.9   | 90654.3   | 0.00000 | ppm   | SV   | 3            |               |
| 5     | 11.397   | 63244.9    | 16613.3   | 0.00000 |       |      |              |               |
| 6     | 12.215   | 626989.9   | 153557.2  | 0.00000 |       | S    |              |               |

SPhos\_Br\_52\_RT\_24H:

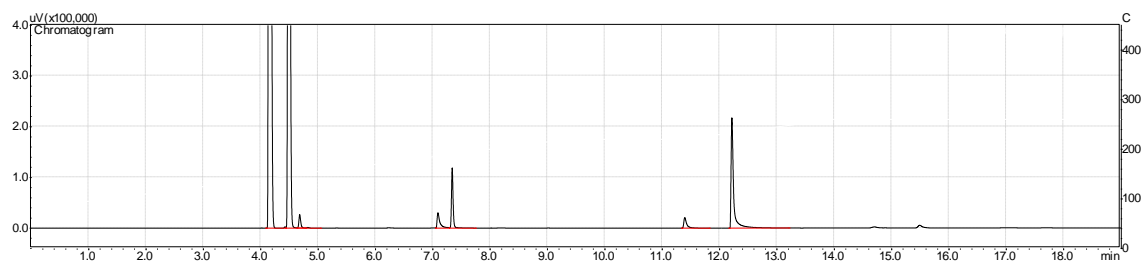

| Peak# | Ret.Time | Area       | Height    | Conc.   | Units | Mark | Compound ID# | Compound Name |
|-------|----------|------------|-----------|---------|-------|------|--------------|---------------|
| 1     | 4.149    | 12854948.4 | 5327716.6 | 0.00000 | ppm   | SV   | 1            |               |
| 2     | 4.487    | 9273548.9  | 4494399.9 | 0.00000 | ppm   | SV   | 1            |               |
| 3     | 4.679    | 56987.9    | 26171.0   | 0.00000 |       | T    |              |               |
| 4     | 7.089    | 106666.6   | 30084.3   | 0.00000 | ppm   | V    | 3            |               |
| 5     | 7.338    | 235573.7   | 116720.5  | 0.00000 | ppm   | V    | 3            |               |
| 6     | 11.393   | 75426.8    | 20698.3   | 0.00000 |       |      |              |               |
| 7     | 12.215   | 669766.0   | 215873.2  | 0.00000 |       | SV   |              |               |

Cg\_Dave\_Phos\_(L4)\_Br\_52\_RT\_24H:

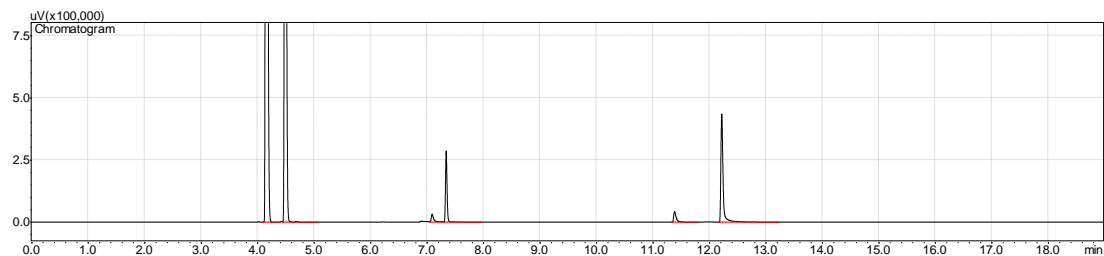

| Peak# | Ret.Time | Area       | Height    | Conc.   | Units | Mark | Compound ID# | Compound Name |
|-------|----------|------------|-----------|---------|-------|------|--------------|---------------|
| 1     | 4.149    | 12782958.9 | 5289604.8 | 0.00000 | ppm   | V    | 1            |               |
| 2     | 4.487    | 9100642.8  | 4420269.8 | 0.00000 | ppm   | SV   | 1            |               |
| 3     | 7.088    | 48111.3    | 32569.0   | 0.00000 | ppm   | V    | 3            |               |
| 4     | 7.337    | 553481.4   | 283607.6  | 0.00000 | ppm   | SV   | 3            |               |
| 5     | 11.381   | 138842.1   | 42590.0   | 0.00000 |       |      |              |               |
| 6     | 12.217   | 1188254.5  | 431571.3  | 0.00000 |       | SV   |              |               |

tBuDavePhos\_Br\_52\_RT\_24H:

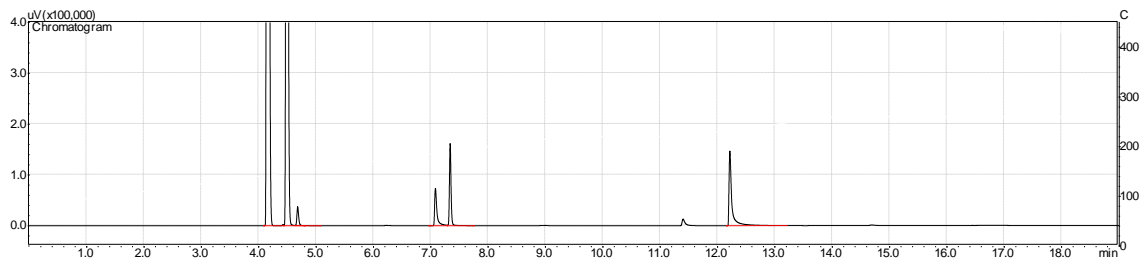

| Peak# | Ret.Time | Area       | Height    | Conc.   | Units | Mark | Compound ID# | Compound Name |
|-------|----------|------------|-----------|---------|-------|------|--------------|---------------|
| 1     | 4.148    | 13581103.0 | 5586843.9 | 0.00000 | ppm   | SV   | 1            |               |
| 2     | 4.488    | 7663607.2  | 3743538.6 | 0.00000 | ppm   | SV   | 1            |               |
| 3     | 4.679    | 77823.9    | 36487.5   | 0.00000 |       | T    |              |               |
| 4     | 7.081    | 208425.2   | 72758.8   | 0.00000 | ppm   |      | 3            |               |
| 5     | 7.338    | 315288.0   | 159726.8  | 0.00000 | ppm   | SV   | 3            |               |
| 6     | 12.215   | 704795.5   | 145862.6  | 0.00000 |       | S    |              |               |

2-Phenyl-pyridine: KOH in MeOH

Ar\_Br\_50\_RT\_To

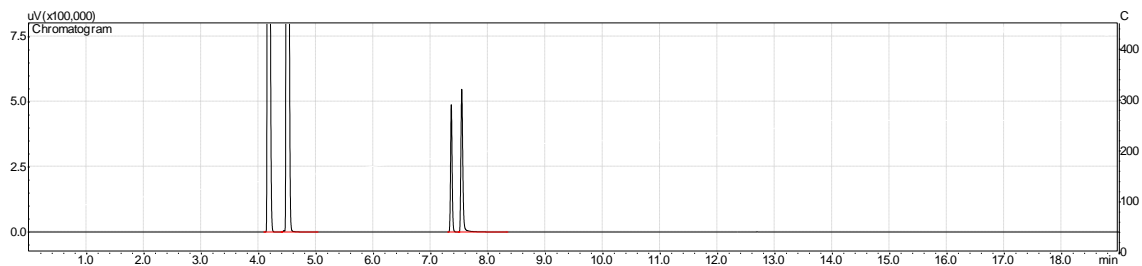

| Peak# | Ret.Time | Area       | Height    | Conc.   | Units | Mark | Compound ID# | Compound Name |
|-------|----------|------------|-----------|---------|-------|------|--------------|---------------|
| 1     | 4.164    | 12749509.2 | 5138847.4 | 0.00000 | ppm   | SV   | 1            |               |
| 2     | 4.494    | 22075436.0 | 9730688.5 | 0.00000 | ppm   | V    | 1            |               |
| 3     | 7.356    | 934864.6   | 480970.6  | 0.00000 |       | V    |              |               |
| 4     | 7.539    | 1298336.5  | 543467.1  | 0.00000 |       | SV   |              |               |

L1\_Br\_50\_RT\_24H:

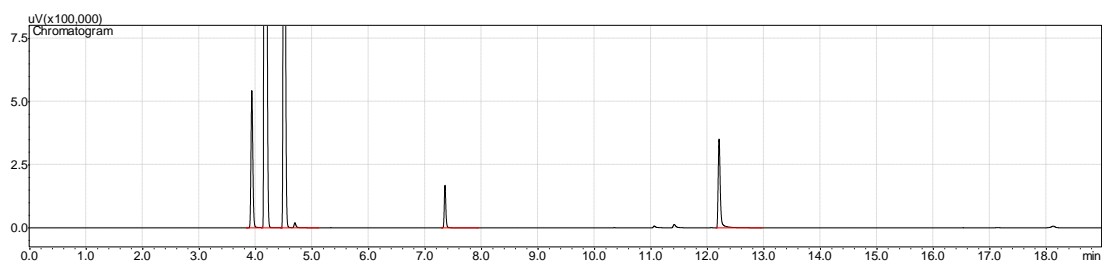

| Peak# | Ret.Time | Area       | Height    | Conc.   | Units | Mark | Compound ID# | Compound Name |
|-------|----------|------------|-----------|---------|-------|------|--------------|---------------|
| 1     | 3.932    | 1237031.1  | 540822.3  | 0.00000 |       |      |              |               |
| 2     | 4.160    | 16150780.6 | 6269489.0 | 0.00000 | ppm   | SV   |              |               |
| 3     | 4.503    | 8736798.5  | 4099498.5 | 0.00000 | ppm   | SV   |              |               |
| 4     | 7.351    | 329617.5   | 166602.6  | 0.00000 |       | SV   |              |               |
| 5     | 12.204   | 934425.7   | 348423.8  | 0.00000 |       | SV   |              |               |

L3\_Ar\_Br\_50\_RT\_24H:

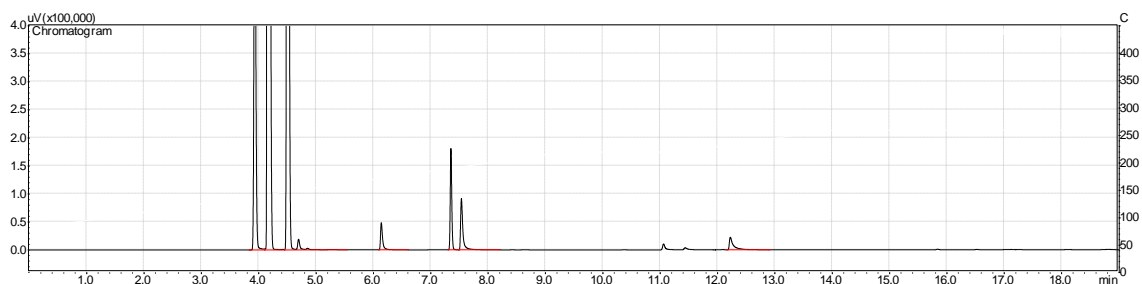

| Peak# | Ret.Time | Area       | Height    | Conc.   | Units | Mark | Compound ID# | Compound Name |
|-------|----------|------------|-----------|---------|-------|------|--------------|---------------|
| 1     | 3.931    | 1664772.6  | 724038.3  | 0.00000 |       |      |              |               |
| 2     | 4.161    | 15899245.0 | 6187489.5 | 0.00000 | ppm   | SV   | 1            |               |
| 3     | 4.503    | 8453083.5  | 3957020.2 | 0.00000 | ppm   | SV   | 1            |               |
| 4     | 6.137    | 223784     | 47846.6   | 0.00000 |       | S    |              |               |
| 5     | 7.351    | 334255.3   | 176805.2  | 0.00000 |       |      |              |               |
| 6     | 7.534    | 350960.2   | 90320.5   | 0.00000 |       | V    |              |               |
| 7     | 12.223   | 114726.3   | 22339.7   | 0.00000 |       | SV   |              |               |

L2 Ar\_Br\_50\_RT\_24H:

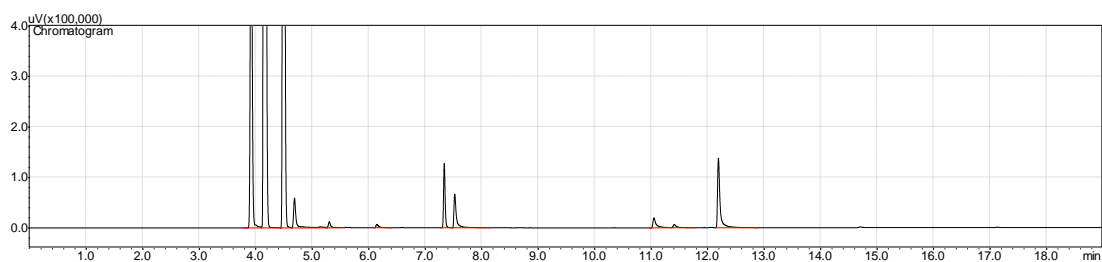

| Peak# | Ret.Time | Area       | Height    | Conc.   | Units | Mark | Compound ID# | Compound Name |
|-------|----------|------------|-----------|---------|-------|------|--------------|---------------|
| 1     | 3.918    | 1868288.9  | 810102.3  | 0.00000 |       |      |              |               |
| 2     | 4.149    | 13339191.9 | 5419793.9 | 0.00000 | ppm   | SV   | 1            |               |
| 3     | 4.489    | 7877255.7  | 3760375.7 | 0.00000 | ppm   | V    | 1            |               |
| 4     | 4.685    | 192800.5   | 58358.2   | 0.00000 |       | SV   |              |               |
| 5     | 5.301    | 14799.7    | 12118.0   | 0.00000 |       | V    |              |               |
| 6     | 6.143    | 24799.7    | 6776.0    | 0.00000 |       |      |              |               |
| 7     | 7.337    | 242725.3   | 124230.1  | 0.00000 | ppm   |      | 3            |               |
| 8     | 7.522    | 203327.1   | 66429.9   | 0.00000 |       | V    |              |               |
| 9     | 11.048   | 83700.2    | 19869.1   | 0.00000 |       |      |              |               |
| 10    | 11.408   | 28947.1    | 6431.1    | 0.00000 |       | V    |              |               |
| 11    | 12.190   | 426545.6   | 135963.3  | 0.00000 |       | SV   |              |               |

PPh3\_Ar\_Br\_50\_RT\_24H:

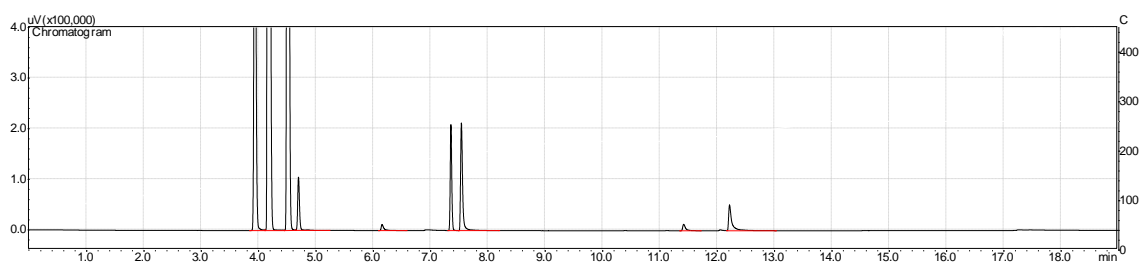

| Peak# | Ret.Time | Area       | Height    | Conc.   | Units | Mark | Compound ID# | Compound Name |
|-------|----------|------------|-----------|---------|-------|------|--------------|---------------|
| 1     | 3.934    | 2340978.3  | 1009462.0 | 0.00000 |       |      |              |               |
| 2     | 4.165    | 14809355.8 | 5858812.0 | 0.00000 | ppm   | SV   | 1            |               |

|   |        |           |           |         |     |    |   |  |
|---|--------|-----------|-----------|---------|-----|----|---|--|
| 3 | 4.507  | 9327458.2 | 4388963.5 | 0.00000 | ppm | V  | 1 |  |
| 4 | 4.695  | 238355.4  | 104357.0  | 0.00000 |     | SV |   |  |
| 5 | 6.153  | 41440.7   | 12248.8   | 0.00000 |     | S  |   |  |
| 6 | 7.354  | 390811.0  | 207736.7  | 0.00000 |     | V  |   |  |
| 7 | 7.536  | 522731.3  | 211249.6  | 0.00000 |     | V  |   |  |
| 8 | 11.414 | 47458.5   | 13160.8   | 0.00000 |     |    |   |  |
| 9 | 12.214 | 209278.4  | 50785.7   | 0.00000 |     | SV |   |  |

CyJohnPhos\_Br\_50\_RT\_24H:

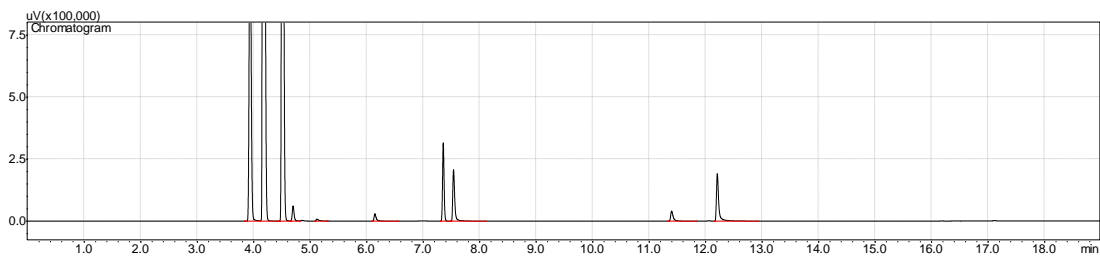

| Peak# | Ret.Time | Area       | Height    | Conc.   | Units | Mark | Compound ID# | Compound Name |
|-------|----------|------------|-----------|---------|-------|------|--------------|---------------|
| 1     | 3.934    | 3528602.0  | 1506177.0 | 0.00000 |       |      |              |               |
| 2     | 4.167    | 13789579.9 | 5505525.6 | 0.00000 | ppm   | SV   | 1            |               |
| 3     | 4.507    | 9663513.2  | 4519423.2 | 0.00000 | ppm   | V    | 1            |               |
| 4     | 4.695    | 144586.1   | 60986.1   | 0.00000 |       | V    |              |               |
| 5     | 5.117    | 33708.3    | 8429.0    | 0.00000 |       | V    |              |               |
| 6     | 6.144    | 82236.9    | 29712.3   | 0.00000 |       | S    |              |               |
| 7     | 7.354    | 589074.7   | 312758.7  | 0.00000 |       | V    |              |               |
| 8     | 7.537    | 503835.1   | 205863.4  | 0.00000 |       | V    |              |               |
| 9     | 11.397   | 130481.2   | 40747.7   | 0.00000 |       | S    |              |               |
| 10    | 12.206   | 552477.9   | 190449.1  | 0.00000 |       | V    |              |               |

JohnPhos\_Br\_50\_RT\_24H:

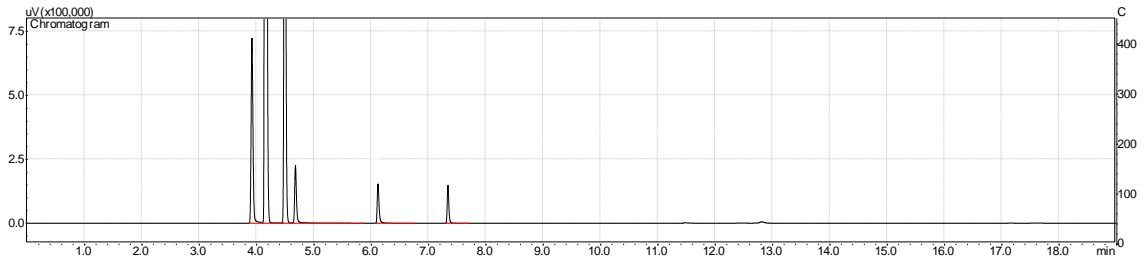

| Peak# | Ret.Time | Area       | Height    | Conc.   | Units | Mark | Compound ID# | Compound Name |
|-------|----------|------------|-----------|---------|-------|------|--------------|---------------|
| 1     | 3.918    | 1660098.6  | 719882.7  | 0.00000 |       | V    |              |               |
| 2     | 4.149    | 12988701.4 | 5360033.4 | 0.00000 | ppm   | SV   | 1            |               |
| 3     | 4.490    | 5384433.9  | 2631220.1 | 0.00000 | ppm   | V    | 1            |               |
| 4     | 4.676    | 552172.2   | 223501.4  | 0.00000 |       | SV   |              |               |
| 5     | 6.116    | 353086.4   | 153048.5  | 0.00000 |       | S    |              |               |
| 6     | 7.337    | 293423.2   | 146991.3  | 0.00000 | ppm   | S    | 3            |               |

SPhos\_Br\_50\_RT\_24H:

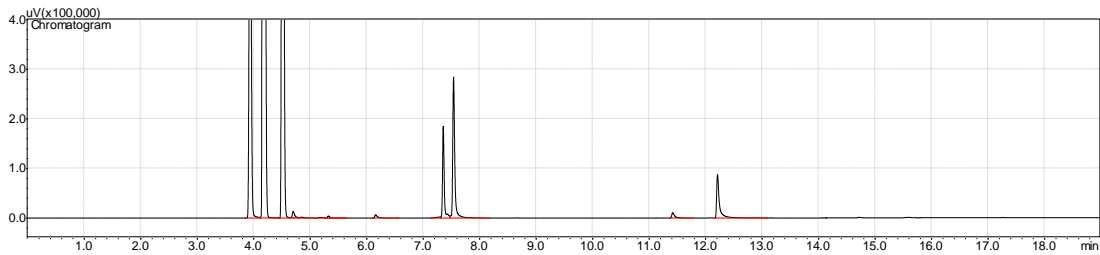

| Peak# | Ret.Time | Area       | Height    | Conc.   | Units | Mark | Compound ID# | Compound Name |
|-------|----------|------------|-----------|---------|-------|------|--------------|---------------|
| 1     | 3.935    | 2615806.0  | 1123943.0 | 0.00000 |       |      |              |               |
| 2     | 4.165    | 15120229.8 | 5945167.2 | 0.00000 | ppm   | SV   | 1            |               |
| 3     | 4.508    | 7790861.4  | 3652017.8 | 0.00000 | ppm   | SV   | 1            |               |
| 4     | 4.699    | 35845.4    | 12962.0   | 0.00000 |       | T    |              |               |
| 5     | 5.322    | 12258.0    | 4229.7    | 0.00000 |       | TV   |              |               |
| 6     | 6.158    | 24348.7    | 6708.5    | 0.00000 |       | S    |              |               |
| 7     | 7.293    | 12941.8    | 2302.6    | 0.00000 | ppm   | V    | 3            |               |
| 8     | 7.354    | 383184.6   | 183001.0  | 0.00000 |       | SV   |              |               |

|    |        |          |          |         |  |    |  |  |
|----|--------|----------|----------|---------|--|----|--|--|
| 9  | 7.537  | 707498.9 | 280415.8 | 0.00000 |  | V  |  |  |
| 10 | 11.418 | 41319.6  | 10961.8  | 0.00000 |  | S  |  |  |
| 11 | 12.209 | 300287.2 | 86737.2  | 0.00000 |  | SV |  |  |

L4\_Br\_50\_RT\_24H:

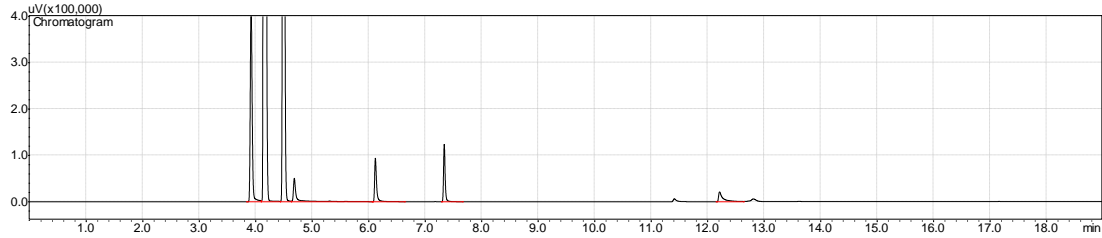

| Peak# | Ret.Time | Area       | Height    | Conc.   | Units | Mark | Compound ID# | Compound Name |
|-------|----------|------------|-----------|---------|-------|------|--------------|---------------|
| 1     | 3.918    | 1003120.7  | 433680.2  | 0.00000 |       |      |              |               |
| 2     | 4.148    | 13297316.3 | 5487253.7 | 0.00000 | ppm   | SV   | 1            |               |
| 3     | 4.489    | 5790556.3  | 2839028.1 | 0.00000 | ppm   | V    | 1            |               |
| 4     | 4.682    | 210504.1   | 50500.9   | 0.00000 |       | SV   |              |               |
| 5     | 6.117    | 226859.0   | 93127.2   | 0.00000 |       | SV   |              |               |
| 6     | 7.336    | 246676.2   | 121646.7  | 0.00000 | ppm   | S    | 3            |               |
| 7     | 12.211   | 116735.0   | 21164.5   | 0.00000 |       |      |              |               |

tBuDavePhos\_Br\_50\_RT\_24H:

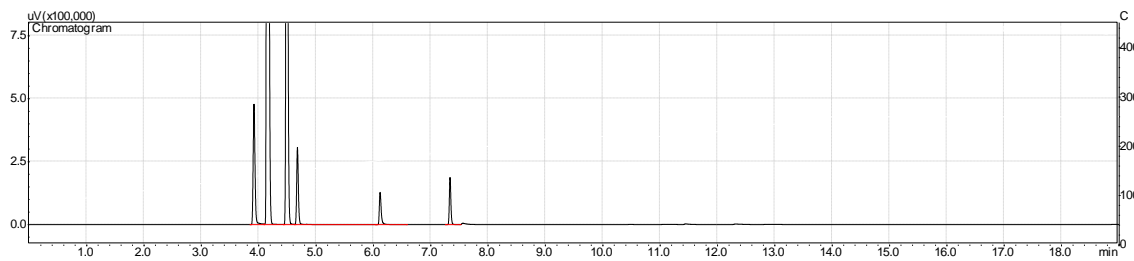

| Peak# | Ret.Time | Area       | Height    | Conc.   | Units | Mark | Compound ID# | Compound Name |
|-------|----------|------------|-----------|---------|-------|------|--------------|---------------|
| 1     | 3.917    | 1090132.8  | 473588.4  | 0.00000 |       |      |              |               |
| 2     | 4.148    | 12938947.1 | 5368811.9 | 0.00000 | ppm   | SV   | 1            |               |



|   |       |           |           |         |     |    |   |  |
|---|-------|-----------|-----------|---------|-----|----|---|--|
| 3 | 4.488 | 6645564.7 | 3257025.8 | 0.00000 | ppm | V  | 1 |  |
| 4 | 4.675 | 656338.9  | 305165.5  | 0.00000 |     | SV |   |  |
| 5 | 6.116 | 295784.7  | 127851.6  | 0.00000 |     | SV |   |  |
| 6 | 7.336 | 350804.7  | 185294.5  | 0.00000 | ppm | V  | 3 |  |

2-Phenyl-pyridine: KF

Ar\_Br\_50\_RT\_To

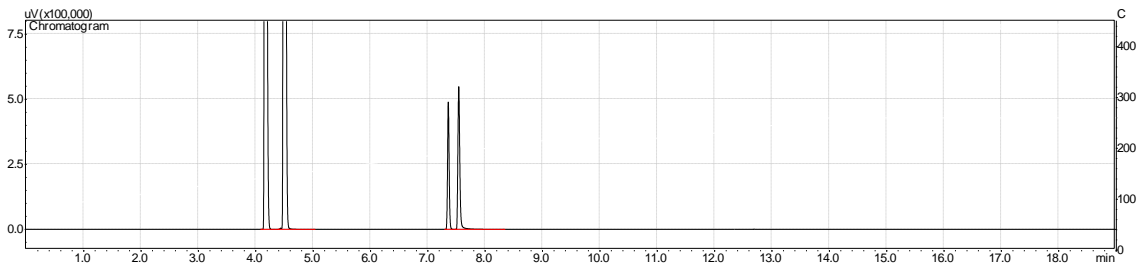

| Peak# | Ret.Time | Area       | Height    | Conc.   | Units | Mark | Compound ID# | Compound Name |
|-------|----------|------------|-----------|---------|-------|------|--------------|---------------|
| 1     | 4.164    | 12749509.2 | 5138847.4 | 0.00000 | ppm   | SV   | 1            |               |
| 2     | 4.494    | 22075436.0 | 9730688.5 | 0.00000 | ppm   | V    | 1            |               |
| 3     | 7.356    | 934864.6   | 480970.6  | 0.00000 |       | V    |              |               |
| 4     | 7.539    | 1298336.5  | 543467.1  | 0.00000 |       | SV   |              |               |

L1\_Br\_50\_RT\_24H:

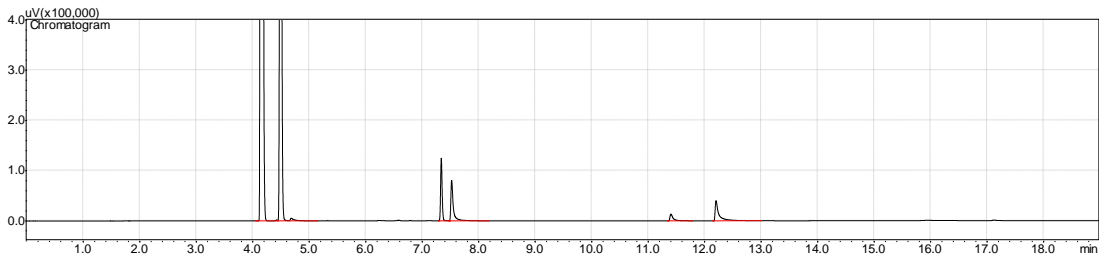

| Peak# | Ret.Time | Area       | Height    | Conc.   | Units | Mark | Compound ID# | Compound Name |
|-------|----------|------------|-----------|---------|-------|------|--------------|---------------|
| 1     | 4.146    | 13816055.8 | 5664674.5 | 0.00000 | ppm   | SV   | 1            |               |
| 2     | 4.490    | 4331390.3  | 2129564.7 | 0.00000 | ppm   | SV   | 1            |               |
| 3     | 7.337    | 230553.2   | 121432.5  | 0.00000 | ppm   |      | 3            |               |

|   |        |          |         |         |  |   |  |  |
|---|--------|----------|---------|---------|--|---|--|--|
| 4 | 7.521  | 737973.6 | 80158.8 | 0.00000 |  | V |  |  |
| 5 | 12.202 | 187856.7 | 39842.0 | 0.00000 |  |   |  |  |

L3\_Ar\_Br\_50\_RT\_24H:

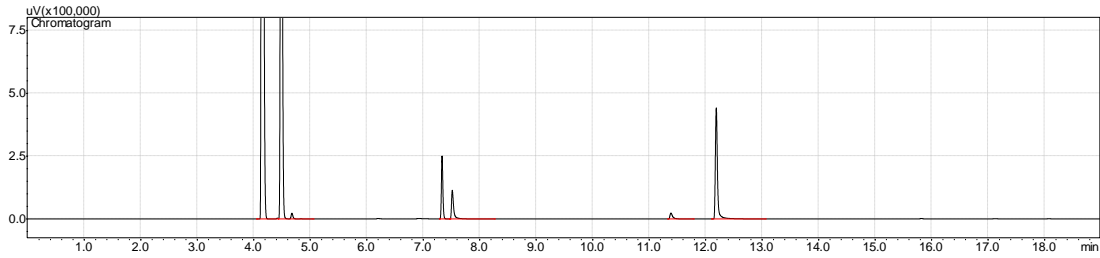

| Peak# | Ret.Time | Area       | Height    | Conc.   | Units | Mark | Compound ID# | Compound Name |
|-------|----------|------------|-----------|---------|-------|------|--------------|---------------|
| 1     | 4.145    | 13075431.5 | 5396376.2 | 0.00000 | ppm   | SV   | 1            |               |
| 2     | 4.484    | 7869206.7  | 3828369.2 | 0.00000 | ppm   | SV   | 1            |               |
| 3     | 7.333    | 462657.7   | 247637.3  | 0.00000 | ppm   | V    | 3            |               |
| 4     | 7.514    | 310892.8   | 113392.1  | 0.00000 |       | SV   |              |               |
| 5     | 11.384   | 82785.4    | 23891.9   | 0.00000 |       |      |              |               |
| 6     | 12.187   | 1159288.4  | 440695.1  | 0.00000 |       |      |              |               |

L2\_Ar\_Br\_50\_RT\_24H:

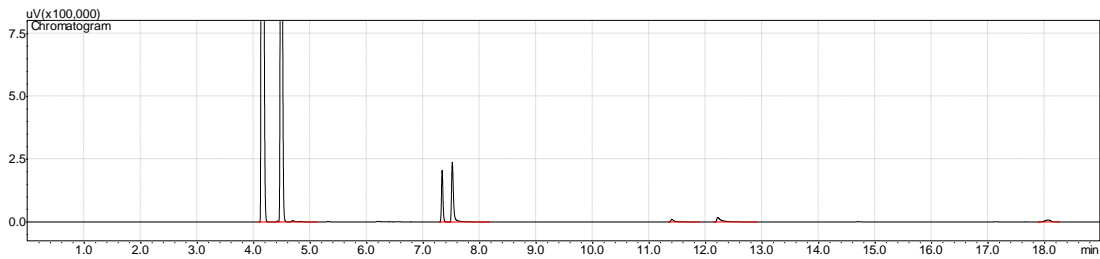

| Peak# | Ret.Time | Area       | Height    | Conc.   | Units | Mark | Compound ID# | Compound Name |
|-------|----------|------------|-----------|---------|-------|------|--------------|---------------|
| 1     | 4.145    | 13283579.2 | 5467026.7 | 0.00000 | ppm   | SV   | 1            |               |
| 2     | 4.485    | 8155487.6  | 3962491.7 | 0.00000 | ppm   | SV   | 1            |               |
| 3     | 7.335    | 379466.3   | 204795.6  | 0.00000 | ppm   |      | 3            |               |
| 4     | 7.515    | 576678.1   | 235011.9  | 0.00000 |       | V    |              |               |

|   |        |          |         |         |     |  |   |  |
|---|--------|----------|---------|---------|-----|--|---|--|
| 5 | 11.401 | 50832.3  | 10757.0 | 0.00000 |     |  |   |  |
| 6 | 12.213 | 107819.3 | 17897.6 | 0.00000 |     |  |   |  |
| 7 | 18.063 | 51004.5  | 7494.3  | 0.00000 | ppm |  | 8 |  |

PPh3\_Ar\_Br\_50\_RT\_24H:

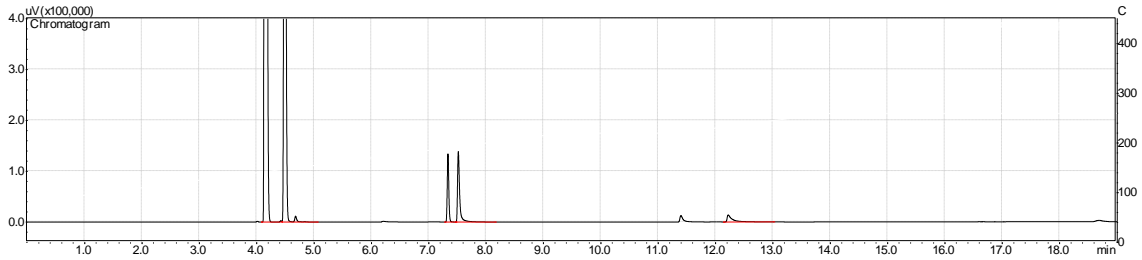

| Peak# | Ret.Time | Area       | Height    | Conc.   | Units | Mark | Compound ID# | Compound Name |
|-------|----------|------------|-----------|---------|-------|------|--------------|---------------|
| 1     | 4.145    | 13695550.9 | 5591132.8 | 0.00000 | ppm   | SV   | 1            |               |
| 2     | 4.487    | 5633231.0  | 2765452.8 | 0.00000 | ppm   | SV   | 1            |               |
| 3     | 7.334    | 249318.4   | 132962.8  | 0.00000 | ppm   | V    | 3            |               |
| 4     | 7.515    | 1161951.1  | 136312.9  | 0.00000 |       | V    |              |               |
| 5     | 12.221   | 91397.8    | 13711.5   | 0.00000 |       | S    |              |               |

CyJohnPhos\_Br\_50\_RT\_24H:

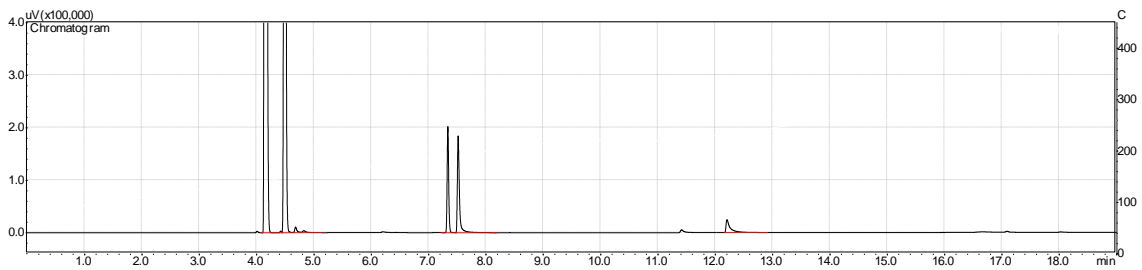

| Peak# | Ret.Time | Area       | Height    | Conc.   | Units | Mark | Compound ID# | Compound Name |
|-------|----------|------------|-----------|---------|-------|------|--------------|---------------|
| 1     | 4.145    | 13543283.2 | 5530185.3 | 0.00000 | ppm   | SV   | 1            |               |
| 2     | 4.486    | 6519466.5  | 3167064.6 | 0.00000 | ppm   | SV   | 1            |               |
| 3     | 7.334    | 373807.6   | 200408.3  | 0.00000 | ppm   | V    | 3            |               |

|   |        |           |          |         |  |    |  |  |
|---|--------|-----------|----------|---------|--|----|--|--|
| 4 | 7.514  | 1008426.6 | 181389.1 | 0.00000 |  | V  |  |  |
| 5 | 12.204 | 131024.6  | 24720.2  | 0.00000 |  | SV |  |  |

JohnPhos\_Br\_50\_RT\_24H:

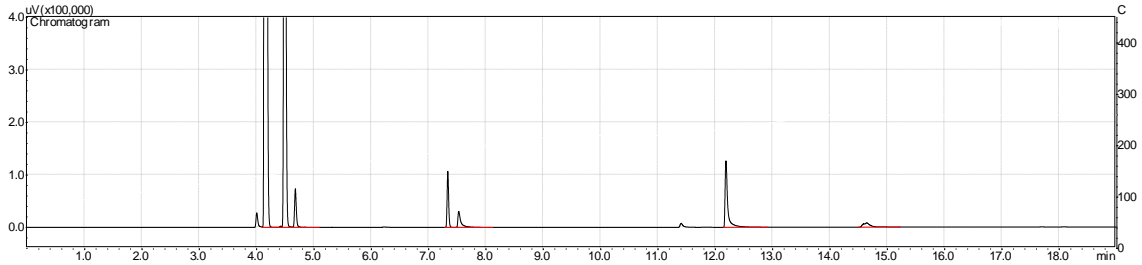

| Peak# | Ret.Time | Area       | Height    | Conc.   | Units | Mark | Compound ID# | Compound Name |
|-------|----------|------------|-----------|---------|-------|------|--------------|---------------|
| 1     | 4.145    | 14138157.3 | 5738984.6 | 0.00000 | ppm   | SV   | 1            |               |
| 2     | 4.487    | 5114803.8  | 2526992.3 | 0.00000 | ppm   | V    | 1            |               |
| 3     | 4.675    | 131442.8   | 73540.0   | 0.00000 |       | SV   |              |               |
| 4     | 7.334    | 199426.4   | 105897.6  | 0.00000 | ppm   | V    | 3            |               |
| 5     | 7.525    | 134317.2   | 30411.2   | 0.00000 |       | SV   |              |               |
| 6     | 12.185   | 405313.4   | 124965.1  | 0.00000 |       | S    |              |               |
| 7     | 14.639   | 73910.7    | 8332.1    | 0.00000 | ppm   | S    | 6            |               |

SPhos\_Br\_50\_RT\_24H:

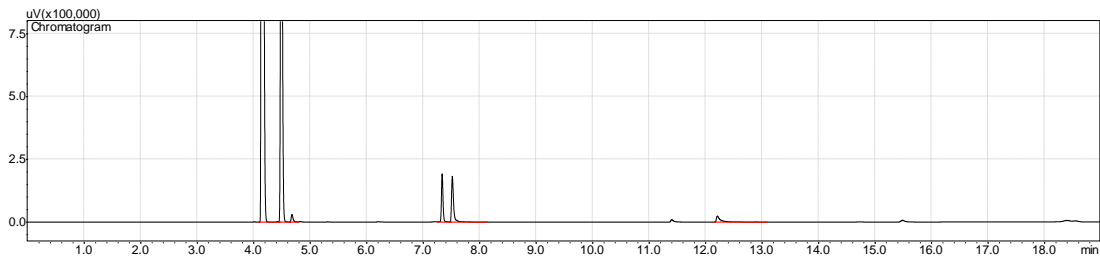

| Peak# | Ret.Time | Area       | Height    | Conc.   | Units | Mark | Compound ID# | Compound Name |
|-------|----------|------------|-----------|---------|-------|------|--------------|---------------|
| 1     | 4.145    | 13820169.8 | 5619015.1 | 0.00000 | ppm   | SV   | 1            |               |
| 2     | 4.488    | 5180878.9  | 2556052.2 | 0.00000 | ppm   | V    | 1            |               |
| 3     | 4.676    | 75068.1    | 30433.6   | 0.00000 |       | V    |              |               |

|   |        |           |          |         |     |   |   |  |
|---|--------|-----------|----------|---------|-----|---|---|--|
| 4 | 7.335  | 373904.0  | 191643.5 | 0.00000 | ppm | V | 3 |  |
| 5 | 7.515  | 1059808.9 | 180030.2 | 0.00000 |     | V |   |  |
| 6 | 12.206 | 128773.1  | 24051.4  | 0.00000 |     | S |   |  |

L4\_Br\_50\_RT\_24H:

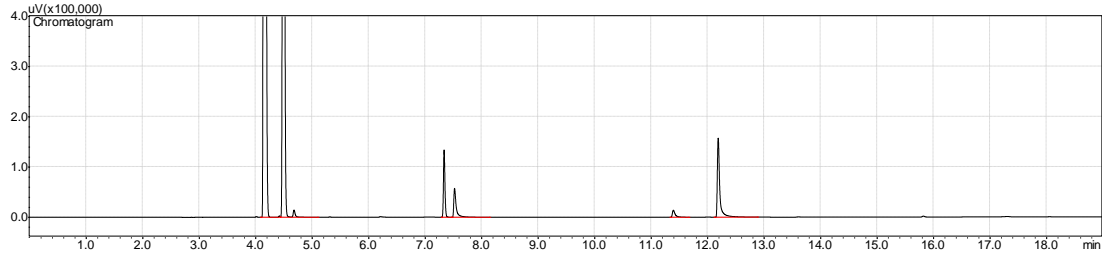

| Peak# | Ret.Time | Area       | Height    | Conc.   | Units | Mark | Compound ID# | Compound Name |
|-------|----------|------------|-----------|---------|-------|------|--------------|---------------|
| 1     | 4.148    | 12337159.9 | 5190833.4 | 0.00000 | ppm   | SV   | 1            |               |
| 2     | 4.487    | 6229033.3  | 3061932.9 | 0.00000 | ppm   | SV   | 1            |               |
| 3     | 7.334    | 246794.6   | 132846.7  | 0.00000 | ppm   |      | 3            |               |
| 4     | 7.520    | 119795.7   | 56956.3   | 0.00000 |       |      |              |               |
| 5     | 12.186   | 472042.2   | 156118.8  | 0.00000 |       | V    |              |               |

tBuDavePhos\_Br\_50\_RT\_24H:

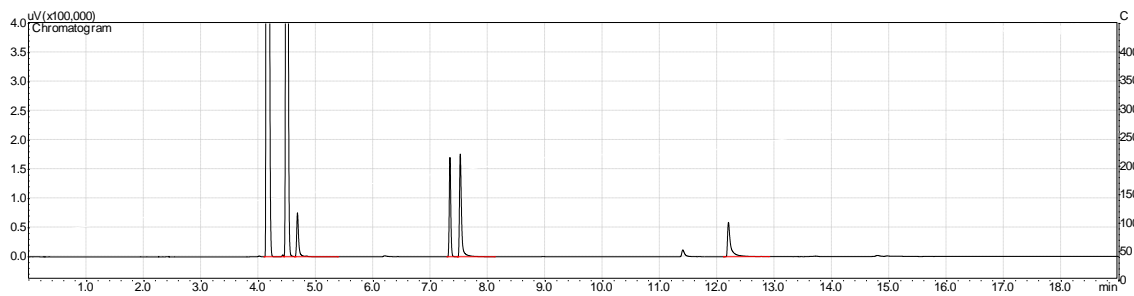

| Peak# | Ret.Time | Area       | Height    | Conc.   | Units | Mark | Compound ID# | Compound Name |
|-------|----------|------------|-----------|---------|-------|------|--------------|---------------|
| 1     | 4.147    | 13077859.3 | 5427697.3 | 0.00000 | ppm   | SV   | 1            |               |
| 2     | 4.487    | 6855067.4  | 3356100.9 | 0.00000 | ppm   | V    | 1            |               |
| 3     | 4.676    | 157405.8   | 74744.4   | 0.00000 |       | SV   |              |               |

|   |        |          |          |         |     |    |   |  |
|---|--------|----------|----------|---------|-----|----|---|--|
| 4 | 7.335  | 513272.6 | 168675.3 | 0.00000 | ppm |    | 3 |  |
| 5 | 7.516  | 528699.5 | 174550.6 | 0.00000 |     | SV |   |  |
| 6 | 12.193 | 329215.2 | 58755.7  | 0.00000 |     | S  |   |  |

2-Phenyl-thiophene: KF

Ar\_Br\_54\_RT\_To

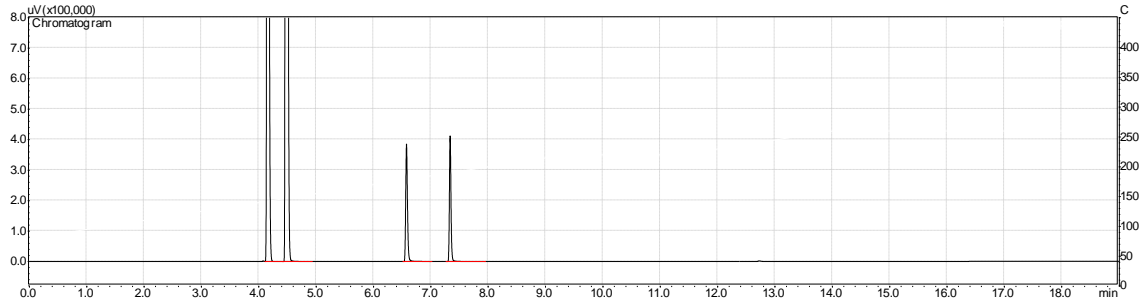

| Peak# | Ret.Time | Area       | Height     | Conc.   | Units | Mark | Compound ID# | Compound Name |
|-------|----------|------------|------------|---------|-------|------|--------------|---------------|
| 1     | 4.153    | 9063126.1  | 3996843.0  | 0.00000 | ppm   | SV   | 1            |               |
| 2     | 4.476    | 22355698.7 | 10097663.1 | 0.00000 | ppm   |      | 1            |               |
| 3     | 6.575    | 830177.4   | 380211.2   | 0.00000 | ppm   | S    | 2            |               |
| 4     | 7.336    | 779748.6   | 403588.9   | 0.00000 | ppm   | SV   | 3            |               |

L1\_Br\_54\_RT\_24H:

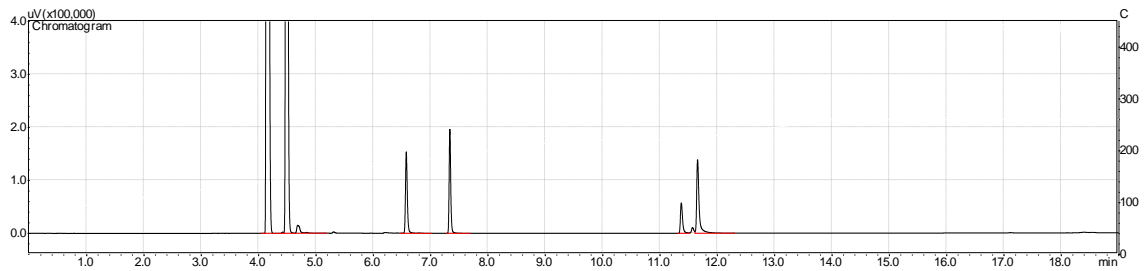

| Peak# | Ret.Time | Area       | Height    | Conc.   | Units | Mark | Compound ID# | Compound Name |
|-------|----------|------------|-----------|---------|-------|------|--------------|---------------|
| 1     | 4.145    | 13915423.0 | 5659448.8 | 0.00000 | ppm   | SV   | 1            |               |
| 2     | 4.485    | 8212447.3  | 3970692.2 | 0.00000 | ppm   | SV   | 1            |               |
| 3     | 6.574    | 341674.7   | 152701.9  | 0.00000 | ppm   | SV   | 2            |               |

|   |        |          |          |         |     |    |   |  |
|---|--------|----------|----------|---------|-----|----|---|--|
| 4 | 7.334  | 377913.2 | 194322.9 | 0.00000 | ppm | SV | 3 |  |
| 5 | 11.371 | 151118.2 | 57171.0  | 0.00000 |     |    |   |  |
| 6 | 11.655 | 412984.6 | 138126.7 | 0.00000 |     | V  |   |  |

L3\_Ar\_Br\_54\_RT\_24H:

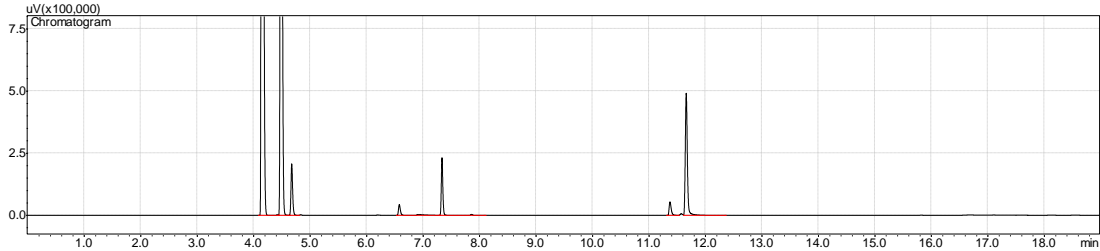

| Peak# | Ret.Time | Area       | Height    | Conc.   | Units | Mark | Compound ID# | Compound Name |
|-------|----------|------------|-----------|---------|-------|------|--------------|---------------|
| 1     | 4.146    | 13128864.3 | 5405540.7 | 0.00000 | ppm   | SV   | 1            |               |
| 2     | 4.484    | 9452947.5  | 4569745.5 | 0.00000 | ppm   | V    | 1            |               |
| 3     | 4.673    | 108175.4   | 204158.4  | 0.00000 |       | V    |              |               |
| 4     | 6.578    | 71250.0    | 43891.5   | 0.00000 | ppm   | SV   | 2            |               |
| 5     | 7.334    | 441243.3   | 229123.9  | 0.00000 | ppm   | SV   | 3            |               |
| 6     | 11.371   | 142363.0   | 54422.4   | 0.00000 |       |      |              |               |
| 7     | 11.658   | 1254178.8  | 485429.9  | 0.00000 |       | V    |              |               |

L2\_Ar\_Br\_54\_RT\_24H:

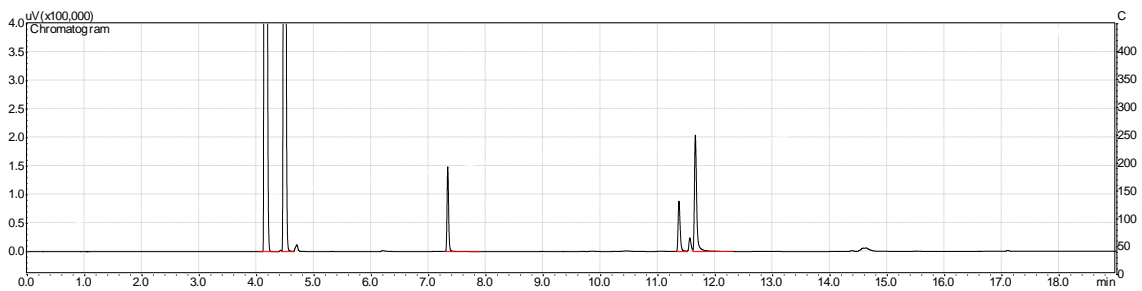

| Peak# | Ret.Time | Area       | Height    | Conc.   | Units | Mark | Compound ID# | Compound Name |
|-------|----------|------------|-----------|---------|-------|------|--------------|---------------|
| 1     | 4.146    | 12044168.2 | 5068029.6 | 0.00000 | ppm   | V    | 1            |               |
| 2     | 4.483    | 8559607.6  | 4179788.7 | 0.00000 | ppm   | V    | 1            |               |

|   |        |          |          |         |     |    |   |  |
|---|--------|----------|----------|---------|-----|----|---|--|
| 3 | 7.333  | 291214.8 | 147317.4 | 0.00000 | ppm | SV | 3 |  |
| 4 | 11.366 | 222447.3 | 88219.8  | 0.00000 |     | V  |   |  |
| 5 | 11.652 | 563154.8 | 202812.8 | 0.00000 |     | V  |   |  |

CyJohnPhos\_Br\_54\_RT\_24H:

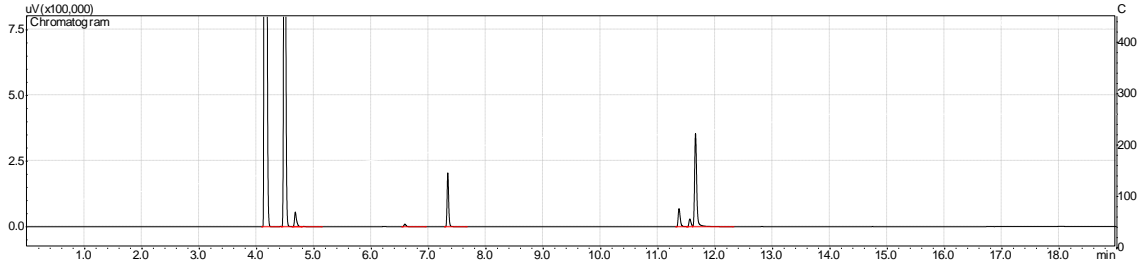

| Peak# | Ret.Time | Area       | Height    | Conc.   | Units | Mark | Compound ID# | Compound Name |
|-------|----------|------------|-----------|---------|-------|------|--------------|---------------|
| 1     | 4.144    | 13359887.0 | 5487310.0 | 0.00000 | ppm   | SV   | 1            |               |
| 2     | 4.485    | 6014261.0  | 2922409.8 | 0.00000 | ppm   | SV   | 1            |               |
| 3     | 4.674    | 136506.5   | 55603.7   | 0.00000 |       | T    |              |               |
| 4     | 6.585    | 29075.0    | 10463.5   | 0.00000 | ppm   | SV   | 2            |               |
| 5     | 7.334    | 389562.1   | 202652.8  | 0.00000 | ppm   | S    | 3            |               |
| 6     | 11.367   | 175161.1   | 69203.5   | 0.00000 |       |      |              |               |
| 7     | 11.555   | 76123.5    | 29523.1   | 0.00000 |       | V    |              |               |
| 8     | 11.655   | 924604.5   | 352305.3  | 0.00000 |       | V    |              |               |

JohnPhos\_Br\_54\_RT\_24H:

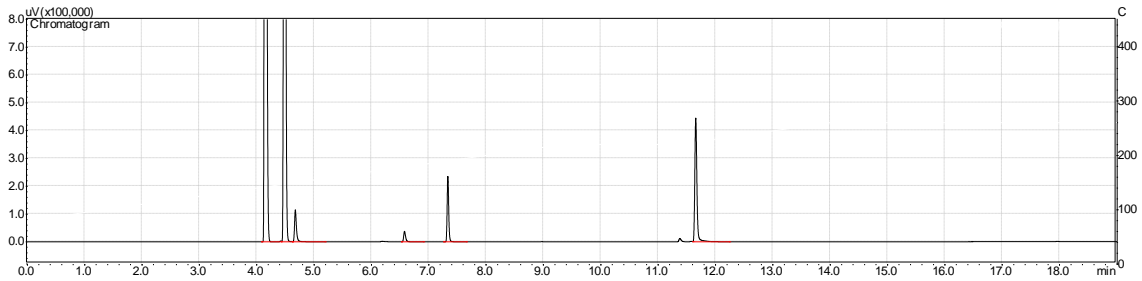

| Peak# | Ret.Time | Area | Height | Conc. | Units | Mark | Compound ID# | Compound Name |
|-------|----------|------|--------|-------|-------|------|--------------|---------------|
|       |          |      |        |       |       |      |              |               |



|   |        |            |           |         |     |    |   |  |
|---|--------|------------|-----------|---------|-----|----|---|--|
| 1 | 4.146  | 11730229.9 | 4965669.5 | 0.00000 | ppm | SV | 1 |  |
| 2 | 4.482  | 10144763.8 | 4901087.8 | 0.00000 | ppm | V  | 1 |  |
| 3 | 4.673  | 90242.3    | 114641.8  | 0.00000 |     | SV |   |  |
| 4 | 6.577  | 78345      | 37874.2   | 0.00000 | ppm | SV | 2 |  |
| 5 | 7.332  | 445190.9   | 231682.6  | 0.00000 | ppm | S  | 3 |  |
| 6 | 11.655 | 1138959.2  | 443638.7  | 0.00000 |     | V  |   |  |

SPhos\_Br\_54\_RT\_24H:

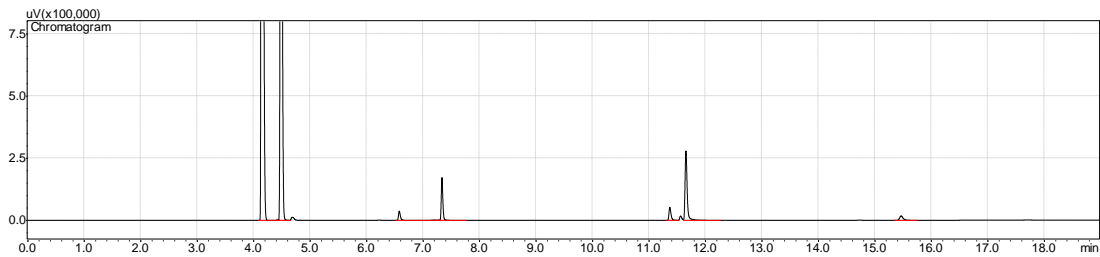

| Peak# | Ret.Time | Area       | Height    | Conc.   | Units | Mark | Compound ID# | Compound Name |
|-------|----------|------------|-----------|---------|-------|------|--------------|---------------|
| 1     | 4.145    | 12582681.5 | 5227104.3 | 0.00000 | ppm   | SV   | 1            |               |
| 2     | 4.483    | 8147708.4  | 3985522.2 | 0.00000 | ppm   | V    | 1            |               |
| 3     | 6.578    | 98452.9    | 37291.2   | 0.00000 | ppm   | SV   | 2            |               |
| 4     | 7.333    | 335759.3   | 170262.1  | 0.00000 | ppm   | V    | 3            |               |
| 5     | 11.368   | 135017.6   | 52127.4   | 0.00000 |       |      |              |               |
| 6     | 11.653   | 728416.9   | 275997.1  | 0.00000 |       | V    |              |               |
| 7     | 15.464   | 76126.5    | 17735.4   | 0.00000 | ppm   |      | 6            |               |

L4\_Br\_54\_RT\_24H:

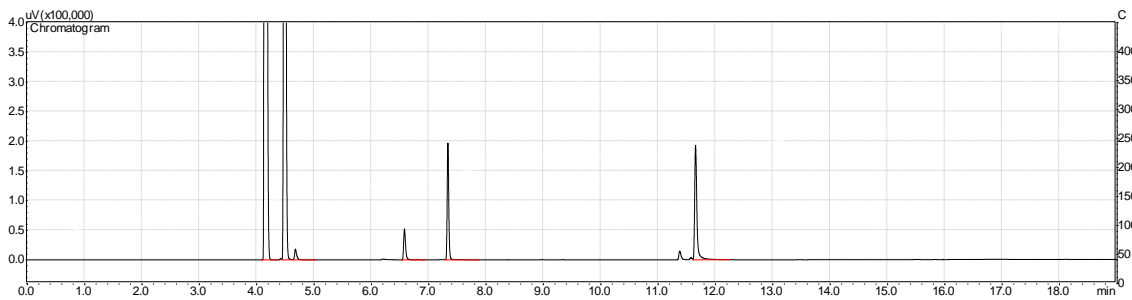

| Peak# | Ret.Time | Area       | Height    | Conc.   | Units | Mark | Compound ID# | Compound Name |
|-------|----------|------------|-----------|---------|-------|------|--------------|---------------|
| 1     | 4.145    | 12850739.1 | 5298921.2 | 0.00000 | ppm   | V    | 1            |               |
| 2     | 4.484    | 6946671.7  | 3374859.6 | 0.00000 | ppm   | SV   | 1            |               |
| 3     | 6.576    | 124106.3   | 51903.9   | 0.00000 | ppm   | SV   | 2            |               |
| 4     | 7.333    | 377063.1   | 195548.0  | 0.00000 | ppm   | SV   | 3            |               |
| 5     | 11.652   | 528637.1   | 191218.9  | 0.00000 |       | V    |              |               |

tBuDavePhos\_Br\_54\_RT\_24H:

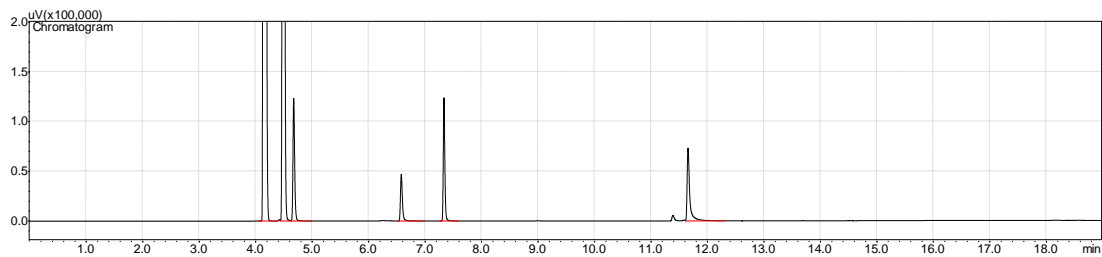

| Peak# | Ret.Time | Area       | Height    | Conc.   | Units | Mark | Compound ID# | Compound Name |
|-------|----------|------------|-----------|---------|-------|------|--------------|---------------|
| 1     | 4.144    | 13593053.8 | 5545587.9 | 0.00000 | ppm   | V    | 1            |               |
| 2     | 4.486    | 5137668.0  | 2524355.8 | 0.00000 | ppm   | V    | 1            |               |
| 3     | 4.673    | 258168.0   | 122076.2  | 0.00000 |       | V    |              |               |
| 4     | 6.577    | 173801.8   | 46549.9   | 0.00000 | ppm   | SV   | 2            |               |
| 5     | 7.334    | 238237.2   | 122739.7  | 0.00000 | ppm   |      | 3            |               |
| 6     | 11.655   | 239290.2   | 73043.7   | 0.00000 |       | SV   |              |               |

Ar\_Br\_50\_A\_RT\_To

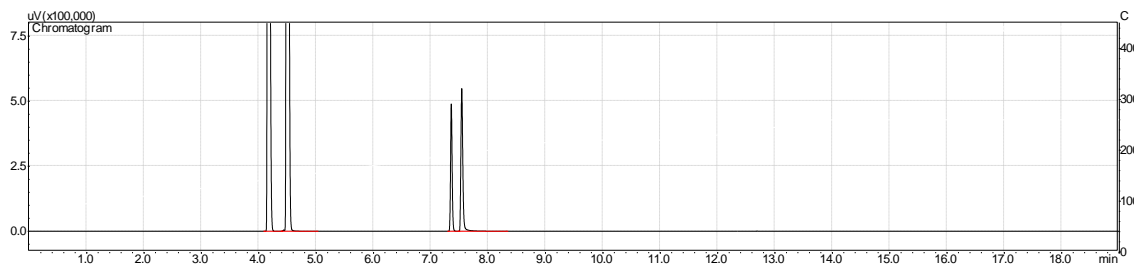

| Peak# | Ret.Time | Area | Height | Conc. | Units | Mark | Compound ID# | Compound Name |
|-------|----------|------|--------|-------|-------|------|--------------|---------------|
|-------|----------|------|--------|-------|-------|------|--------------|---------------|

|   |       |            |           |         |     |    |   |  |
|---|-------|------------|-----------|---------|-----|----|---|--|
| 1 | 4.164 | 12749509.2 | 5138847.4 | 0.00000 | ppm | SV | 1 |  |
| 2 | 4.494 | 22075436.0 | 9730688.5 | 0.00000 | ppm | V  | 1 |  |
| 3 | 7.356 | 934864.6   | 480970.6  | 0.00000 |     | V  |   |  |
| 4 | 7.539 | 1298336.5  | 543467.1  | 0.00000 |     | SV |   |  |

L1\_Br\_50\_A\_RT\_24H:

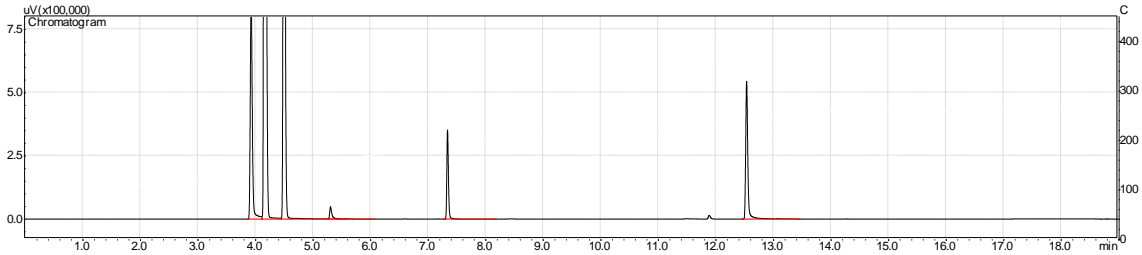

| Peak# | Ret.Time | Area       | Height    | Conc.   | Units | Mark | Compound ID# | Compound Name |
|-------|----------|------------|-----------|---------|-------|------|--------------|---------------|
| 1     | 3.923    | 2172025.4  | 863129.4  | 0.00000 |       | V    |              |               |
| 2     | 4.154    | 13514039.0 | 5283618.4 | 0.00000 | ppm   | V    | 1            |               |
| 3     | 4.492    | 7085670.7  | 3239634.8 | 0.00000 | ppm   | SV   | 1            |               |
| 4     | 5.301    | 136528.1   | 47339.5   | 0.00000 |       | T    |              | toluene       |
| 5     | 7.335    | 686224.0   | 350398.3  | 0.00000 | ppm   | S    | 3            |               |
| 6     | 12.532   | 1426439.5  | 541521.8  | 0.00000 |       | S    |              |               |

L3\_Ar\_Br\_50\_A\_RT\_24H:

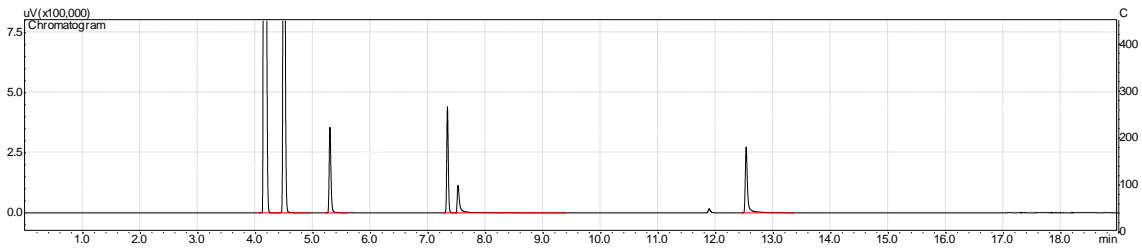

| Peak# | Ret.Time | Area       | Height    | Conc.   | Units | Mark | Compound ID# | Compound Name |
|-------|----------|------------|-----------|---------|-------|------|--------------|---------------|
| 1     | 4.152    | 15171250.1 | 5885437.5 | 0.00000 | ppm   | V    | 1            |               |
| 2     | 4.493    | 6283252.2  | 2954642.1 | 0.00000 | ppm   | V    | 1            |               |
| 3     | 5.293    | 770209.0   | 350573.5  | 0.00000 |       |      |              | toluene       |
| 4     | 7.336    | 818724.0   | 437448.0  | 0.00000 | ppm   | V    | 3            |               |
| 5     | 7.520    | 210524.5   | 112972.9  | 0.00000 |       | SV   |              |               |
| 6     | 12.528   | 779244.0   | 272799.0  | 0.00000 |       |      |              |               |

CyJohnPhos\_Ar\_Br\_50\_A\_RT\_24H:

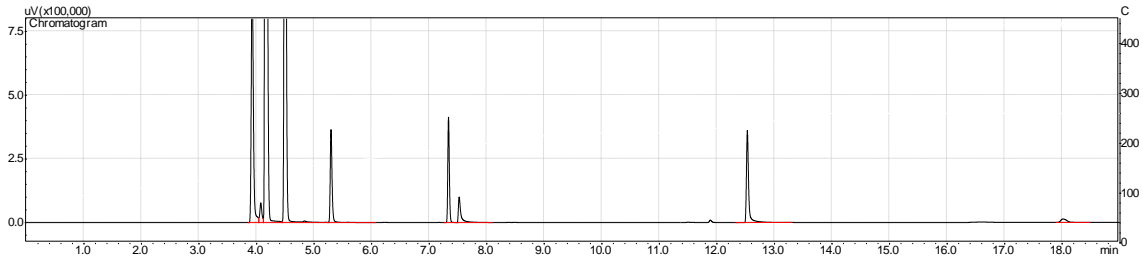

| Peak# | Ret.Time | Area       | Height    | Conc.   | Units | Mark | Compound ID# | Compound Name |
|-------|----------|------------|-----------|---------|-------|------|--------------|---------------|
| 1     | 3.923    | 2487588.6  | 987350.9  | 0.00000 |       | V    |              |               |
| 2     | 4.073    | 199325.8   | 77304.2   | 0.00000 | ppm   | V    | 1            |               |
| 3     | 4.155    | 12886853.1 | 5047157.0 | 0.00000 | ppm   | V    | 1            |               |
| 4     | 4.493    | 7274611.6  | 3295404.8 | 0.00000 | ppm   | SV   | 1            |               |
| 5     | 5.294    | 811719.1   | 360113.4  | 0.00000 |       | SV   |              | toluene       |
| 6     | 7.335    | 768624.5   | 410483.8  | 0.00000 | ppm   |      | 3            |               |
| 7     | 7.520    | 204268.5   | 99993.7   | 0.00000 |       | V    |              |               |
| 8     | 12.528   | 1203089.5  | 359602.3  | 0.00000 |       |      |              |               |
| 9     | 18.014   | 102013.3   | 13638.5   | 0.00000 | ppm   |      | 7            |               |

JohnPhos\_Ar\_Br\_50\_A\_RT\_24H:

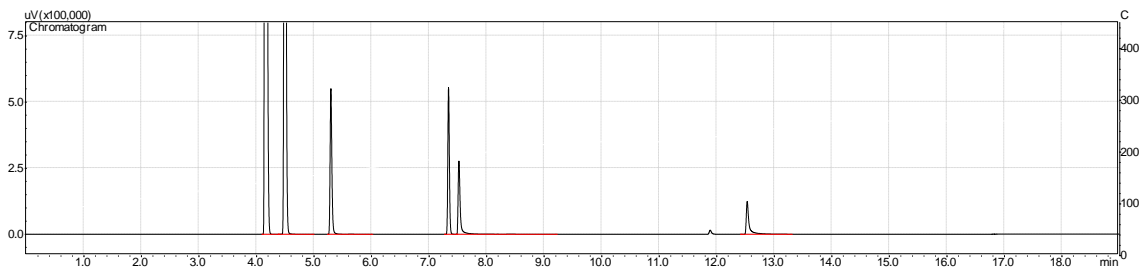

| Peak# | Ret.Time | Area       | Height    | Conc.   | Units | Mark | Compound ID# | Compound Name |
|-------|----------|------------|-----------|---------|-------|------|--------------|---------------|
| 1     | 4.153    | 13934795.6 | 5497121.7 | 0.00000 | ppm   | V    | 1            |               |
| 2     | 4.491    | 8399473.8  | 3890080.1 | 0.00000 | ppm   | V    | 1            |               |
| 3     | 5.292    | 1168447.9  | 542263.8  | 0.00000 |       | S    |              | toluene       |
| 4     | 7.337    | 1035941.9  | 544262.2  | 0.00000 | ppm   | V    | 3            |               |
| 5     | 7.518    | 816905.7   | 274106.8  | 0.00000 |       | SV   |              |               |
| 6     | 12.528   | 427955.3   | 124287.4  | 0.00000 |       |      |              |               |

Ar\_Br\_50\_B\_RT\_To

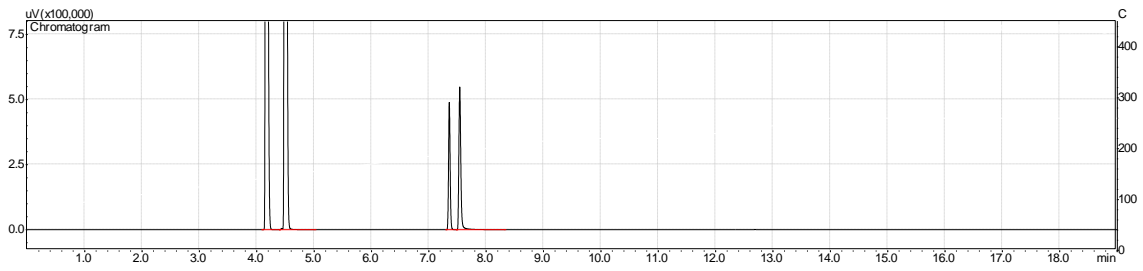

| Peak# | Ret.Time | Area       | Height    | Conc.   | Units | Mark | Compound ID# | Compound Name |
|-------|----------|------------|-----------|---------|-------|------|--------------|---------------|
| 1     | 4.164    | 12749509.2 | 5138847.4 | 0.00000 | ppm   | SV   | 1            |               |
| 2     | 4.494    | 22075436.0 | 9730688.5 | 0.00000 | ppm   | V    | 1            |               |
| 3     | 7.356    | 934864.6   | 480970.6  | 0.00000 |       | V    |              |               |
| 4     | 7.539    | 1298336.5  | 543467.1  | 0.00000 |       | SV   |              |               |

L1\_Br\_50\_B\_RT\_24H:

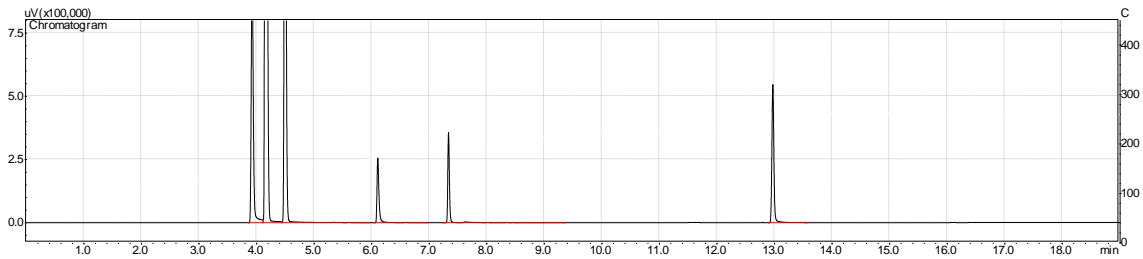

| Peak# | Ret.Time | Area       | Height    | Conc.   | Units | Mark | Compound ID# | Compound Name |
|-------|----------|------------|-----------|---------|-------|------|--------------|---------------|
| 1     | 3.922    | 2556081.5  | 1014459.6 | 0.00000 |       | V    |              |               |
| 2     | 4.154    | 13151120.2 | 5123544.0 | 0.00000 | ppm   | V    | 1            |               |
| 3     | 4.493    | 5732916.5  | 2611967.6 | 0.00000 | ppm   | SV   | 1            |               |
| 4     | 6.106    | 610331.2   | 253476.6  | 0.00000 |       | S    |              | m-xylene      |
| 5     | 7.335    | 686487.7   | 353850.8  | 0.00000 | ppm   | S    | 3            |               |
| 6     | 12.970   | 1330824.0  | 541083.3  | 0.00000 |       | V    |              |               |

L3\_Ar\_Br\_50\_B\_RT\_24H:

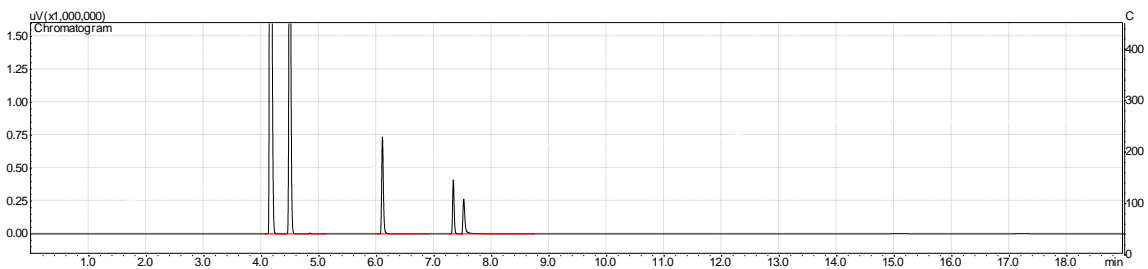

| Peak# | Ret.Time | Area       | Height    | Conc.   | Units | Mark | Compound ID# | Compound Name |
|-------|----------|------------|-----------|---------|-------|------|--------------|---------------|
| 1     | 4.151    | 14355453.9 | 5617280.3 | 0.00000 | ppm   | V    | 1            |               |

|   |       |           |           |         |     |    |   |          |
|---|-------|-----------|-----------|---------|-----|----|---|----------|
| 2 | 4.490 | 7448111.2 | 3435262.7 | 0.00000 | ppm | SV | 1 |          |
| 3 | 6.102 | 1523838.8 | 732024.8  | 0.00000 |     | S  |   | m-xylene |
| 4 | 7.334 | 760727.4  | 406397.5  | 0.00000 | ppm | V  | 3 |          |
| 5 | 7.515 | 689139.7  | 262599.9  | 0.00000 |     | SV |   |          |

CyJohnPhos\_Ar\_Br\_50\_B\_RT\_24H:

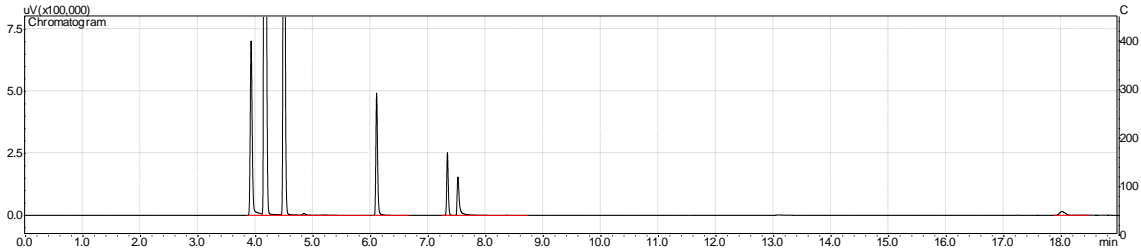

| Peak# | Ret.Time | Area       | Height    | Conc.   | Units | Mark | Compound ID# | Compound Name |
|-------|----------|------------|-----------|---------|-------|------|--------------|---------------|
| 1     | 3.922    | 1723215.0  | 697248.0  | 0.00000 |       | V    |              |               |
| 2     | 4.154    | 11501247.1 | 4688996.6 | 0.00000 | ppm   | V    | 1            |               |
| 3     | 4.491    | 5873561.9  | 2745473.3 | 0.00000 | ppm   | SV   | 1            |               |
| 4     | 6.102    | 1031539.9  | 490584.3  | 0.00000 |       |      |              | m-xylene      |
| 5     | 7.332    | 469608.0   | 248696.2  | 0.00000 | ppm   |      | 3            |               |
| 6     | 7.515    | 443738.7   | 152833.7  | 0.00000 |       | SV   |              |               |
| 7     | 18.009   | 106258.2   | 15053.6   | 0.00000 | ppm   |      | 7            |               |

JohnPhos\_Ar\_Br\_50\_B\_RT\_24H:

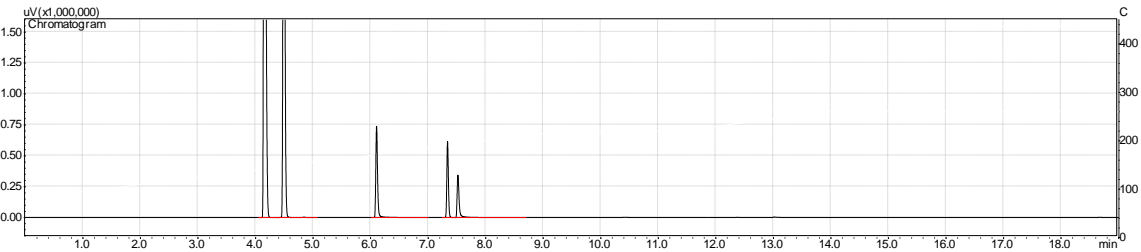

| Peak# | Ret.Time | Area       | Height    | Conc.   | Units | Mark | Compound ID# | Compound Name |
|-------|----------|------------|-----------|---------|-------|------|--------------|---------------|
| 1     | 4.152    | 14436647.6 | 5594525.6 | 0.00000 | ppm   | V    | 1            |               |
| 2     | 4.489    | 9914143.1  | 4514933.0 | 0.00000 | ppm   | SV   | 1            |               |
| 3     | 6.103    | 1601555.7  | 733045.7  | 0.00000 |       | S    |              | m-xylene      |
| 4     | 7.337    | 1154987.5  | 602501.4  | 0.00000 | ppm   |      | 3            |               |
| 5     | 7.517    | 847640.0   | 341784.4  | 0.00000 |       | SV   |              |               |

Ar\_Br\_52\_A\_RT\_To



| Peak # | Ret. Time | Area       | Height     | Conc.  | Units | Mark | Compound ID# | Compound Name |
|--------|-----------|------------|------------|--------|-------|------|--------------|---------------|
| 1      | 4.155     | 8378818.4  | 3742545.8  | 0.0000 | ppm   | SV   | 1            |               |
| 2      | 4.476     | 23303114.4 | 10461192.8 | 0.0000 | ppm   |      | 1            |               |
| 3      | 7.074     | 816951.0   | 355151.1   | 0.0000 | ppm   |      | 3            |               |
| 4      | 7.338     | 1216411.6  | 638908.6   | 0.0000 | ppm   | SV   | 3            |               |

L2\_Br\_52\_A\_RT\_24H\_KF:

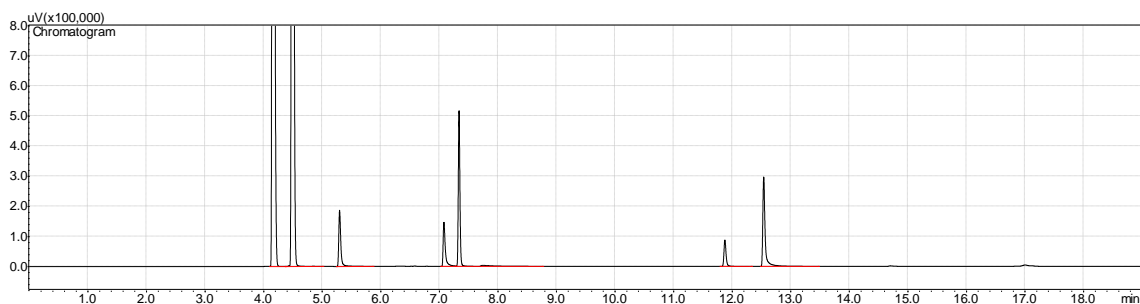

| Peak# | Ret. Time | Area       | Height    | Conc.   | Units | Mark | Compound ID# | Compound Name |
|-------|-----------|------------|-----------|---------|-------|------|--------------|---------------|
| 1     | 4.157     | 13237232.1 | 5224483.6 | 0.00000 | ppm   | SV   | 1            |               |
| 2     | 4.489     | 14166751.6 | 6339253.6 | 0.00000 | ppm   | SV   | 1            |               |
| 3     | 5.296     | 450389.8   | 185338.6  | 0.00000 |       |      |              | toluene       |
| 4     | 7.078     | 181612.0   | 145516.2  | 0.00000 | ppm   |      | 3            |               |
| 5     | 7.336     | 992683.4   | 509797.5  | 0.00000 | ppm   | SV   | 3            |               |
| 6     | 11.875    | 220483.5   | 87446.0   | 0.00000 |       | S    |              |               |
| 7     | 12.538    | 833557.6   | 295432.9  | 0.00000 |       | S    |              |               |

L4\_Ar\_Br\_52\_A\_RT\_24H\_KF:

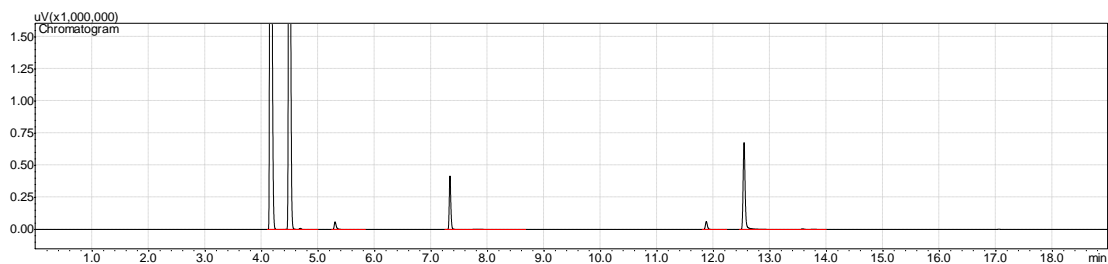

| Peak# | Ret.Time | Area       | Height    | Conc.   | Units | Mark | Compound ID# | Compound Name |
|-------|----------|------------|-----------|---------|-------|------|--------------|---------------|
| 1     | 4.155    | 13536573.5 | 5292861.8 | 0.00000 | ppm   | SV   | 1            |               |
| 2     | 4.489    | 12137058.0 | 5504777.9 | 0.00000 | ppm   | SV   | 1            |               |
| 3     | 5.298    | 158160.0   | 59269.5   | 0.00000 |       | S    |              | toluene       |
| 4     | 7.333    | 798783.1   | 410536.6  | 0.00000 | ppm   | S    | 3            |               |
| 5     | 11.872   | 154947.2   | 61916.6   | 0.00000 |       | S    |              |               |
| 6     | 12.541   | 1730317.8  | 670143.3  | 0.00000 |       | S    |              |               |

CyJohnPhos\_Ar\_Br\_52\_A\_RT\_24H:

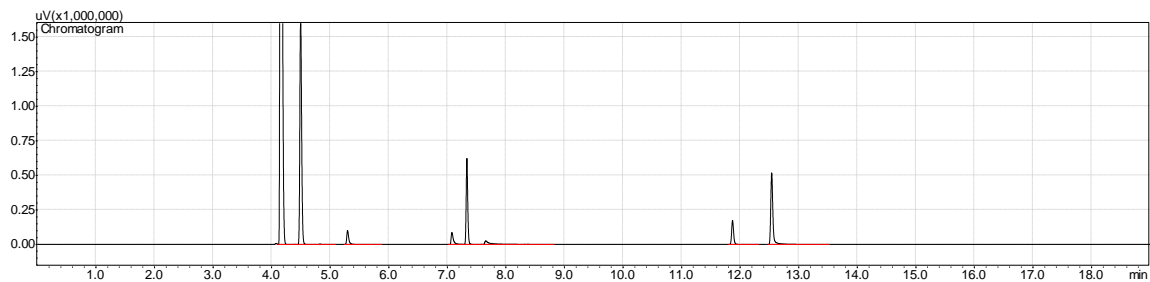

| Peak# | Ret.Time | Area       | Height    | Conc.   | Units | Mark | Compound ID# | Compound Name |
|-------|----------|------------|-----------|---------|-------|------|--------------|---------------|
| 1     | 4.155    | 13237869.0 | 5257926.9 | 0.00000 | ppm   | V    | 1            |               |
| 2     | 4.495    | 3481225.7  | 1614922.6 | 0.00000 | ppm   | SV   | 1            |               |
| 3     | 5.296    | 249565.6   | 100362.0  | 0.00000 |       | S    |              | toluene       |
| 4     | 7.078    | 59790.5    | 85801.4   | 0.00000 | ppm   |      | 3            |               |
| 5     | 7.334    | 1171767.7  | 615799.7  | 0.00000 | ppm   | V    | 3            |               |
| 6     | 7.656    | 195603.6   | 26100.6   | 0.00000 |       | SV   |              |               |
| 7     | 11.870   | 407337.9   | 172539.0  | 0.00000 |       | SV   |              |               |
| 8     | 12.538   | 1336102.3  | 513460.1  | 0.00000 |       |      |              |               |

JohnPhos\_Ar\_Br\_52\_A\_RT\_24H:



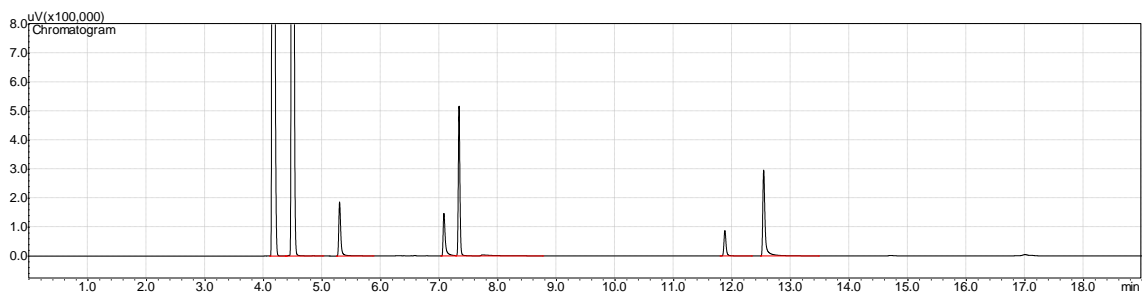

| Peak# | Ret.Time | Area       | Height    | Conc.   | Units | Mark | Compound ID# | Compound Name |
|-------|----------|------------|-----------|---------|-------|------|--------------|---------------|
| 1     | 4.157    | 13237232.1 | 5224483.6 | 0.00000 | ppm   | SV   | 1            |               |
| 2     | 4.489    | 14166751.6 | 6339253.6 | 0.00000 | ppm   | SV   | 1            |               |
| 3     | 5.296    | 450389.8   | 185338.6  | 0.00000 |       |      |              | toluene       |
| 4     | 7.078    | 201612     | 145516.2  | 0.00000 | ppm   |      | 3            |               |
| 5     | 7.336    | 992683.4   | 509797.5  | 0.00000 | ppm   | SV   | 3            |               |
| 6     | 11.875   | 220483.5   | 87446.0   | 0.00000 |       | S    |              |               |
| 7     | 12.538   | 833557.6   | 295432.9  | 0.00000 |       | S    |              |               |

Ar\_Br\_52\_B\_RT\_To

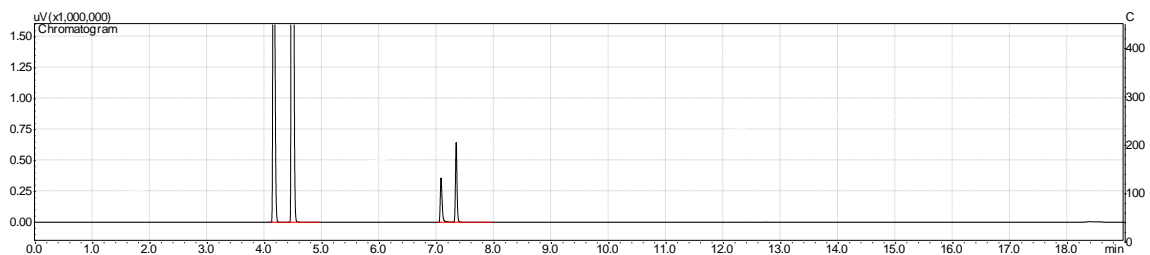

| Peak # | Ret. Time | Area       | Height     | Conc.   | Units | Mark | Compound ID# | Compound Name |
|--------|-----------|------------|------------|---------|-------|------|--------------|---------------|
| 1      | 4.155     | 8378818.4  | 3742545.8  | 0.00000 | ppm   | SV   | 1            |               |
| 2      | 4.476     | 23303114.4 | 10461192.8 | 0.00000 | ppm   |      | 1            |               |
| 3      | 7.074     | 816951.0   | 355151.1   | 0.00000 | ppm   |      | 3            |               |
| 4      | 7.338     | 1216411.6  | 638908.6   | 0.00000 | ppm   | SV   | 3            |               |

L2\_Br\_52\_B\_RT\_24H\_KF:

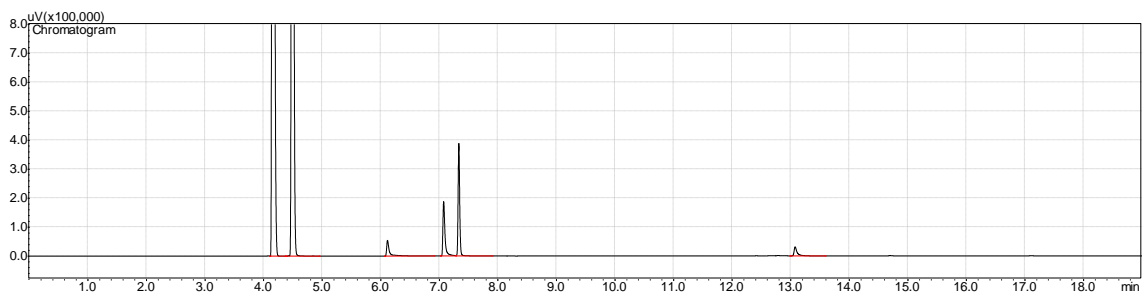

| Peak# | Ret.Time | Area       | Height    | Conc.   | Units | Mark | Compound ID# | Compound Name |
|-------|----------|------------|-----------|---------|-------|------|--------------|---------------|
| 1     | 4.154    | 13823053.7 | 5396472.2 | 0.00000 | ppm   | V    | 1            |               |
| 2     | 4.489    | 11817732.7 | 5351163.2 | 0.00000 | ppm   | SV   | 1            |               |
| 3     | 6.115    | 195434.2   | 54123.7   | 0.00000 |       | S    |              | m-xylene      |
| 4     | 7.074    | 652955.6   | 187147.0  | 0.00000 | ppm   |      | 3            |               |
| 5     | 7.332    | 745507.3   | 379741.9  | 0.00000 | ppm   | SV   | 3            |               |
| 6     | 13.075   | 118442.1   | 31505.0   | 0.00000 |       | SV   |              |               |

L4\_Ar\_Br\_52\_B\_RT\_24H\_KF:

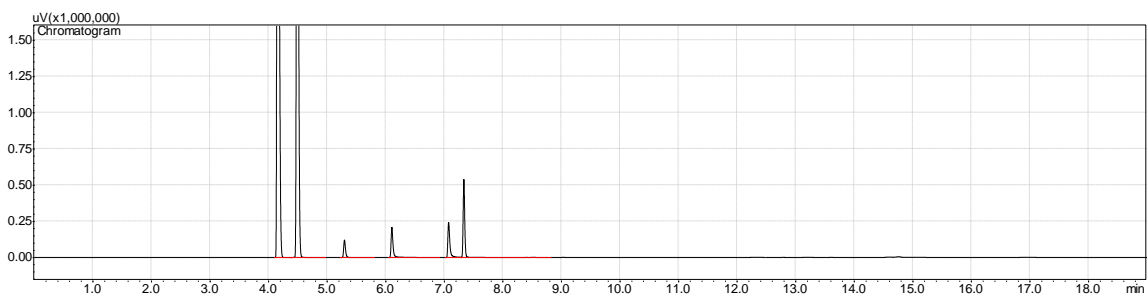

| Peak# | Ret.Time | Area       | Height    | Conc.   | Units | Mark | Compound ID# | Compound Name |
|-------|----------|------------|-----------|---------|-------|------|--------------|---------------|
| 1     | 4.154    | 13612575.3 | 5310458.5 | 0.00000 | ppm   | SV   | 1            |               |
| 2     | 4.488    | 12407637.3 | 5614667.5 | 0.00000 | ppm   | SV   | 1            |               |
| 3     | 5.294    | 273311.6   | 120739.8  | 0.00000 |       | S    |              |               |
| 4     | 6.104    | 512888.6   | 205888.3  | 0.00000 |       | S    |              | m-xylene      |
| 5     | 7.073    | 587878.6   | 240158.2  | 0.00000 | ppm   |      | 3            |               |
| 6     | 7.333    | 1029077.1  | 531089.5  | 0.00000 | ppm   | SV   | 3            |               |

CyJohnPhos\_Ar\_Br\_52\_B\_RT\_24H:

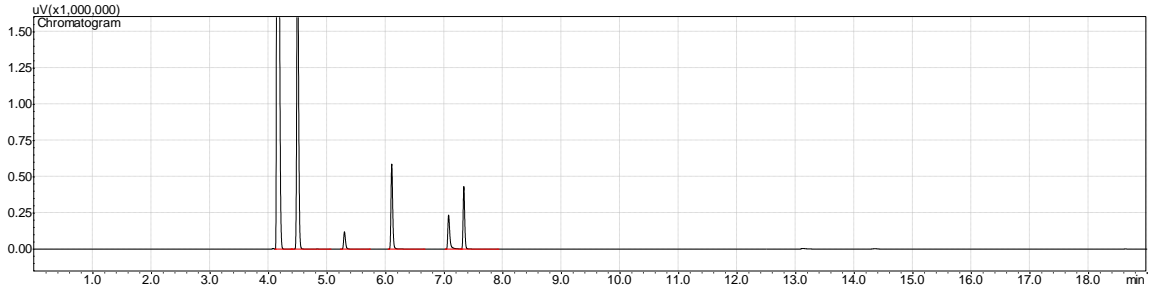

| Peak# | Ret.Time | Area       | Height    | Conc.   | Units | Mark | Compound ID# | Compound Name |
|-------|----------|------------|-----------|---------|-------|------|--------------|---------------|
| 1     | 4.151    | 15837782.6 | 6038324.6 | 0.00000 | ppm   | V    | 1            |               |
| 2     | 4.493    | 4799139.7  | 2236927.2 | 0.00000 | ppm   | SV   | 1            |               |
| 3     | 5.294    | 268600.1   | 119581.2  | 0.00000 |       | S    |              |               |
| 4     | 6.102    | 1215891.7  | 582272.7  | 0.00000 |       | S    |              | m-xylene      |
| 5     | 7.073    | 593976.4   | 233856.6  | 0.00000 | ppm   |      | 3            |               |
| 6     | 7.333    | 831459.4   | 424873.5  | 0.00000 | ppm   | SV   | 3            |               |

JohnPhos\_Ar\_Br\_52\_B\_RT\_24H:

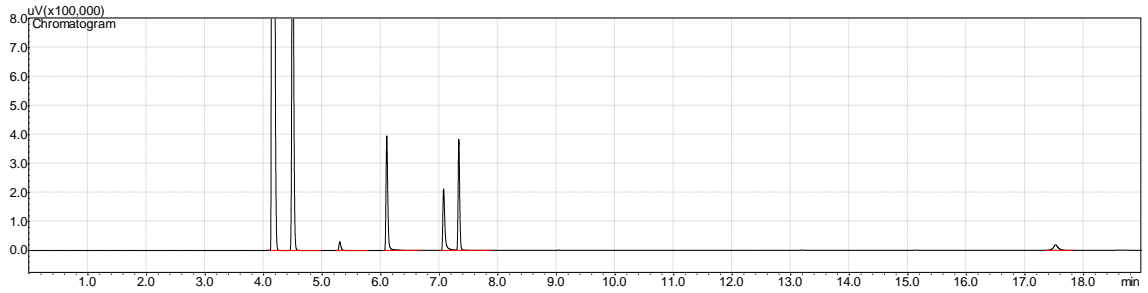

| Peak# | Ret.Time | Area       | Height    | Conc.   | Units | Mark | Compound ID# | Compound Name |
|-------|----------|------------|-----------|---------|-------|------|--------------|---------------|
| 1     | 4.151    | 16013780.0 | 6103904.7 | 0.00000 | ppm   | SV   | 1            |               |
| 2     | 4.495    | 3126958.3  | 1448629.2 | 0.00000 | ppm   | SV   | 1            |               |
| 3     | 5.300    | 77529.7    | 30904.0   | 0.00000 |       | S    |              |               |
| 4     | 6.102    | 859521.7   | 393268.5  | 0.00000 |       |      |              | m-xylene      |
| 5     | 7.073    | 705239.5   | 211180.4  | 0.00000 | ppm   |      | 3            |               |
| 6     | 7.333    | 735408.1   | 378435.5  | 0.00000 | ppm   | SV   | 3            |               |
| 7     | 17.522   | 111527.6   | 19022.8   | 0.00000 | ppm   |      | 7            |               |

Ar\_Br\_54\_A\_RT\_To

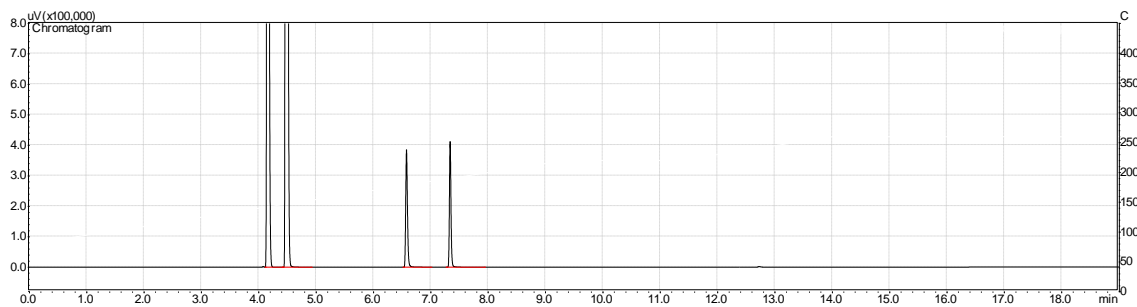

| Peak# | Ret.Time | Area       | Height     | Conc.   | Units | Mark | Compound ID# | Compound Name |
|-------|----------|------------|------------|---------|-------|------|--------------|---------------|
| 1     | 4.153    | 9063126.1  | 3996843.0  | 0.00000 | ppm   | SV   | 1            |               |
| 2     | 4.476    | 22355698.7 | 10097663.1 | 0.00000 | ppm   |      | 1            |               |
| 3     | 6.575    | 830177.4   | 380211.2   | 0.00000 | ppm   | S    | 2            |               |
| 4     | 7.336    | 779748.6   | 403588.9   | 0.00000 | ppm   | SV   | 3            |               |

L2\_Br\_54\_A\_RT\_24H:

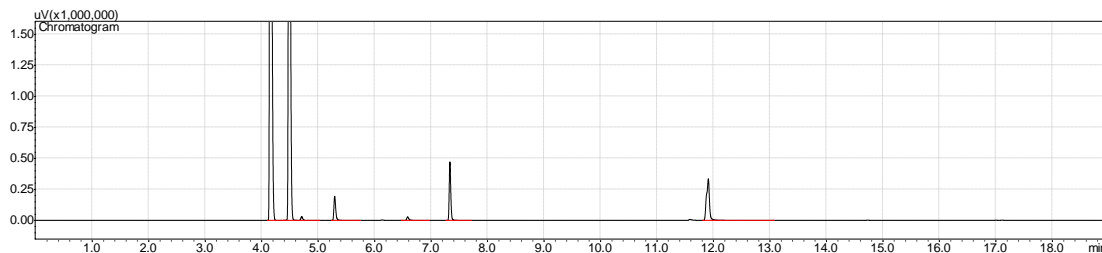

| Peak# | Ret.Time | Area       | Height    | Conc.   | Units | Mark | Compound ID# | Compound Name |
|-------|----------|------------|-----------|---------|-------|------|--------------|---------------|
| 1     | 4.153    | 13667509.2 | 5386430.1 | 0.00000 | ppm   | SV   | 1            |               |
| 2     | 4.487    | 12740693.8 | 5741663.8 | 0.00000 | ppm   | SV   | 1            |               |
| 3     | 5.292    | 436200.5   | 194541.2  | 0.00000 |       | S    |              | toluene       |
| 4     | 6.583    | 40123.3    | 28817.3   | 0.00000 | ppm   | SV   | 2            |               |
| 5     | 7.333    | 898210.0   | 461482.4  | 0.00000 | ppm   | S    | 3            |               |
| 6     | 11.908   | 1225416.1  | 332362.1  | 0.00000 |       | SV   |              |               |

L3\_Ar\_A\_Br\_54\_RT\_24H:

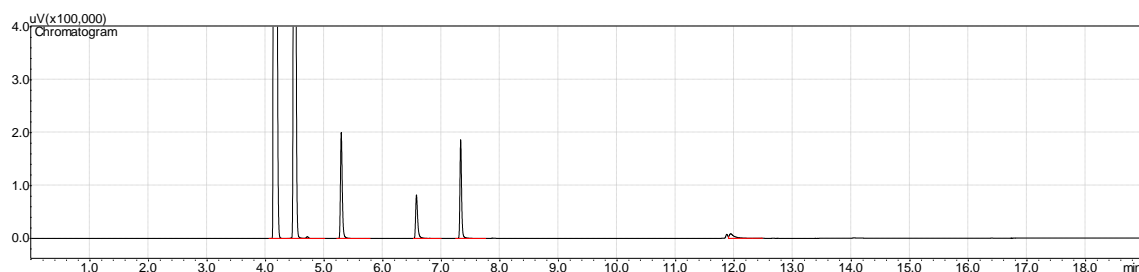

| Peak# | Ret.Time | Area | Height | Conc. | Units | Mark | Compound ID# | Compound Name |
|-------|----------|------|--------|-------|-------|------|--------------|---------------|
|-------|----------|------|--------|-------|-------|------|--------------|---------------|

|   |        |            |           |         |     |    |   |         |
|---|--------|------------|-----------|---------|-----|----|---|---------|
| 1 | 4.149  | 16485417.1 | 6247488.7 | 0.00000 | ppm | V  | 1 |         |
| 2 | 4.491  | 5907424.3  | 2737454.0 | 0.00000 | ppm | SV | 1 |         |
| 3 | 5.291  | 435609.9   | 199137.3  | 0.00000 |     | S  |   | toluene |
| 4 | 6.575  | 733558.9   | 81971.3   | 0.00000 | ppm | SV | 2 |         |
| 5 | 7.330  | 368153.8   | 184953.0  | 0.00000 | ppm |    | 3 |         |
| 6 | 11.940 | 56500.4    | 8952.3    | 0.00000 |     | V  |   |         |

CyJohnPhos\_Ar\_Br\_54\_A\_RT\_24H:

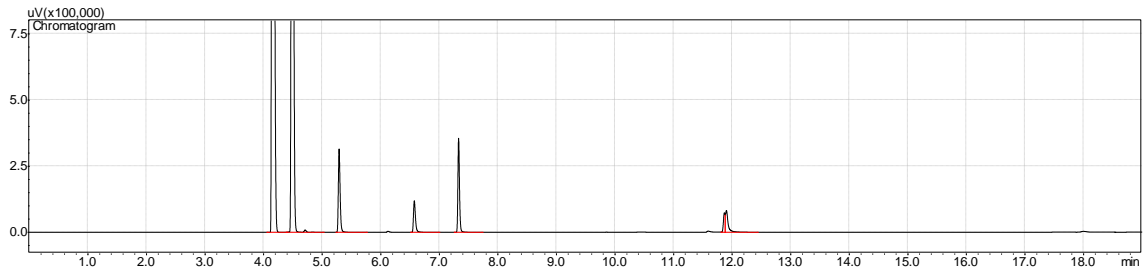

| Peak# | Ret.Time | Area       | Height    | Conc.   | Units | Mark | Compound ID# | Compound Name |
|-------|----------|------------|-----------|---------|-------|------|--------------|---------------|
| 1     | 4.151    | 14252315.8 | 5572666.4 | 0.00000 | ppm   | SV   | 1            |               |
| 2     | 4.486    | 11300227.9 | 5131135.8 | 0.00000 | ppm   | SV   | 1            |               |
| 3     | 5.289    | 672469.5   | 310287.7  | 0.00000 |       | S    |              | toluene       |
| 4     | 6.572    | 583678.6   | 118713.7  | 0.00000 | ppm   | SV   | 2            |               |
| 5     | 7.329    | 682146.6   | 352734.2  | 0.00000 | ppm   | S    | 3            |               |
| 6     | 11.867   | 147518.7   | 73316.4   | 0.00000 |       | V    |              |               |
| 7     | 11.901   | 263828.0   | 82007.0   | 0.00000 |       | V    |              |               |

JohnPhos\_Ar\_Br\_54\_A\_RT\_24H:

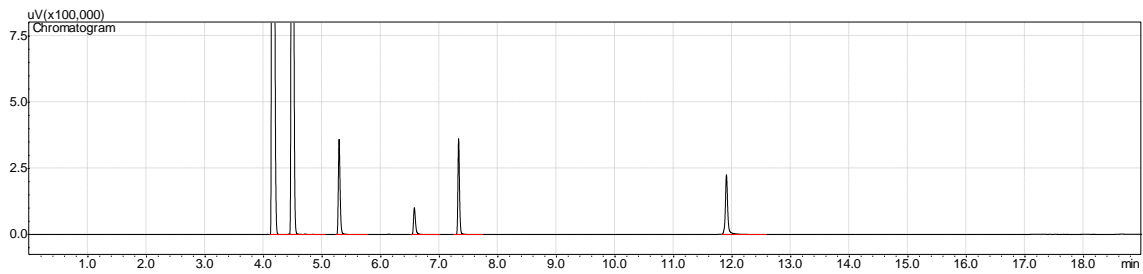

| Peak# | Ret.Time | Area       | Height    | Conc.   | Units | Mark | Compound ID# | Compound Name |
|-------|----------|------------|-----------|---------|-------|------|--------------|---------------|
| 1     | 4.151    | 14003058.7 | 5503664.7 | 0.00000 | ppm   | SV   | 1            |               |
| 2     | 4.486    | 11180184.2 | 5100033.7 | 0.00000 | ppm   | SV   | 1            |               |
| 3     | 5.289    | 762891.8   | 353895.9  | 0.00000 |       | S    |              | toluene       |
| 4     | 6.573    | 272446.2   | 100983.8  | 0.00000 | ppm   | SV   | 2            |               |
| 5     | 7.329    | 692669.2   | 359903.4  | 0.00000 | ppm   | S    | 3            |               |
| 6     | 11.902   | 637822.4   | 224525.9  | 0.00000 |       | V    |              |               |

Ar\_Br\_54\_B\_RT\_To

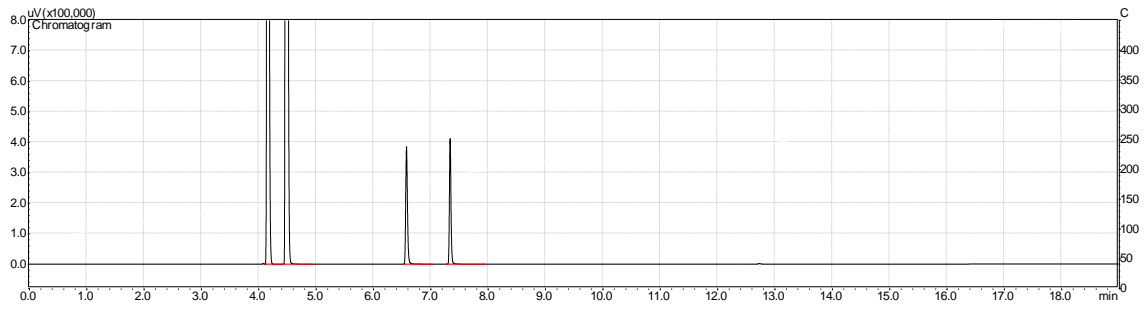

| Peak # | Ret. Time | Area       | Height     | Conc.   | Units | Mark | Compound ID# | Compound Name |
|--------|-----------|------------|------------|---------|-------|------|--------------|---------------|
| 1      | 4.153     | 9063126.1  | 3996843.0  | 0.00000 | ppm   | SV   | 1            |               |
| 2      | 4.476     | 22355698.7 | 10097663.1 | 0.00000 | ppm   |      | 1            |               |
| 3      | 6.575     | 830177.4   | 380211.2   | 0.00000 | ppm   | S    | 2            |               |
| 4      | 7.336     | 779748.6   | 403588.9   | 0.00000 | ppm   | SV   | 3            |               |

L2\_Br\_54\_B\_RT\_24H:

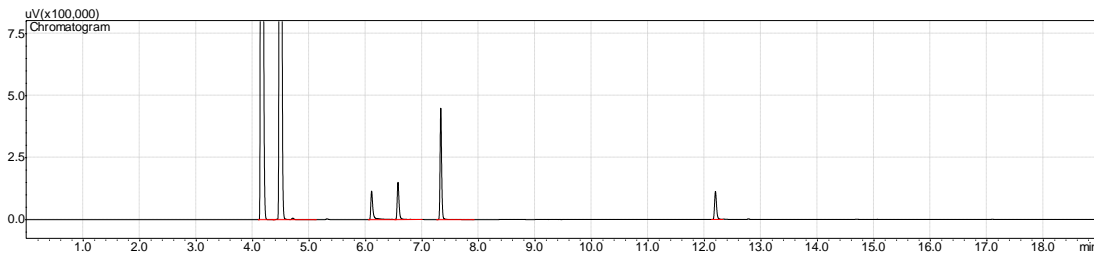

| Peak# | Ret. Time | Area       | Height    | Conc.   | Units | Mark | Compound ID# | Compound Name |
|-------|-----------|------------|-----------|---------|-------|------|--------------|---------------|
| 1     | 4.153     | 13247857.1 | 5236773.0 | 0.00000 | ppm   | V    | 1            |               |
| 2     | 4.485     | 13994258.1 | 6246508.2 | 0.00000 | ppm   | SV   | 1            |               |
| 3     | 6.105     | 322058.1   | 113767.6  | 0.00000 |       | S    |              | m-xylene      |
| 4     | 6.572     | 393746.2   | 148577.5  | 0.00000 | ppm   | SV   | 2            |               |
| 5     | 7.330     | 851760.5   | 445937.9  | 0.00000 | ppm   | S    | 3            |               |
| 6     | 12.194    | 275383.4   | 112804.4  | 0.00000 |       |      |              |               |

L3\_Ar\_Br\_54\_B\_RT\_24H:

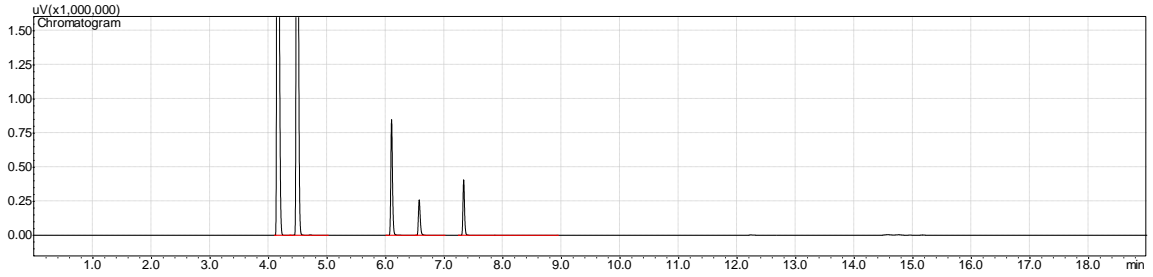

| Peak# | Ret.Time | Area       | Height    | Conc.   | Units | Mark | Compound ID# | Compound Name |
|-------|----------|------------|-----------|---------|-------|------|--------------|---------------|
| 1     | 4.152    | 13185244.6 | 5240434.2 | 0.00000 | ppm   | V    | 1            |               |
| 2     | 4.485    | 13293070.5 | 5994292.0 | 0.00000 | ppm   | SV   | 1            |               |
| 3     | 6.099    | 1725657.7  | 843086.8  | 0.00000 |       | S    |              | m-xylene      |
| 4     | 6.571    | 574068.7   | 255825.7  | 0.00000 | ppm   | SV   | 2            |               |
| 5     | 7.330    | 772288.6   | 403381.4  | 0.00000 | ppm   | S    | 3            |               |

CyJohnPhos\_Ar\_Br\_54\_B\_RT\_24H:

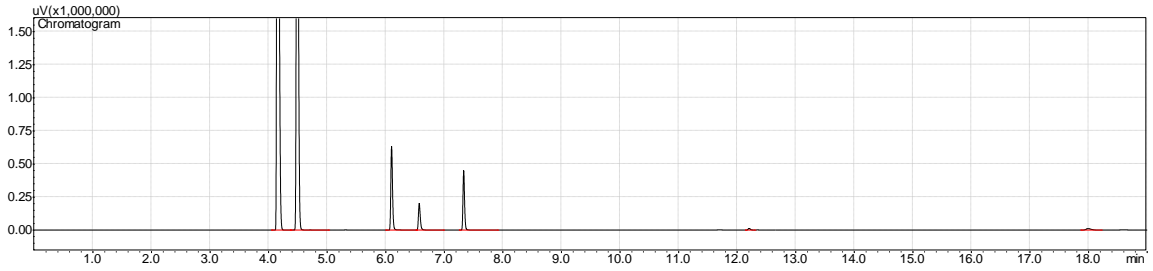

| Peak# | Ret.Time | Area       | Height    | Conc.   | Units | Mark | Compound ID# | Compound Name |
|-------|----------|------------|-----------|---------|-------|------|--------------|---------------|
| 1     | 4.151    | 13922743.1 | 5474093.3 | 0.00000 | ppm   | V    | 1            |               |
| 2     | 4.487    | 10849552.1 | 4944175.4 | 0.00000 | ppm   | SV   | 1            |               |
| 3     | 6.099    | 1293522.6  | 628165.9  | 0.00000 |       | S    |              |               |
| 4     | 6.571    | 456514.9   | 198957.7  | 0.00000 | ppm   | SV   | 2            | m-xylene      |
| 5     | 7.330    | 853609.2   | 445527.6  | 0.00000 | ppm   | S    | 3            |               |
| 6     | 12.203   | 36544.5    | 12920.6   | 0.00000 |       | V    |              |               |
| 7     | 17.994   | 64095.2    | 10734.5   | 0.00000 | ppm   |      | 7            |               |

JohnPhos\_Ar\_Br\_54\_B\_RT\_24H:

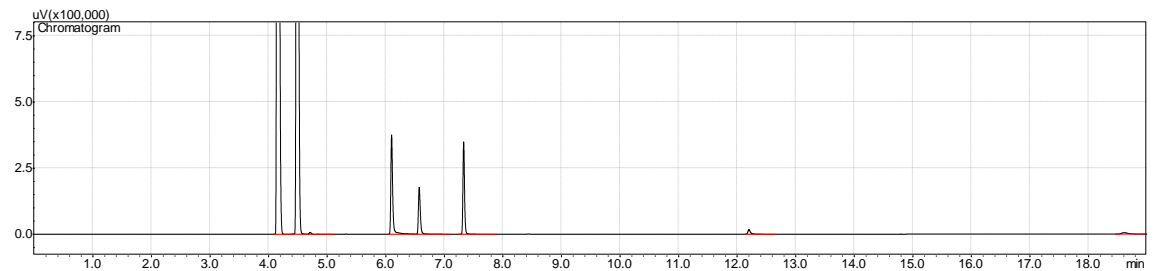

| Peak# | Ret.Time | Area       | Height    | Conc.   | Units | Mark | Compound ID# | Compound Name |
|-------|----------|------------|-----------|---------|-------|------|--------------|---------------|
| 1     | 4.151    | 13773870.0 | 5416126.1 | 0.00000 | ppm   | V    | 1            |               |
| 2     | 4.485    | 11961240.9 | 5386185.1 | 0.00000 | ppm   | SV   | 1            |               |
| 3     | 6.099    | 856620.7   | 372226.5  | 0.00000 |       |      |              |               |
| 4     | 6.571    | 749365.4   | 174547.8  | 0.00000 | ppm   | SV   | 2            | m-xylene      |
| 5     | 7.330    | 662937.6   | 345925.9  | 0.00000 | ppm   | S    | 3            |               |
| 6     | 12.200   | 57175.1    | 17780.7   | 0.00000 |       | S    |              |               |
| 7     | 18.608   | 43820.9    | 5535.3    | 0.00000 | ppm   |      | 8            |               |

ArCl 100 °C

3-Phenyl-pyridine

Ar\_Cl\_26.1\_100oC\_3\_pyridine\_Tol\_To

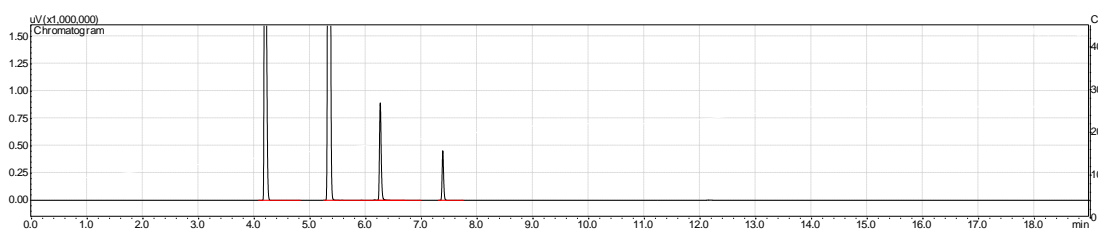

| Peak# | Ret.Time | Area       | Height     | Conc.   | Units | Mark | Compound ID# | Compound Name    |
|-------|----------|------------|------------|---------|-------|------|--------------|------------------|
| 1     | 4.191    | 11039719.4 | 4417633.9  | 0.00000 | ppm   | SV   | 1            | DCM              |
| 2     | 5.336    | 38237661.7 | 16980543.7 | 0.00000 |       | SV   |              | Toluene          |
| 3     | 6.260    | 1928722.3  | 885425.8   | 0.00000 |       | TV   |              | 3-chloropyridine |
| 4     | 7.382    | 850484.3   | 446759.9   | 0.00000 |       | S    |              | n-decane IS      |

Ar\_Cl\_26.1\_L1\_100oC\_12H:

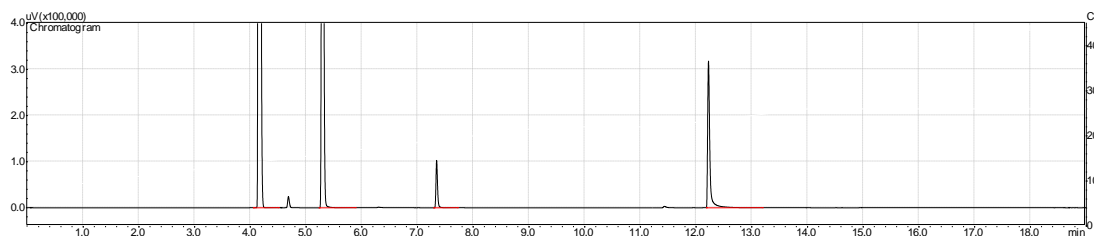

| Peak# | Ret.Time | Area       | Height    | Conc.   | Units | Mark | Compound ID# | Compound Name |
|-------|----------|------------|-----------|---------|-------|------|--------------|---------------|
| 1     | 4.154    | 11825670.8 | 4877005.1 | 0.00000 | ppm   | SV   | 1            |               |



|   |        |           |           |         |     |   |   |  |
|---|--------|-----------|-----------|---------|-----|---|---|--|
| 2 | 5.294  | 6634961.2 | 3259328.5 | 0.00000 |     |   |   |  |
| 3 | 7.343  | 208339.8  | 102602.9  | 0.00000 | ppm |   | 3 |  |
| 4 | 12.223 | 892932.2  | 314951.1  | 0.00000 |     | V |   |  |

Ar\_Cl\_26.1\_L3\_100oC\_12H:

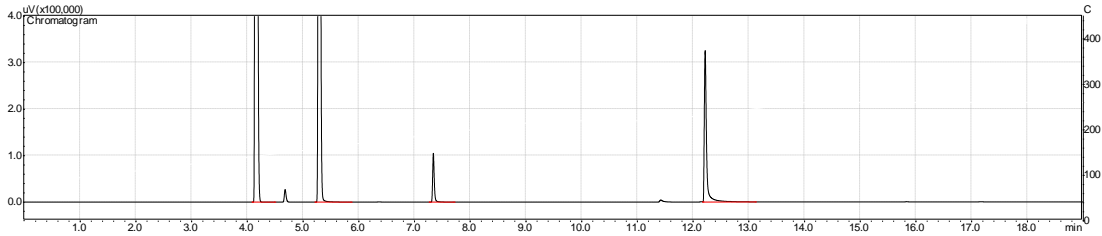

| Peak# | Ret.Time | Area       | Height    | Conc.   | Units | Mark | Compound ID# | Compound Name |
|-------|----------|------------|-----------|---------|-------|------|--------------|---------------|
| 1     | 4.149    | 11689753.5 | 4809300.3 | 0.00000 | ppm   | SV   | 1            |               |
| 2     | 5.289    | 9041540.2  | 4416504.7 | 0.00000 |       |      |              |               |
| 3     | 7.338    | 211744.4   | 103893.6  | 0.00000 | ppm   | S    | 3            |               |
| 4     | 12.217   | 916760.0   | 324363.4  | 0.00000 |       | V    |              |               |

Ar\_Cl\_26.1\_L2\_100oC\_12H:

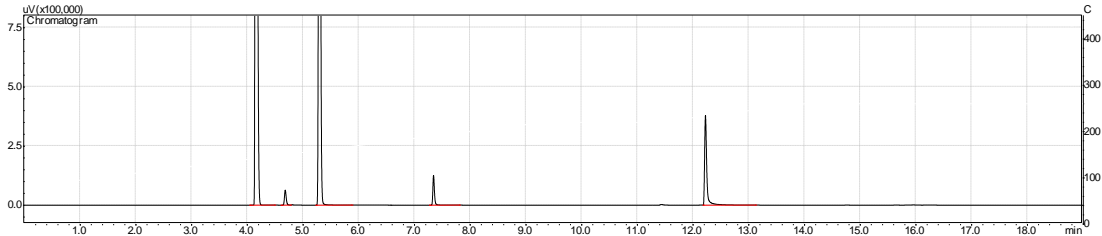

| Peak# | Ret.Time | Area       | Height    | Conc.   | Units | Mark | Compound ID# | Compound Name |
|-------|----------|------------|-----------|---------|-------|------|--------------|---------------|
| 1     | 4.153    | 11767746.5 | 4829202.9 | 0.00000 | ppm   | SV   | 1            |               |
| 2     | 4.680    | 138934.4   | 63249.4   | 0.00000 |       |      |              |               |
| 3     | 5.293    | 9732018.2  | 4709539.7 | 0.00000 |       |      |              |               |
| 4     | 7.342    | 250095.5   | 123484.1  | 0.00000 | ppm   | S    | 3            |               |
| 5     | 12.222   | 1033532.8  | 374804.8  | 0.00000 |       | V    |              |               |

Ar\_Cl\_26.1\_CyJohnPhos\_100oC\_12H:

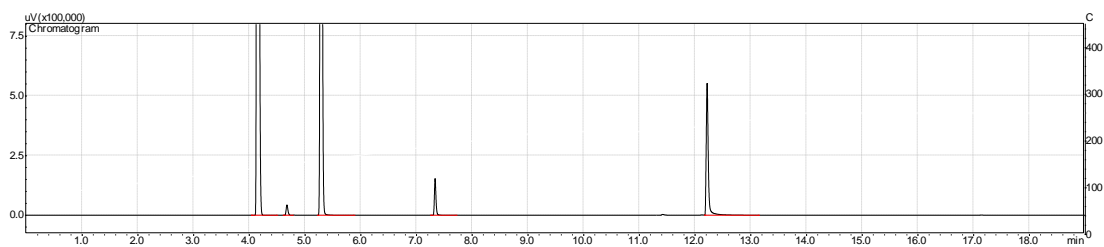

| Peak# | Ret.Time | Area       | Height    | Conc.   | Units | Mark | Compound ID# | Compound Name |
|-------|----------|------------|-----------|---------|-------|------|--------------|---------------|
| 1     | 4.143    | 15362394.2 | 5981098.1 | 0.00000 | ppm   | SV   | 1            |               |
| 2     | 4.674    | 99815.7    | 43646.7   | 0.00000 |       |      |              |               |
| 3     | 5.286    | 12508931.5 | 6078581.6 | 0.00000 |       |      |              |               |
| 4     | 7.334    | 304680.9   | 153513.5  | 0.00000 | ppm   | S    | 3            |               |
| 5     | 12.216   | 1445744.0  | 549515.7  | 0.00000 |       | V    |              |               |

Ar\_Cl\_26.1\_PPh3\_100oC\_12H:

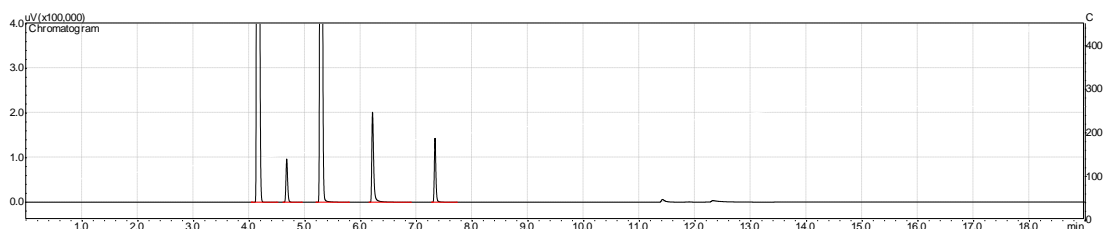

| Peak# | Ret.Time | Area       | Height    | Conc.   | Units | Mark | Compound ID# | Compound Name |
|-------|----------|------------|-----------|---------|-------|------|--------------|---------------|
| 1     | 4.146    | 11546439.0 | 4750217.9 | 0.00000 | ppm   | SV   | 1            |               |
| 2     | 4.671    | 204939.8   | 96523.8   | 0.00000 |       |      |              |               |
| 3     | 5.284    | 10501716.5 | 5120604.0 | 0.00000 |       |      |              |               |
| 4     | 6.211    | 480596.6   | 200817.0  | 0.00000 |       | V    |              |               |
| 5     | 7.332    | 279433.6   | 140085.9  | 0.00000 | ppm   | S    | 3            |               |

Ar\_Cl\_26.1\_JohnPhos\_100oC\_12H:

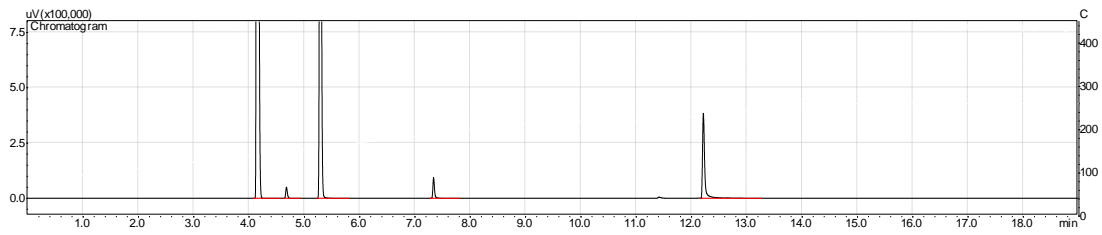

| Peak# | Ret.Time | Area       | Height    | Conc.   | Units | Mark | Compound ID# | Compound Name |
|-------|----------|------------|-----------|---------|-------|------|--------------|---------------|
| 1     | 4.144    | 13721179.4 | 5613706.3 | 0.00000 | ppm   | SV   | 1            |               |
| 2     | 4.676    | 107447.1   | 50976.2   | 0.00000 |       |      |              |               |
| 3     | 5.288    | 8191981.9  | 4061934.9 | 0.00000 |       |      |              |               |
| 4     | 7.336    | 194154.6   | 92147.3   | 0.00000 | ppm   | V    | 3            |               |
| 5     | 12.214   | 1072533.9  | 379162.1  | 0.00000 |       | SV   |              |               |

Ar\_Cl\_26.1\_SPhos\_100oC\_12H:

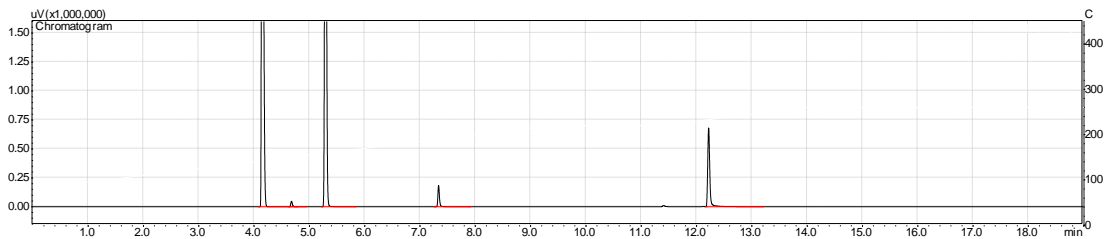

| Peak# | Ret.Time | Area       | Height    | Conc.   | Units | Mark | Compound ID# | Compound Name |
|-------|----------|------------|-----------|---------|-------|------|--------------|---------------|
| 1     | 4.146    | 13014778.6 | 5403624.3 | 0.00000 | ppm   | SV   | 1            |               |
| 2     | 4.676    | 101049.0   | 47627.1   | 0.00000 |       | T    |              |               |
| 3     | 5.290    | 12950760.8 | 6379061.7 | 0.00000 |       | S    |              |               |
| 4     | 7.336    | 370822.0   | 181037.4  | 0.00000 | ppm   | SV   | 3            |               |
| 5     | 12.219   | 1800012.8  | 671415.5  | 0.00000 |       | SV   |              |               |

2-Phenyl-pyridine

Ar\_Cl\_30.1\_100oC\_2\_pyridine\_Tol\_To

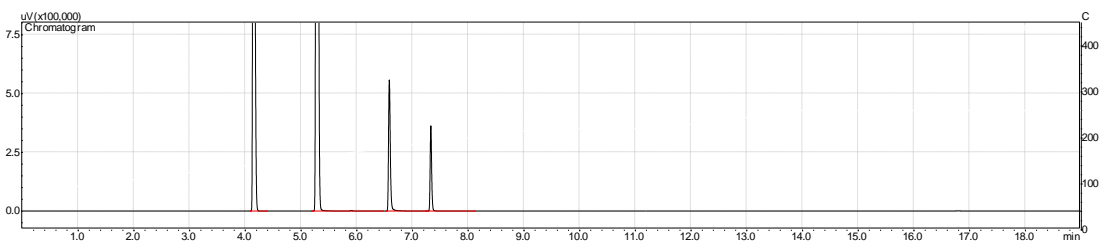

| Peak# | Ret.Time | Area       | Height     | Conc.   | Units | Mark | Compound ID# | Compound Name    |
|-------|----------|------------|------------|---------|-------|------|--------------|------------------|
| 1     | 4.147    | 8990469.1  | 3848185.9  | 0.00000 | ppm   | V    | 1            | DCM              |
| 2     | 5.284    | 26343487.9 | 12270770.1 | 0.00000 |       | SV   |              | Toluene          |
| 3     | 6.584    | 1240265.4  | 554547.3   | 0.00000 | ppm   |      | 2            | 2-chloropyridine |
| 4     | 7.329    | 679307.9   | 358683.8   | 0.00000 | ppm   | SV   | 3            | <i>n</i> -decane |

Ar\_Cl\_30.1\_L1\_100oC\_12H:

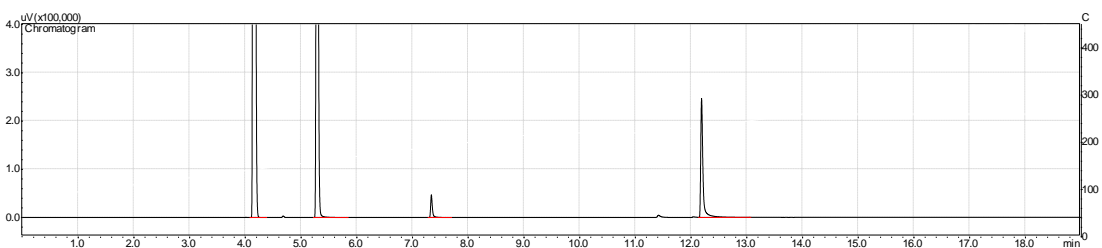

| Peak# | Ret.Time | Area       | Height    | Conc.   | Units | Mark | Compound ID# | Compound Name |
|-------|----------|------------|-----------|---------|-------|------|--------------|---------------|
| 1     | 4.147    | 12348438.2 | 5068966.4 | 0.00000 | ppm   | V    | 1            |               |
| 2     | 5.287    | 5380124.7  | 2650662.2 | 0.00000 |       |      |              |               |
| 3     | 7.338    | 103085.8   | 46277.2   | 0.00000 | ppm   |      | 3            |               |
| 4     | 12.188   | 695124.3   | 245505.6  | 0.00000 |       | SV   |              |               |

Ar\_Cl\_30.1\_L3\_100oC\_12H:

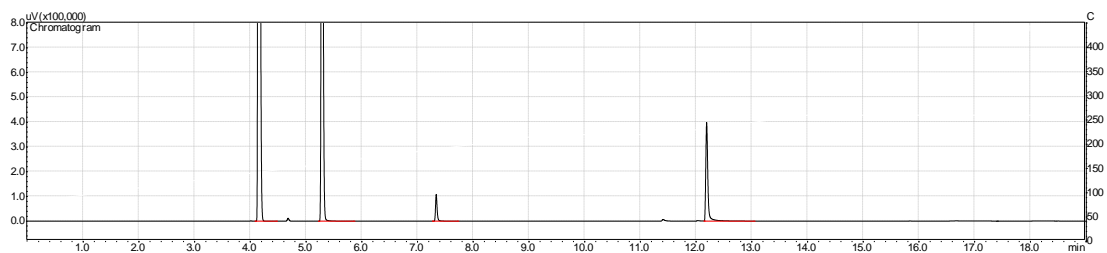

| Peak# | Ret.Time | Area       | Height    | Conc.   | Units | Mark | Compound ID# | Compound Name |
|-------|----------|------------|-----------|---------|-------|------|--------------|---------------|
| 1     | 4.148    | 11753908.3 | 4853412.5 | 0.00000 | ppm   | SV   | 1            |               |
| 2     | 5.287    | 7547741.3  | 3707106.6 | 0.00000 |       |      |              |               |
| 3     | 7.336    | 219597.6   | 107392.8  | 0.00000 | ppm   |      | 3            |               |
| 4     | 12.189   | 1053791.7  | 395283.1  | 0.00000 |       | V    |              |               |

Ar\_Cl\_30.1\_L2\_100oC\_12H:

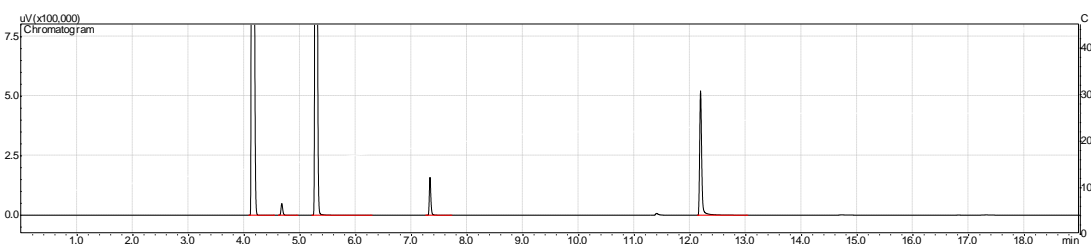

| Peak# | Ret.Time | Area       | Height    | Conc.   | Units | Mark | Compound ID# | Compound Name |
|-------|----------|------------|-----------|---------|-------|------|--------------|---------------|
| 1     | 4.141    | 15400379.9 | 5953124.5 | 0.00000 | ppm   | SV   | 1            |               |
| 2     | 4.672    | 108384.1   | 48873.2   | 0.00000 |       | S    |              |               |
| 3     | 5.285    | 13953794.4 | 6719422.4 | 0.00000 |       | S    |              |               |
| 4     | 7.332    | 310025.5   | 155300.2  | 0.00000 | ppm   | S    | 3            |               |
| 5     | 12.188   | 1349421.9  | 520222.2  | 0.00000 |       | V    |              |               |

Ar\_Cl\_30.1\_JohnPhos\_100oC\_12H:

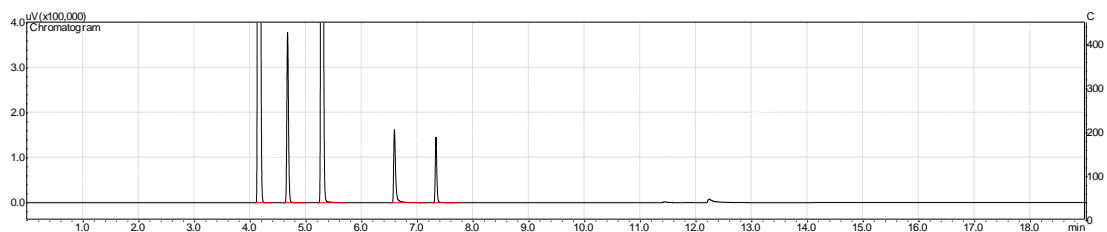

| Peak# | Ret.Time | Area       | Height    | Conc.   | Units | Mark | Compound ID# | Compound Name |
|-------|----------|------------|-----------|---------|-------|------|--------------|---------------|
| 1     | 4.145    | 11677076.5 | 4786424.0 | 0.00000 | ppm   | V    | 1            |               |
| 2     | 4.668    | 782494.2   | 374761.9  | 0.00000 |       |      |              |               |
| 3     | 5.283    | 9839776.2  | 4765660.0 | 0.00000 |       |      |              |               |
| 4     | 6.586    | 402537.3   | 160203.4  | 0.00000 | ppm   |      | 2            |               |
| 5     | 7.331    | 280776.8   | 143752.8  | 0.00000 | ppm   | S    | 3            |               |

Ar\_Cl\_30.1\_SPhos\_100oC\_12H:

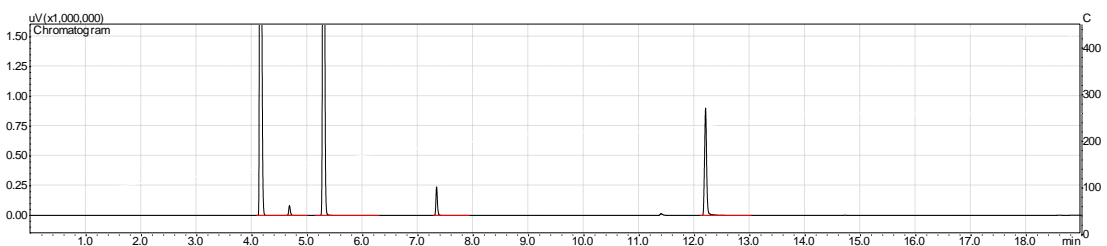

| Peak# | Ret.Time | Area       | Height    | Conc.   | Units | Mark | Compound ID# | Compound Name |
|-------|----------|------------|-----------|---------|-------|------|--------------|---------------|
| 1     | 4.147    | 12695457.9 | 5303325.7 | 0.00000 | ppm   | SV   | 1            |               |
| 2     | 4.676    | 171727.7   | 83206.0   | 0.00000 |       | T    |              |               |
| 3     | 5.290    | 15025541.6 | 7372664.0 | 0.00000 |       | S    |              |               |
| 4     | 7.336    | 466129.2   | 238517.2  | 0.00000 | ppm   | SV   | 3            |               |
| 5     | 12.199   | 2374982.6  | 892680.6  | 0.00000 |       | S    |              |               |

Ar\_Cl\_30.1\_CyJohnPhos\_100oC\_12H:

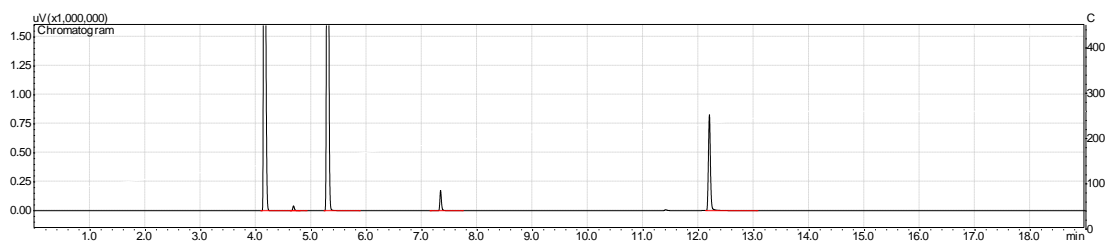

| Peak# | Ret.Time | Area       | Height    | Conc.   | Units | Mark | Compound ID# | Compound Name |
|-------|----------|------------|-----------|---------|-------|------|--------------|---------------|
| 1     | 4.148    | 12191598.5 | 5144028.0 | 0.00000 | ppm   | SV   | 1            |               |
| 2     | 4.677    | 88780.0    | 41740.8   | 0.00000 |       | T    |              |               |
| 3     | 5.291    | 16970853.4 | 8262172.9 | 0.00000 |       |      |              |               |
| 4     | 7.335    | 346384.4   | 173891.8  | 0.00000 | ppm   |      | 3            |               |
| 5     | 12.196   | 2152950.3  | 824073.6  | 0.00000 |       | SV   |              |               |

## 2-Phenyl-quinoline

Ar\_Cl\_48\_100oC\_Chloroquinoline\_To

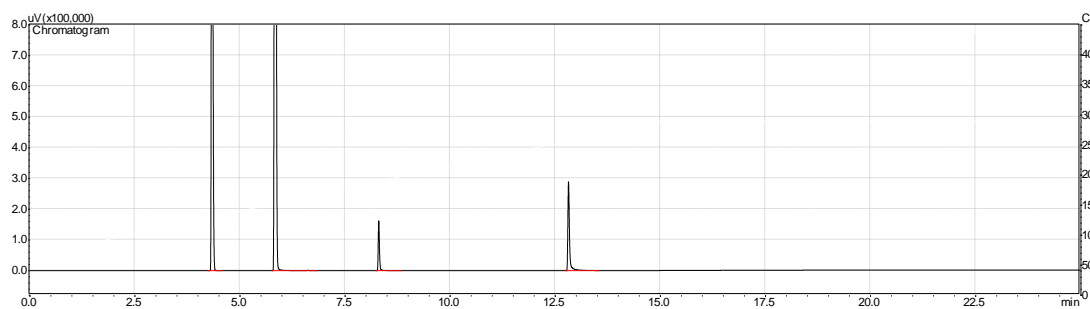

| Peak# | Ret.Time | Area       | Height    | Conc.   | Units | Mark | Compound ID# | Compound Name     |
|-------|----------|------------|-----------|---------|-------|------|--------------|-------------------|
| 1     | 4.332    | 6240701.7  | 2776323.1 | 0.00000 |       | V    |              | DCM               |
| 2     | 5.836    | 16052460.8 | 7254581.6 | 0.00000 | ppm   | S    | 2            | Toluene           |
| 3     | 8.300    | 336755.7   | 161675.0  | 0.00000 |       |      |              | <i>n</i> -decane  |
| 4     | 12.815   | 796669.5   | 285790.0  | 0.00000 |       |      |              | 2-chloroquinoline |

L1\_Cl\_48\_100oC\_12H:

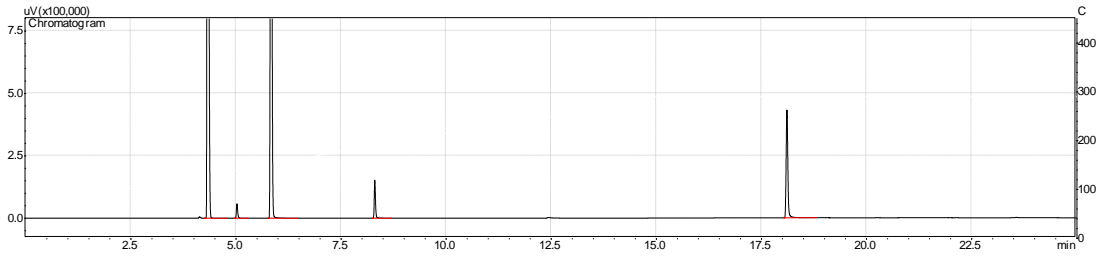

| Peak# | Ret.Time | Area       | Height    | Conc.   | Units | Mark | Compound ID# | Compound Name |
|-------|----------|------------|-----------|---------|-------|------|--------------|---------------|
| 1     | 4.324    | 10453473.0 | 4311027.9 | 0.00000 |       | SV   |              |               |
| 2     | 5.022    | 124399.9   | 56044.8   | 0.00000 |       |      |              |               |
| 3     | 5.833    | 9506672.2  | 4466531.1 | 0.00000 | ppm   |      | 2            |               |
| 4     | 8.301    | 311108.9   | 151723.5  | 0.00000 |       | S    |              |               |
| 5     | 18.106   | 1231473.2  | 428887.2  | 0.00000 | ppm   |      | 13           |               |

L3\_Ar\_Cl\_48\_100oC\_12H:

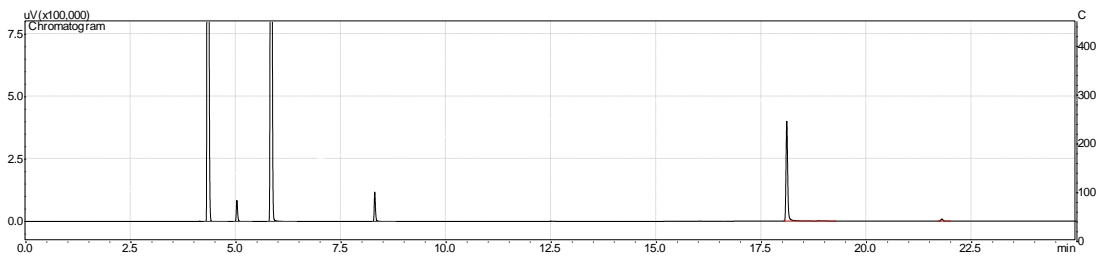

| Peak# | Ret.Time | Area       | Height    | Conc.   | Units | Mark | Compound ID# | Compound Name |
|-------|----------|------------|-----------|---------|-------|------|--------------|---------------|
| 1     | 4.324    | 9892997.2  | 4123602.5 | 0.00000 |       | SV   |              |               |
| 2     | 5.021    | 183266.0   | 84103.1   | 0.00000 |       |      |              |               |
| 3     | 5.834    | 12470171.8 | 5721271.8 | 0.00000 | ppm   |      | 2            |               |
| 4     | 8.300    | 247564.4   | 117355.5  | 0.00000 |       |      |              |               |
| 5     | 18.102   | 1148064.8  | 395164.0  | 0.00000 | ppm   | S    | 13           |               |
| 6     | 21.792   | 29678.9    | 8926.6    | 0.00000 | ppm   |      | 14           |               |

L2 Ar\_Cl\_48\_100oC\_12H:



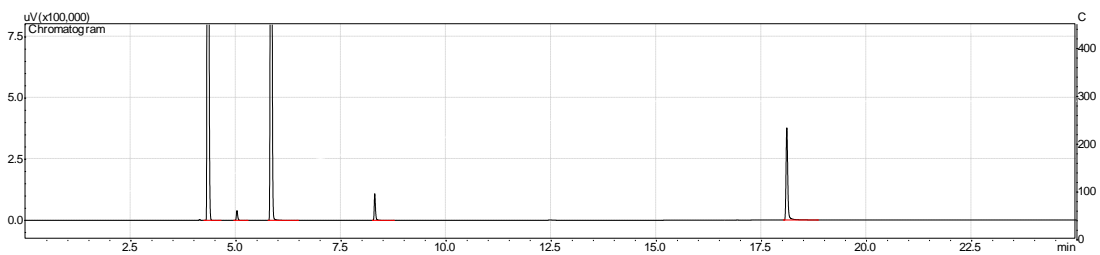

| Peak# | Ret.Time | Area       | Height    | Conc.   | Units | Mark | Compound ID# | Compound Name |
|-------|----------|------------|-----------|---------|-------|------|--------------|---------------|
| 1     | 4.325    | 9582109.5  | 4023679.0 | 0.00000 |       | V    |              |               |
| 2     | 5.022    | 89052.6    | 39496.1   | 0.00000 |       |      |              |               |
| 3     | 5.833    | 10843873.2 | 5029210.7 | 0.00000 | ppm   | S    | 2            |               |
| 4     | 8.301    | 231285.8   | 108766.0  | 0.00000 |       |      |              |               |
| 5     | 18.103   | 1086977.9  | 374332.5  | 0.00000 | ppm   |      | 13           |               |

CyJohnPhos\_Cl\_48\_100oC\_12H:

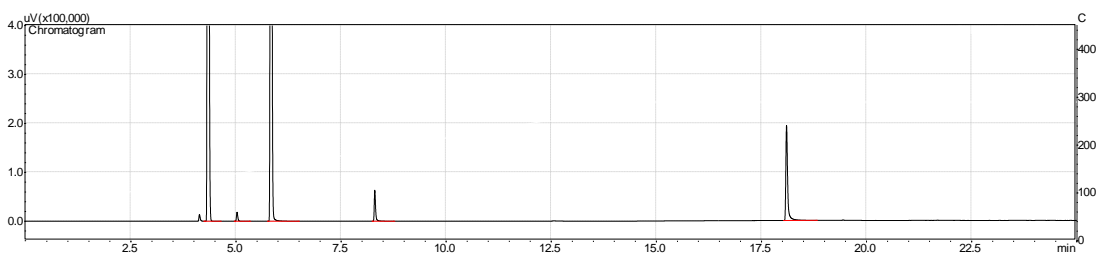

| Peak# | Ret.Time | Area      | Height    | Conc.   | Units | Mark | Compound ID# | Compound Name |
|-------|----------|-----------|-----------|---------|-------|------|--------------|---------------|
| 1     | 4.328    | 8019770.6 | 3456640.8 | 0.00000 |       | V    |              |               |
| 2     | 5.025    | 43474.7   | 18582.6   | 0.00000 |       | S    |              |               |
| 3     | 5.831    | 7316237.5 | 3473794.8 | 0.00000 | ppm   |      | 2            |               |
| 4     | 8.301    | 143183.7  | 63221.2   | 0.00000 |       |      |              |               |
| 5     | 18.097   | 592033.7  | 192817.8  | 0.00000 | ppm   |      | 13           |               |

JohnPhos\_Cl\_48\_100oC\_12H:

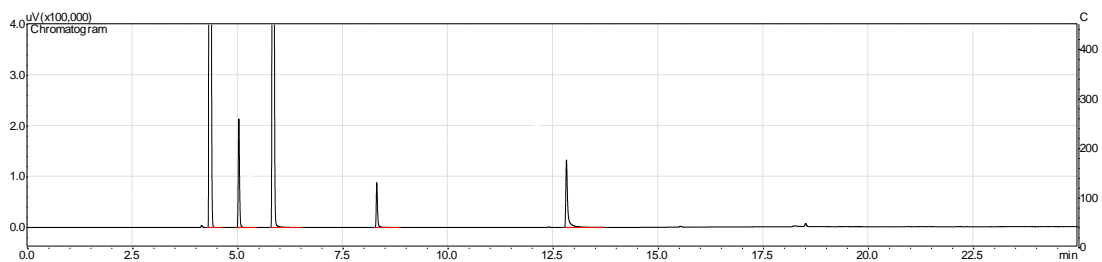

| Peak# | Ret.Time | Area       | Height    | Conc.   | Units | Mark | Compound ID# | Compound Name |
|-------|----------|------------|-----------|---------|-------|------|--------------|---------------|
| 1     | 4.324    | 10248078.1 | 4248594.6 | 0.00000 |       | V    |              |               |
| 2     | 5.019    | 450736.2   | 213042.1  | 0.00000 |       | S    |              |               |
| 3     | 5.832    | 9440277.0  | 4447060.6 | 0.00000 | ppm   |      | 2            |               |
| 4     | 8.301    | 194120.1   | 88047.2   | 0.00000 |       |      |              |               |
| 5     | 12.813   | 429556.8   | 132759.8  | 0.00000 |       | S    |              |               |

SPhos\_Cl\_48\_100oC\_12H:

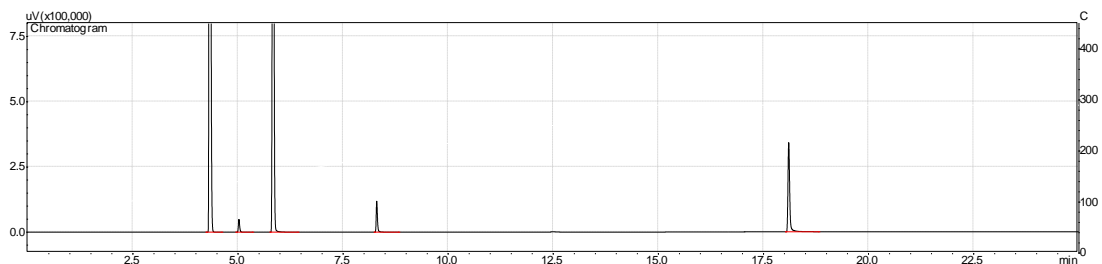

| Peak# | Ret.Time | Area       | Height    | Conc.   | Units | Mark | Compound ID# | Compound Name |
|-------|----------|------------|-----------|---------|-------|------|--------------|---------------|
| 1     | 4.324    | 10419027.8 | 4288777.7 | 0.00000 |       | V    |              |               |
| 2     | 5.022    | 107581.5   | 47532.4   | 0.00000 |       | S    |              |               |
| 3     | 5.832    | 9696839.6  | 4554054.5 | 0.00000 | ppm   |      | 2            |               |
| 4     | 8.300    | 252609.1   | 118389.7  | 0.00000 |       |      |              |               |
| 5     | 18.101   | 994516.0   | 339292.5  | 0.00000 | ppm   |      | 13           |               |

2-Phenyl-thiophene

Ar\_Cl\_49\_100oC\_To

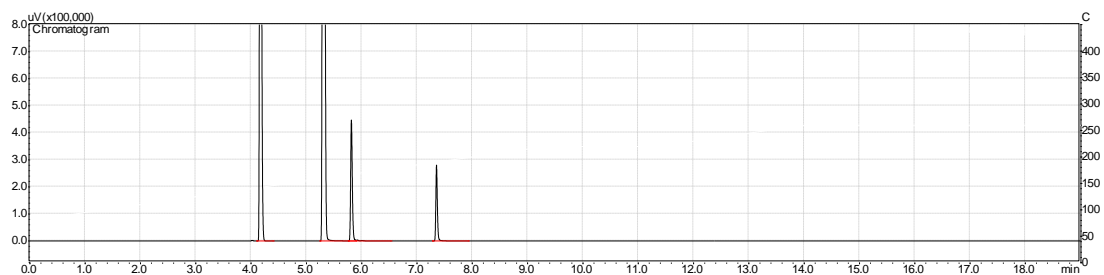

| Peak# | Ret.Time | Area       | Height     | Conc.   | Units | Mark | Compound ID# | Compound Name     |
|-------|----------|------------|------------|---------|-------|------|--------------|-------------------|
| 1     | 4.166    | 7172632.1  | 3288232.5  | 0.00000 | ppm   | V    | 1            | DCM               |
| 2     | 5.308    | 23182824.3 | 10939671.4 | 0.00000 |       | S    |              | Toluene           |
| 3     | 5.813    | 933589.9   | 444096.0   | 0.00000 |       | T    |              | 2-chlorothiophene |
| 4     | 7.352    | 541549.4   | 278700.3   | 0.00000 |       | S    |              | n-decane (IS)     |

L1\_Cl\_49\_100oC\_12H:

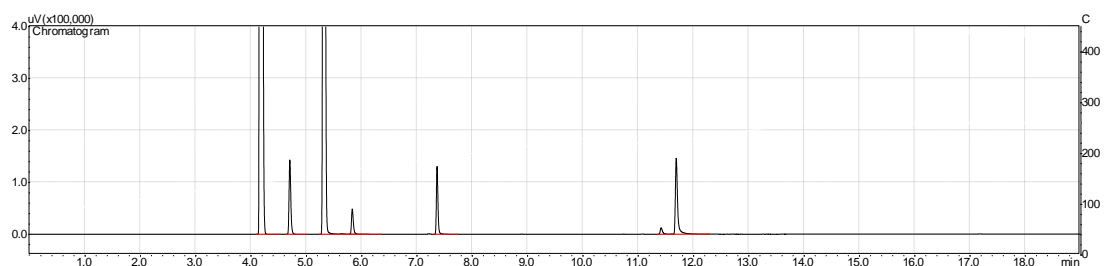

| Peak# | Ret.Time | Area       | Height    | Conc.   | Units | Mark | Compound ID# | Compound Name |
|-------|----------|------------|-----------|---------|-------|------|--------------|---------------|
| 1     | 4.166    | 18252199.5 | 6860769.7 | 0.00000 | ppm   | SV   | 1            |               |
| 2     | 4.701    | 311900.5   | 141314.5  | 0.00000 |       |      |              |               |
| 3     | 5.315    | 11839791.3 | 5692233.7 | 0.00000 |       | S    |              |               |
| 4     | 5.829    | 112210.4   | 47744.0   | 0.00000 |       | T    |              |               |
| 5     | 7.363    | 257089.3   | 130008.3  | 0.00000 |       | SV   |              |               |
| 6     | 11.414   | 37397.8    | 12423.1   | 0.00000 |       | S    |              |               |
| 7     | 11.687   | 413945.7   | 144619.2  | 0.00000 |       | V    |              |               |

L3\_Ar\_Cl\_49\_100oC\_12H:

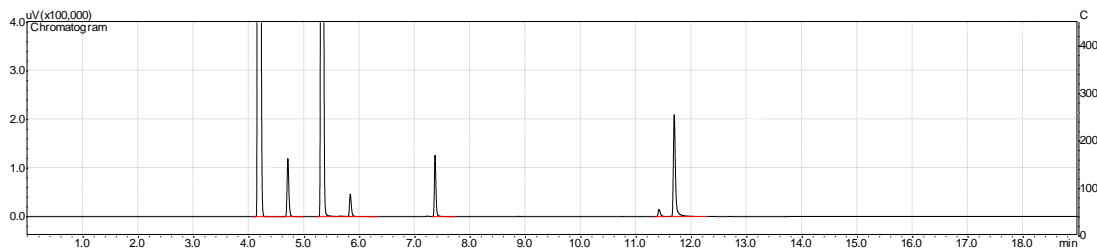

| Peak# | Ret.Time | Area       | Height    | Conc.   | Units | Mark | Compound ID# | Compound Name |
|-------|----------|------------|-----------|---------|-------|------|--------------|---------------|
| 1     | 4.167    | 17696207.0 | 6696974.2 | 0.00000 | ppm   | SV   | 1            |               |
| 2     | 4.701    | 265710.2   | 118526.6  | 0.00000 |       |      |              |               |
| 3     | 5.316    | 14153727.5 | 6727654.4 | 0.00000 |       | S    |              |               |
| 4     | 5.830    | 106647.4   | 45492.3   | 0.00000 |       | TV   |              |               |
| 5     | 7.362    | 250540.5   | 125804.2  | 0.00000 |       | SV   |              |               |
| 6     | 11.412   | 42062.0    | 14418.3   | 0.00000 |       |      |              |               |
| 7     | 11.687   | 562891.8   | 207140.2  | 0.00000 |       | V    |              |               |

L2 Ar\_Cl\_49\_100oC\_12H:

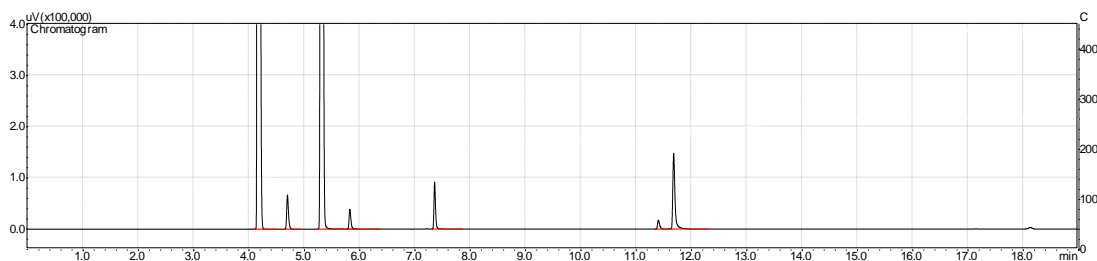

| Peak# | Ret.Time | Area       | Height     | Conc.   | Units | Mark | Compound ID# | Compound Name |
|-------|----------|------------|------------|---------|-------|------|--------------|---------------|
| 1     | 4.161    | 16332761.3 | 6296376.8  | 0.00000 | ppm   | SV   | 1            | DCM           |
| 2     | 4.694    | 153810.2   | 67036.8    | 0.00000 |       |      |              |               |
| 3     | 5.309    | 22151461.5 | 10451673.2 | 0.00000 |       | S    |              |               |
| 4     | 5.822    | 89627.8    | 38481.3    | 0.00000 |       | T    |              |               |
| 5     | 7.355    | 190891.7   | 91422.0    | 0.00000 |       | V    |              |               |
| 6     | 11.400   | 51012.2    | 17870.0    | 0.00000 |       |      |              |               |
| 7     | 11.676   | 417983.7   | 147217.9   | 0.00000 |       | V    |              |               |

PPh3\_Ar\_Cl\_49\_100oC\_12H:

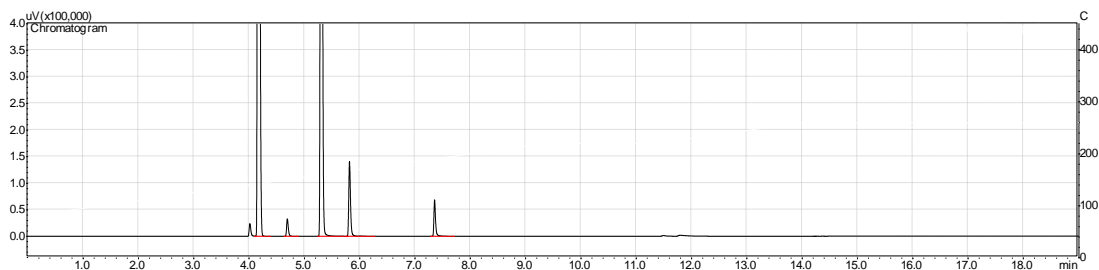

| Peak# | Ret.Time | Area      | Height    | Conc.   | Units | Mark | Compound ID# | Compound Name |
|-------|----------|-----------|-----------|---------|-------|------|--------------|---------------|
| 1     | 4.165    | 9027123.7 | 3989634.0 | 0.00000 | ppm   | V    | 1            |               |
| 2     | 4.692    | 71452.4   | 32492.3   | 0.00000 |       |      |              |               |
| 3     | 5.304    | 6249984.7 | 3121762.0 | 0.00000 |       |      |              |               |
| 4     | 5.815    | 312888.8  | 137915.7  | 0.00000 |       | SV   |              |               |
| 5     | 7.354    | 146539.7  | 68207.9   | 0.00000 |       |      |              |               |

CyJohnPhos\_Cl\_49\_100oC\_12H:

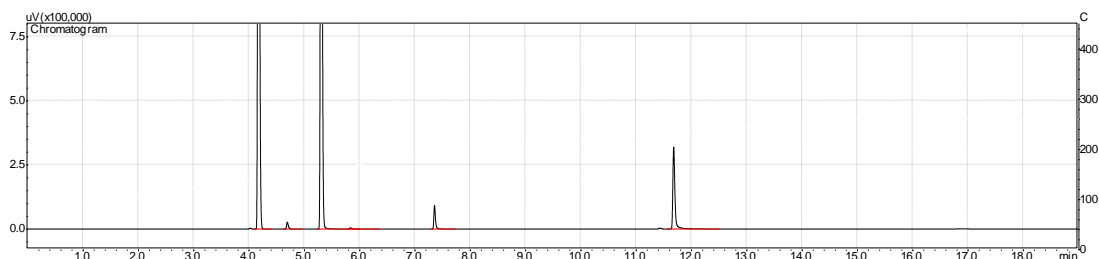

| Peak# | Ret.Time | Area      | Height    | Conc.   | Units | Mark | Compound ID# | Compound Name |
|-------|----------|-----------|-----------|---------|-------|------|--------------|---------------|
| 1     | 4.167    | 7267696.3 | 3300123.9 | 0.00000 | ppm   | V    | 1            | DCM           |
| 2     | 4.691    | 62490.7   | 27018.1   | 0.00000 |       |      |              |               |
| 3     | 5.303    | 7662202.6 | 3806112.5 | 0.00000 |       | S    |              |               |
| 4     | 5.831    | 14399.8   | 5220.0    | 0.00000 |       | T    |              |               |
| 5     | 7.353    | 191201.6  | 91342.3   | 0.00000 |       |      |              |               |
| 6     | 11.677   | 858927.6  | 315988.8  | 0.00000 |       | SV   |              |               |

JohnPhos\_Cl\_49\_100oC\_12H:

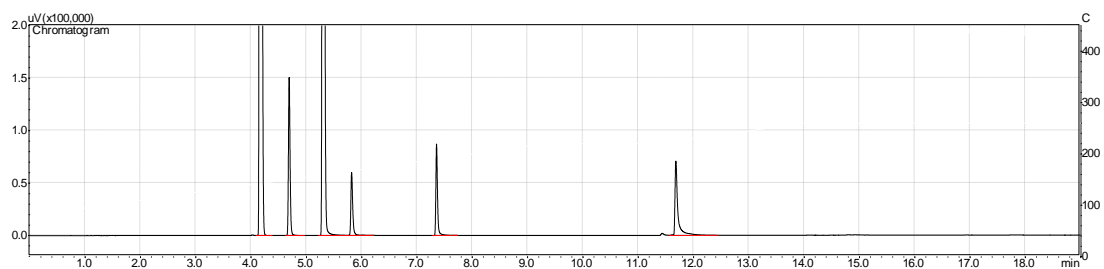

| Peak# | Ret.Time | Area      | Height    | Conc.   | Units | Mark | Compound ID# | Compound Name |
|-------|----------|-----------|-----------|---------|-------|------|--------------|---------------|
| 1     | 4.165    | 8707477.1 | 3861784.2 | 0.00000 | ppm   | V    | 1            |               |
| 2     | 4.688    | 307077.6  | 149805.8  | 0.00000 |       |      |              |               |
| 3     | 5.303    | 6556199.8 | 3265192.0 | 0.00000 |       |      |              |               |
| 4     | 5.818    | 141885.6  | 59761.9   | 0.00000 |       | SV   |              |               |
| 5     | 7.353    | 182073.6  | 86597.6   | 0.00000 |       |      |              |               |
| 6     | 11.680   | 257016.5  | 70531.5   | 0.00000 |       | V    |              |               |

SPhos\_Cl\_49\_100oC\_12H:

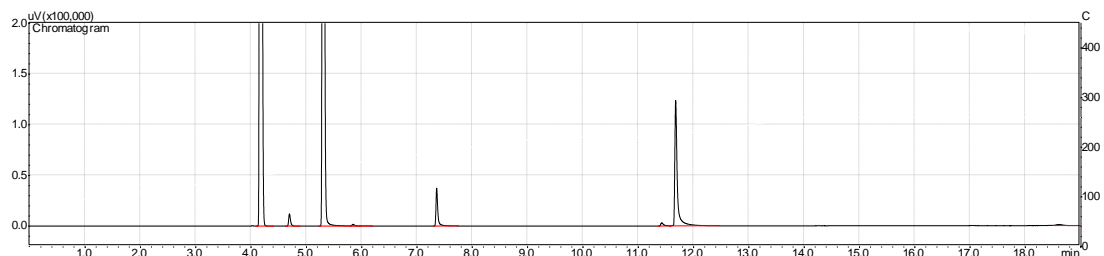

| Peak# | Ret.Time | Area      | Height    | Conc.   | Units | Mark | Compound ID# | Compound Name |
|-------|----------|-----------|-----------|---------|-------|------|--------------|---------------|
| 1     | 4.167    | 7712414.9 | 3491763.0 | 0.00000 | ppm   | V    | 1            |               |
| 2     | 4.693    | 28371.2   | 12128.8   | 0.00000 |       |      |              |               |
| 3     | 5.303    | 4560092.4 | 2263536.8 | 0.00000 |       | S    |              |               |
| 4     | 5.843    | 4861.9    | 1581.6    | 0.00000 |       | T    |              |               |
| 5     | 7.355    | 87587.6   | 36735.0   | 0.00000 |       |      |              |               |
| 6     | 11.424   | 11466.0   | 3111.5    | 0.00000 |       |      |              |               |
| 7     | 11.677   | 386888.3  | 122571.6  | 0.00000 |       | V    |              |               |

|   |        |         |        |         |     |    |   |  |
|---|--------|---------|--------|---------|-----|----|---|--|
| 8 | 18.605 | 10172.6 | 1160.6 | 0.00000 | ppm | SV | 8 |  |
|---|--------|---------|--------|---------|-----|----|---|--|

General formular for GC calculations

$$\text{Conversion} = \frac{\text{Area (Aryl halide initial)} - \text{Area (Aryl halide final)}}{\text{Area (Aryl halide initial)}} \times 100 \%$$

$$\text{Selectivity} = \frac{\text{Area (Desired product)}}{\text{Area (Sum of products)}} \times 100 \%$$

$$\text{GC yield} = \left[ \frac{\text{Conversion}}{100} \right] \times \left[ \frac{\text{Selectivity}}{100} \right] \times 100 \%$$

References

- 1 A. L. Rheingold, *CSD Commun.*, 2016, 1.
- 2 T. Ikawa, T. E. Barder, M. R. Biscoe and S. L. Buchwald, *J. Am. Chem. Soc.*, 2007, **129**, 13001–13007.
- 3 A. Zask and P. Helquist, *J. Org. Chem.*, 1978, **43**, 1619–1620.
- 4 M. S. Viciu, G. A. Grasa and S. P. Nolan, *Organometallics*, 2001, **20**, 3607–3612.
- 5 Z. Ahmadi and J. S. McIndoe, *Chem. Commun.*, 2013, **49**, 11488–11490.
- 6 C. D. Blakemore, M. Doyle, Paul and M. Fobian, Yvette, *Synthetic Methods in Drug Discovery: Volume 1*, Royal Society of Chemistry, Cambridge, 2016, vol. 1.
- 7 C. W. Cheung and S. L. Buchwald, *Org. Lett.*, 2013, **15**, 3998–4001.
- 8 H. Zhang, P. Ruiz-Castillo, A. W. Schuppe and S. L. Buchwald, *Org. Lett.*, 2020, **22**, 5369–5374.
